# Supplementary material for: Transcriptome and proteome profiling reveal complementary scavenger and immune features of rat liver sinusoidal endothelial cells and liver macrophages
Source: BMC Mol Cell Biol. 2020 Nov 27;21:85. doi: 10.1186/s12860-020-00331-9 (PMC7694354; doi:10.1186/s12860-020-00331-9)
Supplement: Supplementary file 9 — Additional file 9. Analysis of microarray expression data obtained from Nolan et al. 2013 [35]. Excel file (.xls) with the comparative analysis of expression data obtained from a microarray profiling study of mouse (Mus musculus) primary microvascular endothelial cells, published by Nolan DJ, Ginsberg M, Israely E, Palikuqi B, Poulos MG, James D, et al. Molecular signatures of tissue-specific microvascular endothelial cell heterogeneity in organ maintenance and regeneration [35]. The microarray data was downloaded from the GEO public database-Series GSE47067. Title of dataset: In vivo endothelial cell heterogeneity. The first worksheet, named “Pairwise_DGE (Nolan_2013)”, shows pairwise analysis of the expression data of endothelial cells from different organs. The second worksheet, named “DAVID_ liver specific genes”, presents the DAVID enrichment analysis [54, 55] output of genes that were consistently significantly abundant in mouse liver sinusoidal endothelial cells (LSECs) in every pairwise comparison of LSECs with other microvascular endothelial cells in the dataset (Significance level: FDR ≤ 0.05, and log2 fold change ≥1). [file 12860_2020_331_MOESM9_ESM.xlsx]

## Sheet: Pairwise_DGE (Nolan_2013)
Liver A	Liver B	Liver C	Liver D	Liver E	Liver F	BM A	BM B	BM C	BM D	BM E	BM F	Spleen A	Spleen B	Spleen C	Brain A	Brain B	Brain C	Lung A	Lung B	Lung C	Glomerulus A	Glomerulus B	Glomerulus C	adj.P.Val_LVsBM	logFC_LVsBM	adj.P.Val_LVsSpl	logFC_LVsSpl	adj.P.Val_LVsBrain	logFC_LVsBrain	adj.P.Val_LVsL	logFC_LVsL	adj.P.Val_LVsG	logFC_LVsG	ID	Gene.symbol	Liver specific
6.33849	6.4336	6.40868	4.13597	4.29578	4.31791	0	-0.374614	-0.417441	-2.61838	-3.02271	-3.15145	-0.441319	2.50462	2.08321	-0.0677443	0.42613	-0.211014	-0.457295	-0.339729	-0.524724	3.18592	0.758927	1.07339	2.14e-14	6.91917	3.58e-06	3.93957	7.83e-09	5.27262	9.47e-10	5.76232	1.38e-05	3.649	10363224	Fabp7	+
6.79608	7.05853	7.29832	3.35307	3.53212	3.53785	1.04529	0.28861	0.15694	-2.45838	-3.38858	-3.54447	-0.0471621	0.0658474	0.0658474	-0.0470715	0.0354824	0.0265913	0.131543	-0.0533366	-0.119961	0.0337496	-0.0125918	-0.0776124	1.63e-11	6.57943	7.16e-07	5.23448	5.53e-07	5.25766	5.23e-07	5.27658	5.69e-07	5.28148	10605848	Vsig4	+
6.15219	6.59701	6.3147	4.19415	4.73815	4.46213	0.316969	0.486485	-0.0426307	-1.78647	-1.49418	-2.20293	0.150437	-0.249013	-0.171689	-0.0919108	0	-0.163773	3.23891	2.98453	2.77857	-0.210319	-0.267499	0.0701914	7.38e-17	6.19685	3.02e-12	5.49981	1.12e-12	5.49495	6.78e-05	2.40906	1.14e-12	5.5456	10487588	Il1a	+
5.79801	5.77345	5.69593	3.43065	3.67697	3.5614	0.052207	-0.0374212	0.0784845	-2.43288	-2.69673	-2.63757	-0.0238209	0.109881	0.149717	0.00770903	0.171644	0.0469789	-0.0371923	-0.0528321	-0.0842528	-0.129493	-0.209127	-0.136257	6.17e-15	5.93506	3.76e-09	4.57748	2.09e-09	4.58063	1.05e-09	4.71416	7.98e-10	4.81436	10545731	Clec4f	+
6.28692	6.13269	6.12644	3.34199	3.34684	3.28941	1.96211	0.270181	0.102957	-1.41552	-2.7744	-2.77858	0.148049	0.118335	0.181634	-0.187856	-0.148023	-0.194978	-0.00161886	-0.177474	0	-0.340505	-0.199152	-0.408972	5.08e-11	5.52625	6.96e-07	4.60471	1.41e-07	4.931	2.43e-07	4.81374	9.14e-08	5.07026	10492964	Cd5l	+
6.01742	6.41004	6.34135	3.49969	3.77959	3.77675	2.03295	0.0162463	0.443629	-0.719702	-2.71126	-1.68893	0.745491	1.39755	0.0882464	-0.0233445	-0.133305	0.000417	-0.116004	-0.0527401	-0.100145	-0.187038	0	-0.00290012	1.15e-11	5.40865	7.74e-07	4.22705	1.71e-08	5.02289	1.5e-08	5.06044	2.02e-08	5.03412	10358408	Rgs1	+
5.63722	5.63894	5.58149	2.54712	2.64673	2.44437	0.0412464	1.69044	-0.0729589	-3.49324	-1.70048	-3.71187	0.575254	0.4978	0.0317779	0.0257521	-0.249289	0.208505	-0.0521946	-0.169158	0	-0.332027	-0.329081	-0.313232	1.6e-09	5.29046	0.000109726	3.71437	2.85e-05	4.08766	2.06e-05	4.15643	9.16e-06	4.40743	10560618	Apoc1	+
4.91378	5.94597	5.28768	3.99278	5.18025	4.40184	0.4281	0.0277634	0.010685	-0.347213	-1.03687	-1.07535	2.13423	0.440903	0.925517	-0.121541	-0.101871	-0.0407758	-0.191242	-0.0569587	-0.0665026	-0.0646906	-0.0696287	0.00846672	7.8e-16	5.28586	3.82e-09	3.78683	1.35e-12	5.04178	1.21e-12	5.05862	2.21e-12	4.99567	10520452	Il6	+
5.58735	4.88762	4.99059	3.33741	2.48055	2.64068	0.0125549	0.0199659	0.00556016	-2.43391	-2.47834	-2.51597	-0.0493483	-0.00264621	-0.00654221	-0.0515995	-0.00363374	-0.00574017	-0.0165839	-0.049037	-0.0312424	0.00087881	-0.0432894	-0.019608	3.42e-13	5.21906	8.85e-08	4.00688	6.34e-08	4.00769	6.16e-08	4.01965	7.38e-08	4.00804	10513420;10513455	Mup19;Gm2083;Mup18;Mup8;Mup7;Mup17;Mup16;Mup15;Mup14;Mup13;Mup12;Mup11;Mup10;Mup9;Mup5;Mup2;Mup1	+
5.21675	5.42101	5.06596	3.77103	3.93128	3.51829	0.0197587	0.0374913	0.28996	-1.60391	-1.52646	-1.10912	0.0677309	0.027163	0.0202642	0	0.0196953	-0.000371	0.0376062	0.0781398	-0.016964	-0.158371	-0.0733461	-0.239675	1.87e-18	5.1361	2.09e-13	4.449	4.96e-14	4.48095	5.69e-14	4.45446	2.46e-14	4.64452	10422635	C6	+
4.80227	5.35546	5.46244	3.08689	3.68307	3.81828	-0.135242	0.0691934	0.16311	-1.40065	-1.17328	-1.20709	2.36307	0.641205	2.76311	-0.215158	-0.174345	-0.16532	-0.0489583	-0.11412	0.353295	-0.184891	0.0357046	-0.161962	6.1e-12	4.98206	0.000597879	2.44561	1.43e-08	4.55301	5.12e-08	4.30466	2.67e-08	4.47179	10523359	Cxcl13	+
5.28148	4.62387	4.8506	3.15388	2.41168	2.58878	0.0127506	0.0252473	0.0208645	-2.33298	-2.32655	-2.35008	-0.0344367	0.00691843	0.00741434	-0.0310023	0.0119207	0.0181761	-0.0118771	-0.0401316	-0.014056	-0.00678062	-0.036519	-0.0174131	2.9e-13	4.97684	7.42e-08	3.82508	5.54e-08	3.81868	5.01e-08	3.8404	5.86e-08	3.83862	10513437;10513472	Mup19;Gm2083;Mup18;Mup8;Mup7;Mup17;Mup16;Mup15;Mup14;Mup13;Mup12;Mup11;Mup10;Mup9;Mup20;Mup5;Mup2;Mup1	+
4.78902	4.86205	4.6152	3.85931	3.95675	3.72427	-0.276337	0.182175	0.135	-1.60979	-1.21285	-1.24711	0.031879	0.0879622	-0.0854435	0.207084	0	-0.0748391	-0.0284581	-0.252836	-0.0464592	-0.236034	-0.15569	-0.37171	3.54e-19	4.97258	5.46e-14	4.28963	1.84e-14	4.25702	5.88e-15	4.41035	3.8e-15	4.55558	10534493	Ccl24	+
4.88744	5.0545	5.05413	3.11556	3.43949	3.30423	0.388369	-0.0316434	0.212141	-1.513	-2.06961	-1.78217	0.882081	0.0628376	-0.118829	-0.508743	-0.576049	-0.513203	0.222527	0.290498	0.0430913	0.0780382	0.154295	0.590027	7.76e-15	4.94188	3.26e-09	3.8672	1.49e-11	4.67522	1.05e-09	3.95719	2.39e-09	3.86844	10531610	Rasgef1b	+
5.23658	4.36559	4.69159	3.11812	2.45934	2.60157	-0.0295873	0.0881615	0.0100555	-2.35745	-2.17726	-2.3835	-0.0234032	0.0134196	-0.00237083	-0.00507307	0.0115347	0.00760031	0.0233588	-0.0371594	-0.0119038	-0.0397344	-0.0239048	-0.00720835	2.52e-13	4.88706	7e-08	3.74958	5.27e-08	3.74078	4.97e-08	3.75403	5.31e-08	3.76908	10513504	Mup19;Gm2083;Mup18;Mup8;Mup7;Mup17;Mup16;Mup15;Mup14;Mup13;Mup12;Mup11;Mup10;Mup9;Mup20;Mup3;Mup2;Mup1	+
5.19395	4.41621	4.76916	3.08534	2.41147	2.57802	0.00268936	0.0435238	0.00707149	-2.20703	-2.19638	-2.1889	-0.0385451	0.0013504	-0.000939	-0.0474415	0.0111327	0	-0.0116053	-0.045156	-0.0329175	-0.0137739	-0.0417142	-0.0200019	2.05e-13	4.83219	4.5e-08	3.75507	3.12e-08	3.75446	2.9e-08	3.77225	3.48e-08	3.76752	10513428	Mup19;Gm2083;Mup18;Mup8;Mup7;Mup17;Mup16;Mup15;Mup14;Mup13;Mup12;Mup11;Mup10;Mup9;Mup20;Mup5;Mup3;Mup2;Mup1	+
5.03353	4.72067	4.34384	4.7516	4.62504	4.118	-0.179777	0.14702	-0.142878	-0.469496	-0.243152	-0.315267	0.048358	-0.0531864	-0.000474	-0.115112	-0.145257	-0.0636215	0.0726066	0.0541921	-0.148958	0.226861	0.627844	0.199156	3.73e-24	4.79937	1.77e-19	4.60055	2.12e-21	4.70678	4.71e-21	4.60617	1.65e-19	4.24749	10496555	Gbp2b	+
4.88756	4.97435	4.56852	4.29156	4.3934	3.97303	0.300279	0.272675	0.392641	-0.460041	-0.941613	-0.789251	-0.16727	0.057415	-0.185808	-0.0153394	0	0.0510702	-0.0377417	-0.0880179	-0.00865316	-0.197911	-0.0401955	-0.22031	1.05e-20	4.71895	7.93e-17	4.61329	2.02e-17	4.50282	1.25e-17	4.55954	1.18e-17	4.66754	10375472	Timd4	+
4.83358	4.21775	4.4261	2.97454	2.18122	2.39235	-0.0367875	0.0730877	0.0017165	-2.32581	-2.01913	-2.24055	-0.0184023	0.0200777	-0.00263357	-0.0301521	0.00826836	0.00532603	-0.00235748	-0.0394988	-0.00818706	-0.0262439	-0.0257311	-0.00361371	6.89e-13	4.5955	1.76e-07	3.50457	1.31e-07	3.50977	1.26e-07	3.52094	1.35e-07	3.52279	10513467;10513497	Mup19;Gm2083;Mup18;Mup8;Mup7;Mup17;Mup16;Mup15;Mup14;Mup13;Mup12;Mup11;Mup10;Mup9;Mup5;Mup3;Mup2;Mup1	+
4.7682	4.97549	5.45716	1.93522	2.04658	2.53359	0.480525	0.459518	0.656631	-2.68358	-2.41702	-2.26856	1.78354	1.36881	0	-0.113915	0.0570412	0.0918045	-0.0681438	-0.0191307	-0.138161	-0.245227	-0.262009	-0.2342	8.05e-09	4.58145	0.00313718	2.56859	6.37e-05	3.60773	4.15e-05	3.69452	2.37e-05	3.86652	10417526	Dnase1l3	+
4.37312	4.32696	4.24941	3.25729	3.17731	3.17566	0.0834832	-0.0186825	-0.10702	-1.4837	-1.13863	-1.76996	-0.178901	-0.0360365	0	-0.0910978	-0.0843887	-0.064856	-0.00248623	-0.0543442	-0.0402198	0.0462832	-0.189086	-0.054677	9.44e-17	4.49904	1.05e-11	3.8316	4.03e-12	3.84007	5.33e-12	3.79231	5.51e-12	3.82579	10566026	Folr2	+
5.8819	5.80627	5.81539	2.80936	2.80342	2.72876	2.25366	0.396038	1.34254	-0.574011	-2.54202	-1.61643	0.222136	0.145087	0.0304074	0.0758262	-0.255933	0.162546	-0.123213	-0.140915	-0.090507	-0.22678	-0.158763	-0.193967	9.35e-09	4.43089	3.94e-06	4.17497	1.93e-06	4.31337	1.22e-06	4.42573	1e-06	4.50069	10541644	Cd163	+
4.38429	4.49973	4.14467	3.97943	4.05192	3.71658	0.167964	0.0644813	0.265164	-0.531868	-0.651496	-0.451017	0.129886	-0.111172	0.288727	-0.218637	-0.10456	0.175001	0.0735974	-0.171052	0.0304456	-0.293696	-0.140729	-0.239294	1.04e-20	4.3189	2.54e-16	4.02696	1.3e-17	4.17884	1.35e-17	4.15177	5.89e-18	4.35401	10549635	Lilra5	+
4.37033	4.11928	3.94025	3.55234	3.41663	3.13214	-0.158583	-0.0896869	0.151932	-1.23848	-1.01622	-0.934131	0.0321879	0.0984254	0.254981	-0.00581694	0.0317192	-0.00961208	-0.0651956	0.00689554	0.0822797	-0.239933	-0.0916877	-0.202138	7.68e-19	4.30269	1.97e-13	3.62663	2.13e-14	3.74973	2.05e-14	3.74717	7.42e-15	3.93308	10421128	Adamdec1	+
4.36933	5.05472	4.48491	2.90987	3.37077	2.86988	0.432049	0.241087	0.533583	-1.18713	-1.37381	-1.33252	0.147047	0.336691	0.0975657	0.0199037	-0.0349011	0.0785518	0.0496769	0	-0.0424986	-0.150167	-0.0190043	-0.0860615	3.72e-14	4.29104	1.75e-09	3.64948	2.84e-10	3.82206	2.48e-10	3.84085	1.86e-10	3.92832	10541605	Clec4n	+
5.44023	5.82592	5.70839	1.92354	2.40457	2.04496	0.726027	0.676759	1.08399	-0.919809	-1.87605	-2.04764	1.78513	2.06806	0.245485	-0.201435	-0.0692601	0	-0.0807586	-0.0861559	0.0486965	-0.130895	-0.183477	-0.229122	3.42e-08	4.28406	0.00361353	2.52504	1.3e-05	3.9815	1.52e-05	3.93067	9.96e-06	4.07243	10565990	Art2a-ps	+
4.76601	5.032	4.97228	2.83423	2.93313	2.72693	-0.0667505	1.75277	0.310804	-2.50757	-0.199768	-1.64839	0.847927	-0.638982	0.90103	-0.904458	-0.817381	-0.762424	1.11358	1.09432	0.98836	-0.176834	0	0.695956	2.16e-09	4.27058	1.36e-05	3.50744	4.36e-08	4.70552	0.000332025	2.81201	5.8e-06	3.70439	10542172	Clec1b	+
2.01484	2.19755	1.81729	2.05781	2.19203	1.77452	-1.49637	-2.49127	-1.7661	-2.03894	-2.93979	-2.46861	-1.32476	-0.169763	-1.29115	0.0479097	0.366696	0.480309	0.787156	0.536361	0.701747	0.522416	0.649649	0.635304	6.49e-17	4.20918	1.1e-09	2.93756	3.38e-05	1.7107	0.000953362	1.33392	0.000557105	1.40655	10475890	Mertk	+
4.18556	4.42392	4.04686	3.70502	4.05626	3.63947	0.00528049	0.353807	0.00743294	-0.591959	-0.318632	-0.535289	0.042722	-0.0189004	-0.0194907	-0.0293596	-0.0178754	-0.00733471	-0.0290275	-0.00979972	-0.0264969	-0.0912597	-0.0871882	-0.0180717	2.84e-18	4.18941	2.22e-14	4.00807	4.86e-15	4.0277	4.25e-15	4.03129	5.03e-15	4.07502	10367805;10367816	Adgb	+
6.42791	6.71826	6.50649	2.03872	2.30239	2.22535	2.6578	1.98142	2.11133	-1.52036	-1.90298	-2.16812	1.76423	-0.121401	2.02583	-0.239062	-0.236215	-0.0686488	0	-0.087625	-0.14939	-0.116709	-0.0413799	-0.151425	1.37e-05	4.17667	0.00669956	3.14696	0.000153359	4.55116	0.00020361	4.44886	0.000213964	4.47303	10578264	Msr1	+
4.72197	4.74178	4.41303	2.67266	2.81603	2.36743	1.61162	-0.0741458	0.0835457	-0.243211	-2.49523	-1.99753	0.920263	-0.0733361	0.443161	-0.0793219	-0.345827	-0.208167	-0.12946	-0.30391	-0.182689	0	-0.116394	0.476397	4.78e-10	4.14131	1.34e-05	3.19212	4.42e-07	3.83326	4.59e-07	3.8275	2.88e-06	3.50215	10421697	Lacc1	+
5.50246	5.84609	5.35601	2.80245	3.1466	2.72889	2.76286	1.01367	0.786545	-0.133628	-1.87692	-1.94332	2.19227	0.27552	0.0309501	0.0466566	-0.0469041	0.0620165	-0.0146255	-0.0537915	-0.0797343	-0.0610848	-0.0656242	-0.0943379	6.13e-08	4.12888	0.000119072	3.3975	4.07e-06	4.20983	3.02e-06	4.2798	3.21e-06	4.3041	10439312	Cd86	+
3.67479	3.8339	3.76937	1.52262	1.66209	1.60413	0.691948	-1.05773	0.257259	-1.91527	-3.91203	-2.17156	0.453271	-0.0179214	1.16597	-0.973834	-0.72308	-0.0896673	0.56346	0.477472	0.167871	1.75132	-0.143265	0.0298986	2.27e-08	4.02905	0.00710824	2.14405	8.01e-05	3.27335	0.00536476	2.27488	0.0106693	2.13183	10402268	Lgmn	+
5.13124	5.16446	5.27872	1.48429	1.67429	1.63705	3.09164	0.452965	0.682743	-0.796013	-3.47701	-3.41616	0.230648	0.716435	0.0174818	0	0.0670066	0.429368	-0.290981	-0.0880895	-0.188759	-0.386287	-0.436935	-0.367611	1.49e-05	3.97198	0.00568282	3.07349	0.00446923	3.22955	0.00162344	3.58428	0.000946978	3.79195	10517517	C1qa	+
3.75982	4.45313	3.51479	3.60875	4.23487	3.34345	0.848228	-0.028069	0.00216532	-0.161915	-0.776528	-0.676859	0	-0.0649681	-0.0519018	0.314063	0.305998	-0.114492	0.0230646	0.0104985	-0.161152	0.0359111	0.0844436	-0.0922294	2.3e-19	3.9513	1.08e-15	3.85809	1.2e-15	3.65061	1.96e-16	3.86166	5.18e-16	3.80976	10601456	Gm6377	+
4.24021	4.26005	3.95241	2.78197	2.95409	2.91102	0.562314	-0.0741968	0.54457	-1.12928	-1.60699	-0.846368	0	-0.0972066	0.250998	0.700373	-0.288025	1.22654	-0.453749	-0.31361	0.232427	0.218895	0.564319	0.25651	2.22e-13	3.94162	3.48e-09	3.46536	6.44e-08	2.97033	4.08e-10	3.69494	1.92e-08	3.17005	10458382	Cd14	+
4.38774	4.50062	4.30552	3.08638	3.24443	2.96197	0.764616	0.0510583	0.585038	-0.683703	-1.12	-0.54461	-0.324073	-0.169463	0.159004	-0.185707	-0.0155272	-0.318056	1.9303	1.60898	1.70145	0.171879	0.329973	0.405669	1.54e-15	3.90571	2.66e-12	3.85929	6.39e-13	3.92087	4.04e-06	2.00087	2.63e-11	3.44527	10389894	Abcc3	+
6.47982	6.52401	6.47537	2.31379	2.36252	2.22991	3.53709	1.74139	2.17251	-0.69018	-1.91711	-1.81463	1.90051	0.419269	1.31887	-0.135372	-0.0834808	0.122542	-0.0940409	-0.141166	-0.0645933	-0.137983	-0.336937	-0.0654592	2.12e-05	3.89273	0.00435207	3.18469	0.000125319	4.42967	9.7e-05	4.4975	8.48e-05	4.5777	10446282	Adgre1	+
4.60524	3.96154	3.4929	2.92822	2.41437	1.90802	0.0751815	0.144608	0.116616	-1.40355	-1.42977	-1.45777	-0.032865	0.0740194	-0.0934901	-0.0940714	-0.021605	0.0268373	0.0455642	-0.076612	-0.033176	-0.0818763	0.035706	-0.0799904	9.93e-14	3.87749	5.58e-09	3.23583	3.07e-09	3.24799	3.31e-09	3.23979	3.66e-09	3.26043	10513521	Mup19;Mup18;Mup17;Mup16;Mup15;Mup13;Mup11;Mup10;Mup9;Mup20;Mup2;Mup1	+
4.0956	4.51879	3.92225	2.83781	3.0251	2.25714	0.316005	0.511138	0.090282	-1.05088	-0.916869	-1.48445	1.1343	0.0566568	0.152687	1.49357	-0.610365	-0.451816	-0.628289	-0.466277	-0.571844	0.590932	0.573423	0.677443	1.07e-11	3.86525	8.63e-07	2.9949	1e-07	3.29899	1.3e-09	3.99825	2.57e-06	2.82885	10531415	Cxcl10	+
4.04313	4.32213	3.86019	3.015	3.21148	2.83554	1.24828	-0.15892	-0.110839	-0.110937	-1.29381	-1.39564	0.496918	0.324569	-0.0710902	-0.207679	-0.227807	-0.0927987	-0.172074	-0.302726	-0.128829	1.06003	0.225452	0	9.78e-14	3.85156	3.19e-09	3.29778	8.36e-11	3.72401	7.16e-11	3.74912	8.4e-09	3.11942	10446553	Epb41l3	+
4.06588	3.33631	3.77845	2.21338	1.7816	2.25765	-0.0198913	0.0814743	0.0151892	-1.89039	-1.87243	-1.87521	-0.0832171	0.036253	0.0459676	-0.0549254	-0.118412	0.0797634	0.044075	0	-0.0691066	0.359766	-0.0656843	-0.00552559	1.05e-12	3.83242	2.57e-07	2.90588	1.56e-07	2.93674	1.9e-07	2.91389	4.58e-07	2.80936	10523062	Alb	+
4.83411	4.67097	4.56676	2.20944	2.17513	2.02732	1.21855	0.13988	0.815083	-0.562115	-2.4382	-1.55198	1.01997	0.272214	0.686484	-0.244621	-0.017386	0.343198	-0.0488706	-0.0255341	-0.160971	-0.266558	-0.0810871	-0.328005	3.27e-09	3.81042	0.000113332	2.7544	4.43e-06	3.38689	2.53e-06	3.49241	1.37e-06	3.63917	10500335	Fcgr1;Fcgr1	+
4.47533	4.55283	4.17396	3.78522	3.95037	3.50488	0.788508	0.232337	0.976225	0.130923	-0.498076	0.0716281	-0.0294247	0.00212288	0.0691948	-0.0574775	-0.103386	0.129849	-0.0527854	-0.148774	0.0777044	-0.126459	-0.0737476	0	3.92e-20	3.79017	3.51e-17	4.0598	1.72e-18	4.0841	1.1e-18	4.11505	1.91e-18	4.1405	10349603	Il10	+
6.15263	6.30929	6.14425	2.12601	2.15776	2.0567	2.59992	1.06453	2.76329	-1.05944	-2.16556	-0.926539	0.998641	0	0.263213	-0.0666532	0.0400243	-0.0664995	-0.0566738	-0.216713	-0.253667	-0.208496	-0.114519	-0.186098	1.47e-05	3.77841	0.000500397	3.73715	0.000128165	4.18882	7.53e-05	4.33346	8.73e-05	4.32748	10590635;10598013	Ccr5	+
5.33434	5.68074	5.33382	2.75331	3.11137	2.6611	2.69907	1.49917	1.33066	-0.357206	-1.38728	-1.3319	1.82515	0.197062	0.679862	0.0559602	-0.0709095	0	0.187251	0.0114732	-0.116977	-0.127867	-0.129528	-0.0967407	6.3e-08	3.73703	5.81e-05	3.24509	8.57e-07	4.15076	1.01e-06	4.11853	5.76e-07	4.26382	10445953	Adgre4	+
4.09418	4.58935	4.24819	2.50669	2.94499	2.66193	1.00438	0.502861	0.30512	-0.590508	-1.09971	-1.31067	1.02168	0.0128388	0.339028	-0.110633	0	-0.0473137	-0.166444	-0.256053	-0.210352	2.06599	0.177969	0.360897	1.58e-10	3.70565	2.02e-06	3.04971	7.74e-08	3.5602	3.18e-08	3.71851	2.48e-05	2.63927	10419854	Slc7a8	+
4.66126	4.88356	4.4073	2.97019	3.11596	2.6366	0.959386	1.42621	0.469576	-0.442927	-0.509272	-1.24856	0.143964	0.508081	0.227652	0.0507212	0	-0.104161	-0.0304732	-0.0882587	-0.0980658	-0.289358	-0.0407433	-0.285626	3.29e-12	3.67007	5.8e-09	3.48591	4.35e-10	3.79696	3e-10	3.85141	1.69e-10	3.98439	10413928	1810011H11Rik	+
4.62531	4.7768	4.52085	2.30338	2.47835	2.22685	1.46364	0.936379	0.55605	-0.370242	-1.89185	-1.71323	0	0.24496	0.149683	-0.291771	-0.198197	-0.192158	-0.0151219	-0.0914249	-0.0543318	-0.453665	-0.381254	-0.363575	2.94e-09	3.65846	2.63e-06	3.35704	3.28e-07	3.71596	8.56e-07	3.54222	1.45e-07	3.88809	10480849	Fcna	+
3.80949	3.71407	3.07348	3.32547	3.23705	2.39879	-0.0748015	0.120234	0.0327516	-0.889605	-0.694421	-0.797661	0.0311379	-0.0188122	-0.0501542	-0.119482	-0.0257177	-0.0203228	0.154436	-0.0592198	0	-0.182694	-0.267216	-0.240314	9.68e-20	3.64364	5.6e-15	3.27233	8.11e-16	3.3149	1.65e-15	3.22799	2.74e-16	3.4898	10545742	Cd207	+
3.29617	4.08677	3.79366	2.70677	3.30961	2.73649	0.378195	0	-0.198451	-0.234507	-0.651056	-1.00992	0.0605574	0.550936	0.917892	-0.288169	-0.304779	0.439684	-0.279293	-0.312842	-0.282972	1.19792	-0.0354829	0.0644631	3.39e-15	3.60753	1.87e-09	2.81178	9.26e-12	3.37267	1.4e-12	3.61328	5.26e-10	2.91261	10492689	Pdgfc	+
3.2102	2.94041	3.72705	1.93453	1.72409	2.40102	-0.339625	-0.0645266	-0.358886	-1.76551	-1.3584	-1.75946	0.114498	0.150144	-0.226946	-0.140561	-0.242517	-0.119563	0.748338	0.673446	0.390644	-0.282508	-0.449704	-0.385062	3.5e-13	3.59729	2.16e-07	2.64365	4.03e-08	2.82376	1.75e-05	2.05207	1.06e-08	3.02864	10346882	Adam23	+
5.61778	5.70785	5.75956	1.60148	1.74485	1.7682	3.86658	1.23467	1.5663	-0.477405	-2.73449	-2.80031	0.719088	1.23861	-0.387018	-0.667311	0.0499854	0.603498	0	-0.237886	-0.529081	-0.451088	0.0775742	-0.278549	0.000166435	3.59073	0.00752267	3.17639	0.00236278	3.70456	0.00118651	3.95561	0.00142533	3.91731	10469358	Mrc1	+
5.05844	4.96654	4.45434	3.51057	3.80544	3.1967	0.250297	-0.0563517	3.0836	-0.956423	-0.958493	2.16715	0.024107	0.0914335	0	-0.146891	-0.0912299	-0.052876	-0.0845556	0.000742	-0.0695267	-0.0412011	0.0453143	-0.0304503	4.34e-09	3.57704	4.49e-08	4.12682	1.47e-08	4.26234	1.97e-08	4.21645	2.91e-08	4.17412	10565994	Art2b	+
3.11078	3.1903	2.92931	1.94825	2.16517	1.73557	0.215013	-0.937753	-0.773809	-0.880782	-1.91274	-1.97412	-0.524635	-1.04219	-1.06644	-0.0725665	0.144144	0	0.0419569	0.0396228	0.205232	0.226911	0.213459	0.218236	1.92e-13	3.55726	4.88e-10	3.39099	2.73e-07	2.48937	5e-07	2.41763	1.58e-06	2.29369	10473847	Acp2	+
3.02347	3.16951	3.09439	1.61383	1.81514	1.56453	-0.146817	-0.808764	-0.414397	-1.60573	-1.86675	-2.08538	0.0394635	0.360949	0.267397	-1.04733	-1.27621	-1.22956	-0.749806	-0.4647	-0.197806	1.01252	1.31338	1.5385	3.37e-14	3.53479	1.36e-06	2.15754	1.04e-11	3.56451	3.05e-09	2.85092	0.0110381	1.09201	10590031	Itga9	+
4.71279	4.93206	4.50254	2.76735	2.80601	2.56288	2.96169	0.161791	0.517624	1.01937	-1.89302	-1.66867	1.35512	1.64935	0.466503	-0.101457	0.0083065	0.111965	-0.20836	-0.160345	-0.030601	-0.155347	-0.200903	-0.214943	7.54e-08	3.53081	0.000660165	2.55694	2.86e-06	3.70766	1.47e-06	3.84704	1.28e-06	3.90433	10371662	Spic	+
3.9958	4.38966	4.48921	1.1361	1.35934	1.6396	1.17524	0.443619	0.531685	-1.6593	-2.32204	-2.25846	1.14438	0.279606	0.251044	-0.149728	0.0707755	-0.153321	-0.060812	-0.0551205	-0.0514321	-0.216581	-0.323405	-0.275353	7.04e-07	3.51649	0.0058199	2.27661	0.000584587	2.91238	0.000633024	2.89074	0.000288796	3.10673	10371506	Stab2	+
3.67901	3.53655	3.15712	2.95557	3.13143	2.8071	0.530868	0	0.0469704	-0.308172	-0.899192	-0.862074	0.814065	0.00186777	0.42046	-0.0753903	-0.0668864	-0.13062	-0.0790319	-0.165969	-0.0169606	0.00200367	0.0282178	0.0760608	6.19e-17	3.45973	2.62e-11	2.799	1.15e-13	3.3021	1.2e-13	3.29845	4.76e-13	3.1757	10360406	Ifi205	+
3.92538	4.27543	4.29971	2.3626	2.49906	2.60343	0.552988	0.153817	0.76686	-0.555528	-1.10548	-0.488718	0.0680084	0.0269723	0	-0.312605	-0.34616	-0.450563	-0.169363	-0.150321	0.0302954	0.149885	0.618291	0.123998	9.59e-13	3.44028	1.81e-09	3.29594	4.99e-11	3.69738	3.61e-10	3.42407	8.74e-09	3.03021	10368647	Dse	+
3.85248	3.58477	2.95806	2.50507	2.07119	1.54068	0.0263495	0.0271182	-0.00887394	-1.35642	-1.25135	-1.27022	0	-0.00491953	-0.0343933	-0.0508719	0.0271511	0.0613503	-0.00360823	-0.0172839	0.0160336	0.034184	-0.023776	-0.00889397	1.64e-12	3.39094	8.32e-08	2.76515	7.3e-08	2.7395	6.83e-08	2.75366	7.75e-08	2.75154	10513512	LOC102631971;Mup19;Gm2083;Mup18;Mup8;Mup7;Mup17;Mup16;Mup15;Mup14;Mup13;Mup12;Mup11;Mup10;Mup9;Mup2;Mup1	+
5.88696	5.9627	5.88385	1.91335	2.00145	1.97469	3.57494	1.58776	1.94374	-0.384636	-1.94145	-1.41384	2.5579	0.87738	0.981865	-0.0749645	0.178654	0.274141	-0.0657797	-0.0676975	-0.2015	-0.235024	-0.344606	-0.1869	8.53e-05	3.37608	0.019927	2.46479	0.000489059	3.81122	0.000221595	4.04883	0.000155616	4.19268	10456071	Csf1r	+
4.69691	4.68659	4.58807	3.24256	3.26435	3.03604	1.93915	1.03929	0.959845	0.337092	-0.688517	-0.169778	0.235494	-0.056325	0.0365915	0.0453668	-0.068399	-0.285264	-0.121548	-0.00688648	-0.0929589	-0.0958257	-0.00654221	-0.25464	5.61e-12	3.34957	1.12e-10	3.84717	1.57e-11	4.02185	1.9e-11	3.99289	1.79e-11	4.03809	10498367	P2ry13	+
3.45529	3.62403	3.57052	2.23581	2.43006	2.31258	1.1932	-0.153513	-0.0434852	-0.137545	-1.63437	-1.52102	0.332055	0.460766	0.0678878	-0.173329	-0.152524	0.0980845	-0.208441	-0.155801	-0.25668	0.297082	-0.195879	-0.153345	2.86e-11	3.32084	1.01e-06	2.65115	6.12e-08	3.01397	2.52e-08	3.14502	1.08e-07	2.95543	10379389	Adap2	+
2.31636	2.39659	2.22253	2.11277	2.31148	2.08724	0	-1.24786	-1.49089	-0.148664	-1.63471	-1.85184	-2.21799	-2.18924	-2.51357	-2.87512	-2.57244	-2.4972	0.690783	1.0311	1.74344	1.42691	-1.02948	-0.476867	3.17e-11	3.30349	6.4e-12	4.5481	3.28e-13	4.88942	0.0349142	1.08606	1.63e-05	2.26764	10572130	Lpl	+
1.98745	2.27442	1.75268	2.06723	2.49358	2.1191	-0.256039	-1.57891	-1.4323	-0.20676	-1.78769	-1.38651	-0.637356	-0.658977	-1.44995	0.24299	0.267001	-0.407577	0.0698504	0.179489	0.300722	0.262846	0.374793	0.283702	1.03e-07	3.29694	3e-05	3.01427	0.00339551	2.00366	0.00569106	1.84143	0.00604428	1.77956	10585956;10585970;10585972;10585974;10585976;10585978;10585980;10585982;10585984;10585986;10585988;10585990;10585992	Myo9a	+
4.57234	4.54696	4.19319	2.4143	2.37269	1.9783	1.46456	1.44856	0.57621	-0.873735	-0.666777	-1.57608	1.4285	0.706628	2.43697	-0.166167	-0.17724	0.0609222	-0.0389228	-0.0584793	-0.323225	-0.135585	0	-0.00133896	3.34e-08	3.28417	0.00593296	1.82226	1.46e-06	3.44046	1.16e-06	3.48651	2.27e-06	3.39194	10466210	Ms4a6d	+
3.28117	3.52879	3.05296	2.98746	3.1255	2.51354	0.438812	-0.345856	0.0706458	-0.199389	-0.73748	-0.434631	-0.0680175	0.982201	0.258374	-0.0951986	0.0865369	-0.172878	-0.395177	-0.346148	-0.431647	1.02418	-0.0339928	-0.000976	2.93e-12	3.28289	1.19e-07	2.69072	2.61e-09	3.14208	2.22e-10	3.47256	6.19e-08	2.75184	10423556	Cpq	+
2.75591	3.21707	3.88914	1.44911	1.41842	1.95559	0.147025	0.043642	-0.0620432	-1.69543	-1.51869	-1.72064	-0.063817	0.0291991	-0.00424242	-0.0217643	0.0102649	0.064673	0.0013361	-0.00450945	0.0190291	0.0515328	-0.0519347	-0.0263395	2.14e-11	3.24856	2.15e-06	2.46049	2.35e-06	2.42981	2.15e-06	2.44225	2.29e-06	2.45645	10538965	Fabp1	+
3.387	3.5114	3.13292	3.1248	3.12206	2.69488	0.481612	-0.0570726	0.0738206	0.0243139	-0.396167	-0.314387	0.130754	-0.0283122	-0.0376167	0.494186	0.607021	0.100447	0.0678182	-0.0892277	-0.0983744	0.328572	-0.143687	-0.0813522	1.04e-20	3.19349	7.93e-17	3.14057	4.26e-16	2.76163	3.67e-18	3.2021	1.49e-17	3.12767	10593332	Bco2	+
4.38486	4.4745	4.30095	2.56871	2.39097	2.24311	2.45404	0.386307	0.972735	0.212032	-1.51844	-1.11652	1.01012	-0.165394	0.106004	-0.351727	-0.176417	0	-0.251202	-0.236621	-0.315041	-0.436811	-0.3532	-0.396132	8.65e-08	3.16216	1.33e-05	3.07694	8.42e-07	3.5699	5.27e-07	3.66147	2.99e-07	3.78923	10392560	Abca9	+
1.99245	2.02843	1.93884	2.12164	2.01822	1.90674	-0.762882	-1.65484	-0.794082	-0.927426	-1.8127	-1.00653	-0.844653	-0.7192	-1.47975	-1.47684	-1.64823	-1.62261	-0.0356646	0.102908	0.0337534	0.73587	1.09998	0.766265	4.91e-14	3.1608	1.35e-10	3.01559	6.11e-13	3.58361	1.04e-06	1.96739	0.00314694	1.13368	10439126		+
3.48559	3.54383	3.63638	2.25122	2.19246	2.27967	0.523089	0.0200176	0.254713	-0.248968	-1.30444	-0.813005	0.0397315	0.0660725	0.0497479	-0.0726171	-0.0143108	-0.0121474	0.015677	-0.118681	-0.097796	-0.331067	-0.322938	-0.367446	1.96e-14	3.15962	2.59e-10	2.84634	5.57e-11	2.93121	4.21e-11	2.96512	5e-12	3.23867	10487823	Siglec1	+
4.29741	4.5613	4.76131	2.05894	2.06847	2.33584	2.95691	0.663361	0.0658813	0.367351	-1.36551	-1.5533	0.423779	0.813567	-0.0285897	0.16759	0.0449066	0.114323	-0.095326	-0.112	-0.120665	-0.139601	-0.073986	-0.154063	2.95e-06	3.1581	0.000319895	2.94429	9.96e-05	3.23827	3.54e-05	3.45654	3.85e-05	3.46976	10466200	Ms4a7	+
4.96931	5.12228	5.19845	2.49234	2.59837	2.40127	2.43211	1.76757	2.13784	-0.520705	-1.1798	-0.751789	0.979749	0.131718	0.22552	0.0652785	0.0815954	0	-0.107223	0.0812278	-0.147108	-0.176074	-0.0839238	-0.168981	1.2e-06	3.14946	2.7e-05	3.35134	3.88e-06	3.74804	2.34e-06	3.8547	1.83e-06	3.93999	10351509	Fcgr4	+
3.92396	4.17349	3.77862	2.15868	2.48402	1.92858	1.72347	0.0775905	0.463887	0.047492	-1.60194	-1.07247	0.147449	-0.414065	-0.481543	0.372711	0.578	0.173845	1.72957	1.35071	0.72203	-0.632734	-0.546615	-0.51565	1.17e-08	3.13489	5.62e-07	3.32394	2.02e-05	2.69971	0.00336617	1.80712	8.04e-08	3.63956	10531952	Abcg3	+
3.59272	2.98029	2.67536	2.89586	2.45187	2.34955	0.225455	0.0664206	-0.191408	-0.239477	-0.429663	-1.19292	0.589786	-0.0649767	0.355693	-0.091804	-0.0748224	0.551486	0.158769	0	-0.246608	-0.166457	-0.466299	-0.373698	5.11e-14	3.11787	5.88e-09	2.53077	7.77e-10	2.69599	1.87e-10	2.85355	1.71e-11	3.15976	10450242	C4b	+
3.13151	2.75813	4.23952	2.29454	1.92735	3.38428	-0.106141	0.718742	0.292623	-1.08262	0.0473542	-0.795951	-0.00943088	0	0.0637188	0.00483275	-0.0274234	0.0979824	0.398281	0.432252	0.640168	-0.291565	-0.183362	-0.0484629	1.65e-12	3.11022	3.82e-09	2.93779	2.3e-09	2.93076	1.14e-07	2.46565	5.89e-10	3.13035	10368495	Rspo3	+
3.72552	3.49355	2.98643	2.40382	2.26683	1.75884	0.748282	0	-0.0246506	-0.421868	-1.10708	-1.21021	0.416905	-0.0191002	-0.119667	-0.199403	-0.0792031	-0.21802	0.32966	0.250703	0.258624	0.228739	0.362872	0.604283	4.81e-11	3.10842	3.56e-07	2.67978	4.04e-08	2.93804	1.19e-06	2.49283	3.38e-06	2.37387	10385504		+
4.91183	4.85615	5.03327	2.1496	2.49147	2.14174	1.9036	2.18397	1.6558	-0.916509	-0.67962	-1.20764	1.22318	-0.138653	0.127382	-0.321329	-0.388669	-0.162229	0.054141	0.0385623	0.0338869	-0.164983	-0.0950537	-0.247075	1.58e-06	3.10741	5.59e-05	3.19337	2.04e-06	3.88808	9.8e-06	3.55514	4.3e-06	3.76638	10392808	Cd300ld	+
3.67829	3.6718	3.60823	2.54779	2.70692	2.65293	0.610798	1.09625	0	-0.42106	0.108514	-1.00297	-0.0738192	0.250184	0.158777	-0.184054	-0.278851	-0.174844	-0.257979	-0.315592	-0.271567	-0.405027	-0.323559	-0.328676	1.13e-09	3.07907	3.25e-07	3.03261	2.95e-08	3.35691	1.92e-08	3.42604	1.46e-08	3.49675	10557165	Chp2	+
3.16133	2.81479	3.42353	1.95922	1.61468	2.47321	-0.0205297	0.02495	7.72e-05	-0.997866	-0.95463	-1.03374	-0.17202	0.17918	0	0.0411181	0.324923	0.0659113	-0.0248375	-0.304239	-0.00841045	0.0129581	-0.132283	-0.039474	5.3e-13	3.07142	2.03e-08	2.57208	4.7e-08	2.43048	5.02e-09	2.68696	1.04e-08	2.6274	10402406	Serpina1c	+
3.17824	2.78142	3.1286	2.15917	2.2271	2.01947	0.265219	0.19632	-0.270367	-0.864906	-0.836172	-1.40909	0.00938272	0.214535	0.114477	-0.0731268	0	-0.00954342	-0.231335	-0.0274396	-0.151555	-0.118774	-0.128284	0.0507565	1.78e-15	3.06883	5.55e-10	2.46954	6.13e-11	2.60989	2.16e-11	2.71911	5.5e-11	2.64777	10484987	Nr1h3	+
4.12837	4.335	4.48686	1.32087	1.33975	1.40618	3.07562	0.773088	0.693907	-0.715848	-2.40894	-2.64048	0.240713	0.345147	0.560947	-0.289172	0.0973616	0.463051	-0.0887127	-0.362635	-0.0976353	-0.440324	-0.411471	-0.479428	7.25e-05	3.03995	0.00930738	2.4539	0.0045661	2.74576	0.0018375	3.01916	0.000795927	3.27991	10517508	C1qb	+
3.96265	3.98875	3.93798	2.02758	2.20267	2.03173	1.11056	0.0966072	0.995382	-0.361175	-1.42769	-0.447656	1.12704	0.0410581	0.685029	-0.00636911	-0.00402737	-0.0874219	0.0223627	-0.102776	-0.0391455	-0.118221	-0.154081	-0.101344	6.58e-10	3.03089	1.02e-05	2.40752	9.42e-08	3.05783	9.31e-08	3.06508	6.03e-08	3.14978	10607870	Tlr7	+
1.44726	1.58039	1.20973	1.64029	1.66471	1.313	-0.816727	-1.77195	-2.06545	-0.853855	-1.73792	-2.066	-0.301904	0.11265	-0.0980177	0.218149	0.213099	0.221975	0.115517	-0.096138	0	-0.0148373	0.222814	0.373332	1.31e-17	3.02788	1.84e-07	1.57166	9.57e-06	1.25816	5.52e-07	1.46944	7.93e-06	1.28213	10408600	Serpinb6a	+
1.70268	1.83241	1.61949	2.39495	2.47658	2.23825	-1.06368	-1.53737	-0.657482	-0.910119	-1.37244	-0.358641	-0.849177	-0.453997	-2.68136	0.115295	-0.716895	-0.326327	0	-0.556136	-0.496566	0.483998	0.497457	0.756696	3.08e-11	3.02735	1.17e-09	3.37224	1.51e-06	2.35337	1.1e-06	2.39496	0.00175354	1.46468	10466127	AW112010	+
3.02026	2.96917	2.90687	1.23258	1.18033	1.20295	0.86293	-0.215685	-0.317799	-1.21329	-2.25833	-2.44605	0	-0.645054	-0.376625	0.788943	0.873362	0.677358	-1.71991	-1.28845	-1.31968	-0.133576	0.204993	0.158051	1.68e-08	3.01673	7.08e-05	2.42592	0.0314731	1.30547	8.66e-08	3.52804	0.000957762	2.00887	10560624	Apoe	+
2.94904	2.98237	2.97346	1.74327	1.78591	1.81394	-0.0234327	0.0130768	-0.490627	-1.20209	-0.872137	-1.13026	0.0333567	0.634837	0.127461	-0.216328	-0.393746	-0.143601	0	-0.0932121	0.070425	-0.14502	-0.240292	-0.199203	1.51e-14	2.99224	4.87e-08	2.10945	1.87e-10	2.62589	2.1e-09	2.38226	4.18e-10	2.5695	10550574	Dmpk	+
2.33098	2.33747	2.1267	2.21478	2.31965	2.12374	-0.0241642	-0.743229	-1.02987	-0.277177	-1.12047	-1.29641	-0.0363722	-0.52398	-0.730465	0.786591	0.746724	1.32891	-0.440499	-0.656356	-0.542926	0.576534	-0.00973701	-0.112914	6.83e-15	2.99077	1.29e-10	2.67249	0.000151446	1.28815	1.94e-11	2.78881	2.75e-08	2.09093	10467139	Lipa	+
3.36524	3.37525	2.96196	2.84638	2.82347	2.33821	0.236663	0.25652	1.02622	-0.850517	-0.644061	-0.00813818	0.323191	-0.0175695	-0.115251	-0.19878	-0.0180573	0.058557	-0.0917554	-0.158777	0	-0.293571	-0.238554	-0.310515	3.33e-14	2.94897	5.08e-11	2.8883	7.87e-12	3.00451	5.64e-12	3.03526	1.38e-12	3.23263	10387985	Scimp	+
2.68386	3.28134	3.30912	0.96898	1.44538	1.81021	0.278933	-0.0851955	-0.0282564	-0.950855	-1.63187	-1.76633	0.61071	-0.065619	-0.183561	-0.113357	-0.0215702	0.221013	-0.18768	-0.131534	-0.194675	-0.0908704	-0.243041	-0.259118	1.33e-09	2.94708	6.62e-05	2.12931	3.73e-05	2.22112	8.54e-06	2.42111	8.49e-06	2.44749	10379511	Ccl2	+
2.95629	2.85854	2.72418	3.06852	2.77728	2.51034	-0.0757422	-0.076508	-0.0721998	-0.109518	-0.130865	-0.305687	0.297584	0.0841947	-0.142363	-0.000501	0.128085	0.243933	-0.100729	-0.0477428	-0.0396328	-0.169301	-0.169393	-0.230246	4.75e-16	2.94428	4.59e-12	2.73606	2.67e-12	2.69202	4.04e-13	2.87856	1.73e-13	3.00551	10455901	Slc27a6	+
3.19422	3.39989	2.97965	3.01081	3.18914	2.82612	0.662047	0.00389147	0.40747	0.381774	-0.449136	0.00567865	-0.170523	0.044899	-0.68451	1.15197	-0.392454	-0.00325251	0.173475	-0.341178	0.0402918	0	-0.212887	0.215357	3.15e-14	2.93135	8.4e-13	3.37002	2.62e-11	2.84788	1.78e-12	3.14244	3.42e-12	3.09915	10368144	Tnfaip3	+
3.60952	1.78061	3.85814	3.3321	1.42775	3.63849	0.0354924	0.292801	0.204591	-0.192426	-0.0751924	-0.138034	-0.114543	-0.0801806	-0.0681148	-0.127781	-0.0287552	-0.0697722	0.666078	0.196817	-0.0525322	-0.214169	-0.173142	-0.11856	1.13e-10	2.91989	1.67e-08	3.02871	1.19e-08	3.01654	1.71e-07	2.67098	7.48e-09	3.10972	10436095	Retnla	+
1.99452	2.31887	1.59959	2.51471	2.80884	1.95646	-0.955147	-1.10505	-0.723058	-0.745091	-0.691133	-0.0798783	-1.11976	-1.01604	-1.24272	0.756477	-0.222359	0.251683	-0.838398	-0.610045	-0.807649	0	0.0863752	0	5.2e-14	2.91539	1.54e-12	3.325	3e-07	1.9369	1.39e-11	2.95086	3.22e-08	2.17004	10395414	Agmo	+
2.99473	3.01837	2.90213	2.45807	2.47588	2.35723	0	0.229475	0.111627	-0.713554	-0.324709	-0.521415	-1.19179	-0.906939	-1.06035	-1.3491	-1.39446	-1.21741	-0.110592	0.357087	0.897357	1.55283	1.65895	1.59702	6.25e-16	2.90416	7.74e-16	3.75409	1.68e-17	4.02139	1.21e-10	2.31978	0.0003061	1.09813	10471721	Ptgs1	+
2.59256	2.66475	2.29794	2.44638	2.72164	2.3001	0.0383711	-0.13275	-0.456707	-0.346355	-0.511934	-0.918651	-0.357222	0.710164	-0.599091	0.12501	-0.334431	-0.0559311	0.254817	0	-0.102966	1.5451	0.833787	0.781894	7.12e-12	2.8919	3.93e-08	2.58595	2.55e-08	2.59235	8.66e-08	2.45328	0.000618225	1.4503	10602166	Nxt2	+
3.77286	3.91435	3.75454	1.4923	1.54493	1.47869	1.59415	0.366172	0.762469	-0.681634	-1.94476	-1.46858	0.915673	0.141241	0.990458	-0.403949	-0.528993	-0.371044	-0.576446	-0.331132	-0.452751	-0.794199	-0.60218	-0.658226	4.09e-07	2.88831	0.00284207	1.97716	9.31e-06	3.09427	8.01e-06	3.11306	2.68e-06	3.34448	10373223	Lrp1	+
2.45817	2.69518	2.40164	2.0151	2.30753	1.93354	-0.38516	-0.0291262	-0.170864	-1.10723	-0.946083	-0.838497	-0.206995	-0.216781	-0.245812	-0.248866	-0.683692	-0.425676	0.303458	0.037117	0.171255	0	0.155066	0.165233	2.13e-16	2.88135	9.92e-12	2.52505	3.6e-13	2.7546	3.25e-10	2.13125	2.03e-10	2.19509	10566050	Il18bp	+
4.70571	5.10178	4.82335	2.13787	2.65138	2.40273	1.86005	2.20804	1.8989	-0.713789	-0.460367	-0.243042	0.342793	0	0.136499	1.51571	-0.31876	-0.224003	-0.304936	-0.351126	-0.15082	-0.209024	-0.350446	-0.110308	3.44e-06	2.87884	9.07e-06	3.47737	1.92e-05	3.31282	1.02e-06	3.9061	1.47e-06	3.8604	10523156	Cxcl2	+
3.857	4.17617	3.60892	3.25291	3.54529	2.76243	0.824211	1.99278	0.286014	-0.0632682	1.20465	-0.297332	0.0854936	-0.0147195	0	2.35208	2.83249	0.431847	-0.0517521	0.140488	-0.0742145	-0.165962	-0.132666	-0.113852	4.38e-09	2.87594	1.37e-08	3.5102	0.00215535	1.66165	8.02e-09	3.52895	3.99e-09	3.67128	10346098		+
2.25412	2.43868	2.13089	2.00018	2.13769	1.93546	0.178828	-1.3634	-0.377126	-0.131477	-1.73711	-0.896227	-0.539381	-0.0881913	-0.618785	0.00272012	-0.176137	-0.173128	0.16594	0.175702	0.250136	0.530204	0.327372	0.436448	1.67e-11	2.87059	1.74e-07	2.56496	1.45e-06	2.26502	1.46e-05	1.95224	0.000167172	1.71816	10530467;10530477	Nfxl1	+
4.28889	4.06131	4.15164	1.75553	1.53866	1.55867	1.52754	1.42399	0.420557	-0.762241	-0.750414	-1.66505	1.23832	-0.150427	0.310273	-0.334717	-0.121685	-0.308603	-0.335983	-0.341055	-0.395954	0	-0.28756	-0.285859	9.9e-07	2.86005	0.000482364	2.4264	1.29e-05	3.14745	7.15e-06	3.25012	2.01e-05	3.08359	10445293	Pla2g7	+
3.63673	3.88526	3.82037	3.36885	3.53127	3.32614	2.27095	0.189493	0.188028	1.67467	-0.00397682	0.0945992	0.635819	-0.0331864	0.118552	-0.0517445	0.00832224	-0.0282564	0.077105	0.00409746	0.0785103	-0.177249	-0.0771246	-0.0401769	2.83e-08	2.85915	1.78e-07	3.35438	2.57e-08	3.61867	4.3e-08	3.54153	2.01e-08	3.69296	10548409	Klrc1	+
2.5888	2.6991	2.49229	2.29903	2.37387	2.23035	-0.0780201	0.00413609	0.0871792	-0.871955	-0.760113	-0.728847	0.13308	-0.134313	0	-0.00140905	-0.0678368	-0.123126	0.00540924	-0.104044	0.0728273	-0.511881	-0.327616	-0.517835	1.82e-15	2.83851	1.03e-10	2.44765	2.3e-11	2.51136	4.17e-11	2.45584	6.14e-13	2.89968	10470555	Gbgt1	+
3.65325	4.08184	3.60003	1.88117	2.15865	1.99747	1.61803	0.254939	0.443902	-0.0666027	-1.22003	-0.588114	0.152351	0.115677	0.230832	-0.0361233	-0.0714626	-0.166949	-0.0916147	-0.270739	-0.347869	-0.371772	-0.248226	-0.447048	2.4e-09	2.82171	8.45e-07	2.72911	1.12e-07	2.98691	4.3e-08	3.13214	2.23e-08	3.25108	10561104	Axl	+
3.11161	2.92018	2.62254	2.07095	1.83865	1.64655	0.436566	0.166205	0	-0.787599	-1.07441	-1.45389	0.0301399	-0.103499	0.224125	-0.0938816	-0.197802	-0.0159712	0.705782	0.753926	0.540524	-0.273354	-0.148907	-0.250049	1.73e-11	2.8206	4.13e-07	2.31816	8.51e-08	2.47096	7.12e-05	1.70167	3.7e-08	2.59252	10466130	Ms4a8a	+
4.30592	4.33627	3.8468	2.19644	2.34512	2.07044	1.8339	1.84496	0.666354	-0.380099	-0.402278	-1.27142	1.51854	0.676859	0.515537	0.0466013	0.179952	-0.0888057	-0.0978456	-0.0271182	0.164627	-0.221911	-0.250357	-0.255695	1.07e-07	2.80159	0.00019948	2.27985	1.21e-06	3.13758	1.01e-06	3.17028	2.43e-07	3.42615	10559486	Lair1	+
2.75734	2.27705	2.46353	1.88537	1.26577	1.24209	-0.124641	0.0102315	0.00323868	-1.91871	-1.57482	-1.29074	0.121445	0.163156	0.0742383	-0.238137	-0.07022	-0.217092	0.0823393	-0.0713901	-7.58e-05	-0.440693	-0.353132	-0.304702	5.87e-12	2.79777	8.55e-06	1.86224	5.25e-07	2.15701	2.67e-06	1.97823	1.04e-07	2.34803	10357261	Marco	+
3.72128	4.04147	3.7171	2.133	2.43794	2.05835	1.1278	0.83724	1.2842	-0.805371	-0.567815	-0.494893	0.0870047	-0.116432	-0.136653	-0.460135	-0.474098	-0.362727	0.165795	0.0493956	0	-0.0649786	0.028882	0.163435	6.75e-10	2.78799	2.14e-08	3.07355	9.13e-10	3.45051	3.75e-08	2.94646	3.51e-08	2.97574	10461558	Slc15a3	+
2.29449	2.39406	3.26774	0.527495	1.03597	1.35761	-0.137903	-0.0357547	0.214653	-2.04113	-2.03141	-1.52086	0.276436	-0.0545635	0.141028	-0.011003	-0.0833149	-0.0509691	-0.0557666	0	-0.0411482	-0.104286	0.0647535	0.00108147	5.91e-07	2.7383	0.0077579	1.69193	0.0042438	1.86132	0.00463746	1.8452	0.00578785	1.82571	10369264	Oit3	+
3.26599	3.3941	2.61332	2.96215	3.16724	1.9994	0.532181	0.174262	0.651024	-0.0823469	-0.274242	-0.0162535	-0.126945	-0.0994697	-0.0782499	0.0227485	-0.0509472	-0.184377	0.116702	0.0562448	0.0460858	-0.0506778	0.0244245	0.0325689	4.17e-16	2.73626	4.91e-14	3.00192	1.77e-14	2.97123	7.23e-14	2.82736	5.29e-14	2.89826	10346799	Icos	+
2.58422	2.80462	2.76534	1.75189	1.91254	1.70409	0	-0.129266	0.0470753	-0.808787	-1.16992	-0.832171	0.717331	0.139644	0.00523901	-0.422973	-0.321526	-0.201827	-0.558767	-0.381545	-0.506846	1.86459	0.090642	0.428161	8.55e-11	2.73596	1.35e-05	1.96638	7.48e-08	2.56922	1.97e-08	2.73617	0.000929789	1.45932	10368289	Enpp1	+
2.47731	2.39204	2.38121	1.76258	1.85656	1.74016	0.0613112	-0.447969	-0.773421	-0.243747	-0.950246	-1.41144	-0.451749	-0.481988	-0.418754	-0.557	-0.636041	-0.0843229	0.546056	0.490823	0.409949	0	-0.200333	-0.197627	6.44e-14	2.72923	2.84e-10	2.55247	1.72e-10	2.52743	2.98e-06	1.61937	4.59e-09	2.2343	10387890	Cxcl16	+
2.79787	2.86687	3.74826	2.90374	2.71686	3.92929	1.44207	0.0439191	0.128874	1.34442	-0.301541	-0.0553293	-0.160108	0	0.0232654	-0.0347238	0.0889196	0.0793057	-0.152276	-0.228985	-0.107893	-0.164673	-0.0294242	-0.163783	7.97e-13	2.72675	9.96e-12	3.2061	8.59e-12	3.11598	1.44e-12	3.32353	2.72e-12	3.27978	10576835	Cd209f	+
1.95761	2.06406	1.80139	1.36574	1.39542	1.19327	-0.533566	-1.05806	-0.510075	-1.44944	-1.8312	-1.11688	-0.808584	-0.755254	-0.257999	-0.419424	-0.210636	0	-0.243822	-0.25295	-0.129659	0.0190659	0.0644913	0.131692	1.2e-15	2.71279	2.12e-10	2.23686	1.15e-08	1.8396	1.2e-08	1.83839	4.67e-07	1.55783	10464084	Tcf7l2	+
1.97996	2.19919	2.07599	1.61847	1.56242	1.47307	-0.408613	-0.638225	-0.619121	-1.1492	-1.10852	-1.22187	-0.0659142	0.200519	-0.269936	-0.375537	-0.381595	-0.0291038	0.579634	0.594095	0.489069	0.34856	0.671744	0.642516	7.55e-16	2.67578	6.85e-09	1.86329	2.87e-10	2.08026	1.05e-05	1.26392	1.25e-05	1.26391	10408227	Hfe	+
2.9172	3.16017	2.68358	2.03729	2.25372	1.68905	0.538826	-0.00495624	0.174323	-0.341841	-1.12443	-0.542933	-0.294944	0.05616	0	1.61708	1.34748	1.06872	0.671961	0.863522	1.84599	0.592031	-0.172198	-0.367871	3.26e-12	2.67367	5.85e-09	2.53643	0.00310265	1.11241	0.00042576	1.32968	1.1e-08	2.43951	10405693	Dapk1	+
3.18757	3.68815	2.47183	3.00128	3.09759	2.33771	1.05364	0.0674534	0.511737	0.435558	-0.414419	0.1124	0.0848279	0.0475998	-0.0303092	0.55489	0.936532	0.156936	-0.0277133	-0.169329	-0.346322	-0.445927	-0.368696	-0.496504	2.52e-13	2.66963	1.89e-11	2.92998	1.11e-09	2.41457	1.13e-12	3.14514	1.77e-13	3.40107	10404840	Cd83	+
3.41498	4.10189	3.47722	2.06656	2.94035	2.31509	1.30597	0.443643	1.06264	-0.0474019	-0.496183	0.0374641	0.787085	0.0158205	0.268499	-0.115237	-0.223856	-0.0725708	0	-0.00920486	-0.00575209	-0.193662	-0.165092	-0.145304	7.21e-11	2.66833	1.99e-08	2.69555	2.26e-10	3.1899	6.63e-10	3.05767	2.32e-10	3.2207	10376513	Nlrp3	+
2.66976	2.6311	2.83568	1.964	1.99282	2.12668	-0.0248122	-0.17543	0.641468	-0.965364	-0.95693	-0.262217	0.50397	0.564373	-1.1166	0.35535	0.115925	0	1.12366	1.04857	1.63621	-0.0572672	0.409888	0.240194	1.88e-09	2.66055	2.76e-06	2.38609	9.4e-06	2.21291	0.0239031	1.10053	1.43e-05	2.1724	10525439	P2rx4	+
3.18985	3.29879	2.8542	2.42474	2.60818	2.01017	1.00247	-0.0651288	0.436995	0.271094	-0.861994	-0.20631	0.233212	0.0750747	0.101646	-0.0154333	0.0248485	-0.0670071	-0.0455551	-0.0455551	-0.191703	-0.171139	-0.240524	-0.156596	5.69e-15	2.6348	9.86e-12	2.59434	7.57e-13	2.75019	3.58e-13	2.82526	1.88e-13	2.92041	10388086	Nlrp1c-ps	+
2.55283	3.01112	2.90464	2.03246	1.98777	1.76898	-0.0578928	-0.0385275	0.128445	-0.551999	-0.620812	-0.375274	0.547725	0.174857	-0.369066	0	-0.46207	-1.06997	1.32072	1.11217	0.887336	0.294274	0.111164	0.31658	8.9e-10	2.62898	3.33e-06	2.25846	1.98e-08	2.88698	0.00601307	1.26956	9.13e-06	2.13563	10531972	Gbp8	+
2.97578	3.39606	3.60606	1.45304	1.67036	1.58896	1.38048	0.23599	0.117994	0.0154386	-1.25619	-1.54165	-0.275707	-0.144894	-0.090652	1.45406	0.23121	0.388735	-0.208739	-0.283958	-0.153744	0.580369	-0.0290837	0.0135555	1.64e-06	2.62303	8.49e-05	2.61879	0.00773698	1.75704	6.79e-05	2.66386	0.000691967	2.2601	10455752	Snx24	+
2.3624	2.47361	2.37902	1.78906	1.8205	1.72077	0	-0.28379	-0.20207	-0.493618	-1.07409	-1.11931	0.231227	0.0272937	-0.313252	-0.499474	0.00391245	-0.182042	0.440988	0.149303	0.248601	0.313063	0.141804	0.156558	9.38e-11	2.61971	2.06e-06	2.10914	2.92e-07	2.31676	2.45e-05	1.81126	1.47e-05	1.88709	10366667	Gns	+
2.56361	2.78296	2.35283	2.00106	2.25358	1.96346	0.0818214	-0.137343	-0.0325265	-0.401299	-0.750236	-0.555375	-0.210005	-0.813738	-0.555409	0.306089	-0.391365	0.292124	0.0184813	0	-0.217246	0.536586	0.827653	0.906662	2.15e-13	2.61874	2.03e-11	2.84597	3.29e-09	2.25063	8.08e-10	2.38584	7.14e-06	1.56262	10416355	Rcbtb2	+
3.31971	3.42888	3.34293	1.7652	1.93388	1.81229	0.537597	1.11406	0.545662	-0.923412	-0.327678	-0.995387	0.448779	-0.0905275	0.0791707	-0.0658836	-0.122534	0.109904	0.0179005	-0.14608	-0.0256558	-0.274459	-0.187961	-0.273087	3.36e-10	2.60867	2.95e-07	2.45467	5.51e-08	2.62665	4.63e-08	2.65176	1.17e-08	2.84565	10347335	Slc11a1	+
4.68393	4.89361	4.7329	2.29962	2.43365	2.12675	2.68613	2.10847	1.7271	0.498258	-0.545974	-0.814768	1.62023	1.75439	0.242	-0.167706	0.0379901	-0.105795	-0.31143	-0.330237	-0.117226	-0.145159	0.0149245	0.0180955	2.5e-05	2.58521	0.00204955	2.32287	5.79e-06	3.60692	2.45e-06	3.78138	8.19e-06	3.56579	10587854	Slc9a9	+
1.51379	1.8068	1.64058	1.48538	1.82042	1.52178	-0.421329	-0.731349	-1.24389	-0.537609	-1.33981	-1.4368	-0.594938	-0.301969	-0.251958	-0.00576782	0.100899	0.135851	0	-0.0591764	0.0459814	0.233104	0.157303	-0.0241165	8.91e-16	2.58326	6.55e-10	2.01441	1.2e-07	1.55447	4.29e-08	1.63586	2.62e-07	1.50936	10440993	Rcan1	+
2.98359	3.05941	3.0413	1.33262	1.43096	1.41332	1.41415	0.014575	0.319046	-0.483268	-1.91256	-1.5692	0.44571	-0.566038	0.346322	0.411965	0.417327	0.248691	0.289148	0.0798922	0	-2.17341	-3.2004	-3.37439	1.42e-06	2.57974	0.000807723	2.13487	0.0040055	1.85087	0.00119818	2.08719	7.16e-11	5.12627	10554789	Ctsc	+
2.12959	2.66732	2.06037	1.76673	2.13844	1.80187	-0.0211883	-0.323597	-0.582732	-0.505329	-0.703515	-0.734812	0.379548	1.27836	0.732832	-0.819883	-0.599752	-0.357012	-0.473942	-0.216415	-0.247557	2.02449	0.299322	0.117604	9.58e-09	2.57258	0.00795458	1.29714	5.26e-07	2.68627	4.06e-06	2.40669	0.0127663	1.28025	10423548	Sdc2	+
2.82198	3.23095	2.9026	1.0831	1.32857	1.23711	1.11695	-0.0911183	-0.141928	-0.269747	-1.57505	-1.80623	-0.164574	-0.14145	-0.0112128	1.01668	0.548954	1.20103	0	-0.185704	0.0788732	-0.360358	-0.339727	-0.34955	3.93e-08	2.5619	4.79e-05	2.20646	0.0279492	1.1785	7.56e-05	2.13633	1.01e-05	2.4506	10606355	Cysltr1	+
3.15278	3.3105	3.2323	1.96514	1.99413	1.88917	1.31465	0.332032	0.717933	-0.0312414	-1.04665	-1.05344	0.291357	0.0262885	0.634238	-0.131628	-0.219273	-0.275361	-0.0982418	-0.166597	-0.356901	-0.533466	-0.462841	-0.458068	7.01e-10	2.55179	1.44e-06	2.27338	1.61e-08	2.79942	1.7e-08	2.79792	2.41e-09	3.07546	10392815	Cd300c2	+
2.53535	2.2775	3.04509	1.5012	1.60575	2.0913	0.218246	0.0356884	-0.139197	-0.356049	-0.964956	-0.970834	0.527672	0.224396	-0.011467	0.175698	0.00718021	-0.00389719	-0.0282016	0.0195985	-0.125302	-0.173054	-0.13302	-0.203736	2.43e-09	2.53888	4.83e-05	1.92917	1.12e-05	2.11637	4.67e-06	2.22067	2.04e-06	2.34597	10583056	Mmp12;Mmp12	+
2.84626	3.18473	2.42722	2.39901	2.64975	2.10901	0.362141	0.282683	0.169038	0.102691	-0.231203	-0.210291	0.0989718	0.0468335	0.0168233	-0.0966206	-0.170615	-0.21937	-0.168309	-0.16308	-0.23312	-0.135926	-0.0155272	-0.0974145	1.47e-18	2.52349	2.27e-15	2.54845	3.95e-17	2.76487	2.62e-17	2.79083	1.74e-16	2.68562	10411633	Naip1	+
5.29625	5.21915	4.85923	2.73099	2.72354	2.28255	2.80235	2.87087	2.58143	-0.0623541	0.0623531	-0.281185	1.27543	-0.165118	-0.0808043	0.164868	-0.000822	0	-0.114452	-0.0299768	0.0140286	0.027318	-0.0755248	0.0108519	0.000208534	2.52304	7.07e-05	3.50878	2.21e-05	3.79727	1.38e-05	3.89542	1.85e-05	3.8644	10448124	Fpr1	+
2.62717	2.80356	2.69653	1.46033	1.62508	1.50956	0.241283	-0.0955424	0	-0.580041	-0.979013	-0.964551	0.0732255	-0.0405312	-0.0267162	-0.0523558	-0.155053	-0.012589	-0.0448303	-0.162007	-0.0758057	1.54679	0.395966	0.503059	5.96e-12	2.51668	1.2e-07	2.11838	4.07e-08	2.19371	3.41e-08	2.21459	0.000372614	1.3051	10474619	Fmn1	+
2.48571	2.78467	2.54363	1.54491	1.81708	1.71198	0.18918	-0.306624	0.106608	-0.177537	-1.2769	-0.604484	0.215764	0.209235	-0.54211	-0.32383	-0.653944	-0.648794	0.446031	0.169249	-0.539555	0.810758	0.70789	1.02263	1.37e-10	2.49296	5.62e-07	2.18703	5.21e-09	2.69019	8.47e-07	2.12276	0.00146505	1.3009	10420483	Phf11a	+
4.69151	4.99413	4.63681	2.68398	2.99788	2.64889	3.11896	2.26426	1.48729	0.912227	0.117105	-0.135319	3.75905	0.704648	2.40377	-0.168709	0	0.00787878	0.104511	0.154115	0.107998	-0.442639	-0.27753	-0.342513	1.04e-05	2.48145	0.0276386	1.48638	3e-07	3.82914	7.68e-07	3.65333	7e-08	4.12976	10389231	Ccl3	+
1.44914	1.81787	1.42465	2.022	2.24099	1.7656	-0.681477	-1.18693	-0.641843	-0.236498	-1.00285	-0.354827	-0.89423	-1.07306	-1.64082	0.100912	0	0.0603571	0.135787	-0.186199	-0.0391054	0.472218	0.670115	1.11777	3.6e-12	2.47078	1.95e-11	2.98941	2.2e-06	1.73295	9.33e-07	1.81655	0.00336833	1.03334	10571984	Ddx60	+
2.73302	2.48401	2.22493	2.57135	2.38792	2.08808	0.371472	0.0392837	0.164759	-0.219446	-0.382515	-0.148762	0.175792	0.0112505	0.037569	-0.0584149	-0.100423	-0.213553	0.192563	-0.121246	0.0108557	-0.12262	-0.0870524	-0.11417	1.07e-15	2.44409	4.5e-12	2.34002	1.64e-13	2.53902	9.39e-13	2.3875	2.69e-13	2.52283	10392839	Cd300e	+
3.62601	3.64213	3.42537	1.74683	1.69633	1.35094	2.27071	-0.0894155	1.20036	0.232423	-1.86718	-0.913196	0.398709	0.365416	-0.0822911	1.25247	0.40481	0.851985	0	-0.153111	-0.119567	-0.135642	0.043622	-0.210813	4.11e-06	2.44232	0.000269694	2.35399	0.00698658	1.74485	4.77e-05	2.67216	5.16e-05	2.68221	10585194	Il18	+
2.08152	2.29628	1.92408	3.02859	3.2533	3.0471	-1.47049	-0.405406	1.13263	-0.516551	0.278422	1.97982	-0.367078	0.607912	-1.39164	0.588324	-1.31541	-0.536405	0.544111	0.595204	0.441876	-0.0617833	0.512306	0.288597	0.000308206	2.43874	0.000544463	2.98875	0.000527805	3.02631	0.0177374	2.07808	0.0078158	2.35877	10409990	6720489N17Rik	+
2.24639	2.57576	2.64996	1.50368	1.61155	1.71312	0.377449	-0.414004	0.350485	-0.502031	-1.38481	-0.652051	-0.100938	-0.0201874	-0.0296092	-0.283699	0	-0.276489	-0.170693	-0.139777	-0.268565	0.427668	0.132379	0.412773	1.95e-09	2.42091	4.98e-06	2.10032	1.43e-06	2.23681	1.37e-06	2.24309	0.00011749	1.72581	10475708	Blvra	+
1.89403	2.21542	2.17186	1.41957	1.80966	1.79243	-0.121126	-0.208381	-0.440233	-0.68238	-0.907941	-0.848059	-0.563447	0.0930877	-0.538217	-0.461827	-0.480151	-0.347784	-0.284066	-0.151467	-0.337895	0.131168	0.0764923	0.00660873	2.78e-13	2.41851	1.23e-08	2.22002	5.13e-09	2.31375	5.32e-09	2.14164	1.5e-06	1.8124	10363901;10438626	Etv5	+
3.763	3.78241	3.82837	2.38927	2.7755	2.42803	2.08575	0.447028	1.69792	1.06216	-0.929627	0.211981	0.0894551	-0.0132585	-0.171209	-0.256337	-0.0514383	0.291615	0.180719	0.0430832	-0.11337	-0.158345	0.0338807	0	5.2e-07	2.39856	2.46e-07	3.19277	2.26e-07	3.16648	3.06e-07	3.12429	2.06e-07	3.20258	10545101	Hpgds	+
2.32791	2.36685	2.13091	1.87134	2.17478	1.81953	0.0291562	0	-0.264319	-0.400917	-0.414409	-0.604699	0.0476313	0.0585351	-0.00166893	-0.452289	-0.305319	-0.290991	0.571037	0.819901	0.959944	0.186822	-0.139553	-0.151945	8e-21	2.39108	1.09e-15	2.08039	1.25e-18	2.46475	7.64e-11	1.33159	1.55e-16	2.15011	10536297	Ppp1r9a	+
2.44299	2.7701	1.99697	1.48198	1.82031	1.25801	0.83089	-0.130065	-0.101517	-0.703955	-1.15866	-1.30442	-0.0290923	-0.354244	-0.338013	0.150247	-0.21344	0	-0.197321	-0.115461	-0.135442	0.626289	0.624893	1.0687	1.09e-10	2.38968	1.87e-07	2.20218	1.14e-06	1.98279	3.42e-07	2.11113	0.00223879	1.18843	10482920	Cd302	+
1.63627	1.38434	1.27934	2.2918	2.07743	1.84088	-1.28592	-0.94051	-0.212284	-0.812904	-0.574457	0.0420518	-0.594314	-1.80176	-0.715698	-0.386254	-0.705382	-1.50319	-0.201333	-0.132212	-0.134612	0.629158	0.421359	0.920978	4.36e-08	2.38235	2.74e-07	2.78893	7.66e-07	2.61662	0.000146319	1.90773	0.0364808	1.09451	10530633	Sgcb	+
1.6304	1.84239	1.6712	1.67102	1.83119	1.65882	-0.400114	-0.800318	-0.786989	-0.355912	-0.764639	-0.838656	-0.0965414	0.390698	0.112787	-0.00118923	-0.203925	0.139123	0.087081	0.0689945	0	0.834559	0.447782	0.530368	2.36e-18	2.37527	2.17e-10	1.58186	8.36e-12	1.7395	2.61e-11	1.66548	3.89e-07	1.11327	10363231	Smpdl3a	+
2.41319	2.5115	2.31853	2.14345	2.22198	1.91481	0.363462	-0.0331016	0.0280871	-0.0917954	-0.46653	-0.523545	0.219211	0.339062	0.00884294	-0.833896	-0.506156	-0.376468	0.851579	0.978737	0.792823	0.267974	-0.198466	-0.424166	2.13e-16	2.37448	1.18e-11	2.06487	5.74e-16	2.82608	9.07e-08	1.37953	1.47e-13	2.37213	10514590	Dock7	+
3.50023	3.4289	3.28451	1.14592	1.21822	1.11357	1.05035	1.05684	0.922875	-1.30141	-1.18231	-1.09417	0.880091	0.476886	0.903674	0	0.352477	0.319541	-0.334735	-0.252121	-0.179639	0.173418	-0.281071	-0.258872	6.24e-06	2.37319	0.0147081	1.52834	0.0014011	2.05788	9.73e-05	2.53739	0.000237099	2.40407	10591739	Acp5	+
2.22067	2.52738	1.99382	1.30343	1.63254	1.18063	0.223463	-0.0507097	-0.325353	-0.766713	-1.08815	-1.23088	-0.0256348	-0.0438309	-0.355521	0	-0.372737	-0.681278	0.320422	0.320054	0.642362	0.989539	0.604065	0.503473	2.93e-11	2.34947	4.97e-07	1.95141	4.74e-08	2.16108	0.000139137	1.38213	0.00219108	1.11072	10473281	Itgav	+
2.37436	2.66547	2.91346	1.38205	1.43147	2.26731	0.509411	0.0321407	0.16281	-0.205796	-0.944853	-0.559878	-0.0811038	0	0.0347333	-0.118351	0.0013051	-0.110465	-0.115602	-0.168143	-0.0411739	-0.0665421	-0.131555	-0.00226927	5.37e-11	2.34005	7.74e-08	2.18781	3.11e-08	2.24819	2.33e-08	2.28066	4.07e-08	2.23914	10379530	Ccl12	+
2.4471	2.28776	1.99447	2.61866	2.20445	1.98184	0.0748568	-0.142748	0.0703535	-0.134809	-0.401608	0.0339723	0.0465021	0.688508	0.453366	-0.104326	-0.0280662	0.0666165	-0.0423579	-0.171078	0.0277052	-0.414171	-0.319802	-0.327629	5.16e-15	2.33904	1.75e-09	1.85959	4.62e-12	2.27764	2.75e-12	2.31762	1.52e-13	2.60958	10390075	Gm11545	+
2.53797	2.91196	2.10566	2.20637	2.60719	2.22216	0.503518	0.228466	0.394365	0.106096	-0.440552	-0.174027	0.613726	-0.0772972	0.184501	-0.0301018	-0.0124478	0.00354862	-0.159862	-0.107593	0	-0.147763	-0.248852	-0.246113	4.61e-17	2.32891	4.1e-13	2.19157	5.19e-15	2.44488	1.89e-15	2.52103	7.22e-16	2.64613	10379721	Ccl4	+
2.08564	2.10158	2.59936	1.06324	1.03253	1.64353	-0.150656	0.0389924	-0.115236	-1.09463	-0.964647	-1.1561	-0.138115	-0.0133891	-0.111152	-0.0728774	-0.183501	0.167076	0.812357	0.169611	0.311389	-0.169156	-0.321056	-0.116558	1.71e-10	2.32803	4.24e-06	1.84187	6.83e-06	1.78408	0.000550557	1.3232	1.47e-06	1.95657	10438708	Masp1	+
1.78703	1.87228	1.64943	1.57503	1.6221	1.35794	0.219884	-0.890483	-0.814108	-0.201972	-1.18568	-1.21383	-0.527968	-0.672284	-0.388811	-0.105985	-0.546962	-0.136645	-0.0793433	-0.142891	0.374327	0.0241156	0.108472	0.142747	1.38e-12	2.325	4.02e-09	2.17366	4.64e-08	1.90717	1.78e-06	1.59327	3.32e-06	1.55219	10535739	Usp12	+
4.36772	4.23549	4.08427	1.2559	1.26268	1.09178	2.67498	1.56414	1.35302	-0.338728	-1.26163	-1.54056	1.42429	0.374161	0.962395	-0.434604	-0.432195	0.321303	0.192172	0.356115	0.345607	-0.091208	0	-0.221574	0.000552518	2.30777	0.0329213	1.79602	0.000839814	2.89814	0.00531051	2.41834	0.00123986	2.82057	10596148	Trf	+
3.1033	3.28936	3.15084	0.998112	1.0793	0.903668	0.915661	0.499134	0.878616	-0.997276	-1.30373	-1.28403	0	-0.0942268	-0.188417	-0.223782	-0.301219	-0.327822	0.01789	-0.120189	-0.211577	-0.0680904	-0.248598	-0.219641	2.75e-06	2.3027	0.000249917	2.18164	8.83e-05	2.3717	0.000254141	2.19205	0.000183259	2.2662	10489246	Mafb	+
2.02361	2.35165	1.90485	1.66074	1.74552	1.31368	0.0217066	-0.326136	-0.122872	-0.531842	-1.1199	-0.720483	-0.0318913	0.551341	-0.488668	-0.310594	-0.782133	-0.223902	0.23921	0	0.180207	0.377565	0.162845	0.517753	1.58e-11	2.29993	7.48e-07	1.82308	5.48e-09	2.27222	2.52e-06	1.69354	2.88e-05	1.48062	10491106	Pld1	+
4.03516	4.06303	3.66706	2.35241	2.57578	1.96054	1.4461	1.79075	1.49367	-0.252438	0.477253	-0.0481257	1.64425	0.311846	1.10983	-0.2237	-0.336553	-0.464097	-0.376417	-0.338146	0.566885	-0.459528	-0.453938	-0.506946	4.08e-07	2.29113	0.000108046	2.08702	9.91e-09	3.45045	7.19e-08	3.15822	5.32e-09	3.58247	10519983	Fgl2	+
2.55953	2.68223	2.6722	1.39603	1.55646	1.41361	0.591287	0.417219	0.171309	-0.699544	-0.80269	-1.08445	0.267685	0	0.0472822	-0.704443	-0.463138	0.0901194	0.0201478	-0.0765538	-0.100107	0.999599	0.823813	0.673473	7.14e-10	2.28116	3.34e-06	1.94169	4.01e-08	2.40583	6.91e-07	2.09885	0.00243905	1.21438	10431424	Plxnb2	+
2.31687	2.63144	2.31092	1.69745	1.92646	1.79191	0.853682	0.0458789	-0.174545	0.0627627	-0.66661	-1.11847	-0.371681	-0.285274	-0.402631	0	0.141019	0.242158	0.169316	0.167296	0.266926	0.242809	0.0342565	-0.0583868	5.97e-11	2.27873	3.82e-09	2.46571	2.74e-07	1.98479	5.92e-07	1.91133	1.78e-07	2.03962	10488507	Abhd12	+
2.08702	2.08451	1.87969	1.69386	1.70179	1.39229	-0.213878	-0.178432	-0.186031	-0.700161	-0.730734	-0.821693	-0.263045	-0.0982351	-0.240758	-0.31315	-0.290368	-0.218017	0.0637283	0.104466	-0.168467	0.129866	0.00176287	-0.0347462	2.29e-13	2.27835	3.42e-09	2.00721	8.03e-10	2.08037	2.28e-08	1.80662	3.96e-08	1.77423	10593927	Scamp5	+
2.63372	2.87997	2.76466	1.30441	1.65938	1.56038	0.223694	0.0736818	0.468564	-0.533759	-0.795779	-0.26402	0.105763	0	-0.102321	0.388453	0.589843	0.190687	-0.230979	0.0549684	-0.174454	-0.288308	0.0702167	0.0206847	1.03e-11	2.27169	1.87e-08	2.13261	8.57e-07	1.74409	3.62e-09	2.25057	7.68e-09	2.19956	10436892	Itsn1	+
2.17641	2.32397	2.91661	0.938431	1.08546	1.59797	-0.0286815	0.495493	0.0222237	-1.26233	-0.677335	-1.11794	0.21746	-0.123061	0.0595846	0.0516336	-0.189115	0.000854969	0.114637	-0.00127053	-0.278606	-0.226793	-0.262023	-0.335932	0.00335811	2.2679	0.0137909	1.78848	0.0089811	1.88535	0.0106672	1.89489	0.0108666	2.11473	10576772;10576774	Clec4g	+
1.88002	1.63628	1.73481	1.89008	1.61503	1.60006	-0.29779	-0.79622	0.00451851	-0.485868	-1.25083	-0.367208	-0.440743	-0.694471	-0.588357	0.219006	0.164419	-0.0770993	-0.171409	-0.555824	0.279982	-0.662945	-0.736383	0.00997496	1.02e-11	2.25828	3.25e-09	2.30057	2.88e-06	1.62394	1.79e-07	1.87513	7.43e-09	2.18916	10533198	Oas2	+
2.14577	2.45816	2.11143	1.56157	1.8846	1.41776	0.527641	-0.690408	0.340164	-0.0264645	-1.59977	-0.434646	-0.472471	0.396084	1.41397	-0.879998	-0.72042	-1.01758	-0.502496	-0.316854	-0.291314	1.28323	0.297434	0.405267	4.75e-07	2.24379	0.00411364	1.48402	6.34e-07	2.80255	2.1e-05	2.3001	0.0203165	1.2679	10467842	Got1	+
4.14622	4.17347	3.95045	1.40612	1.43902	0.990082	2.80189	1.59156	1.13257	-0.0551262	-1.08304	-1.70927	0.0553646	0.232025	0.129788	-0.392403	-0.509636	0	-0.0649214	-0.534088	-0.349452	-0.00884008	-0.323093	-0.20565	0.000874068	2.2378	0.0031254	2.54517	0.000686019	2.98491	0.000639411	3.00038	0.00120165	2.86342	10572897	Hmox1	+
2.36605	2.86981	2.44492	2.08746	2.64581	2.04171	0.64087	0.321557	0.307884	0.202375	-0.319082	-0.0852308	0.304929	0.433443	-0.533473	0	-0.0732822	0.0669136	-0.375668	-0.627918	-0.885035	-0.299183	-0.174067	-0.0545301	4.34e-12	2.23123	8.21e-10	2.34099	1.87e-10	2.41141	3.85e-13	3.03883	3.95e-11	2.58522	10452633	Tgif1	+
2.48919	2.39481	2.45219	1.88975	1.98365	1.83286	0.0352006	-0.0105319	0.769268	-0.618603	-0.545923	0.0484967	0.116478	-0.0466838	0.349228	-0.0473332	-0.0363593	0	-0.102636	0.0794263	-0.136083	-0.200562	-0.208853	-0.0928559	1.84e-12	2.22742	8.49e-09	2.03407	7.95e-10	2.20164	6.11e-10	2.22684	2.23e-10	2.34117	10379731	Wfdc18	+
2.08786	1.98997	1.88301	2.29844	2.24023	2.06806	-0.183182	0.0620556	-0.356026	-0.067976	0.0194664	-0.109665	-0.779609	-0.641655	-1.32581	-0.0052042	0.0967169	0.0135698	0	-0.102349	0.124968	-1.54842	-1.07355	-1.50825	8.47e-18	2.20048	5.73e-18	3.01029	3.1e-14	2.05957	1.98e-14	2.08706	4.7e-21	3.47134	10399973	Hdac9	+
2.75888	2.97329	2.63381	1.91636	2.14428	1.7499	0.591223	1.10312	0.157735	-0.241286	0.18741	-0.804439	0.967155	-0.0473795	-0.0858612	-0.0447502	-0.449067	-0.489689	-0.0585427	0.133981	0.256535	0.453758	0.140012	0.268991	1.37e-08	2.19713	4.68e-06	2.08478	2.55e-08	2.69059	1.04e-06	2.2521	5.43e-06	2.07517	10369413	Sgpl1	+
2.76574	3.00693	2.57986	2.17474	2.49203	2.03382	0.869071	0.842768	0.464435	-0.0206561	0.0206561	-0.229579	1.22076	0.124409	0.464658	0.0689597	0	0.0118937	-0.0534134	-0.111793	-0.101912	-0.0939865	-0.0654507	-0.0763426	6.81e-14	2.1844	1.62e-09	1.90558	7.89e-13	2.4819	2.19e-13	2.59789	3.3e-13	2.58744	10548345	Klrk1;Klrk1	+
1.06802	1.36631	1.16161	1.65062	2.03256	1.7227	-0.909007	-1.02507	-0.660798	-0.557858	-0.707378	-0.235119	-0.316544	-0.494254	-0.702181	0.117186	-0.273586	0.205134	-0.02038	0.00185108	0.270856	0.178618	0.545112	0.50141	3.5e-13	2.18284	2.01e-09	2.00463	7.92e-07	1.48406	1.93e-06	1.4162	0.000150188	1.09193	10490632	Helz2	+
2.20814	2.98357	2.24473	2.39445	3.36268	2.42401	-0.60196	0.900687	0.854915	-0.637743	1.16442	0.950852	-1.28525	0.206258	1.17914	0.0474439	-0.943282	-1.9413	-1.2184	-2.4144	-0.548925	0	-0.409577	-0.0611005	0.000212529	2.1644	0.000552361	2.56955	5.24e-06	3.54864	5.81e-07	3.99684	0.000283241	2.75982	10365286	Eid3	+
2.20624	2.36458	2.35313	1.08245	1.18946	1.23064	0.488173	-0.148396	0.301641	-0.793592	-1.35167	-1.03317	-0.347365	-0.110998	0.510052	-0.325777	-0.358872	-0.348603	0	-0.0348964	0.0219445	0.705674	0.134748	0.212782	9.86e-09	2.16059	5.85e-05	1.72052	2.44e-06	2.08217	4.76e-05	1.74207	0.00110277	1.38668	10381445	Tmem106a	+
3.27065	3.50213	3.16882	1.67016	1.81995	1.54511	0.969894	1.08234	1.01914	-0.561564	-0.163297	-0.296711	0.16947	-0.0530086	0	-0.116015	-0.0920553	-0.211879	0.0732985	-0.107883	-0.0912361	0.699538	0.575015	0.852416	4.18e-08	2.1545	4.39e-07	2.45731	7.89e-08	2.63612	1.82e-07	2.53808	9.71e-05	1.78715	10537410	Tbxas1	+
2.67779	2.89188	2.73499	1.36741	1.56752	1.3408	0.909275	0.46117	0.904604	-0.772223	-1.09483	-0.730464	0.549576	0.287971	1.30431	-0.280148	-0.438002	-0.278765	-0.511603	-0.0129602	0	0.0556972	-0.194547	-0.0834215	9.25e-06	2.15048	0.0200506	1.38278	6.38e-05	2.42904	0.000201403	2.27159	0.000457961	2.17082	10372091;10555576	Anapc15	+
2.58852	2.56203	2.27919	1.9336	1.92326	1.63166	0.902323	0.526566	-0.23422	0.0340529	-0.0340529	-1.15042	0.150203	1.00177	1.61822	-0.684888	-0.403915	-0.606549	-0.0148525	-0.0295482	0.0908556	0.0459666	-0.395161	-0.668164	9.87e-09	2.14567	0.00279455	1.22965	8.53e-09	2.71816	1.34e-06	2.13756	6.81e-08	2.49216	10403303	Akr1c13	+
1.6795	1.78358	1.78997	0.86336	1.18186	1.25469	-0.0410481	-0.49189	-0.640094	-0.676365	-1.0186	-1.44356	-0.649361	-0.456885	-0.610426	-0.0058012	0.0782013	0.0225105	0.0135956	0	0.0881453	-0.591656	-0.185329	-0.261854	8.21e-15	2.14409	5.25e-11	1.99772	1.22e-07	1.39386	1.31e-07	1.39158	6.51e-10	1.77177	10508651	Sdc3	+
4.30024	4.40971	3.79978	1.5649	1.71109	1.1494	2.44552	1.8278	1.98119	-0.356022	-0.929261	-0.873548	0.266539	0.219082	0.198339	-0.242798	-0.0408001	0	0.124235	0.0490899	-0.200638	-0.330036	-0.412024	-0.406894	0.000305682	2.13991	0.000609239	2.59453	0.000155553	2.91705	0.000226463	2.83163	4.26e-05	3.20551	10445758	Treml4	+
5.45216	5.40146	5.29575	2.15334	2.1054	1.92744	3.43577	3.01774	3.21635	0.181926	-0.234954	-0.0994587	0.648723	2.61275	1.52375	-0.265233	0	-0.0344992	-0.220318	0.0047164	0.0502038	1.54674	-0.0421877	0.446929	0.00448872	2.13636	0.028396	2.12751	0.000153678	3.8225	0.000175287	3.77772	0.0023082	3.0721	10543239	Tfec	+
2.36914	2.22239	2.41998	1.02519	0.863079	0.973315	0.63929	-0.18071	0.107245	-0.71623	-1.29822	-1.41974	-0.293423	-0.429381	-0.749579	-0.760524	-1.00554	-0.769437	-1.10911	-1.05028	-0.992743	0	0.199417	0.0391769	4.05e-07	2.12358	2.65e-05	2.13631	1.77e-06	2.49068	3.93e-07	2.69623	0.00172231	1.56598	10531407	Cxcl9	+
2.04293	2.82984	2.13176	1.70641	2.10942	1.44467	0.149211	0.151211	0.0671048	-0.192509	-0.310006	-0.311043	0.306853	0.117546	0.106122	-0.0938945	0.057714	-0.159576	-0.00829792	0	-0.223573	-0.264304	-0.142287	-0.0690985	1.21e-13	2.11851	2.01e-09	1.86733	4.8e-11	2.10942	4.21e-11	2.12146	2.01e-11	2.20273	10498371	P2ry12	+
1.78829	3.0571	1.87278	1.41701	2.14667	1.32365	0.329232	-0.0740247	0.0247407	-0.102896	-0.663539	-0.604817	0.220999	-0.0726886	0.137075	-0.0983825	-0.0519719	0.0197954	0.00701237	-0.204284	-0.0181408	-0.236282	-0.111489	-0.0560088	5.79e-11	2.11613	3.5e-07	1.83912	5.93e-08	1.97777	4.56e-08	2.00605	2.74e-08	2.06884	10349661	Rab7b	+
1.64203	1.77645	1.17884	1.79313	2.0387	1.37295	-0.339235	-0.960134	-0.449273	-0.28552	-0.595916	-0.2622	-0.709135	-0.290976	0.0745206	0.0820818	0.161895	-0.179044	0.180976	0.109732	-0.103828	0.152215	0.304659	0	3.91e-15	2.11573	3.92e-11	1.94221	1.9e-09	1.61204	3.6e-09	1.57139	1.71e-08	1.48139	10512030	3110043O21Rik	+
2.41939	2.43883	1.83228	2.05461	2.08218	1.50709	0	0.0345774	0.27688	-0.303679	-0.300456	-0.00420237	-0.284115	-0.172663	-0.141307	0.25919	-0.149306	1.11503	0.184957	-0.047092	0.175369	-0.392517	0.266848	0.0910954	3.08e-11	2.10521	2.81e-09	2.25509	1.34e-06	1.64743	4.37e-08	1.95132	1.45e-08	2.06725	10582582		+
2.42011	2.4395	1.83152	2.05455	2.08273	1.50613	0	0.0341959	0.278835	-0.30308	-0.300568	-0.00355959	-0.290281	-0.17296	-0.138762	0.258395	-0.151693	1.11182	0.185099	-0.0499568	0.176465	-0.392711	0.267623	0.0770602	3.15e-11	2.10479	2.82e-09	2.25642	1.33e-06	1.64958	4.41e-08	1.95189	1.4e-08	2.07177	10582584		+
3.47362	3.37046	3.02101	2.3411	2.39362	2.03738	1.47292	0.825772	0.906612	0.810438	-0.0295715	0.0295715	0.682595	-0.190052	-0.493924	1.57719	0.155109	-0.505345	-0.352616	0	-0.032577	-0.522757	-0.383477	-0.630886	9.14e-07	2.10357	5.19e-07	2.77332	8.36e-06	2.36388	1.71e-07	2.90126	1.39e-08	3.28523	10361091	Atf3	+
3.88558	3.83293	3.19868	2.25059	2.14705	1.64179	1.20101	1.43311	2.07394	-0.209141	-0.313743	0.209141	0.422544	0	0.419745	-0.153844	-0.00124359	-0.0195971	-0.0695949	-0.171186	0.165599	-0.111029	-0.213561	-0.132332	3.3e-06	2.09372	7.81e-06	2.54534	7.21e-07	2.88433	9.16e-07	2.85117	4.4e-07	2.97841	10607868	Tlr8	+
1.84927	1.86516	1.83624	1.45848	1.57024	1.49201	0.0528078	-0.149404	-0.2837	-0.484006	-0.673371	-0.866112	-0.348983	0	-1.43931	-0.0351429	-0.211598	0.029316	0.445331	0.331364	0.260507	0.620213	0.668785	0.617891	5.27e-13	2.0792	4.11e-11	2.27467	1.17e-08	1.75104	3.1e-06	1.33283	0.000177259	1.04294	10578361	Asah1	+
1.36091	1.3753	1.10645	1.76528	1.79944	1.38192	-0.25781	-1.20079	-0.50707	-0.0892048	-1.13671	-0.450707	-0.366078	-0.242722	-0.553464	0.316395	-0.0231943	0.52676	0.251389	0.149479	0.407091	-0.192486	0	0.0714016	9.1e-10	2.07193	1.66e-06	1.8523	0.00108646	1.19156	0.00104727	1.19556	5.47e-05	1.50524	10501051	Cept1	+
2.22323	2.35053	1.79313	1.592	1.69815	1.34722	0.296676	-0.0180717	0.052206	-0.394803	-0.700615	-0.620028	0.478508	0.0100875	0	-0.460967	-0.376976	-0.254389	-0.335813	-0.375345	-0.396352	-0.441652	-0.357953	-0.471604	6.76e-14	2.06482	7.79e-09	1.67118	4.62e-12	2.19816	4.13e-12	2.20321	2.83e-12	2.25778	10573128	Tbc1d9	+
1.99458	2.00976	1.70318	2.29817	2.41366	2.03661	-0.0719109	-0.639975	0.464279	0.0429602	-0.49257	0.812507	-0.167655	0	-0.718109	0.912932	1.00707	1.05755	0.384837	0.357628	0.107848	0.519132	0.521787	0.520767	5.78e-08	2.05678	4.69e-07	2.37125	0.0130062	1.08348	5.07e-05	1.79255	0.000413988	1.55543	10395273	Gdap10	+
2.23739	2.57146	2.25497	1.96914	2.35344	1.7963	0.311808	0.146921	0.635893	-0.323462	-0.159929	0.237684	0.376569	0.0837836	0.21127	-0.0942149	0.0477767	-0.0577016	-0.0702329	0	-0.000172	-0.177649	-0.155225	-0.135134	2.81e-17	2.05563	1.6e-13	1.97324	1.16e-15	2.23183	1.26e-15	2.22058	3.64e-16	2.35312	10593628	Rab39	+
3.4598	3.3396	3.05432	1.85421	1.62402	1.41096	2.04927	1.17562	0.492695	0.682896	-0.714179	-1.26942	0.354237	-0.04495	0.929662	0.051578	-0.0962272	-0.0440659	-0.172777	-0.191583	0	-0.139126	-0.115772	-0.162023	6.63e-06	2.05434	0.000256629	2.04417	1.58e-05	2.48672	8.17e-06	2.57861	8.63e-06	2.59613	10541581	Clec4b1	+
1.99516	2.16006	1.9101	1.73897	1.93641	1.64047	0.0367579	-0.140066	0.0484123	-0.155	-0.392047	-0.331798	-0.00828838	0.0665646	-0.293617	-0.160313	0	-0.210601	0.47956	0.321111	0.416427	0.227256	0.213278	0.335917	7.16e-16	2.05248	2.65e-12	1.97531	5.17e-13	2.0205	1.45e-09	1.49116	1.84e-10	1.63804	10599976	Mtm1	+
4.28026	4.28453	4.27175	2.01639	1.93639	1.84405	2.42657	1.83297	2.21963	0.134685	-0.159508	-0.134685	2.51521	0.404503	1.7233	-0.303535	0.0408297	-0.26277	-0.0897546	-0.164751	-0.164321	-0.19928	-0.227653	-0.070931	0.00018225	2.05228	0.0223468	1.55789	6.6e-06	3.28072	7.71e-06	3.24517	8.01e-06	3.27152	10548375	Clec7a	+
2.13716	2.45317	2.13145	1.78316	2.10887	1.70356	0.773644	0	0.225108	0.18895	-0.716016	-0.401667	0.671651	-1.01424	0.724685	-2.10424	-2.56969	-2.02228	0.807755	0.823307	0.385269	0.386296	0.803489	0.880118	5.87e-10	2.04122	4.42e-07	1.92553	3.51e-16	4.28496	0.000106225	1.38078	0.000145484	1.36293	10394593	Fam49a	+
1.89187	1.99736	1.8274	1.3797	1.33659	1.11189	0.211261	0.0206165	-0.480174	-0.539055	-0.55141	-1.32096	0.342536	0.781127	0.0213099	-0.510913	-1.02018	-0.581892	0.173133	0.0555582	-0.234624	0.839756	-0.0597391	-0.00228787	1.87e-09	2.03409	0.000927399	1.20914	2.24e-08	2.29513	2.42e-05	1.59278	0.000365174	1.33156	10419744	Slc7a7	+
1.6839	1.64677	1.59269	1.15093	1.32242	1.14388	-0.28545	-0.222454	-0.458369	-0.70394	-0.83676	-1.12841	-0.339143	-0.0128221	-0.0396881	-0.0738783	-0.120066	-0.23126	-0.0464726	-0.0836124	0.129061	0	0.25328	0.199871	4.89e-15	2.02933	3.63e-09	1.55398	1.71e-09	1.56517	1.61e-08	1.42377	2.06e-07	1.27238	10470446	Rxra	+
2.15491	2.25718	2.21778	1.61265	1.7832	1.62934	0.0829291	0.494588	0.228869	-0.638204	-0.160917	-0.481558	0.724947	0.180337	-0.432718	-2.41332	-2.26811	-1.78783	-1.3034	-1.67322	-1.77423	0.212093	0.0395379	0.574349	8.75e-08	2.02156	5.75e-05	1.78499	6.88e-13	4.09893	3.98e-11	3.52613	0.000175228	1.66718	10582985	Casp1	+
1.88597	2.15719	1.54731	1.13373	1.55717	0.902453	-0.328255	-0.0400515	-0.234807	-0.915245	-0.454282	-0.948768	-0.0287476	-0.0799861	-0.0199308	0.0944686	0.254163	0.597518	0.14518	-0.0389619	0.0877671	0.340507	0.0445218	-0.091753	1.39e-12	2.01754	1.84e-07	1.57352	1.76e-05	1.21525	5.95e-07	1.46597	1.04e-06	1.43288	10357239	Tmem37	+
2.27463	2.22626	2.02303	2.14291	2.10587	1.70975	0	0.0935163	0.427709	-0.145972	-0.0262713	0.138958	-0.220612	0.0115824	0.10004	-0.177263	-0.261281	-0.370741	-0.349406	-0.260373	-0.162979	1.69596	0.201965	0.379394	4.72e-13	1.99908	8.71e-11	2.11674	2.37e-12	2.35017	2.57e-12	2.33799	1.96e-06	1.3213	10418927	Bmpr1a	+
2.10333	2.25773	1.6951	1.59547	2.04196	1.2717	-0.316997	1.23563	-0.568829	-0.985655	0.648493	-1.03927	-0.417267	-0.750719	-0.391486	-0.238783	-0.399882	-0.106482	-0.136413	-0.359151	-0.252424	0.483272	0.223383	0.174888	1.84e-05	1.99865	6.57e-05	2.34737	0.000371363	2.07593	0.000364249	2.07688	0.00967567	1.5337	10587503	Sh3bgrl2	+
1.90873	1.97985	1.61911	1.5534	1.61487	1.2597	0.137226	-0.519108	0.0861597	-0.352178	-0.965185	-0.406613	-0.186218	-0.593768	-0.299427	0.0985422	-0.400207	-0.152026	0	0.0418682	0.181474	-0.110521	-0.0419731	-0.0689087	3.88e-11	1.99256	1.16e-08	2.01575	8.06e-08	1.80717	1.23e-06	1.58149	2.38e-07	1.72974	10419240	Ddhd1	+
4.28127	4.33332	3.82991	1.96059	2.31271	1.76798	2.33271	2.21391	2.21289	0.077467	-0.210149	-0.077467	1.03319	0.471032	1.19862	0.10828	0.277044	-0.147194	-0.0577002	-0.0717936	-0.144773	-0.274234	-0.0888338	-0.173419	6.7e-05	1.9894	0.000503848	2.18002	4.82e-06	3.00158	1.77e-06	3.17238	1.23e-06	3.25979	10534935	Pilrb1	+
2.24899	2.11852	2.0491	1.48199	1.32846	1.24978	0.663743	-0.181093	0	-0.162807	-0.990422	-0.784668	-0.0228004	-0.0532408	-0.588962	0.276058	-0.189595	-0.174166	0.0724006	0.0732994	-0.130001	1.07167	0.350391	0.228573	1.04e-09	1.98868	2.77e-07	1.96781	1.63e-06	1.77537	2.36e-06	1.74091	0.000753307	1.19593	10345423	Plekhb2	+
1.56583	1.55602	1.38718	1.39892	1.49269	1.23139	-0.44395	-0.348283	-0.476272	-0.724154	-0.550558	-0.739974	0.402575	-0.433486	-0.361908	0.237169	0.0814276	0.58628	0.251774	0	0.352826	0.850217	0.1312	0.302004	1.7e-12	1.98587	1.67e-07	1.56961	4.5e-05	1.13705	1.08e-05	1.23714	0.000263265	1.01086	10589889	Glb1	+
2.15947	2.84965	1.38832	1.95599	2.33539	0.806996	0.0395527	0.0457134	-0.0265207	-0.177084	-0.0895729	-0.169905	0.00996542	-0.0566616	-0.0196357	-0.144123	-0.00798416	-0.128197	0	-0.276473	0.0380063	-0.175467	-0.12004	-0.137856	5.36e-12	1.97894	4.41e-09	1.93808	1.06e-09	2.0094	1.28e-09	1.99546	7.43e-10	2.06042	10536738	Hyal5	+
0.702519	1.07577	0.539119	1.72955	2.16168	1.20094	-0.94294	-1.35722	-1.0822	-0.228521	-0.457418	-0.383074	-0.571499	-0.753591	-1.07562	-0.169992	-0.0490351	-0.0878105	0	0.113048	-0.284494	0.116747	0.167797	0.396222	5.16e-10	1.97683	7.05e-08	2.03517	0.000102488	1.33721	0.000160821	1.29208	0.00328686	1.00801	10579744	Large	+
4.56299	4.85067	4.48597	1.72309	2.03478	1.6838	2.65665	2.44123	2.90227	-0.3864	-0.218823	0.124978	2.00328	0.296827	1.13345	0	0.0735221	-0.155063	-0.0422025	-0.24898	0.0482221	-0.195339	-0.254207	-0.198296	0.00140413	1.97023	0.0083585	2.07903	7.8e-05	3.25073	5.73e-05	3.30454	3.57e-05	3.4395	10534927	Pilra	+
2.88943	2.75193	2.73722	1.11744	1.19157	1.11275	0.91233	0.475611	1.1139	-0.502342	-1.52935	-0.462315	0.152023	-0.0456581	0	-0.343917	-0.39233	-0.313142	-0.346747	-0.255164	-0.136991	0.46221	0.182984	0.199847	3.73e-06	1.96542	0.000195518	1.93127	1.4e-05	2.31652	2.8e-05	2.21302	0.00123084	1.68504	10415844	Ctsb	+
3.02031	3.17093	3.05191	1.20397	1.18523	1.22909	0.79958	0.812523	1.20947	-0.519723	-0.530866	-0.693106	0.20957	0.29279	0.528018	0.136894	-0.251672	-0.254167	0.122796	-0.0666261	-0.0144653	-0.233758	0	-0.0168624	9.37e-06	1.96393	0.000869921	1.80011	4.79e-05	2.26656	0.000113538	2.12967	6.7e-05	2.22711	10603860	Cfp	+
3.01571	3.14938	2.80229	1.93007	2.29439	1.95018	1.03292	0.493954	1.88717	-0.114169	-0.566915	0.667818	1.08658	-0.0436492	0.0404291	0	0.0502305	-0.0624852	-0.0164547	-0.102686	0.0331645	0.0186548	-0.0569844	-0.297696	3.38e-08	1.95687	6.43e-07	2.16255	1.96e-08	2.52775	1.63e-08	2.55233	9.67e-09	2.63568	10486061	Rasgrp1	+
2.53335	0.923811	2.82361	1.98797	0.509982	2.34897	0.00709248	0.154258	0.0811315	-0.386726	-0.226747	-0.226386	0.00807142	0	-0.014863	-0.0260978	0.0692844	-0.0500207	-0.0500207	-0.169221	0.0944653	-0.135345	-0.18229	-0.246018	1.36e-09	1.95418	7.4e-07	1.85688	6.24e-07	1.85689	4.18e-07	1.8962	1e-07	2.0425	10379535	Ccl8	+
2.45009	2.50192	1.96446	1.67604	2.11271	1.02693	0.180313	0.378478	0	-0.229992	-0.011991	-0.148147	0.117524	-0.125667	-0.534041	0.85378	0.163114	0.085918	0.0119128	0.425887	0.226564	-0.648939	-0.719291	-0.539303	3.33e-11	1.92725	1.44e-09	2.13609	5.36e-07	1.58775	8.82e-08	1.7339	5.98e-12	2.5912	10456357	Pmaip1	+
3.56892	3.91544	3.55959	1.7456	2.05585	1.8473	2.15993	1.23929	1.38353	0.528743	0.0828462	-0.207854	0.990203	1.4353	1.19021	-0.325566	-0.494088	-0.551902	-0.295029	-0.234858	0	0.989514	0.338436	0.442625	5.36e-06	1.9177	0.0019046	1.57688	1.78e-08	3.2393	1.31e-07	2.95874	3.57e-05	2.19192	10457733	B4galt6	+
4.26611	4.5135	4.29966	1.22883	1.42592	1.25012	2.77728	2.69429	1.23193	-0.0183182	0.0183172	-1.10865	1.95729	0.177362	0.474262	0.00226212	0.112208	-0.182633	0	0.0480347	-0.0226631	-0.224569	-0.187297	-0.050971	0.00394482	1.89822	0.0209944	1.96105	0.00110829	2.85341	0.0012572	2.82223	0.000715541	2.98497	10541555	Clec4a1	+
1.64959	2.00774	1.71553	1.50071	1.87697	1.48779	0.310223	-0.237042	0	0.0157695	-0.678958	-0.548596	-0.316122	-0.9676	-0.213704	1.03056	0.269203	0.150173	-2.21946	-2.07766	-2.11826	-0.0785303	-0.597726	-0.594008	6.87e-10	1.89615	6.85e-09	2.20553	0.000230519	1.22307	1.1e-15	3.84485	1.18e-08	2.12981	10354003	Mgat4a	+
1.08507	1.34949	1.0008	1.20301	1.42677	1.12201	-0.325526	-1.04189	-0.651171	-0.389954	-1.1587	-0.613671	-0.138329	0.0896492	-0.639169	0	0.0630512	0.0235043	-0.244139	-0.195652	-0.141637	0.10493	0.231518	0.175484	4.89e-08	1.89468	0.000324683	1.42714	0.00330023	1.16901	0.000489086	1.39167	0.0117964	1.02721	10399605	Adam17	+
3.29579	3.3744	3.09641	2.13799	2.07176	1.85347	1.90305	1.58924	0.987095	0.326235	-0.0189018	-0.306873	0.424418	0.475255	0.9508	0.132576	0.153423	1.03142	-0.786231	-0.810629	-0.915534	0.720914	-0.114061	0	3.54e-07	1.89166	9.12e-06	2.02148	1.84e-06	2.19917	6.35e-11	3.47577	2.94e-07	2.43602	10555118	Pak1	+
0.816155	1.40148	2.64452	0.457767	1.03901	2.30681	-0.00168419	-0.554095	-0.339513	-0.411405	-0.708834	-0.575189	-0.223912	0.197123	-0.460083	-0.261406	-0.313382	-0.416574	-0.382662	0.00820684	0.119349	0.250847	0.614379	0.295775	4.18e-08	1.87608	5.42e-05	1.60658	1.14e-05	1.77474	0.000110209	1.52932	0.00803641	1.05729	10453747	Colec12	+
3.28816	3.27835	3.23642	1.52257	1.56496	1.34543	1.73789	1.08632	1.0697	-0.123337	-0.238722	-0.545813	1.27779	1.05484	0.387249	-0.218988	-0.156525	-0.179297	-0.344154	-0.422427	-0.308179	0.0415921	0	-0.0975981	7.44e-06	1.87497	0.00363181	1.46602	2.14e-06	2.55758	6.31e-07	2.7309	8.41e-06	2.39132	10367822	Rab32	+
1.65032	1.86699	1.4951	1.96902	2.06859	1.51665	-0.728457	0.217812	-0.308948	-0.403454	0.535457	0.018147	0.0639367	0.116008	-0.0563569	0	-0.452549	-1.02683	0.591987	0.766491	0.868852	0.245456	0.472512	0.659335	4.53e-12	1.87269	1.54e-08	1.71992	1.19e-11	2.25424	0.000153356	1.01867	3.56e-06	1.30201	10366595	4932442E05Rik	+
4.16676	4.0588	3.99412	1.33874	1.23799	1.25096	2.77504	1.74545	2.10346	0.146385	-0.937684	-0.993978	1.72863	0.138516	0.555766	-0.0165577	0.0278873	0.0815225	0	-0.151452	0.00867224	-0.227657	-0.313285	-0.389761	0.00213012	1.86812	0.0166014	1.86693	0.000983364	2.64361	0.000693917	2.72216	0.00024393	2.9848	10593050	Il10ra	+
3.18336	3.24139	2.83604	1.82738	2.06314	1.58702	1.48323	0.856287	1.05903	0.417582	-0.04603	-0.144437	1.24486	0.742443	0.241478	-0.390396	-0.544276	-0.36242	-0.770619	-0.748981	-0.477417	0	0.120827	0.165026	1.73e-07	1.85211	4.83e-05	1.71346	1.54e-09	2.88875	2.27e-10	3.12206	1.69e-07	2.3611	10411611	Naip5	+
2.17244	1.9899	1.72185	1.74985	1.63709	1.42579	0.354382	0.150439	-0.0611582	0.0446739	-0.116041	-0.749264	0.082077	-0.231159	-0.0581322	-0.0130596	0.314055	-0.123352	0.0668764	-0.0446968	0.00831985	0.432515	0.382738	0.493273	2.05e-09	1.84565	3.75e-07	1.85189	1.22e-06	1.72361	7.25e-07	1.77265	8.71e-05	1.34665	10577882	Hgsnat	+
1.87438	1.9971	1.50236	1.79924	1.82627	1.48332	-0.0242763	-0.0846515	0	-0.122732	-0.177257	-0.154819	-0.110586	0.04105	-0.123686	-0.17214	0.0606346	0.0458727	-0.170986	-0.138763	0.0410314	0.631704	0.26788	0.327357	4.96e-18	1.84107	1.64e-14	1.81152	8.15e-15	1.76899	2.42e-15	1.83668	2.6e-11	1.33813	10412882	Thrb	+
3.12871	3.38381	2.95807	1.54703	1.71465	1.23179	2.09225	0.919437	1.10238	0.286568	-0.754091	-0.727934	1.30458	0.241346	0.799423	-0.0147867	-0.107385	-0.326609	0.0824857	-0.0275145	-0.0814137	-0.230416	-0.278153	-0.167029	2.47e-05	1.84091	0.0037968	1.54556	1.09e-05	2.47694	2.7e-05	2.33616	7.41e-06	2.55254	10382438	Cd300a	+
2.29316	1.55356	1.60334	2.76803	1.90932	2.05503	0.492324	0.0487881	0.467488	0.538362	-0.3137	-0.00641632	0.699237	0.0314126	-0.019999	0	-0.0939908	0.0873046	-0.0435271	-0.0889387	-0.0536246	0.184378	-0.020833	-0.0763464	4.8e-12	1.82593	3.82e-09	1.79352	9.44e-11	2.03264	4.57e-11	2.09244	1.88e-10	2.00134	10466314		+
4.11446	4.57256	4.31241	1.50602	1.61421	1.47931	2.20183	2.40706	2.35083	-0.0655384	0.0150719	-0.258426	1.34541	0.301146	0.411099	0.148133	-0.0900836	0.178608	-0.0095892	-0.0975141	-0.0661778	-0.0947533	-0.185747	-0.195744	0.00118498	1.82469	0.00194502	2.24727	0.000128983	2.85427	6.25e-05	2.99092	4.32e-05	3.09191	10562720	Siglece	+
3.33028	3.64232	3.60745	1.21659	1.51242	1.42331	2.88185	0.24555	2.31966	0.3441	-1.92907	-0.0315867	0.489402	-0.164216	0.153677	-0.241757	-0.259761	-0.564051	0.0347803	0	-0.375101	-0.35898	-0.16875	-0.480965	0.00236245	1.81698	0.00292565	2.29577	0.000371181	2.81058	0.00109219	2.56883	0.000445064	2.79163	10392825;10392834	Cd300ld5;Cd300ld4;Cd300ld3	+
1.91931	2.45654	2.06145	1.32614	1.76985	1.3909	1.29608	0.0614986	-0.259761	0.434659	-0.422035	-1.02951	0.200006	1.36589	-0.574038	0.0641389	0	-0.657764	-0.390885	0.182975	-0.33846	0.0535469	-0.401905	-0.143185	3.76e-05	1.80721	0.00557293	1.49008	0.000269033	2.01857	0.000293111	2.00282	0.000365351	1.98455	10354203		+
2.52638	2.77309	1.84862	1.48324	1.63606	0.661445	0.661631	0.298251	0.549735	-0.303107	-0.58187	-0.511655	0.456287	0.291871	0.0496736	0.0813665	-0.0407228	0.037715	0.651191	-0.00806189	0.835763	-0.149143	-0.205036	-0.21033	4.33e-07	1.80264	0.000231152	1.55553	3.26e-05	1.79536	0.00165092	1.32851	5.6e-06	2.00964	10398039	Serpina3f;Serpina3g	+
1.41508	1.78605	1.48169	1.42184	1.92718	1.63886	-0.0757551	-0.0483179	-0.658057	0.0863409	0.0547118	-0.470064	-0.0360031	-0.51221	0.521076	0.00581956	-0.405468	0.71692	-0.185963	-0.212988	-0.105369	-0.0583589	-0.153256	-0.126254	1.49e-05	1.79697	0.000283072	1.62083	0.000486675	1.50603	3.12e-05	1.77989	0.000145138	1.72441	10413574;10413596	Sfmbt1	+
2.15959	1.00008	2.40683	1.20558	0.14564	1.58936	-0.130681	0.185738	0.0536304	-0.942641	-0.551079	-0.834447	0	0.00253153	-0.063653	0.0032773	0.257228	0.56428	-0.016077	0.0695591	-0.132281	-0.163155	-0.170773	-0.151772	1.12e-05	1.78776	0.00353779	1.43822	0.0237613	1.14292	0.00408498	1.44411	0.00183249	1.57975	10499189	Fcrls	+
2.62556	2.8459	2.7233	1.35002	1.48011	1.4697	1.61252	0.284819	1.05712	0.344156	-1.13424	-0.3568	0.736622	0.0439568	0.697129	-1.07974	-0.832781	-1.23804	-0.757375	-0.678195	-0.67154	0.104524	-0.00377369	0	4.58e-05	1.78117	0.0032006	1.58986	1.44e-07	3.13262	1.54e-06	2.7848	0.00024156	2.04885	10359161	Soat1	+
1.92861	2.07273	2.04608	1.52947	1.71825	1.43707	0.349568	0.171856	0.433188	-0.195242	-0.453195	-0.227209	-0.00880861	0.0479727	0.0768471	-0.136706	-0.0225429	0.0479727	-0.0733881	0.00618982	-0.0506244	-0.206285	-0.18035	-0.230403	1.83e-14	1.77554	2.55e-11	1.75003	3.52e-12	1.82579	3.23e-12	1.82797	4.04e-13	1.99438	10411958	Rnf180	+
3.79969	3.9761	3.49182	1.69984	1.75997	1.31709	2.21262	2.02179	1.77491	-0.134736	-0.0309668	-0.391911	1.37888	-0.0580769	1.10273	-0.0436745	-0.0110602	0.0831833	0.0902658	-0.258222	-0.223916	-0.273393	0.0207004	0.341703	0.000374559	1.76547	0.00300005	1.86624	4.6e-05	2.6646	1.91e-05	2.80471	5.52e-05	2.64441	10547621	Apobec1	+
3.02855	3.37755	2.55757	2.22132	2.5098	1.69586	0.701102	2.18774	1.14631	-0.472384	1.28887	-0.0456033	0.39832	-0.0447731	-1.12998	-0.82334	-1.4934	-0.658151	-0.466683	0	0.60838	-0.391551	-0.544824	-0.370278	0.0103522	1.7641	0.00186911	2.82392	0.000136077	3.55674	0.00633722	2.51788	0.00123329	3.00066	10586076		+
3.0301	3.37667	2.5534	2.21398	2.5086	1.69496	0.695353	2.18766	1.14692	-0.478658	1.28689	-0.0445828	0.390233	-0.0453052	-1.12759	-0.815391	-1.49884	-0.662638	-0.479896	0	0.611278	-0.402188	-0.539522	-0.35831	0.0102806	1.76402	0.00185058	2.82384	0.00013488	3.55524	0.0062606	2.51916	0.00123879	2.99629	10578405		+
3.02901	3.38088	2.55548	2.20934	2.50607	1.6909	0.704616	2.19115	1.14799	-0.478646	1.28266	-0.0525465	0.389932	-0.0443211	-1.1304	-0.819418	-1.49639	-0.664297	-0.467257	0	0.613874	-0.404156	-0.545924	-0.37376	0.0103823	1.76274	0.00186406	2.82354	0.000136077	3.55531	0.0064216	2.51307	0.0012149	3.00323	10415081		+
3.31764	3.31312	3.10652	1.43739	1.35592	0.99189	2.55466	0.822103	1.06132	0.500363	-0.907385	-1.08206	2.15067	0.408975	0.353762	-0.681188	-1.21365	-0.9551	0.658286	0.2438	0.421476	-0.0328131	0	0.0854478	0.000502473	1.76225	0.0443941	1.28261	2.99e-06	3.20372	0.00578696	1.81256	0.000734082	2.2362	10444298	H2-Eb1	+
1.64056	1.59081	1.3591	1.52573	1.53687	1.31958	0.225335	-0.0371342	-0.745498	0.060205	-0.164918	-0.927994	0.630473	-1.13928	0.321077	-0.91133	-1.07785	-0.158233	-1.2503	-1.03876	-1.71869	0.119111	0.549897	0.539539	3.01e-07	1.76044	0.000130015	1.55802	3.56e-07	2.21125	1.46e-09	2.83136	0.008097	1.09259	10514275	Hacd4	+
3.02693	3.37766	2.56072	2.2216	2.51078	1.69203	0.712929	2.18817	1.15032	-0.470448	1.29145	-0.0417175	0.387293	-0.0496612	-1.1224	-0.818388	-1.50972	-0.668219	-0.466665	0	0.613076	-0.393344	-0.543089	-0.362991	0.0102904	1.75983	0.00179617	2.82654	0.00012657	3.56373	0.00620878	2.51615	0.0012005	2.99809	10520121		+
3.93424	4.07312	3.81677	1.39164	1.51386	1.31506	1.8651	2.13724	2.17288	-0.502612	-0.050272	-0.129293	1.85405	0.160852	0.69554	0.0909081	-0.131955	-0.10664	0.136439	-0.124419	0.136555	-0.155459	-0.0426407	-0.0753193	0.00109109	1.75861	0.00983654	1.77063	0.000132678	2.72334	0.000214825	2.62459	0.000116739	2.76525	10557591	Itgal	+
1.19193	1.2865	1.06241	1.57803	1.74422	1.41043	-0.521574	-0.249389	-0.641151	-0.285122	-0.186304	-0.370344	-0.737197	-0.401969	-0.51298	-0.336746	-0.00535631	0.0475564	0.131224	0.145425	0.316663	0.298548	0.233169	0.32894	8.21e-15	1.75457	8.09e-13	1.92964	3.2e-10	1.4771	6.07e-08	1.18115	3.59e-07	1.09203	10507894	Rragc	+
1.7679	1.66623	1.53192	1.57617	1.59421	1.36875	0.354668	0.129868	-0.37707	-0.0639772	-0.195562	-0.866331	-0.0493059	-1.35694	-0.389861	-0.237802	0.12203	0.381071	0.231918	0.245789	0.00591278	0.0400238	-0.274085	-0.216269	7.45e-09	1.75393	1.49e-08	2.1829	1.7e-05	1.49576	3.58e-05	1.42299	1.4e-06	1.73431	10420155	Dhrs1	+
2.82591	2.92729	2.70597	1.84357	1.98131	1.68505	1.11618	1.6112	0.738424	-0.129244	0.324755	-0.203983	0.346262	-0.324358	-0.476063	0.140239	-0.45936	-0.440835	0	-0.198176	0.0212412	0.557661	-0.061419	-0.0796995	3.26e-07	1.75196	4.5e-08	2.47957	1.26e-08	2.5815	7.27e-08	2.38716	4.93e-07	2.18934	10349782	Nuak2	+
2.63332	2.91016	2.39098	1.78878	2.08964	1.62363	1.16732	0.53915	0.842681	0.263765	0.0392852	0.073071	0	-0.278857	0.496501	-0.0531116	0.435577	-0.360236	0.0167141	-0.0156798	-0.409802	0.270378	0.455329	0.532932	6.79e-08	1.75187	1.44e-07	2.16687	5.48e-08	2.23201	1.43e-08	2.37568	3.72e-06	1.81987	10384782	Vrk2	+
1.43885	2.22291	1.39115	1.32104	2.15867	0.917388	-0.0639019	-0.118056	-0.137028	-0.224853	-0.252734	-0.221034	0.0383468	-0.0976996	-0.0822191	1.24798	0.365015	0.0841293	0.209772	0.0277376	-0.0372205	-0.174739	-0.315846	-0.181691	9.31e-11	1.7446	1.42e-07	1.62219	0.000331896	1.00929	4.64e-07	1.50824	1.3e-08	1.79909	10518726	Slc25a33	+
1.87585	1.80683	1.91361	1.25683	1.28475	1.24782	0.363964	-0.142005	0.14574	-0.367698	-0.836982	-0.173737	0.0202484	-0.57182	0.0809898	0.119028	0.471664	0.253212	0	0.217208	0.00902176	-0.12579	-0.340768	-0.395438	2.76e-11	1.73273	1.27e-08	1.72114	3.39e-06	1.28298	1.94e-07	1.48887	1.87e-09	1.85161	10478594	Ctsa	+
2.55459	2.8111	2.66699	2.1592	2.29814	2.1044	0.907721	0.893361	1.3021	0.161802	0.4329	0.607924	-0.797269	-0.123038	-0.590016	1.71214	1.42606	0.121581	-1.19803	-0.848625	-0.668411	-1.32588	-1.54641	-1.57229	3.27e-08	1.71477	4.24e-11	2.93584	0.000163882	1.34581	5.67e-13	3.33742	8.06e-15	3.91393	10560481	Fosb;Fosb	+
1.96237	1.86396	1.67295	1.18249	1.13658	1.00655	0.615014	-0.00720596	0.0269146	-0.224985	-1.0437	-0.78087	-0.274667	-0.405201	0.660546	0.0593901	0.395596	0.602747	0.0675917	0	-0.119119	0.512943	0.179666	0.399346	5.29e-08	1.70662	5.42e-05	1.47726	0.0018926	1.11824	4.72e-05	1.48799	0.00230476	1.10683	10364375	Cstb	+
2.30374	2.72795	2.25874	1.45013	1.92762	1.41426	0.962642	0.556735	0.710045	0.137017	-0.373414	-0.137016	-0.147682	-0.539446	-1.05016	0.497699	-0.911374	0	0.094944	0.0178528	0.298502	0.367696	-0.119415	0.0549164	1.88e-06	1.7044	6.88e-08	2.59283	2.07e-06	2.15163	2.18e-05	1.87664	1.88e-05	1.91267	10492428	Tiparp	+
2.82398	3.38462	3.04329	1.58001	1.97808	1.54388	1.89156	0.95891	1.34959	0.428087	-0.363409	-0.131758	0.620429	0.37609	0.12189	-0.0953097	-0.22996	-0.0323091	-0.0923338	-0.155673	-0.153215	0	-0.00933981	0.0303569	2.34e-06	1.70348	8.66e-06	2.01951	1.2e-07	2.5115	1.1e-07	2.52605	4.15e-07	2.3853	10411622	Naip7;Naip6	+
3.82404	3.88043	3.55338	1.59091	1.68668	1.28738	1.80534	2.29978	1.58159	-0.103659	0.230757	-0.127702	0.60615	0.344568	0.128243	0	-0.160815	-0.0962257	-0.0580373	-0.288428	0.0420008	-0.324988	-0.542771	-0.390169	0.000254612	1.68945	0.000134636	2.27748	9.26e-06	2.72282	8e-06	2.73863	1.3e-06	3.05645	10573939	Lpcat2	+
1.41815	1.41796	1.3421	1.42351	1.48673	1.49158	0.018281	-0.896939	0.132118	-0.0106687	-1.03275	0.2411	0.0319128	-0.0211649	-0.193229	-1.29018	-1.33115	-1.38434	0.292706	-0.163878	0.194533	-0.186338	0.0388136	0.194668	3.02e-07	1.68815	0.000134119	1.49083	9.28e-10	2.76523	0.000672623	1.32222	0.000324717	1.41429	10566366	Trim30d	+
2.40049	2.72547	2.26597	1.66234	1.80857	1.40951	1.04396	0.444125	1.02041	-0.171851	-0.199681	0.08144	0.420438	0.119958	0.1918	-0.097702	-0.178008	-0.097693	-0.0979872	0	-0.0618172	-0.516629	-0.222131	-0.299628	2.89e-10	1.67566	1.75e-08	1.80133	1.22e-10	2.16986	2.87e-10	2.09866	1.25e-11	2.39152	10370339	Trpm2	+
1.85996	1.64287	1.8177	1.12668	0.727005	1.15823	-0.0287132	0.0659351	0.278865	-1.13931	-0.408665	-0.454384	-0.0466871	0.105045	-0.0207839	-0.0768185	-0.0338278	-0.0489044	-0.0358372	0.00574112	0.135546	0.00788498	-0.0306873	-0.0375948	1.12e-07	1.66979	0.000173987	1.37622	9.98e-05	1.44192	0.000231729	1.35359	0.000151652	1.40887	10513529	Mup3	+
2.70436	2.92092	2.31808	2.05252	2.04873	1.52839	1.44169	0.490963	0.7932	0.695943	0.0479541	0.0958419	0.790637	0.266832	0.255508	0	0.133476	-0.0901737	-0.0765948	-0.0114493	-0.111549	-0.133584	-0.310934	-0.306517	2.83e-08	1.6679	6.67e-07	1.82451	6.2e-09	2.24773	2.75e-09	2.3287	5.39e-10	2.51251	10496771	Mcoln2	+
2.47233	2.50201	2.0576	1.41923	1.66501	1.13407	0.530316	0.355065	0.906765	-0.13398	-0.435559	0.111148	0.257314	0.0509493	0.0475538	0.00549817	-0.0216799	-0.158759	-0.142721	-0.101934	-0.0847585	-0.0210099	-0.144712	-0.021148	1.95e-05	1.65275	3.2e-05	1.75644	1e-05	1.93336	4.26e-06	1.98485	6.01e-05	1.93733	10435704;10435712	Cd80	+
3.0241	3.17107	3.00322	1.494	1.62012	1.461	1.7714	1.36014	1.37422	0.107488	-0.376924	-0.367204	1.35428	1.47444	0.284479	1.03586	1.10735	0.621138	0.113696	-0.112133	0.361935	-0.0685415	-1.33853	-1.33162	0.0004846	1.65073	0.0298401	1.25785	0.0352306	1.37414	0.000470039	2.17442	2.48e-06	3.20848	10484888;10484894	Ptprj	+
1.55629	1.72398	1.56583	1.46515	1.64573	1.36357	-0.0254445	-0.132429	0.120527	-0.0948992	-0.262127	-0.17096	0.0886335	0.144622	0.264021	-0.0189371	-0.297719	0.167207	0	0.203764	-0.189271	-0.0547385	0.141831	-0.293428	1.74e-13	1.64765	6.97e-09	1.38767	1.21e-10	1.60324	2.92e-10	1.54859	1.17e-10	1.6222	10382470	Tmem104	+
4.31822	4.39494	4.27314	1.28063	1.41424	1.3274	3.08615	2.64635	2.93054	-0.326856	-0.684596	-0.451541	1.41009	0.584148	0.486503	0.0301204	-0.444922	-0.732679	-0.30835	-0.550766	-0.0478387	-0.684021	-0.55362	0.0465102	0.0215537	1.63475	0.0309456	2.00785	0.000800503	3.21725	0.00107486	3.13708	0.000828225	3.2318	10387536	Cd68	+
1.41172	1.55387	1.30752	1.4668	1.61575	1.29316	-0.0654769	-0.665659	0.245228	-0.139523	-0.768807	0.25481	0.0235791	0.214379	0.627791	0.00476265	0.403138	0	0.0343409	-0.0448637	-0.0829663	0.261265	0.137407	-0.018045	2.53e-08	1.63137	0.000482364	1.15289	0.000106011	1.3055	1.57e-05	1.47263	0.000104229	1.31459	10407709	Mtr	+
1.92288	2.13141	1.84132	1.57317	1.7708	1.39111	1.03479	-0.369654	0.645678	0.550698	-0.958068	-0.0604696	-0.193014	0.0201197	-0.221502	1.7843	-0.561102	0	-1.03465	-0.799955	0.0108452	-0.733223	-0.679786	-0.837981	7.29e-05	1.63129	0.000253959	1.90325	0.00880417	1.36405	9.29e-06	2.3797	4.03e-06	2.52211	10427035	Nr4a1	+
1.93518	2.53991	2.24111	1.29647	1.87961	1.61777	0.754936	0.472024	0.288069	0.36111	-0.120498	-0.0229716	0.718307	0.318739	0.477494	-0.0345001	-0.0836587	-0.138727	0.0402217	-0.0654845	-0.159865	-0.137233	-0.140513	-0.270479	2.53e-11	1.62956	1.94e-07	1.41349	3.74e-11	2.00397	5.15e-11	1.98005	1.39e-11	2.10108	10360306	Slamf8	+
1.73909	2.561	1.74511	1.30765	1.79281	1.10245	0.328773	0.0514436	0.45835	0.023953	-0.319039	0.0071249	0.404611	-0.0448012	-0.133627	-0.143671	-0.1206	-0.0581069	0.00558615	-0.100611	0.0143008	-0.0738888	-0.100458	-0.0664868	3.74e-12	1.61625	1.75e-09	1.63262	5.89e-11	1.81548	1.93e-10	1.73493	1.15e-10	1.7883	10452879	Nlrc4	+
1.90164	2.0988	1.37808	1.93305	2.0892	1.36813	0.0224984	0.696437	-0.0560865	-0.0133202	0.605241	-0.156362	0.092679	-0.7865	-0.0758703	-0.343209	0.141681	-0.799903	0.12609	0.0958083	-0.0264597	0.669874	0.177011	-0.0280695	1.1e-07	1.61175	1.23e-07	2.05138	2.28e-07	2.12863	7.09e-06	1.72967	0.000129402	1.52188	10354647;10354649	Pgap1	+
2.05819	2.41178	2.19131	0.853056	1.31358	1.03344	1.01459	0.53438	-0.000614	0.111396	-0.257561	-1.17901	0.492953	0	0.00265169	-0.0832524	-0.393811	-0.00106287	-1.34513	-1.32893	-0.696836	-0.8035	-0.851919	-0.845151	0.000534021	1.60636	0.0115679	1.47836	0.0027174	1.80294	8.43e-06	2.76719	5.73e-05	2.47708	10510215	Zfp991	+
2.51411	2.24253	2.07693	2.03659	2.26592	1.77722	1.7468	0.462732	0.00392151	1.12204	-0.0223527	-0.00632191	0.0656805	0.00392151	0.12235	0	-0.163045	0.123513	-0.00581312	-0.252101	-0.21831	0.619056	0.0523071	-0.0216846	8.63e-09	1.60108	6.21e-09	2.08824	1.56e-09	2.1654	3.15e-10	2.31096	2.63e-08	1.93566	10351781	Kcnj10	+
1.59402	2.30858	1.4402	1.72718	1.72657	1.33615	0.33026	0.097856	0.0697708	-0.074079	0.0942221	0.0119333	-0.0148468	0.17735	-0.314609	-0.362527	-0.36521	-0.227554	0.445009	0.551298	0.230936	0.458123	0.0748219	0.547043	9.6e-11	1.60046	5.31e-09	1.73949	8.9e-11	2.00721	2.08e-06	1.2797	1.2e-06	1.32879	10499160	Cd1d1	+
1.49599	1.4404	1.20999	1.36288	1.36373	1.06058	0.11303	-0.192851	-0.316439	-0.140139	-0.47538	-0.654625	-0.408656	0.220782	0.00255776	-0.0369854	-0.513718	0.108128	0.101174	0	-0.184606	0.0515337	0.142236	0.230703	9.62e-07	1.59999	0.000374124	1.38403	0.00019194	1.46978	0.000562917	1.35007	0.00276201	1.18077	10493435	Gba	+
2.15469	2.2767	1.28692	1.82017	1.9473	1.3105	0.377962	0.390793	0.257915	0.00828123	0.264441	-0.0979209	0.0299563	0.00458956	0.0151415	-0.23711	0.0299563	-0.151923	-0.105994	0.0281353	-0.0173922	-0.110267	0	-0.0600114	3.53e-13	1.59913	1.8e-11	1.78282	9.95e-13	1.91907	3.45e-12	1.83113	3.14e-12	1.85614	10516518	Tlr12	+
1.77786	1.95164	1.51148	1.76757	1.92531	1.41658	0.290156	-0.143262	0.496069	0.16329	-0.303989	0.265752	-0.460411	-0.341156	-0.48803	-0.558654	-0.387852	-0.383491	-0.434787	-0.133757	-0.549497	0.892233	-0.294787	-0.273676	3.5e-09	1.59707	1.28e-09	2.15494	5.44e-10	2.16841	1.24e-09	2.09775	4.62e-07	1.61715	10523563	Cds1	+
1.70654	1.74121	1.38349	1.40164	1.52508	1.38052	0.243795	-0.038497	-0.105424	0.111426	-0.30917	-0.326595	-0.0661724	-0.054343	-0.0281801	-0.134229	-0.141921	0.0730491	0.0128207	-0.0372262	0.0751433	-0.24361	-0.175048	-0.266994	5.02e-14	1.59382	2.88e-11	1.57265	1.25e-11	1.59078	3.59e-11	1.50617	5.99e-13	1.75163	10495193;10495197	Kcna2	+
2.38735	2.50632	1.71239	0.842814	1.23119	0.903413	0.694915	0.347071	0.841676	-0.309328	-1.07876	-0.428789	0.542377	-0.0392294	0.461186	-0.458034	-0.175017	-0.254292	-0.146237	-0.533586	-0.489718	0.721963	-0.239133	-0.235508	6.44e-06	1.58611	0.00259551	1.2758	1.94e-05	1.89303	8.19e-06	1.98709	0.000510257	1.51481	10587871	Paqr9	+
2.44243	1.53327	1.80358	1.36604	0.403746	0.505988	0.67923	0.35752	0.0903196	-0.403746	-0.882361	-1.28012	-0.23219	0.110574	0.14019	0	-0.136629	-0.0831699	0.0368476	-0.0585876	-0.0172415	-0.333022	-0.180554	-0.265994	3.31e-06	1.58237	0.00107984	1.33632	0.000637113	1.41578	0.00106372	1.3555	0.000141416	1.60237	10593167		+
2.59104	2.45442	2.34184	1.318	1.06302	1.15374	0.963298	0.814897	0.621572	-0.206824	-0.148348	-0.600837	0.703513	0.836223	0.516341	-0.00961971	0	-0.0367374	-0.0691071	-0.205961	-0.00916862	0.414774	0.713697	0.732562	1.94e-05	1.57972	0.0113343	1.13498	8.65e-05	1.8358	4.31e-05	1.91509	0.0108403	1.2	10585874	Hexa	+
1.97186	1.99475	1.55664	1.41057	1.38401	1.15734	0.53984	0.258712	-0.0337906	0.0870991	-0.209611	-0.596786	-0.0153618	0.140071	-0.0445008	-0.139197	-0.0313544	-0.00804615	0.0399571	-0.127456	-0.159443	-0.0604425	-0.0752988	-0.385525	7.44e-09	1.57162	1.42e-06	1.55246	4.32e-07	1.63873	3.32e-07	1.66151	1.22e-07	1.75295	10480842	Tmem141	+
3.37416	2.78825	3.34379	1.09645	0.630277	0.702534	0.564993	2.04412	1.8082	-1.6991	0.123444	-0.253798	-0.108185	-0.237258	-0.0688863	-0.0845118	0.170708	-0.21031	0.0121727	-0.280956	-0.0820956	0.145659	0.0863543	0.0806069	0.00254537	1.55793	0.00156267	2.12735	0.00289796	2.03061	0.00200512	2.1062	0.00650355	1.88504	10351546	Apoa2	+
2.16316	2.43352	2.2801	1.29221	1.57079	1.23838	1.12097	0.578436	0.168058	0.382184	0.0697851	-0.665297	0.132087	0.0657473	0.0119829	-0.228727	-0.0777516	0.221337	-0.19504	0.00511122	-0.259717	-0.238593	0	-0.071291	2.95e-08	1.554	3.62e-07	1.75975	9.03e-08	1.85807	2.4e-08	1.97957	4.73e-08	1.93299	10574976	Pla2g15	+
1.43945	1.53056	1.23553	1.45061	1.47635	1.15166	-0.117442	-0.365285	-0.123217	-0.030961	-0.230277	-0.168737	0.344144	0.0802593	-0.33678	-0.140905	-0.0298552	-0.253167	0.0100045	0.112111	0.214229	0.102817	0.00778389	0.368584	5.65e-18	1.55334	5.38e-13	1.35148	5.2e-15	1.522	9.9e-13	1.26858	3.54e-12	1.22096	10567086	Cyp2r1	+
1.08517	1.41482	1.03316	1.68341	2.06804	1.60522	-0.430095	-0.0779448	-0.347464	-0.00661659	0.407573	0.0758848	-0.460562	0.0840702	0	0.47888	-0.182823	-0.19457	0.0191765	0.109381	0.0925617	0.195854	0.247929	0.410507	2.56e-08	1.54475	1.54e-06	1.60713	8.98e-06	1.44781	1.36e-05	1.40793	0.000185058	1.19687	10400095	Ifrd1	+
1.51909	1.4811	1.60403	1.30974	1.41539	1.33723	-0.0201573	0.0609326	0.105292	-0.29976	-0.144382	-0.285	0.488892	0.0162749	0.228753	-0.0293427	-0.0403314	-0.132774	-0.0881605	-0.0523124	-0.188491	0.289902	-0.0795097	-0.205859	1.24e-16	1.54161	1.27e-10	1.19979	1.05e-13	1.51191	4.51e-14	1.55409	5.29e-13	1.44292	10450344	C2	+
1.48605	1.56211	1.23177	1.62473	1.38841	1.38004	-0.109832	0.0849657	-0.0337324	-0.157384	-0.0993719	-0.212237	-0.00927401	-0.110512	-0.0452208	-0.18192	0.0512671	-0.165595	-0.0486193	0.0512671	-0.0689473	-0.239378	-0.318775	-0.335558	6.39e-15	1.53345	1.23e-11	1.50052	2.34e-12	1.54427	8.75e-12	1.46762	1.12e-13	1.74342	10380025	Tex14	+
1.58166	2.12684	1.36227	1.20128	1.81597	0.982887	0.31272	-0.0329957	0.0727448	0.0630417	-0.319889	-0.223044	-0.135559	-0.263796	-0.272653	0.512753	0.119779	-0.021049	-0.028719	0	-0.0658536	0.441314	0.102243	-0.131332	1.33e-10	1.53305	2.92e-09	1.73582	7.78e-07	1.30799	2.52e-08	1.54334	3.37e-07	1.37441	10406626	Homer1	+
1.5591	1.95333	1.59533	1.54182	2.09841	1.66096	0.348897	0.0970745	0.431295	0.206572	-0.0265951	0.190505	0.0522599	-0.121552	-1.07689	0.769382	0.0228772	0.0687284	-0.145129	-0.335381	-0.363476	0.67934	0.319399	0.576421	2.23e-07	1.52687	4.34e-08	2.11688	4.8e-05	1.44783	9.82e-08	2.01615	0.000612008	1.20977	10587695;10595630	Mthfsl;Mthfs	+
1.54749	2.28799	1.08882	1.26378	1.98495	0.724398	-0.00586033	0	0.0561338	-0.0870161	-0.0989098	-0.0874224	-0.0378156	-0.0490112	-0.0135412	-0.0303707	-0.0380702	0.0173059	-0.0127568	-0.0295739	0.072216	-0.0571418	-0.0988812	-0.0754728	7.61e-06	1.52009	0.00027521	1.51636	0.000351935	1.49995	0.000434427	1.47294	0.000233934	1.56007	10536729	Spam1	+
2.4623	2.26587	2.00007	1.76007	1.40344	1.06562	0.447821	0.545263	0.868369	-0.184575	-0.0630302	0.223074	0.121901	-0.0648732	0.150856	-0.116873	-0.265969	0	-0.165052	-0.165119	-0.224266	0.237093	-0.460321	-0.671239	1.83e-07	1.52007	1.29e-06	1.75693	1.28e-07	1.95384	7.3e-08	2.01104	2.63e-08	2.12438	10347481	Cyp27a1	+
2.32977	2.33389	1.81716	1.88546	1.98672	1.05025	2.09363	0.0333652	-0.0405989	1.54814	-0.615298	-0.719088	0.927146	0.0776534	-0.405983	-0.13496	-0.472107	-0.577987	0.264947	0	-0.0970263	0.712895	0.744818	0.598652	0.000143233	1.51718	0.000743823	1.70093	1.24e-05	2.29556	0.000310777	1.84457	0.0211739	1.21508	10537157	Akr1b10	+
1.80039	2.0543	1.50033	0.921645	1.18759	0.750773	0.334832	0.152522	0.351343	-0.525131	-0.627338	-0.572476	0.212103	0.0233703	0.164517	-0.241268	0.0332174	0	-0.11392	-0.0627446	-0.294382	-0.400173	-0.105427	-0.363713	5.1e-09	1.51688	2.76e-05	1.23584	1.91e-06	1.43852	6.37e-07	1.52619	1.3e-07	1.65894	10572445	Lrrc25	+
2.09742	2.04233	2.03659	0.715102	0.744536	0.733389	0.667716	0.656744	0.333277	-0.672213	-0.613818	-1.08082	-0.0276041	-0.250483	-0.131628	-0.638646	-0.378836	-0.882484	0.24966	0.0337238	0.288953	0.0126152	0.2104	0.0913086	8.11e-06	1.51308	0.000241121	1.53146	3.22e-06	2.02822	0.00388437	1.20411	0.00216115	1.29012	10381588	Grn	+
1.48178	1.49409	1.14719	1.72744	1.86838	1.44735	0.0788975	0.800129	-1.27488	0.35802	0.998092	-0.827929	-0.0494642	-0.717098	0.145742	0.200826	-0.128955	-0.519115	0.0468912	0	0.154445	0.0790291	0.207903	0.277654	5.16e-06	1.50565	2.79e-05	1.73465	4.76e-05	1.67679	0.000320771	1.46059	0.00100704	1.33951	10386775	Prpsap2	+
1.20998	1.47072	1.01	1.01972	1.4954	1.08483	0.0187454	-0.642661	-0.0159254	-0.221532	-0.793593	-0.0366478	0.330058	-0.0438361	-0.190191	0.109463	-0.00486326	0	0.149458	0.253629	-0.115387	0.116468	0.217179	0.189546	3.56e-10	1.49704	7.23e-06	1.1831	6.97e-06	1.18024	1.63e-05	1.11921	5.91e-05	1.04071	10484999	Ddb2	+
1.55794	1.71888	2.34936	1.37617	1.32894	1.59098	0.877068	0.20818	-0.017858	0.421049	-0.172197	-0.354253	0.0633049	-0.0548821	0.104876	-0.0875869	0	0.0534058	-0.0335283	-0.121079	-0.037096	-0.140408	-0.0463882	-0.130916	9.61e-06	1.49338	0.000114985	1.61595	8.2e-05	1.66511	4.83e-05	1.71761	3.85e-05	1.75962	10466190		+
1.60609	1.41101	1.58841	0.981548	1.16621	1.08675	0	0.0653935	-0.0719752	-0.470569	-0.324987	-0.315858	0.0298915	-0.0665193	0.00723076	-0.13581	-0.105638	-0.0748372	-0.0799065	-0.107628	-0.143597	-0.34398	-0.191367	-0.389584	5.18e-13	1.493	6.52e-09	1.31647	7.34e-10	1.4121	6.75e-10	1.41704	3e-11	1.61498	10379518	Ccl7	+
1.91159	1.8143	1.13396	1.4123	1.47902	0.982188	0.00341845	0.0560331	0.280251	-0.2591	-0.309726	0.00685644	0.019536	-0.00419569	-0.0399518	-0.165575	0.0098505	-0.142078	-0.0825906	-0.100268	-0.139698	-0.183816	-0.262312	-0.257215	1.58e-09	1.49261	4.67e-07	1.46377	1.05e-07	1.55483	9.79e-08	1.56308	2.15e-08	1.69001	10353775	Bend6	+
1.91259	2.09106	1.55014	1.28125	1.61331	1.09932	0.384649	0.0996828	0.448361	0.0581546	-0.311112	-0.0581551	0.164506	-0.0784903	-0.0550575	-0.0422716	-0.105523	0.0544734	-0.0419126	-0.227708	-0.115587	-0.226791	-0.127226	-0.246695	8.76e-11	1.48768	7.88e-09	1.58096	2.67e-09	1.62239	6.55e-10	1.71968	3.01e-10	1.79152	10388065	Nlrp1b	+
1.79611	2.12824	1.41845	1.40929	1.525	1.00557	0.140072	0.040515	0.514611	-0.172898	-0.179015	0.0187688	0.162374	0.0490093	0.49643	0	0.0819569	0.312224	-0.271568	-0.218938	-0.307678	-0.261878	-0.00660992	-0.099874	7.11e-13	1.48677	8.38e-09	1.31117	8.22e-10	1.41572	1.26e-12	1.81317	1.55e-11	1.6699	10530151	Tlr6	+
1.83477	2.36517	1.80256	1.03619	1.38778	0.751561	0.390546	0.0555553	0.525682	-0.117306	-0.582879	0.0049386	0.207875	-0.134121	0.0292292	-0.100112	-0.0769568	0	0.0622363	-0.125988	-0.241061	-0.211252	-0.0561199	-0.0952449	2.08e-09	1.48358	3.5e-07	1.49535	7.63e-08	1.5887	4.55e-08	1.63128	4.08e-08	1.65055	10505465	6330416G13Rik	+
1.62807	1.8134	1.1869	1.15349	1.25206	0.723268	0.13144	-0.0338235	0.0742164	-0.302888	-0.491443	-0.492228	0.0232916	-0.0414295	0	-0.0226297	0.147853	0.211974	-0.0686708	-0.0467811	-0.0908942	0.0890083	-0.0571499	-0.0139527	9.01e-12	1.47865	6.83e-08	1.29891	3.6e-07	1.18047	1.74e-08	1.36165	6.81e-08	1.2869	10449266	Fam234a	+
1.89584	1.93891	1.71665	1.02395	0.972279	0.924322	0.484619	0.0956411	0.160797	-0.219201	-0.510445	-0.367978	0.125374	0.293052	0.198488	-0.457678	-0.398743	-0.677869	0.282786	0.132705	0.419191	0.00621986	0	-0.014945	1.27e-09	1.47142	9.54e-06	1.20636	4.66e-10	1.92342	2.39e-05	1.13377	5.24e-07	1.4149	10569319	Ctsd	+
0.896735	0.82599	0.716374	1.55561	1.47356	1.29416	-0.865627	-0.0904522	-0.854064	-0.189623	0.416359	-0.444904	-0.580185	-0.707097	-0.81745	0.115721	0.182634	0.0673284	-0.256645	0.0318508	0.252213	-0.0235977	0.122746	0.133669	9.89e-08	1.46512	1.72e-07	1.82865	0.00161382	1.00518	0.000465378	1.11793	0.00108726	1.04947	10386789	Ulk2	+
1.54284	1.72211	1.4099	0.971177	1.22639	0.972065	0.393818	-0.0281	0.0791354	-0.157216	-0.555079	-0.674307	0.0330215	0.309551	0.519497	-0.0961714	-0.118442	-0.164428	-0.280314	-0.415879	-0.0471845	-0.0821114	-0.111431	-0.13284	2.42e-09	1.46437	0.000157534	1.02006	5.77e-07	1.43376	1.09e-07	1.55521	8.32e-07	1.41621	10553324	Tmem86a	+
1.65245	2.00268	1.55588	1.34633	1.60829	1.2806	0.866622	-0.275896	0.428931	0.346403	-0.613619	-0.0748901	-0.22299	-0.0894671	-0.278845	-0.0805368	0.0413771	-0.12211	0.0292096	0	-0.0136914	0.00806379	0.0243731	0.0190878	1.24e-09	1.46145	4.85e-09	1.77147	1.97e-08	1.62813	4.6e-08	1.5692	6.18e-08	1.5572	10570472	Cln8	+
1.56799	1.68192	1.69556	1.23194	1.38925	1.28765	0.193614	0.11934	0.0822873	-0.00959015	-0.0893435	-0.171471	-0.0214467	-0.0390568	0	0.0266771	-0.152051	0.0696597	-0.128937	-0.0553694	0.0283551	-0.10629	-0.227304	-0.0852752	5.4e-20	1.45491	7.93e-17	1.49589	1.13e-17	1.49429	4.68e-18	1.5277	1.67e-18	1.61534	10367734	Ust	+
2.14363	2.492	2.26601	1.35418	1.42255	1.2997	0.807463	0.304305	1.24795	0.00315094	-0.276531	0.182804	0.221624	0.437994	0.64191	-0.165676	-0.321757	0.15883	0	-0.0885119	1.24e-05	-0.466377	-0.177353	-0.217165	1.29e-06	1.45149	0.000119177	1.39584	4.8e-07	1.93921	1.1e-06	1.85918	8.89e-08	2.11664	10492335	Rap2b	+
1.61953	1.7792	0.999949	1.50007	1.36482	0.762709	0.00714636	0.0862632	0.182837	-0.266607	-0.335738	-0.297787	0.112372	0.114883	0.10552	-0.047256	-0.0334921	0.0612898	-0.143799	-0.126558	-0.0905704	-0.269008	-0.279635	-0.293718	2.62e-12	1.44169	4.95e-08	1.22679	4.39e-09	1.3442	6.28e-10	1.45802	5.5e-11	1.6185	10394068	Sectm1a	+
2.17476	2.42691	2.05199	1.2982	1.59177	1.15624	0.655288	0.88625	0.904951	-0.378786	-0.012949	0.0129499	0.505354	-0.175591	-0.466038	0.40101	0.381954	0.403353	-1.4435	-1.48074	-1.52499	-1.29582	-1.37478	-1.40656	1.27e-07	1.43869	1.56e-07	1.82874	2e-05	1.38787	4.43e-14	3.26639	1.88e-13	3.14236	10350630	Fam129a	+
2.221	2.93983	2.17701	1.14983	2.18965	1.70777	1.22744	0.910462	0.865306	0.40582	0.318747	0.0475182	0.823354	0.067903	-0.11485	-0.0743847	-0.0486274	0	-0.0791106	0.0401926	-0.0446982	0.000684	-0.054276	-0.0885038	0.000236299	1.43496	0.000302928	1.80538	3.95e-05	2.10518	4.05e-05	2.09205	4.04e-05	2.11155	10501046	Gm10673	+
1.1904	1.37339	1.05343	1.44507	1.56153	1.34768	-0.266904	-0.488914	0.126913	0.025135	-0.511639	0.495116	-0.149303	-0.326854	-0.00964165	-0.314046	0.0383196	-0.657175	0.184582	0.274685	0.098773	0.185956	0.32969	0.192233	1.34e-08	1.43197	8.71e-07	1.49052	1.05e-07	1.63955	6.94e-05	1.14257	0.000151652	1.09262	10454286	Mapre2	+
2.07391	2.30481	2.00615	1.42263	1.63185	1.37406	0.953707	0.175494	0.954712	0.214426	-0.422855	0.346812	0.589242	-0.094698	-0.17787	-0.707173	-0.346949	-0.280229	-0.798952	-0.59024	-0.205808	0.0553956	0	0.10443	2.68e-07	1.43185	1.16e-06	1.69668	2.3e-09	2.24702	9.24e-10	2.3339	6.31e-07	1.74896	10508392	Rnf19b	+
2.84825	3.28549	3.03406	1.40712	1.55726	1.21639	1.42291	1.7247	1.31964	0.23726	0.24149	-0.125593	0.780916	0.178218	0.167906	-0.0168686	-0.0791726	0.0658112	0.130527	-0.0387511	0.116261	-0.0105376	-0.068491	-0.00305891	7.35e-05	1.42136	5.95e-05	1.84908	2.55e-06	2.23484	4.88e-06	2.15542	2.63e-06	2.25212	10479852	Camk1d	+
2.65649	2.67007	2.31898	1.26955	1.57345	1.20609	1.57434	0.900796	0.888248	0.0634842	-0.0634842	-0.194494	-0.0499368	0.220356	0.515141	-0.133913	-0.769045	-0.87246	-0.127253	-0.323653	-0.505592	0.514965	0.189566	0.819531	0.000130752	1.42096	0.000273301	1.72058	5.08e-07	2.54091	4.2e-06	2.26794	0.00255821	1.44108	10498992	Tlr2	+
1.6991	0.674734	2.19803	1.26784	0.444943	1.94643	-0.0777512	0.11213	0	-0.131144	-0.011117	-0.168935	0.0312033	0.0391607	-0.135523	-0.00467444	0.240669	-0.217738	0.0165653	-0.123294	-0.187387	-0.329765	-0.292191	-0.369782	3.26e-09	1.41798	7.96e-07	1.39357	1.01e-06	1.36576	2.38e-07	1.46989	1.19e-08	1.70243	10509577	Pla2g2d	+
2.35413	2.52795	2.50814	1.14878	1.27131	1.17787	1.40673	1.15525	0.857937	-0.0338965	-0.370501	-0.52204	1.11032	0.278702	0.946362	-0.356284	-0.470717	-0.374352	-0.224983	-0.182429	-0.101855	0.0483027	0.0443649	-0.133143	0.000124366	1.41578	0.0211379	1.0529	4.97e-06	2.23181	2.99e-05	2.00112	0.000116182	1.84485	10573583	Man2b1	+
1.76791	2.13454	2.20802	0.809238	1.1345	1.06189	0.420255	0.139559	0.63752	-0.000891	-0.540082	0.000891	0.111394	-0.139661	0.241577	-0.0852704	0.054997	0	0.0590992	-0.0750732	-0.165474	0.250673	-0.237659	-0.0282664	1.12e-06	1.40981	4.27e-05	1.44825	1.82e-05	1.52944	1.01e-05	1.57983	2.14e-05	1.52444	10420114	Tgm1	+
1.05374	1.78489	1.60809	1.01683	1.45669	1.28862	0.171083	-0.00928259	0.0239425	-0.0160604	-0.219797	-0.173674	-0.0157647	-0.0159931	0.0796843	-0.14293	-0.132312	-0.175426	0.0342317	0.0421877	-0.0848322	0.0206103	-0.0265202	0	1.58e-15	1.40544	5.62e-12	1.35217	8.01e-14	1.51837	1.4e-12	1.37095	1.9e-12	1.37011	10438603	Igf2bp2	+
1.14083	2.07227	1.88178	0.843948	1.69273	1.56855	0.546737	0.0692019	0.0382242	0.278312	-0.0837145	-0.0766926	0.0630617	0.0185823	0.143693	-0.0605125	-0.0141067	-0.0159945	0	-0.0478382	-0.0502448	-0.0351806	-0.0410686	-0.00691652	3.85e-10	1.40467	4.66e-08	1.45824	6.61e-09	1.56356	6.57e-09	1.56605	8.71e-09	1.56107	10435920	Cd200r4	+
3.11444	3.07594	2.61378	1.093	1.42023	0.975015	1.79022	1.30625	0.606317	0.510103	-0.180478	-0.158308	1.51519	0.306914	0.482921	-0.203985	0.192057	-0.00503731	-0.110891	-0.252223	-0.117534	0.00709438	-0.177188	-0.0383139	0.000408222	1.40305	0.0103483	1.28039	8.09e-05	2.05439	2.5e-05	2.20895	5.49e-05	2.1182	10600698	5430427O19Rik	+
2.44421	2.78163	2.0265	1.62135	1.85137	1.11018	0.926817	1.08776	1.13175	0.121364	-0.0504098	0.199963	0.400816	0.0966153	-0.00883865	-0.161432	-0.0108247	-0.0533924	-0.082798	-0.103518	0.174904	-0.261845	-0.142873	-0.177207	3.72e-07	1.403	3.25e-07	1.80968	1.79e-08	2.04776	4.12e-08	1.97635	6.37e-09	2.16652	10573954	Capns2	+
2.6313	2.13477	1.11979	2.21523	1.4403	0.467773	1.35296	0.0446611	0.250387	0.633725	-0.375979	-0.300116	0	-0.114821	0.196509	-0.133717	-0.191466	-0.132294	-0.169322	-0.107645	-0.40319	-0.42693	-0.353675	-0.285222	1.66e-05	1.40059	6.18e-05	1.64096	1.25e-05	1.82069	6.06e-06	1.89491	2.22e-06	2.02347	10416340	Gfra2	+
2.62003	2.52036	2.76443	1.60896	1.33138	1.55018	1.83889	0.705565	0.891698	0.81288	-0.127442	-0.120789	0.873772	0.147563	0	-0.70783	-0.694643	-0.485361	-1.04273	-0.719628	-0.845549	0.493432	0.412617	0.649369	7.32e-05	1.39909	0.000123282	1.72545	4.32e-08	2.69517	6.49e-09	2.93519	0.000601963	1.54742	10389143	Slfn8	+
1.82066	2.00207	1.65478	1.29077	1.55475	1.25039	0.367861	0.468525	0.477991	-0.116869	0.074039	-0.0825052	0.821363	0.0447011	0.437231	-0.0385556	-0.214372	-0.0998702	-0.116359	0.0345206	-0.231579	0.23019	-0.401114	-0.279316	2.05e-09	1.3974	1.09e-05	1.16114	3.68e-09	1.71317	4.53e-09	1.70004	3.08e-09	1.74565	10556082	Ppfibp2	+
1.28305	1.37956	0.979393	1.58136	1.54305	1.09805	-0.0734205	0.00384331	-0.39336	0.115614	0.172428	-0.302885	-0.4379	-0.466187	-1.41579	-0.360233	-1.06787	-0.375167	0.26762	0.18446	0.304188	0.0301437	0.0173893	0.237743	3.93e-06	1.39037	2.13e-07	2.08404	9.14e-07	1.91183	0.00394222	1.05865	0.00102798	1.21565	10376060	Irf1;Irf1	+
1.33585	1.97308	0.982174	1.05799	1.63165	1.10517	-0.175325	0.0529056	0.0614524	-0.156101	-0.0199471	-0.00864792	0	-0.0539303	-0.0576887	0.0258903	-0.0994625	-0.0412922	-0.108685	-0.0255313	-0.128447	-0.0906897	-0.103623	-0.0325422	4.68e-12	1.3886	2.74e-09	1.38486	1.44e-09	1.38594	6.26e-10	1.43521	9.73e-10	1.42327	10431182	Smc1b	+
1.83177	1.56407	1.452	1.38091	1.25589	0.919503	0.160171	0.0788751	0.414914	-0.303042	-0.385889	0.13475	0.315486	0.686304	-0.0854497	-0.389063	-0.611869	-0.229165	0.161262	0	0	-0.183054	-0.107317	-0.404795	5.23e-10	1.38406	9.26e-06	1.09524	1.79e-10	1.81072	1.72e-07	1.34693	3.02e-09	1.63241	10481210	Vav2	+
1.16361	1.31772	1.23097	1.43055	1.52848	1.40495	0	-0.244531	0.283079	0.0246387	-0.395193	0.131875	0.0594902	-0.130477	-0.0939693	-0.270132	0.252382	0.191425	-0.0573921	-0.0462413	-0.0489388	-0.268045	0.262873	0.232841	3.8e-12	1.3794	1.58e-09	1.40103	5.87e-09	1.28816	8.5e-10	1.3969	1.03e-08	1.27016	10575021	Zfp90	+
2.60558	2.47811	2.44703	1.02883	1.03567	0.860687	1.54508	0.568291	0.608873	0.102233	-0.205526	-0.43523	0.679217	-0.021699	0.028697	-0.211714	0.352861	0.929055	-0.294031	-0.42406	-0.636213	0.240004	-0.385707	-0.256257	0.000439169	1.3787	0.00238352	1.51391	0.00626377	1.38592	2.33e-05	2.19409	0.000265835	1.87664	10354191	Rnf149	+
1.89936	1.8065	1.58764	1.44071	1.28775	1.21094	0.540629	0.396207	0.205667	0.124889	-0.0363636	-0.220603	0.532644	-0.133863	0.0187841	0.0834279	-0.172226	-0.0531468	0.0593505	-0.155303	0.197479	-0.125854	0.0369244	0.0577931	2.58e-11	1.37041	6.51e-09	1.39963	1.84e-10	1.58613	6.87e-10	1.50498	4.27e-10	1.5492	10419471	Tep1	+
1.32249	1.60574	1.4365	1.14318	1.11007	1.06154	0.211942	0	0.0216413	-0.122571	-0.251348	-0.337636	0.0168858	-0.0751743	-0.0816989	-0.142441	-0.00267601	0.246013	0.0348806	0.0259671	-0.0548487	-0.490454	-0.254905	-0.200672	6.25e-16	1.35958	1.57e-12	1.32658	3.17e-12	1.24629	1.53e-12	1.27792	4.07e-15	1.59527	10383032	Engase	+
2.01663	1.46766	0.893014	1.82254	1.29825	0.617325	0.213973	-0.0127244	-0.0151944	0.0659685	-0.139834	-0.143622	0.260822	-0.0963717	0.116388	-0.0331716	0.0692973	0.122659	0.00773334	-0.114248	0.0266886	-0.173407	-0.0520058	-0.0824323	2.69e-08	1.35781	1.18e-05	1.25896	6.38e-06	1.29964	2.16e-06	1.37918	9.05e-07	1.45519	10414470	Tlr11	+
1.41258	1.38868	1.19711	1.33592	1.31729	0.991305	0.0187016	-0.0435782	0.0504284	-0.0232315	-0.307068	-0.128807	-0.0847931	-0.5717	-0.339806	0.102414	0.0255623	-0.376543	0.0210476	0.104941	-0.0343857	0.230661	0.250455	0.313694	1.9e-05	1.34607	5.51e-05	1.60591	0.000553883	1.35667	0.00151836	1.24328	0.0119318	1.00888	10542006	D6Wsu163e	+
1.72967	1.41804	1.12101	1.49208	1.18527	0.891199	0.0585403	0.0750527	0.0580664	-0.239079	0.0124745	-0.174681	-0.0858583	-0.137709	-0.154339	-0.0382185	-0.0805082	0.104109	-0.0555573	-0.111333	-0.0835381	0.0246902	0.213677	0.19936	8.89e-13	1.34115	1.25e-10	1.43218	5.33e-10	1.31108	1.25e-10	1.38969	1.23e-08	1.1603	10554667	Tmc3	+
2.84941	3.47842	2.63955	1.2451	1.51929	1.20458	2.27108	2.70622	0.535518	0.59582	0.161918	-1.31702	1.97025	0.068644	0.0894413	-0.109209	-0.444934	-0.349785	0.603549	0.215448	-0.210743	-0.0875158	-0.396723	-0.358081	0.0121652	1.33047	0.0363885	1.44661	0.000576281	2.45737	0.00611311	1.95331	0.000698383	2.43683	10471945	Zeb2os	+
3.60384	3.88507	3.52379	1.31008	1.52807	1.06894	2.16833	2.46413	1.97194	-0.0625524	0.318007	0.0901003	0.572292	0.272703	0.56875	-0.0665941	-0.0905581	0.0214457	0.0240641	-0.094851	-0.153268	0	0.00960731	-0.234958	0.00845428	1.3283	0.00236789	2.01538	0.000197711	2.53186	0.000165486	2.56131	0.000186977	2.56175	10534940	Pilrb2	+
1.59839	1.67016	1.44626	1.40395	1.47786	1.2697	0.232093	0.59641	0.0661612	-0.115636	0.314171	-0.17308	-0.0717926	-0.32417	-0.384966	0.101813	-0.469375	0.194951	-0.00149775	0.0181646	-0.16648	0.276388	0.132338	0.250046	2.73e-09	1.32437	1.86e-09	1.73803	1.78e-08	1.53526	2.06e-08	1.52766	1.32e-06	1.25813	10563838	Nipa2	+
2.57487	2.10616	2.06161	1.2188	1.14976	1.01731	0.990628	0.264885	1.5021	-0.10104	-0.454872	0.0405941	0.00629234	0	-0.083951	-0.0653391	-0.132059	-0.0763969	-0.0480175	-0.149656	-0.239117	-0.193883	-0.16324	-0.127498	3.61e-05	1.31437	2.77e-05	1.71397	1.49e-05	1.77935	8.54e-06	1.83368	8.77e-06	1.84962	10351792	Slamf9	+
1.85621	2.40432	1.86782	1.45627	2.17728	1.73222	0.612607	0.230913	1.17344	0.520162	0.0908999	0.994329	0.327717	0.0595427	-0.126307	0	-0.317069	0.245095	0	-0.17918	-0.428956	-0.790713	-0.534365	-0.738152	7.79e-07	1.31196	1.56e-07	1.8287	3.17e-08	1.93968	4.36e-09	2.1184	3.09e-11	2.60343	10352448	Dusp10	+
2.45173	2.41831	2.16202	1.46668	1.45947	1.03537	1.1726	1.12597	1.08564	0.0113125	-0.0113134	-0.100895	0	0.0566206	-0.157452	0.929768	-0.44135	-0.682248	-0.978756	-0.923436	-0.674807	-0.373013	-0.60011	-0.0818214	0.00013453	1.28504	2.32e-05	1.86587	1.73e-05	1.89687	1.9e-08	2.69126	1.64e-06	2.18391	10439936	Nfkbiz	+
1.69454	1.70889	1.65707	1.25497	1.47776	1.21572	0.636723	0.123503	0.30371	0.278724	-0.18645	0.169741	0.832194	-0.120504	-0.0941925	-0.218739	-0.0418577	-0.145605	0.0283232	-0.0272336	0.275815	-0.224224	0.0568757	0.174502	5.13e-05	1.2805	0.00100255	1.29566	5.53e-05	1.63689	0.000419702	1.40919	0.000211377	1.49911	10559825	Zfp773	+
1.46226	1.56873	1.17959	1.33915	1.44576	0.978352	0.364833	-0.0203323	0.208271	0.0600119	-0.221635	-0.0650749	0.125046	0.359973	0.416096	0.0319347	-0.446143	0.116689	-0.0164299	0.215504	-0.211781	0	0.249323	0.240417	5.57e-07	1.27463	0.00060603	1.0286	5.52e-06	1.42815	1.71e-05	1.33321	0.000152169	1.16573	10451860	Pot1b	+
2.4944	2.54497	1.85828	2.06026	1.99579	1.38935	0.882583	1.02298	1.56113	0.122917	0.517023	0.701045	0.263066	0.497939	0.984995	-0.197166	0.164424	-0.156978	-0.00147295	-0.145864	0.00759315	-0.235534	-0.197431	-0.306159	3.4e-06	1.2559	1.41e-05	1.47518	9.91e-09	2.12042	1.22e-08	2.10376	1.83e-09	2.30355	10464594	BC021614	+
1.54771	1.41413	0.557283	1.38559	1.25818	0.575242	-0.124322	0.00500774	-0.224265	-0.168233	-0.0148315	-0.241971	0.0578179	-0.0921888	-0.193134	-0.679538	-0.2023	-0.384764	0.08637	0.0107884	0	-0.821904	-0.495358	-1.01921	4.75e-07	1.25112	6.02e-05	1.19886	7.84e-07	1.54522	0.000231771	1.09063	1.19e-08	1.90185	10400926	Rtn1	+
1.54475	1.5731	1.1934	1.10615	1.07687	0.686772	0.143208	0.203272	-0.0387149	-0.188273	0.0733652	-0.444453	-0.0483189	0.0120077	0.450184	-0.252605	-0.16003	0.135736	0.0877023	-0.106523	-0.212111	-0.264752	-0.301782	-0.13608	9.71e-10	1.23877	3.82e-06	1.05888	6.93e-08	1.28914	9.24e-08	1.27382	8.69e-09	1.43105	10345203	Paox	+
2.40218	2.55561	2.12525	1.12302	1.1817	0.781635	1.41796	0.652516	1.46125	0.0408096	-0.783678	-0.0408096	0.937731	0.236272	-0.0372748	-1.71261	-1.8066	-1.51472	0.630321	0.378973	0.436506	0	0.203601	0.207304	0.00199224	1.23689	0.0103121	1.31599	1.17e-08	3.37288	0.0224229	1.21297	0.00340842	1.55793	10350742	Rnasel	+
2.31955	2.29689	2.12422	1.5145	1.64446	1.16472	1.67023	0.742909	0.489552	0.743584	0.0639978	0.000135	1.03091	-0.131814	0.0574317	-0.381137	-0.341093	-0.390919	0.000321	0.142786	-0.00635576	0.173111	0.2701	0	6.25e-05	1.22565	9.27e-05	1.52521	1.3e-07	2.2151	7.07e-06	1.79847	2.18e-05	1.69632	10532630	Adrbk2	+
1.45713	1.28206	0.836183	1.56538	1.35739	0.828391	-0.160047	-0.0544352	0.382371	-0.360815	-0.0685611	0.261294	-0.0162067	0.0708089	-0.128874	0.0130281	0.00767136	0.0381432	-0.00747108	0.00696278	-0.237075	-0.185673	-0.148568	0	2.06e-10	1.22112	3.93e-08	1.24585	5.89e-08	1.20147	1.07e-08	1.30028	7.43e-09	1.3325	10511896	Bach2os	+
1.59122	2.03436	1.38702	1.0152	1.41955	0.805214	0.33043	0.261083	0.37101	-0.0128298	-0.0235004	0.00286579	0	-0.00268173	0.126541	-0.183589	0	0.34564	-0.118299	-0.280267	-0.1805	-0.564798	-0.213761	-0.671819	4.71e-09	1.22058	1.49e-07	1.33414	1.28e-07	1.32141	2.91e-09	1.56845	5.17e-11	1.85889	10363346	Sowahc	+
1.63344	1.51531	1.40049	1.38672	1.5492	1.09787	1.01195	0	-0.178613	0.844125	-0.17383	-0.196217	0.168178	-0.411778	0.0515828	-0.16305	-0.00847292	-0.0644126	-0.114697	-0.188088	0.072607	-0.454795	-0.320171	-0.129556	3.62e-06	1.2126	6.8e-06	1.49451	5.25e-06	1.50915	5.28e-06	1.50723	4.54e-07	1.73201	10360832	1700056E22Rik	+
1.60747	1.44528	1.15088	0.929569	1.10902	0.970482	0.0808029	-0.0624952	0.118673	-0.0823016	-0.112663	0.0237122	-0.365473	-0.121638	-0.0213442	0.0355749	-0.0905099	0.0599103	-0.364584	-0.262583	-0.315268	-0.00509071	0.188499	0.356243	5.45e-11	1.20783	1.27e-09	1.3716	1.45e-08	1.20046	4.9e-11	1.51626	5.18e-07	1.02223	10524631	Oasl1	+
1.05576	1.68115	0.926272	0.758127	1.48946	0.696938	0.0507097	-0.0691824	0.064919	-0.127716	-0.396242	-0.128121	-0.101105	-0.0976453	0.0310683	-0.0567789	0.025393	-0.0890574	-0.183311	-0.0103502	-0.0831199	-0.292913	-0.0557194	-0.187269	1.11e-10	1.20222	7.74e-08	1.15718	7.42e-08	1.14143	2.95e-08	1.19354	7.43e-09	1.27992	10415857	Fam167a	+
2.99957	3.28744	2.97761	1.01275	1.32589	0.939455	2.20492	2.1077	1.18776	0.104111	-0.0195951	-0.218851	1.45503	-0.558935	-0.226824	-0.752783	-0.957665	-0.563305	-0.448893	-0.43976	-1.01374	0	-0.638667	-0.305566	0.00987078	1.19611	0.00221175	1.86736	9.22e-06	2.84837	1.83e-05	2.72458	0.000140511	2.40519	10519951	Gsap	+
0.827424	1.23531	0.784792	1.26075	1.88352	1.3055	-0.215821	-0.641877	0.586559	0.0958672	-0.442374	0.760327	-0.355054	0.359054	0.0155458	0	0.0218973	-0.473247	-0.409073	-0.233359	0.296748	-0.206044	-0.0498581	-0.418447	0.000595393	1.19244	0.00602285	1.2097	0.00243609	1.36667	0.00312891	1.33144	0.00151938	1.441	10521602	Cpeb2	+
1.24958	2.2269	1.36898	0.807216	1.9111	0.849213	0.442882	0.295576	0.361537	0.131179	0.01788	0.0317249	0.107509	0.117594	-0.104496	0.708104	-0.203046	-0.0878563	-0.322148	-0.176171	-0.313725	-0.348776	-0.245532	-0.369105	2.1e-07	1.1887	1.73e-06	1.36196	5.9e-06	1.2631	2.22e-08	1.67284	1.36e-08	1.7233	10504838	Nr4a3	+
2.51367	2.75835	2.62318	1.28566	1.63569	1.43005	1.58579	1.16293	1.48712	0.401758	0.0170283	0.47923	-0.315682	-0.210899	-0.26236	0.0113563	-0.329574	-0.126846	0.0980697	0	0.512371	-0.396818	-0.447959	-0.389572	4.07e-05	1.18546	2.13e-08	2.30408	4.35e-08	2.18945	1.56e-06	1.83762	4.27e-09	2.45255	10565890	Dnajb13	+
2.02776	1.96111	1.97123	1.30556	1.24713	1.24214	0.665469	0.944428	1.00447	-0.218015	0.120375	0.155474	0.628923	-0.32288	1.52404	0.0355205	-0.0263119	-0.0299969	0	-0.0152445	-0.307861	0.888284	0.185975	0.236536	0.00130208	1.18045	0.0296723	1.01579	0.000703033	1.63275	0.000334039	1.73352	0.0163841	1.18889	10572146	Atp6v1b2	+
1.76951	1.32499	1.43476	1.44713	1.16413	1.16824	0.783763	0.120383	0.0820155	0.335245	0.01366	-0.0952616	-0.0492687	-0.372463	-0.180368	0.0924773	0.0871892	-0.0221457	0	-0.357071	-0.221815	0.160459	0.0431423	-0.00465345	3.3e-08	1.17816	1.19e-08	1.58549	3.32e-07	1.33229	8.75e-09	1.57775	4.69e-07	1.31848	10406718	Wdr41	+
1.81517	2.11948	1.56155	0.868951	1.17251	0.635962	0.251022	0.506291	0.781663	-0.267256	-0.23053	0.0689683	0.0479493	-0.563487	0.0228014	-0.167851	-0.158853	-0.209866	-0.0798287	-0.191034	-0.204483	-0.311955	0	0	2.4e-06	1.17724	1.88e-06	1.52652	1.36e-06	1.54113	1.77e-06	1.52072	3.98e-06	1.46626	10525086	Slc8b1	+
1.78574	2.19419	1.72159	1.17179	1.26951	1.08754	0.19174	0.793099	0.854158	-0.178052	0.149179	0.376339	0.0372634	1.08366	-0.0449934	-0.108529	-0.104207	0.0542998	-0.155084	-0.115412	-0.0262704	0.942429	0.105106	0.0860057	4.6e-07	1.17398	2.97e-05	1.17975	1.12e-07	1.5912	6.37e-08	1.63731	4.15e-05	1.16054	10480459	Hnmt	+
3.54357	3.55578	3.28497	1.18991	1.31102	0.932567	2.52388	1.8909	2.36834	0.049221	-0.0663013	0.0519266	1.48795	-0.16854	0	-0.154537	-0.198831	-0.123481	-0.19114	-0.2662	-0.159599	0.184728	0.0625987	0.213489	0.0229924	1.16664	0.00583317	1.86316	0.000394443	2.46192	0.000306831	2.50861	0.00205462	2.14936	10416566	Epsti1	+
0.963453	1.27778	1.30947	0.620755	1.06206	0.906984	0.291398	0.2096	-0.451846	0.0301304	-0.0301294	-0.8972	0.229562	-0.113223	-0.542064	-0.441178	-0.352369	-0.192744	-1.30577	-1.38514	-1.14362	-0.97524	-0.945758	-0.604269	0.000363511	1.16476	0.00473493	1.16532	0.00134336	1.35218	3.65e-07	2.30159	1.9e-05	1.86517	10518335	Zfp534;Zfp981;Zfp980;Zfp991;Zfp987;Zfp985;Zfp992;Zfp986;Znf41-ps;Zfp991	+
1.1528	1.24253	0.994479	1.52623	1.45362	1.30988	0.172202	0.0859547	0.036725	0.187587	0.185555	0.0357256	-0.0167932	-0.228108	-0.448377	0.0329161	-0.162354	0.37987	-0.00822353	-0.00233269	0.228715	0.282422	0.276334	0.274143	1.35e-12	1.16263	1.27e-12	1.51102	2.14e-10	1.19645	1.71e-10	1.2072	1.86e-08	1.00229	10346970	Pikfyve	+
2.02084	2.21447	1.86409	0.973846	1.18226	0.936387	1.42148	0.444947	0.542034	0.219413	-0.251062	-0.122368	-0.43925	0	0.00482845	0.289093	-0.539217	-0.414096	-0.294612	-0.0672274	0.518168	-1.20908	-0.808106	-0.704844	6.06e-05	1.15624	9.18e-06	1.67679	3.84e-06	1.75339	6.12e-05	1.47987	5.23e-09	2.43933	10563338	Ppp1r15a	+
3.264	3.3946	3.09064	1.16086	1.38628	0.941758	2.29672	1.77605	2.16029	0.0679903	-0.184982	0.203401	1.72928	0.119171	0.746135	-0.0868158	0	-0.185983	-0.0129166	-0.197365	-0.485122	-0.282552	-0.115963	-0.438097	0.0125165	1.15311	0.0258934	1.34149	0.000234257	2.29729	9.95e-05	2.43816	8.53e-05	2.48523	10477250	Hck	+
1.40925	1.24545	0.870608	1.08337	1.14743	0.789988	-0.0902734	0.127555	0.225628	-0.360135	-0.172565	-0.0870233	0.0224114	0.0441861	0.112449	0.0313759	0	0.0690899	-0.146442	-0.0781326	-0.00862837	-0.0347691	-0.0313168	-0.0777555	5.69e-15	1.15048	1.03e-10	1.03133	2.35e-11	1.05753	1.54e-12	1.16875	4.05e-12	1.13896	10365428	Btbd11	+
1.73257	1.68538	1.62158	0.941958	0.917113	0.797876	0.650742	0.270952	0.583871	-0.0244064	-0.340698	-0.281976	0.375161	0.391856	-0.14901	-0.231172	0.0471478	0.133439	-0.0862961	-0.0656967	-0.306815	-0.132326	0.0764113	0	1.87e-05	1.13967	0.00101122	1.07674	0.000108018	1.29961	2.27e-05	1.43568	0.000115586	1.30138	10401519	Npc2	+
2.1987	3.01046	2.64452	0.727283	1.60101	1.07246	1.51209	1.73945	1.14908	0.0973187	0.421923	-0.481024	0.377216	-0.451095	-0.417499	0.742097	0.0217681	0	-0.415153	-0.333509	-0.782677	-0.616198	-0.513593	-0.455575	0.00789774	1.13593	0.000343253	2.03953	0.00452832	1.62112	4.08e-05	2.38618	4.18e-05	2.40419	10363735	Egr2	+
1.64057	1.80792	1.12469	1.04455	1.29659	0.895523	0.604976	0.0198984	0.46523	0.199691	-0.414236	0.133645	-0.188667	0.462202	0.323802	0.230639	-0.0278077	0.0488481	-0.0085082	0.0604649	0	-0.110739	-0.378444	-0.313964	2.82e-07	1.13344	3.32e-05	1.10253	6.33e-06	1.21775	2.41e-06	1.28432	5.1e-08	1.56936	10412227	Snx18	+
1.39871	1.43605	1.02076	0.919287	0.985845	0.570925	0.361882	0.0110784	-0.0906401	0.0624986	-0.317643	-0.477876	0	-0.347127	-0.130458	-0.0266151	-0.0326629	0.0276151	-0.207974	0.0710487	-0.227064	-0.0609999	0.0216322	0.102903	6.62e-10	1.13038	3.65e-08	1.21446	3.97e-07	1.06582	5.05e-08	1.17659	8.24e-07	1.03409	10451551	Guca1a	+
0.872583	1.50144	1.3689	0.610187	1.10698	0.954844	0.405623	0.401961	-0.306335	0.0198193	-0.0198183	-0.8549	0.27688	-0.2566	-0.582863	-0.333	-0.41984	0	-1.39806	-1.37098	-1.12141	-1.09092	-1.14204	-0.712258	0.00178241	1.1281	0.00669745	1.25668	0.00540164	1.3201	2.09e-06	2.36597	2.81e-05	2.05089	10518346	Zfp534;Zfp991;Zfp987;Zfp992;Zfp986;Znf41-ps;Zfp991	+
1.11477	1.2904	1.09828	0.98533	1.08659	0.958307	0.192457	-0.192241	0	0.0966763	-0.237409	-0.0332022	-0.0575032	-0.148085	-0.0264044	-0.248731	-0.14654	-0.123506	-0.0561295	-0.140163	-0.208921	0.0133791	-0.132615	-0.316061	5.26e-14	1.1179	1.56e-11	1.16628	7.47e-13	1.26187	1.63e-12	1.22402	1.78e-12	1.23405	10528038	Adam22	+
3.39452	3.25846	3.24798	1.04042	1.12604	0.945871	2.55036	1.85098	2.08527	0.0277176	-0.17092	-0.0277185	1.81247	-0.109972	0.386154	-0.775071	-0.748605	-0.676086	-0.294894	-0.548766	-0.7672	-0.851872	-0.831921	-1.13724	0.0231712	1.11627	0.0222042	1.47266	2.01e-05	2.90214	5.72e-05	2.70584	7.2e-06	3.10923	10516966	Themis2	+
3.15131	3.44242	2.70039	2.50438	2.51799	1.85888	1.12422	3.25492	2.02882	-0.0478106	2.40295	0.896664	-0.0349235	-0.097599	0.0452552	0.00129127	-0.181617	-0.0924425	-0.186655	0.0199313	0.31287	-0.332139	-0.157322	-0.183139	0.00231213	1.08594	1.43e-07	2.72498	6.28e-08	2.78682	1.91e-07	2.64718	2.78e-08	2.9201	10583112	Mmp27	+
1.56031	1.56248	1.09314	1.13763	1.06737	0.563404	0.471026	0.109045	0.395748	0.033176	-0.338614	-0.145515	0.152367	0	0.0470638	0.0409303	-0.0224447	-0.0358901	-0.000371	-0.0584335	-0.126583	-0.26157	-0.129661	-0.0428009	2.3e-09	1.07658	3.06e-07	1.09758	6.2e-08	1.16986	2.33e-08	1.22585	6.46e-09	1.30873	10592266	Slc37a2	+
1.9732	1.95211	1.77588	1.52054	1.4553	1.31532	0.670823	1.23659	0.779875	0.0141621	0.629658	0.250904	-0.633305	-0.334646	-0.8873	0.223558	0.38523	0.669861	0.0337915	0.0629225	0.161703	-1.40815	-1.53592	-1.37368	0.000103498	1.06839	1.17e-08	2.28381	0.000417267	1.23917	1.15e-05	1.57925	3.87e-12	3.10464	10401244	Actn1	+
3.01125	2.95736	2.01286	1.26079	1.40035	1.02071	1.88514	1.42487	1.60189	0.257965	0.0050354	0.192654	0.705225	0.0860877	0.460332	-0.0959091	-0.216265	-0.239016	-0.252792	-0.30849	-0.340707	-0.475252	-0.344194	-0.482851	0.00174099	1.0493	0.000489014	1.52667	3.68e-06	2.12762	1.39e-06	2.24455	5.17e-07	2.37799	10545588	Hk2	+
1.37496	1.55472	1.11645	1.46578	1.9382	1.22435	0.574995	0.623707	0	0.717986	0.313375	0.190879	0.449954	-0.264066	-0.655725	-0.770126	-0.418825	-0.540132	0.413083	0.167228	-0.00385714	-0.649158	-0.472804	-0.0032568	1.7e-05	1.04225	7.1e-07	1.60236	3.82e-09	2.0221	4.23e-05	1.25359	4.97e-08	1.82082	10345777	Il1rl2	+
1.86206	2.30652	1.6816	0.960838	1.37098	0.982148	1.25665	0.461226	1.0433	0.379475	-0.314441	0.124335	0.296736	0.155986	0.0812559	-0.0217142	0	-0.0232081	-0.0348525	-0.213513	-0.280751	-0.229327	-0.269428	-0.127324	1.72e-05	1.0356	1.31e-05	1.34937	1.11e-06	1.54233	1.54e-07	1.70373	1.17e-07	1.73605	10445412	Nfkbie	+
1.60683	1.68438	1.51291	1.08971	1.11253	0.713568	0.427425	0.601065	0.54198	-0.0163508	-0.0476942	0.0900765	-0.55316	-0.200175	-0.759918	0.0709486	0.106384	0.289031	0.320198	-0.017899	0.517564	0.0239539	-0.0850701	-0.0808477	0.00107279	1.02057	2.03e-05	1.79107	0.00551794	1.1312	0.0134121	1.01337	0.00118124	1.33397	10606714	Gla	+
3.63919	3.66144	3.20012	1.32119	1.49129	0.940324	2.54845	2.87728	2.49523	-0.0435934	0.37518	-0.100555	1.4914	0.704711	0.157371	-0.33876	-0.304819	-0.197691	-0.171088	-0.19596	-0.0734859	1.00923	0.0710487	0.415102	0.0487194	1.01693	0.0188296	1.5911	0.00016226	2.65602	0.000316415	2.52244	0.00824157	1.87713	10472501	Cers6	+
1.54775	1.55132	1.36569	0.725772	0.839486	0.712311	0.841436	-0.0652881	0.533261	0.084547	-0.706899	-0.00441647	-0.00239468	-0.0116959	0.304865	-0.0826821	-0.0195417	0.0644102	-0.155068	-0.091589	-0.21909	0.159445	0	0.0499225	6.32e-05	1.00995	0.00112143	1.0268	0.00039048	1.13633	7.52e-05	1.27897	0.00104435	1.05393	10561306	Pld3	+
1.6447	1.88492	1.23901	1.14091	1.28768	0.838126	0.37418	0.255307	1.11844	-0.263446	-0.11252	0.609201	0.0629048	-0.265284	-0.159174	-0.205358	-0.163801	-0.21121	-0.0752049	0.0149202	-0.204841	0.324749	0.127524	0.280517	3.17e-05	1.00903	4.38e-06	1.45974	1.62e-06	1.53268	5.83e-06	1.4276	0.00036645	1.09496	10526693	Zcwpw1	+
1.62318	1.54122	1.52902	0.98138	1.00541	0.948248	0.679853	0.437246	0.710515	0.0251198	-0.251621	-0.0251207	0.207056	-0.3606	0.198159	-0.473052	-0.155486	0.496996	-0.0856924	-0.122494	-0.200223	0	0.203196	0.113531	4.32e-05	1.00875	6.4e-05	1.25654	3.38e-05	1.31526	1.05e-05	1.40755	0.000213964	1.16583	10426451	Irak4	+
-1.43686	-2.00381	-0.978554	-1.52259	-2.1677	-0.859486	-0.198666	-0.435979	-0.353773	-0.17005	-0.492764	-0.362117	-0.320625	-0.206944	-0.484888	0.285258	0.494131	0.614276	-0.0819578	0.000738	0.139701	-0.111264	0.0578117	0.115941	7.15e-09	-1.15927	1.13e-06	-1.15735	4.15e-12	-1.95939	3.04e-09	-1.51433	3.81e-09	-1.51566	10461369	Ahnak
-2.03113	-1.99575	-1.69738	-1.13807	-1.23345	-0.854872	0.606207	0.351306	0.0927162	1.48875	1.41701	0.974555	-0.237316	0.401388	0.114376	0.304791	0	0.320122	-0.273551	-0.308104	-0.576605	0.871807	1.1188	1.08281	1.01e-10	-2.31353	3.14e-05	-1.58459	9.93e-06	-1.70008	0.00294508	-1.10569	4.22e-09	-2.51625	10418766	Ankrd28
-1.46774	-1.76726	-1.36637	-1.89828	-2.26225	-1.68403	-0.107806	0.180458	0.208861	-0.278135	-0.0892248	0.0432539	-0.157154	-0.260372	-0.0994148	-0.283312	-0.270872	0.104686	0.0673094	0.0832987	0.550876	0.387079	0.587309	0.699573	7.23e-13	-1.73389	4.98e-09	-1.56867	2.08e-09	-1.59116	8.2e-12	-1.97482	1.77e-13	-2.29897	10586744	Anxa2
1.89837	1.23561	1.90925	0.270215	-0.461264	0.344734	3.42603	3.51282	3.30883	1.88878	1.98167	1.8188	3.30505	2.86715	3.54463	-1.04785	-1.32343	-1.0555	-0.783171	-0.0336075	-0.492794	-0.939563	-1.01588	-1.10703	0.000187277	-1.79	0.00012145	-2.37279	0.00107072	2.00841	0.036416	1.30268	0.00229318	1.88698	10452316	C3
-2.21607	-2.06775	-1.96794	-2.22764	-2.23036	-2.16174	2.04591	1.59486	1.81422	1.97243	1.5285	1.69418	1.33099	1.66785	2.14113	-0.0162325	0.517332	-0.451201	0.407486	0.413966	0	0.693689	-0.394625	-0.388323	3.99e-18	-3.92027	1.39e-14	-3.85857	1.52e-08	-2.16188	1.11e-09	-2.41907	3.06e-08	-2.1155	10490923	Car2
-2.52878	-2.89322	-2.50165	-0.796323	-1.12453	-0.76587	-1.268	-1.48374	-1.17332	0.672503	0.297041	0.560837	-0.167206	0.392397	0	0.593579	0.556341	0.310199	1.6363	1.47483	1.46493	-0.345841	-0.258209	-0.299339	0.000479306	-1.36928	0.000276301	-1.84346	1.59e-05	-2.2551	8.9e-09	-3.29375	0.00429688	-1.46727	10536499	Cav1
-3.90152	-4.57246	-3.67535	-0.824614	-1.51824	-0.543853	-2.35663	-2.49495	-1.6212	0.68541	0.543853	1.78638	-0.436055	0.0283909	-0.29323	-0.431519	-0.311669	0.242906	0.126465	-0.0273209	0.0617333	0.200502	0.39764	0.502287	0.00407406	-1.92982	0.00891235	-2.27237	0.00878166	-2.33925	0.00411083	-2.55963	0.001396	-2.87282	10439651	Cd200
-1.63085	-1.47508	-0.981309	-2.6239	-2.43206	-1.76829	1.56764	1.72306	1.47468	1.25546	1.16542	1.02768	1.45768	1.39423	1.31618	0.153157	0	-0.390131	1.19471	1.39362	1.37628	1.71433	1.83281	1.65101	2.92e-13	-3.18757	1.92e-10	-3.20794	3.39e-05	-1.73959	1.55e-10	-3.14012	7.6e-12	-3.5513	10362896	Cd24a
-3.96237	-4.71739	-3.65367	-1.12596	-1.7578	-0.936621	-1.85403	-2.30646	-2.1311	0.890649	0.413465	0.521579	-0.396999	0	-0.212758	0.416402	0.497823	0.274054	-0.421684	-0.47025	-0.51756	0.106463	0.429787	0.365544	0.0010159	-1.94798	0.00114953	-2.48905	8.69e-05	-3.0884	0.00412487	-2.22247	0.000148325	-2.9929	10352905	Cd34
-1.83063	-1.90145	-1.6125	-1.48323	-1.50251	-1.43684	-0.0944729	-0.000747	0.169034	0.343145	0.38925	0.690082	-0.581905	0.0572901	-0.472141	0.470714	0.280358	0.287794	0	0.198402	0.324899	-0.800909	-0.287899	-0.32995	1.97e-10	-1.87724	4.15e-05	-1.29561	1.3e-08	-1.97415	9.8e-08	-1.80229	0.000242849	-1.15494	10561008	Ceacam1
-1.52279	-1.45899	-1.40882	-0.420768	-0.721232	-0.34421	-0.169357	-0.460858	-0.425555	1.10089	0.661496	0.680061	-0.149003	0.0359807	0.289581	0.685728	0.737529	0.223303	0.0964198	0.140734	0.0626102	0.147502	0.248059	0.332982	0.000128018	-1.21058	0.00813351	-1.03832	0.000170489	-1.52832	0.00742241	-1.07939	0.00262789	-1.22232	10365290	Chst11
2.30215	2.38972	1.86344	0.292465	0.160618	-0.0613775	0.804324	0.511464	1.1147	-0.586732	-0.687006	-0.643895	2.47612	2.52077	2.65125	-0.314696	-0.454544	0.0108166	-0.362643	-0.880733	-0.903832	-0.368735	-0.4752	-0.124665	0.00682733	1.07236	0.00704249	-1.39155	0.00769238	1.41064	0.000418299	1.87357	0.00585695	1.4807	10430302	Csf2rb2
-1.6423	-1.1179	-1.38754	-0.970744	-0.790994	-0.809229	-0.430019	0.7915	0.252163	0.0851154	1.34334	1.15287	0.965744	0.139563	0.125222	0.386934	0.618386	0.401375	0.897016	1.00473	1.09531	1.53155	0.0607147	0	9.18e-05	-1.65228	0.00360492	-1.52996	0.0030391	-1.58868	9.35e-05	-2.1188	0.002276	-1.65054	10506571	Dhcr24
2.23665	2.28963	2.8209	1.13774	1.24178	1.82427	-0.304219	0.0400591	0.0787549	-1.12345	-0.819632	-1.05838	-0.200733	0.729549	-0.0919213	-0.444515	-0.0549345	-0.26256	-0.218118	-0.25417	-0.225531	4.8698	5.00884	5.10118	3.02e-11	2.45631	5.9e-06	1.77953	1.03e-07	2.17916	1.32e-07	2.15777	3.87e-11	-3.06811	10502081	Enpep
-2.12691	-2.38649	-2.05257	-1.42488	-1.663	-1.37007	-0.516476	-0.84263	-0.528502	0.194685	0.0118952	-0.0118947	-0.753663	0.667157	0.089303	1.41282	0.516527	0.716705	0.104004	0.240056	0.408108	0.147006	0.323772	0.222261	1.59e-07	-1.55517	7.48e-07	-1.83825	7.89e-11	-2.71934	4.58e-08	-2.08804	6.36e-08	-2.06833	10404702	Gcnt2
1.76864	1.86157	1.30982	1.9104	1.89433	1.18986	0	-0.712624	-0.352104	-0.426459	-0.885227	-0.662199	-0.399881	-0.126763	-0.681788	0.0783811	0.036222	0.616981	3.18609	3.00956	3.52254	-0.014914	-0.0448623	0.202169	1.64e-12	2.16221	3.19e-09	2.05858	4.82e-06	1.41191	5.75e-07	-1.58362	4.78e-07	1.60831	10536794	Hilpda
1.51009	1.4124	1.74629	0.0245256	-0.0245256	0.142973	4.29378	4.13897	4.43133	2.89657	2.8254	3.03104	3.55882	1.14323	3.33603	-0.267108	-0.538134	-0.340158	-0.324339	-0.37051	-0.360819	-0.536529	-0.667451	-0.487484	3.91e-09	-2.80089	0.000332172	-1.8774	0.0248237	1.18376	0.0298841	1.15385	0.0109613	1.36578	10559207	Lsp1
-4.47347	-5.10037	-4.33535	-2.87028	-3.53078	-2.61642	-0.910363	-0.80141	-0.670467	1.08595	1.12996	1.34461	-0.72387	-0.178295	-0.588861	0.274785	0.176029	0.2669	0.00789642	-0.0948987	0.14581	0.0903335	0.261122	0.235792	3.44e-12	-4.01749	8.84e-08	-3.3241	6.43e-10	-4.06035	3.23e-09	-3.84071	1.43e-09	-4.01686	10429568;10429573	Ly6c2;Ly6c1
1.93995	1.72803	2.48844	1.52425	1.45764	2.21646	-0.506141	-0.61625	-0.488999	-0.779204	-0.903659	-0.906996	0.187719	0.276012	0	-0.757256	-0.708282	-0.748993	3.07828	3.21859	3.19613	4.68088	5.00273	4.98077	5.84e-17	2.59267	2.4e-09	1.73788	1.84e-14	2.63064	1.16e-06	-1.27187	5.77e-16	-2.99566	10486041	Meis2
-1.64187	-2.24127	-1.8445	-1.20635	-1.7866	-1.23607	-0.712077	-0.296185	0.081089	-0.0269928	-0.0451779	0.648375	0.499096	0.708837	0.325052	0.0870542	0.213436	-0.041709	0	0.108254	-0.00733852	-0.256217	-0.151042	-0.1538	2.07e-09	-1.60095	6.67e-10	-2.17044	5.27e-08	-1.7457	1.03e-07	-1.69308	1.94e-06	-1.47242	10354506	Mfsd6
1.89995	1.77449	1.94211	0.921541	0.983171	1.14548	3.66613	4.82082	3.78008	2.97608	4.14562	3.2811	0.538259	0.140109	0.136913	-0.0559406	-0.000903	0.137111	0	-0.0873351	-0.149431	-0.025135	-0.0842562	-0.296577	7.31e-09	-2.33385	0.00745698	1.1727	0.00161382	1.4177	0.000712073	1.52338	0.000506081	1.57978	10380135	Mir142
-2.97687	-2.63718	-2.76615	-1.19423	-1.01558	-0.846799	-0.111339	-1.17403	-0.271347	1.79752	0.465827	1.35058	-0.480519	-0.108047	-0.419372	0.11677	0.373648	-0.065876	0.130103	-0.0604057	-0.457447	0	0.474295	0.320571	9.11e-07	-2.24901	0.00344833	-1.57016	0.000207778	-2.04765	0.00118785	-1.77689	0.000100728	-2.17109	10593198	Nxpe2
-3.09405	-3.26697	-2.38081	-1.21308	-1.27593	-0.927601	-1.60039	-1.57259	-2.04639	0.0372853	-0.0916481	-0.472587	-0.702323	-0.0510406	-0.73881	0.604626	0.602961	0.388231	0.373055	0.468557	0.3563	0.294716	0.313953	0.438239	0.00745885	-1.06869	0.00347154	-1.52902	4.18e-06	-2.55835	1.02e-05	-2.42571	1.72e-05	-2.37538	10476401	Plcb1
-1.59484	-1.56455	-1.22592	-0.991011	-0.857983	-0.565237	-0.118994	-0.69486	-0.0185242	0.459695	-0.162786	0.586721	-0.0258341	0.492512	0.448469	-0.0383668	0.0336981	0.633109	1.50127	1.21976	1.1881	1.36926	1.5829	1.51082	0.000936423	-1.1418	0.000528854	-1.43831	0.000573753	-1.34274	1.35e-08	-2.4363	1.66e-08	-2.62091	10356082;10587792	Plscr1
1.04604	0.99193	1.55637	0.970585	0.944447	1.85346	-0.113476	-0.236428	-0.386783	-0.200886	-0.385461	-0.472393	0.0978532	0.3201	-0.490563	-0.430131	-0.255429	0	-0.184696	-0.279093	-0.0110722	3.1529	3.03065	2.7309	7.93e-08	1.52638	0.000147312	1.25134	1.64e-05	1.45566	3.44e-05	1.38543	7.02e-07	-1.74435	10417713	Rarb
1.28198	1.42846	1.10275	1.15342	1.22915	0.853827	0.0413308	0.105154	0.158316	-0.00528812	-0.052259	0.00576544	-0.0870094	-0.0632725	-0.0278015	-0.121739	-0.159766	0.0989122	3.16467	3.25781	2.88992	-0.280365	-0.158336	-0.20618	1.06e-13	1.13276	9.92e-12	1.23429	3.83e-12	1.2358	6.19e-18	-1.9292	1.91e-13	1.38989	10506254	Raver2
-1.6224	-1.74505	-1.56204	-1.8439	-2.04073	-1.81065	0.481515	0.740768	0.695052	0.372275	0.699616	0.657	0.147678	0.0625858	-0.0293007	-0.239241	-0.227319	0.0459185	-0.530253	-0.375347	-0.342481	-0.010478	-0.054553	0.114943	4.53e-20	-2.3785	2.93e-13	-1.83112	2.15e-12	-1.63058	2.62e-10	-1.35477	2.02e-13	-1.78743	10457640;10493990	S100a11
-4.51971	-5.49476	-4.34927	-1.11885	-2.04947	-0.943364	-2.66325	-2.25242	-2.23634	0.821464	1.23511	1.34535	-2.35986	-0.109488	-0.945257	0.666799	0.751521	0.672969	-0.588245	-0.566732	-0.464466	-0.303754	0	0.00610828	0.00122541	-2.45422	0.0446539	-1.94104	0.000169189	-3.77633	0.0108111	-2.53942	0.00298804	-2.98002	10531931	Sparcl1
-2.02156	-1.99424	-1.51453	-0.729334	-0.691151	-0.124353	-0.349314	-0.208985	-0.365615	1.0774	1.26056	1.09885	-0.264247	0.365255	-0.365205	0.310079	0.207058	-0.172347	0.603381	0.574612	0.524111	0.011045	0.0357375	0.235362	8.08e-06	-1.59801	0.00820299	-1.09113	0.00238134	-1.29412	5.72e-05	-1.74656	0.00364685	-1.27324	10361381;10361509	Syne1
0.829476	1.45651	0.519886	1.46994	1.54331	0.613037	-0.672664	-0.549791	-0.627048	-0.373595	-0.263912	-0.289826	-0.618325	-0.602514	-0.539775	3.81713	3.78949	3.4515	3.70977	3.47505	3.30948	0	0.160852	-0.0736942	5.01e-07	1.53483	1.01e-05	1.6589	6.79e-10	-2.61401	4.2e-09	-2.42607	0.00445608	1.04297	10504891	Tmeff1
0.0109777	-0.0847053	-0.206394	0.042017	-0.192779	-0.219454	0.150859	-0.384921	0.120537	0.0448923	-0.47959	0.073472	0.249763	0.238894	0.496981	0.583821	0.811178	-0.248055	-0.160347	-0.240704	-0.199672	0.125869	0	0.143697	0.95069	-0.0292643	0.433318	-0.436935	0.403858	-0.490705	0.908907	0.0918516	0.859654	-0.198245	10401667	0610007P14Rik
0.575104	0.628137	0.416559	0.764206	0.777726	0.42574	0.158165	0	-0.576345	0.248688	0.154849	-0.576241	0.0182562	0.0866098	-0.222227	-0.0935764	-0.200746	0.250508	0.090066	0.21045	-0.572908	0.991942	0.491595	0.500968	0.0126184	0.696393	0.0816807	0.637032	0.111393	0.612517	0.0746175	0.688709	0.949124	-0.0635899	10385716	0610009B22Rik
-0.212774	-0.12867	0.0254703	-0.00124359	-0.0284171	0.158365	0.0530052	0.160224	-0.376475	0.0324998	0.0719066	-0.0520806	-0.141328	-0.56424	-0.441548	-0.0327325	0	0.0773807	0.144853	0.168657	0.134599	-0.43404	-0.58058	-0.262188	0.955469	-0.0127249	0.163235	0.351161	0.891152	-0.0460943	0.557099	-0.180581	0.184988	0.394391	10383342	0610009L18Rik
-0.160906	-0.222676	-0.0639005	0.0294771	0.0625834	0.1582	0.124755	-0.300121	-0.182774	0.143875	-0.0419078	-0.167929	-0.296087	-0.132443	0.0196218	0.0219188	0.134604	0.271853	0.210185	0.373925	0.315201	-0.160303	0.0454259	0.129336	0.760146	0.0378133	0.520776	0.103433	0.274183	-0.175662	0.0289693	-0.332641	0.916013	-0.0376901	10455212	0610009O20Rik
-0.0397062	0	-0.147114	0.276985	0.311892	0.186031	-0.904982	-0.688475	-1.36801	-0.631563	-0.32336	-1.02942	-1.47482	-0.684776	-0.60883	-0.105888	-0.0556803	0.0115509	0.159465	0.149214	0.318904	0.368491	0.617084	0.546221	8.32e-06	0.922316	7.43e-05	1.02082	0.620354	0.148021	0.738423	-0.11118	0.158558	-0.412584	10384691	0610010F05Rik
0.158851	0.0951996	0.0744124	0.0548229	-0.0665569	-0.00944519	-0.446886	-0.407362	0.380921	-0.555084	-0.650415	0.368653	0.0864449	0.112327	0.368174	0.0170174	0.508285	0.235719	0.0810967	0.207271	-0.00204468	-0.255074	-0.130094	-0.0349169	0.322344	0.269576	0.739001	-0.137768	0.631041	-0.20246	0.937726	-0.044227	0.769543	0.191242	10387807	0610010K14Rik;0610010K14Rik
-0.0868783	-0.234869	-0.181796	0.0436831	-0.0575218	-0.0925355	0.380951	0.370466	0	0.491961	0.277406	0.0202227	0.00654697	-0.276937	0.272298	0.089499	0.305826	0.0537004	-0.126357	-0.139306	0.07441	0.83455	0.10221	0.168548	0.0790763	-0.358487	0.748491	-0.102289	0.408136	-0.251328	0.928892	-0.037902	0.131219	-0.470089	10442914	0610011F06Rik
0.443873	0.628427	0.344152	0.000742	0.232117	-0.0568685	-0.0986576	-0.984558	-0.261425	-0.462314	-1.24827	-0.601742	0.235351	-0.669015	-0.813855	-0.167318	-0.143017	-0.374084	0.00725555	0.123154	0.132586	0.350915	0.0875526	0.226004	0.000258074	0.874901	0.0226964	0.681247	0.119158	0.493547	0.644992	0.177742	0.958902	0.0439165	10439018	0610012G03Rik
0	-0.141436	-0.296985	-0.114526	-0.086679	-0.294774	-0.118004	0.269574	0.0653195	-0.220575	0.233528	0.0433545	0.0150585	0.215993	0.185696	-0.00692129	0.0785341	0.158267	0.0613418	-0.0065341	-0.0131893	-0.259096	-0.131185	-0.126841	0.0137678	-0.201266	0.00597853	-0.294649	0.0355889	-0.23236	0.14254	-0.169606	0.95621	0.0166408	10506054	0610025J13Rik
0.194759	-0.0892716	-0.116833	0.661528	0.0910854	0.0266552	0.276711	0	-0.0987043	0.419891	-0.0959134	0.101284	0.0188436	0.225482	0.113921	-0.13539	-0.478254	-0.14667	0.068903	-0.0565529	0.0964909	-0.171915	-0.0659204	0.0749397	0.912031	0.0274425	0.983328	0.00857162	0.198714	0.381425	0.816444	0.0917069	0.706491	0.182286	10539104	0610030E20Rik
-0.0416965	-0.111862	-0.110447	0.217381	0.117961	0.194088	-0.608864	-0.893257	-0.905785	-0.459268	-0.652584	-0.55945	-0.502382	0.0953588	-1.09927	0.184633	0.235663	0.735561	0.603147	0.613758	0.355924	0.420913	0.344538	0.51094	0.00104838	0.724105	0.051926	0.546334	0.267644	-0.341049	0.112114	-0.480039	0.287238	-0.381226	10506743	0610037L13Rik
0.106427	0.354899	0.242068	0.0486135	0.0920143	-0.00414658	0.796709	0.411237	0.0697651	0.604879	0.163456	-0.0773754	-0.0954289	0	0.010067	-0.0895271	-0.0852632	0	0.0386629	-0.0922041	-0.123091	0.10355	-0.128958	0.0358758	0.183776	-0.188132	0.391481	0.168433	0.335216	0.198243	0.35252	0.198857	0.656991	0.13649	10572960	0610038B21Rik
0.446584	0.46871	0.497168	0.297925	0.0543852	0.0172439	0.213929	0.310472	0.462445	-0.145846	0.0876861	0.244782	0.0636234	-0.184801	-0.125459	-0.100567	-0.0206246	0.0347199	0.157661	-0.0778365	0.620707	-0.174078	0	-0.161915	0.515876	0.101425	0.0506376	0.379215	0.111604	0.325826	0.819817	0.0634921	0.0543535	0.409	10478407	0610039K10Rik
-0.029254	-0.164818	-0.229141	0.246614	-0.00914049	-0.108814	-0.169988	-0.302348	-0.42832	0.00914049	-0.201724	-0.232457	-0.103421	-0.444686	-0.293083	0.521689	0.405528	0.471278	0.731741	0.386221	0.416466	0.403801	0.55459	0.491398	0.300133	0.171857	0.296127	0.231304	0.0192597	-0.515257	0.0107014	-0.560569	0.0187031	-0.532356	10527184	0610040B10Rik
0.125867	0.0565467	0.0620842	-0.114015	-0.027453	-0.00316048	0.357884	0.132822	0.209256	0.0817604	-0.0960274	0.0960312	0.137448	0	0.177674	0	0.0341287	0.0899992	-0.133874	-0.0598521	0.0412083	-0.129406	-0.251564	0	0.279329	-0.113643	0.556636	-0.0883958	0.893191	-0.024731	0.705619	0.0674841	0.453602	0.143635	10522004	0610040J01Rik
0.359422	0.196901	0.142973	0.679944	0.556572	0.592802	-0.471685	0	-0.742737	0.110352	0.413178	-0.139849	0.00908041	-1.26078	-0.49481	0.561212	0.791599	-0.13262	0.000636	-0.45269	0	0.205902	-0.188659	0.466442	0.0674907	0.559892	0.0126272	1.00361	0.980593	0.0147056	0.196134	0.57212	0.71354	0.260208	10399224	1110002L01Rik
-0.747752	-0.602519	-0.365655	-0.333068	-0.127664	-0.0703583	-0.420234	-0.321574	-0.73839	-0.126755	0.0212102	-0.25981	0	-0.0319614	0.364943	-0.0256906	0.455728	0.495501	-0.173492	0.0511189	0.198034	0.240483	0.0385275	0.218802	0.82718	-0.0669107	0.178178	-0.485497	0.0647857	-0.683015	0.325261	-0.399723	0.211022	-0.54044	10440840	1110004E09Rik
0.305649	0.0661478	0.0552359	0.358991	-0.0266972	-0.00163078	-9.92e-05	-0.807089	-0.894984	0.194125	-0.884904	-0.91695	-0.0198421	0.276902	0.266213	0.0219097	0	0.287421	0.00755405	0.085249	0.0264978	-0.0456972	0.235405	0.338739	0.00914735	0.677933	0.91294	-0.0481416	0.962084	0.0231722	0.863624	0.0865156	0.958783	-0.0498665	10556576	1110004F10Rik
-0.0231194	-0.34061	-0.270276	-0.160424	-0.268602	-0.213621	0.0565114	-0.00865364	0.0977135	-0.163675	0.0486364	-0.10442	0.0634298	0.144167	0.115239	0.0874901	0.0718856	-0.164383	0.00802994	-0.16421	-0.146998	-0.19538	-0.052906	-0.273837	0.0668277	-0.200461	0.025641	-0.320388	0.169643	-0.211106	0.527279	-0.111716	0.910915	-0.0387344	10533003	1110006O24Rik
-0.298223	-0.35827	-0.196176	-0.218144	-0.293354	-0.0962868	-0.0762405	-0.0667014	0.328405	-0.139042	-0.0573382	0.247652	0.23561	-0.0772739	0.193332	0.28788	0.089654	0.0368681	0.0828791	-0.127049	0.0135584	-0.198864	-0.0780401	0	0.0231196	-0.282865	0.0269301	-0.360632	0.0237094	-0.381543	0.193945	-0.233205	0.535901	-0.151108	10436800	1110008E08Rik
0.80692	0.842814	0.60867	0.707102	0.58585	0.392615	0.373273	0.589485	0.283935	0.0798435	0.415579	0.0160284	0.10186	-0.526019	0.493461	0.117875	-0.201074	-0.466361	0.0263815	0	0.145017	0.310578	-0.0198183	-0.0162993	0.342759	0.364305	0.205707	0.634228	0.103801	0.840515	0.279168	0.600196	0.397845	0.565842	10477929	1110008F13Rik
0.942514	1.25003	0.586374	1.14428	1.35828	0.661318	0.194302	-0.10656	-0.22556	0.223375	-0.111944	-0.127736	0	-0.239729	0.345911	-0.712367	0.113869	1.0997	-0.245836	-0.335005	-0.542624	0.561563	0.077405	0.507666	0.000497355	1.01615	0.00946968	0.955073	0.0304656	0.823401	0.00032656	1.36496	0.162618	0.608255	10395807	1110008L16Rik
-0.288013	-0.0888429	-0.191132	-0.287067	-0.0981288	-0.160626	0.356786	0.602276	0.190331	0.346476	0.364443	0.166677	-0.103325	0.268723	-0.18977	0.0920787	-0.120292	0.124584	-0.266869	-0.121689	0.0305867	-0.148811	-0.20493	0	4.31e-05	-0.523467	0.272135	-0.177511	0.195425	-0.217759	0.754436	-0.066311	0.833103	-0.0677215	10481621	1110008P14Rik
0.622206	0.335967	-0.12974	1.15297	0.955292	0.429391	-0.572372	-1.43507	-0.44015	-0.0392697	-0.977903	0.15353	-0.490151	0.117634	0.223504	0.92458	0.503031	1.1452	0.305814	0.0311313	-0.0222838	0.225868	0.538241	0.679412	0.00925053	1.11289	0.342024	0.610685	0.660556	-0.296589	0.486438	0.456127	0.949864	0.0798408	10371904;10599951	1110012L19Rik
-0.152437	-0.160541	-0.0721531	-0.163545	-0.255584	-0.107918	0.0943461	-0.156956	-0.162905	-0.0562754	-0.21276	-0.158343	0.00792551	-0.0140772	0.0306401	-0.195298	0	-0.192936	0.0900474	0.106262	0.139818	-0.0982857	-0.0861015	0.13807	0.631992	-0.0432143	0.148077	-0.160193	0.878716	-0.0226185	0.0196224	-0.264072	0.343375	-0.136591	10512254	1110017D15Rik
-0.0646605	-0.0963092	-0.33996	-0.0310135	-0.179627	-0.238457	-0.104391	0.00342369	0.0235252	-0.0382519	0.00886536	0.06462	-0.0997896	0.438338	0.079505	0.0901537	0.10644	0.163731	0.104887	-0.0173183	0.107427	-0.0943317	-0.125374	-0.135635	0.519339	-0.151303	0.328549	-0.297689	0.397362	-0.278446	0.53414	-0.223336	0.961886	-0.0398908	10420889	1110020C17Rik
0.104966	0.0858316	-0.0304413	0.767763	0.780351	0.657598	-1.13137	-0.543809	-0.57078	-0.450267	0.164794	0.0117693	-0.24729	-1.67633	-2.19471	0.751852	0.655701	0.330963	-0.0946178	-0.139195	-0.62877	0.503491	0.0479002	0.189135	0.0332484	0.814288	0.000568196	1.76712	0.774924	-0.18516	0.222048	0.681873	0.901362	0.147503	10593421	1110032A03Rik
-0.0793061	-0.340069	-0.135248	-0.185139	-0.312619	-0.0994701	0.0922036	0.154475	0.0304165	-0.0717983	0.0608592	0.07619	0	0.157737	0.0305328	0.138219	0	0.0638485	0	-0.0954652	0	-0.273505	0.145686	-0.20759	0.0127194	-0.249033	0.0509269	-0.254732	0.0566186	-0.259331	0.277448	-0.160153	0.731997	-0.0801721	10492556	1110032F04Rik
-0.078155	0	0.102706	0.0851836	0.160538	0.346803	-0.443741	-0.0824127	-0.496778	-0.0547337	0.173604	-0.170639	0.307301	-0.442776	-0.464662	0.993035	0.964387	0.951295	0.669579	0.456437	0.934204	-0.295157	0.0441155	-0.174583	0.0665604	0.281963	0.138163	0.302892	4.34e-05	-0.866726	0.00492051	-0.583894	0.3647	0.244721	10476349	1110034G24Rik
0.252166	0.198472	-0.232653	0.275785	0.316055	-0.182929	1.23105	0.466114	0.265943	1.33621	0.263677	0.380414	-0.464077	0.0645161	-0.161451	0	0.0741849	-0.221898	-0.0657506	-0.0519252	-0.102084	0.230545	0.160779	0.178781	0.00242654	-0.552751	0.224088	0.291487	0.58267	0.15372	0.538042	0.177736	0.868356	-0.0855523	10551714	1110035H17Rik
0.0137148	0.251407	-0.11109	0.34351	0.517055	0.193622	-0.154363	-0.429499	-0.0185223	0.272636	-0.141738	0.171933	-0.42335	-0.416253	-0.118695	0.204423	-0.0137253	0.174522	0.275467	0.0775614	0.243074	0.048666	0.35645	0.221954	0.478658	0.229198	0.27415	0.53751	0.951088	-0.00211701	0.92111	-0.000249385	0.946097	-0.0709605	10503283;10503303;10503305	1110037F02Rik
0	-0.209414	-0.0104332	0.0834246	0.0891399	0.231373	-0.32206	-0.457574	-0.251594	-0.14465	-0.0210595	-0.237876	-0.183008	0.331348	-0.324856	-0.450596	0.00638199	-0.691206	0.532031	0.507448	0.595055	0.1294	0.160198	0.280263	0.0665999	0.269817	0.689695	0.0895207	0.0412737	0.409155	0.00981568	-0.514163	0.600592	-0.159272	10425024	1110038F14Rik
-0.0182924	-0.0106578	-0.293001	0.167901	0.232349	-0.108552	-0.506679	0.0947752	-0.255166	-0.303679	0.108116	0.00708818	0.0912595	0.0173163	0.123108	0.0953951	-0.135659	-0.110706	0.29863	0.223335	0	0.210846	0.0975189	0.114802	0.238884	0.137549	0.632248	-0.0822704	0.822182	0.0452812	0.298812	-0.179031	0.512485	-0.146098	10485013	1110051M20Rik
0	-0.103684	-0.144976	0.465285	0.463099	0.330417	-0.389423	-0.305465	-0.931683	0.0381355	-0.0381346	-0.581755	0.187729	-0.305788	-0.0311375	-0.143974	0.0269442	0.340706	0.686566	0.615321	0.219832	0.320079	0.460168	0.460197	0.0290002	0.536411	0.540807	0.218089	0.827526	0.0937983	0.365421	-0.338883	0.642853	-0.245124	10466676	1110059E24Rik
0.292907	0.41646	0.154254	1.03454	1.21144	0.808825	-1.00578	-0.0609837	-1.10285	-0.452381	0.147756	-0.437196	-0.306318	0.0828629	-0.648132	0.201825	-0.190685	0.838625	0.0732842	0.0185199	-0.359754	0.129571	0.318392	0.355714	0.000730084	1.13831	0.0267926	0.9436	0.449611	0.369816	0.104508	0.742388	0.549747	0.385179	10597913	1110059G10Rik;1110059G10Rik
-0.155394	-0.321429	-0.16665	-0.258823	-0.581652	-0.350017	-0.0136266	0.191694	0.0865369	-0.12614	0.0932202	-0.179815	0	0.028563	0.0422244	0.00342035	0.0185843	-0.040905	-0.0205092	-0.00554466	-0.110005	-0.348099	-0.26911	-0.364062	0.000390646	-0.314306	0.00336208	-0.329257	0.00894679	-0.299361	0.0242367	-0.260308	0.941543	0.0214297	10516238	1110065P20Rik
0.398253	0.60876	0.556344	0.345686	0.635874	0.63097	-0.00752544	-0.0385041	0	0.0785575	-0.00962305	-0.00122595	-0.417471	-0.0136628	0.012404	-0.445428	-0.604034	-0.287227	-0.404629	-0.193882	-0.339714	0.206294	0.30883	0.0603819	1.08e-06	0.525702	1.18e-06	0.668891	2.19e-10	0.974878	7.96e-09	0.842057	0.0106134	0.337479	10595702	1190002N15Rik
-0.062665	-0.302127	-0.340885	-0.179707	-0.298031	-0.264512	0.204293	0.00867224	0.0872488	4.77e-06	0.0256343	-0.109134	0.0934458	-0.0979915	-0.0397191	0	0.016355	0	0.110821	-0.104033	-0.241434	-0.276864	-0.311215	-0.124909	0.00135872	-0.277441	0.0401091	-0.226566	0.0308516	-0.246773	0.17715	-0.163106	0.991295	-0.00365854	10582196	1190005I06Rik
-0.265785	-0.00208855	-0.312747	-0.188682	-0.0748935	-0.162643	0.0950708	-0.0651789	0.213534	0.165775	0.0627255	0.0379062	0.0301685	0.0110793	-0.0118618	-0.0680223	-0.105205	-0.151452	0.22382	0.028213	-0.116946	-0.113797	-0.176475	-0.306165	0.0160583	-0.252779	0.205291	-0.177602	0.731462	-0.0595802	0.153752	-0.212836	0.928814	0.0310056	10371293	1190007I07Rik
0.034492	0.000767	0	-0.3233	-0.280809	-0.42714	1.17945	0.544664	0.670349	0.285223	-0.0430832	0.155554	0.340071	0.314169	0.0933137	-0.145507	0.017159	-0.207315	0.0889549	0	-0.25646	-0.19977	-0.10396	-0.207735	0.037312	-0.631357	0.317523	-0.415183	0.921921	-0.0541106	0.851673	-0.110163	0.997367	0.0044901	10596166	1300017J02Rik
0.155425	-0.145873	-0.163746	0.118935	-0.203316	-0.21897	-0.210134	-0.0849381	0.140085	-0.190385	-0.132509	0.0342236	0.039463	-0.123693	-0.280199	-0.0634429	-0.061671	-0.0595281	0.0504641	0.221823	0.0716784	-0.254822	-0.119392	-0.204218	0.15501	-0.00231453	0.216508	0.0452189	0.347541	-0.01471	0.487043	-0.190912	0.843752	0.116553	10519179;10519181	1500002C15Rik
-0.233876	-0.204884	0.0787368	0.286316	0.358225	0.594971	-0.0303526	-0.536057	-0.928511	0.394909	-0.00303173	-0.167601	0.399403	-0.117455	2.03971	-0.104049	-0.27874	-1.17236	0.25042	0.444826	0.749785	0.388894	0.324137	0.305232	0.417092	0.358355	0.276039	-0.627303	0.276718	0.664963	0.639647	-0.335096	0.877419	-0.192839	10568601	1500002F19Rik
-0.0979881	-0.307993	-0.253532	-0.206201	-0.662288	-0.544029	0.0144277	0.0753694	0.215191	-0.313049	-0.130588	-0.130809	0.165968	0.314236	0.0993977	0.125999	0.102642	-0.00196266	-0.12971	0.0354552	-0.107933	-0.246646	-0.175824	-0.186246	0.00495209	-0.300429	0.000162216	-0.538539	0.00308074	-0.420898	0.0561329	-0.277943	0.472779	-0.142433	10425723	1500009C09Rik
0.242615	0.187199	0.362004	0.327756	0.247667	0.382224	0.050806	-0.00835323	-0.0365362	0.0291638	-0.0460897	-0.0833516	0.175443	-0.234658	0.0118027	0	-0.174636	0.290544	-0.028204	0.0582724	-0.20829	-0.0139484	-0.099915	0.107605	0.0110727	0.307304	0.0514027	0.307382	0.13057	0.252941	0.0326927	0.350984	0.101678	0.293664	10532892	1500011B03Rik
0.328301	0.321891	0.363796	0.441104	0.331899	0.3476	-0.203447	-0.247868	-0.253044	-0.174327	-0.135047	-0.287215	0.0336151	0.36621	0.833725	-0.445694	0.50978	0.497816	0.320844	0.319272	0	0.553788	-0.0686569	0.13565	0.051501	0.57259	0.912129	-0.0554182	0.730134	0.168464	0.792717	0.142393	0.858553	0.148838	10487476	1500011K16Rik
-0.0364652	-0.105518	-0.0778856	-0.0162759	-0.0599012	-0.0683827	0.0163612	0.184106	0.0093646	-0.0279779	0.252486	0.0473962	0.00450945	0.0345015	0.0830355	0.0386844	0.0501318	0.071547	-0.0431204	0.00593662	-0.0176825	-0.180436	-0.11774	-0.0546026	0.0329426	-0.141028	0.257722	-0.10142	0.224685	-0.114193	0.711557	-0.0424494	0.709813	0.0568548	10461975	1500015L24Rik
-0.084599	-0.0218067	-0.222235	-0.0376988	-0.131765	-0.30176	0.197033	1.71174	0.149099	0.100342	1.4141	0.223026	0.0385222	0.257298	0.393433	-0.159252	0.0793657	0.275936	-0.0517907	0.0673823	-0.16886	-0.309212	-0.275258	-0.156161	0.0012848	-0.765868	0.244523	-0.363062	0.583766	-0.198661	0.854608	-0.0822212	0.863752	0.113566	10345921	1500015O10Rik
-0.124925	-0.058435	-0.169233	-0.105283	-0.127998	-0.265156	0.33639	0.176972	0.458112	0.392718	0.0443425	0.350767	-0.00252056	-0.0463653	-0.040472	0.75671	0.231218	0	-0.104203	0.0598164	-0.000678	-0.158143	-0.0278149	-0.18263	0.00728397	-0.435055	0.639841	-0.112052	0.030659	-0.471148	0.639513	-0.126817	0.977085	-0.0189759	10520268	1500035N22Rik
-0.0358858	-0.199893	-0.333373	-0.0395021	-0.223568	-0.310615	-0.0902524	0.155503	-0.250713	-0.00632668	0.176034	-0.262222	0.0525794	2.96e-05	0	-0.0816812	0.0566196	-0.10384	0.00827789	-0.0178461	-0.220399	-0.408126	-0.220007	-0.268921	0.102071	-0.144143	0.0733127	-0.208009	0.241032	-0.147505	0.403145	-0.113817	0.528496	0.108545	10448316	1520401A03Rik
-0.119612	-0.244422	-0.102881	-0.275011	-0.392295	-0.273964	0.0926881	0.180473	0.656297	-0.0572548	0.212921	0.390033	0.112091	0.672892	0.136258	0.0389333	-0.0949931	0.146146	-0.0519919	0.0454621	0	-0.232023	-0.1731	-0.0979018	0.000522533	-0.480557	0.0021622	-0.541777	0.155443	-0.264726	0.232311	-0.232521	0.858943	-0.0670223	10448495	1600002H07Rik
0.187181	0	0.00159311	0.00977707	-0.0509667	-0.153987	0.278274	0.127821	-0.164909	-0.00186348	0.0052495	-0.295689	0.00159311	0.319416	-0.129526	-0.206388	-0.0918808	-0.146019	0.0901113	0.1574	0.173856	-0.0258188	-0.0581822	0.116182	0.958518	0.00745257	0.724354	-0.0648949	0.405322	0.147029	0.448684	-0.141523	0.980284	-0.011794	10364718	1600002K03Rik
0.29473	0.0980635	0.035079	0.560596	0.542107	0.311736	-0.366201	-0.149307	-0.62413	-0.0959239	0.00160599	-0.251474	-0.194776	-0.121024	-0.197036	0	0.0897064	0.179289	0.172612	0.246183	-0.189052	0.131111	0.240533	0.300211	0.000417213	0.554624	0.0155602	0.477997	0.32124	0.217387	0.306077	0.23047	0.838876	0.0831002	10441919	1600012H06Rik
-0.0217276	-0.205964	-0.202375	-0.105843	-0.231839	-0.12951	0.196831	0.184984	0.0880323	0.189327	0.267675	0.0194912	0.0443578	0	0.0457473	0.123489	-0.0217276	-0.0640645	0.00945902	-0.00471735	-0.273488	-0.232671	-0.197014	-0.178167	0.000431422	-0.307266	0.10429	-0.179578	0.167314	-0.162109	0.67402	-0.0599611	0.805918	0.0530743	10359293	1600012P17Rik
0.137598	-0.10503	-0.142514	0.0716667	-0.327152	-0.148871	0.196903	0.901955	0.670383	0.309163	0.883019	0.408163	0.399822	0.0564594	0.0818648	-0.215618	0	0.199884	-0.40573	-0.124631	-0.353477	0.00544405	-0.000988	0.224321	6.67e-05	-0.647315	0.192591	-0.265099	0.75199	-0.0804724	0.367586	0.208895	0.608806	-0.161976	10552252	1600014C10Rik
-0.00605583	-0.208339	-0.11564	-0.0346298	-0.103413	-0.0347424	0.048471	0.0752177	0.00942945	0.0415468	0.0464535	-0.021565	-0.0431037	0.00375843	0	0.0491948	-0.0660672	-0.00212622	0.19314	-0.0482373	-0.011251	-0.263322	-0.0249767	-0.258827	0.139584	-0.117062	0.537625	-0.0706882	0.524582	-0.0774704	0.273131	-0.128354	0.520679	0.0985719	10451195	1600014C23Rik
-0.193236	-0.199613	-0.28721	-0.214523	-0.178058	-0.213818	-0.0679565	0.0377626	-0.121768	-0.0148702	0.0422578	-0.105843	-0.119246	0.107677	0.0491705	0.190909	-0.0423102	-0.0806623	-0.031393	0.00972891	0.172042	-0.13833	-0.0557733	0.00601292	0.0356677	-0.176007	0.0390494	-0.226943	0.0379383	-0.237055	0.0203559	-0.264535	0.275776	-0.151713	10538169	1600015I10Rik
-0.223635	-0.236536	-0.126747	-0.418232	-0.438829	-0.159038	0.0206261	0.2348	0.177798	-0.0758591	0.118068	0.0806365	0.118165	-0.0600662	0.229127	-0.0582018	-0.0567975	-0.00523472	-0.016046	0.0823059	0.0108099	-0.240046	-0.0747767	-0.317198	1.71e-05	-0.359848	0.000448425	-0.362911	0.0300058	-0.227091	0.00486765	-0.292859	0.763809	-0.0564957	10497615	1600017P15Rik
0.377073	0.669336	0.875258	-0.20112	0.281583	0.370557	1.36447	0.88537	0.601404	0.749532	0.467034	-0.0240788	0.456688	0.162557	0.103579	-0.00804377	-0.0317731	-0.336074	-0.304257	-0.108482	-0.0782766	-0.00143337	-0.191711	0.509276	0.491171	-0.278507	0.801257	0.154507	0.354005	0.520745	0.334968	0.55912	0.753942	0.29007	10585823	1600029O15Rik
0.0550976	0.0817604	0.129083	0.0359783	0.0190744	0.092638	0.0587749	0.0425024	-0.122935	0.00306892	-0.00306892	-0.157947	0.272925	0.130679	0.123115	-0.0266008	-0.0360174	-0.385079	-0.199749	-0.246326	-0.363254	0.013072	0.0715523	0.0148106	0.231005	0.0988727	0.34253	-0.106634	0.0504489	0.218171	0.0021185	0.338715	0.882762	0.0357936	10429389	1600029O15Rik;Gm6133;Rpl17;Hk1
-0.0105886	-0.297744	-0.171414	-0.00766039	-0.328143	-0.267074	-0.0938067	0.200547	0.0501842	-0.0959535	0.0355415	-0.0314169	0.106997	0.00258207	0.0267925	-0.0707693	0.135436	0.126147	-0.0792198	0.0122824	-0.121556	-0.366787	-0.359985	-0.304071	0.0393629	-0.191287	0.0647228	-0.225895	0.0550084	-0.244042	0.414664	-0.117606	0.296624	0.163177	10520501	1700001C02Rik
-0.0574532	-0.289814	-0.0424538	-0.0708833	-0.303793	-0.0290689	-0.0390396	-0.0379028	0.138609	-0.031426	-0.0752864	0.0866589	0.0470853	0.0713983	0.0137029	0.0207553	-0.0986199	-0.0375996	-0.0554342	0.00100136	-0.0558429	-0.17026	0.0131512	-0.00969934	0.0395431	-0.13918	0.047316	-0.176306	0.344004	-0.0937562	0.353128	-0.0954857	0.576491	-0.0766414	10451559	1700001C19Rik
-0.10589	-0.143524	-0.0741916	-0.159576	-0.163425	-0.0393319	0.0718751	0.230939	0.131646	-0.0923748	0.0859652	-0.0262103	-0.175956	0.139875	-0.0154848	0.105551	0.0504231	0.414376	-0.18994	-0.228615	-0.00489807	-0.269323	-0.194765	-0.213674	0.0256339	-0.181296	0.391088	-0.0971347	0.00540027	-0.30444	0.86592	0.026828	0.461723	0.111598	10345228	1700001G17Rik
0.202677	-0.138244	-0.100699	0.282387	-0.20504	-0.0927811	-0.0476427	-0.0944638	0.214704	-0.0302301	-0.0578084	0.129851	-0.00459814	-0.188428	-0.0911779	0.0146584	0.0135536	0.0481019	-0.00147295	0.120709	0.188312	-0.157117	-0.270557	-0.00949955	0.831032	-0.0276851	0.609853	0.0861181	0.86605	-0.0340546	0.549178	-0.111133	0.541906	0.137108	10535720	1700001J03Rik
-0.030931	-0.0614395	-0.0339799	-0.106595	-0.0879521	-0.119693	0.186741	0.0249066	0.0979023	0.0845776	0.0120173	0.0137777	-0.0262547	0.131637	0.0605769	-0.149873	0.166212	-0.00978136	0	-0.0642629	-0.167495	0.0017004	0.0241957	-0.137401	0.309888	-0.143419	0.518304	-0.128752	0.742829	-0.0756175	0.98969	0.00382074	0.939082	-0.0362635	10584524	1700001J11Rik
0.143136	-0.0510707	-0.0362754	0.0919948	-0.132908	-0.060595	0.237372	0.0461946	0.127565	0.157827	-0.0459328	0.0218396	-0.151293	0.214458	0.104719	-0.127674	-0.0779657	0	0.0789132	-0.0715728	-0.072721	-0.244916	-0.387794	-0.431766	0.34982	-0.0984306	0.682206	-0.0635811	0.718142	0.0609268	0.948667	0.0141738	0.0143188	0.347205	10402608	1700001K19Rik
-0.307853	-0.441063	-0.418233	-0.116198	-0.272483	-0.363159	0.511007	0.100728	0.50041	0.628245	0.254245	0.554186	0.017705	-0.517466	0	0.164011	-0.240592	0.294707	0.252951	0.273368	0.262225	-0.2487	-0.160179	-0.269478	4.64e-07	-0.744635	0.398084	-0.153245	0.0257018	-0.392541	0.000884522	-0.58268	0.768176	-0.0937126	10468513	1700001K23Rik
0.031446	0.0294747	-0.220489	0.0269499	-0.0464239	-0.278888	0.0638757	-0.161962	0.0791774	0.0817032	-0.126992	0.0888691	1.27784	0.733718	1.37525	-0.189257	-0.333962	-0.112204	0.135842	0.113226	-0.00258255	-0.258815	-0.00777435	-0.249582	0.687306	-0.0804337	3.39e-06	-1.20526	0.64151	0.135486	0.601748	-0.158484	0.851528	0.0957354	10430993	1700001L05Rik
0.0926256	-0.0652227	0	0.00106239	-0.122718	-0.00106287	0.016418	0.131689	-0.0199413	-0.105113	0.0394258	-0.112364	-0.0257788	-0.0527611	0.0224743	0.0989595	0.00814009	-0.0159965	-0.0767694	0.0211811	-0.0051012	-0.166904	-0.220772	-0.340367	0.945424	-0.00757186	0.987069	0.00280253	0.766475	-0.0462537	0.983085	0.00434383	0.0988691	0.226795	10405964	1700001L19Rik
-0.0798984	-0.138223	-0.0924053	-0.158308	-0.1224	-0.152752	-0.0521765	0.207944	0.235518	-0.0405946	0.1619	0.143786	0	-0.0661979	0.0504026	0.145048	-0.111752	0.836733	0.0488677	-0.18396	0.0266647	-0.32577	-0.318065	-0.168347	0.0534042	-0.233394	0.493167	-0.118733	0.0113098	-0.414007	0.669232	-0.0878553	0.536965	0.14673	10481499	1700001O22Rik
0.326629	1.40117	0.303648	0.340445	1.18369	0.173367	-0.140021	0.142988	0.482338	-0.19979	0.169597	0.318041	0.0421176	0.07723	-0.350253	-0.336738	-0.255229	0.288915	-0.190433	-0.305434	-0.269369	-0.0311551	-0.19733	-0.111672	0.0126615	0.492632	0.00696834	0.698459	0.00643299	0.722508	0.000962327	0.87657	0.00637412	0.734877	10390498	1700001P01Rik
0.0415497	-0.156788	-0.120356	-0.00992537	-0.181374	-0.115559	-0.238894	0.0300593	0.086206	-0.303954	0.0360875	-0.0310001	0.244913	0.144554	0.0906148	-0.0485644	0.11645	0.367127	0	-0.00191736	-0.0679569	-0.118572	-0.250981	-0.193666	0.834511	-0.0201596	0.02447	-0.250436	0.0416799	-0.235413	0.639279	-0.0671173	0.568521	0.0973311	10539358	1700003E16Rik
-0.207579	-0.274339	-0.122756	-0.204057	-0.290928	-0.168251	-0.0336177	0.106322	-0.05024	-0.0558877	0.00486016	-0.109503	-0.028677	0.0553682	0.0241151	0	0.0294924	-0.130872	0.0595903	0.0502567	0.0359919	-0.161277	-0.187167	-0.175462	0.00708035	-0.188307	0.0114569	-0.228254	0.0591692	-0.177525	0.00505697	-0.259931	0.822423	-0.0366833	10600746;10600750	1700003E24Rik;Gm5941;1700084M14Rik;BC061195
-0.388826	0	-0.123815	-0.519566	-0.100007	-0.219918	0.0761309	0.202093	0.0979071	-0.0134101	0.114931	0.0134101	-0.120667	0.00810194	-0.0259032	-0.0375934	-0.0469365	0.153213	-0.0251608	0.100657	0.0905199	-0.465056	-0.229227	-0.380086	0.0128563	-0.307199	0.283035	-0.179199	0.148196	-0.24825	0.104202	-0.280694	0.600792	0.132767	10477551	1700003F12Rik
-0.0420895	-0.017272	0.010714	-0.0453215	-0.0402851	-0.0113235	0.00095	-0.0757279	0.00920343	0.00362682	-0.0425177	0.0418239	0.110988	-0.0236149	0.0848537	0.00925493	0.0551114	-0.0353527	0.02742	-0.0130367	0	-0.059658	-0.0471158	-0.0827165	0.83372	-0.0138227	0.301415	-0.0816719	0.723311	-0.0339341	0.783378	-0.0290573	0.790647	0.0389005	10501953	1700003H04Rik
0.16302	-0.303799	-0.123732	0.0965428	-0.274398	-0.215887	-0.22588	0	0.209312	-0.219789	0.00976229	0.0491839	0.0305233	0.215512	0.550886	-0.149571	0.0158234	-0.0887928	-0.216191	-0.195274	-0.0876703	-0.276422	-0.133238	-0.151031	0.470556	-0.0801405	0.00704086	-0.375349	0.848902	-0.0355287	0.765232	0.0566698	0.764864	0.0771883	10459799	1700003O11Rik
-0.0344534	0.022738	-0.0317788	-0.052021	-0.0193553	-0.0172343	0.0247154	0.0334163	0.0384431	0.0169182	-0.0052638	0.0417929	-0.0179486	0.0195608	-0.0115819	0.0879855	0	-0.0552239	-0.00153255	-0.045825	-0.0316219	-0.079534	-0.0456891	-0.0572505	0.755091	-0.0470212	0.937695	-0.0186942	0.891954	-0.032938	0.988355	0.00430902	0.932405	0.0388071	10501942	1700006A11Rik
-0.0222387	-0.134846	-0.0445147	-0.051868	-0.115925	-0.119509	0.00792217	0.138201	-0.0864878	-0.0874686	-0.00209951	-0.141307	-0.00568581	0.120584	0.0390067	0	-0.0338077	0.151624	0.1121	-0.058207	-0.0211716	-0.113474	-0.108682	-0.0971537	0.684059	-0.0529437	0.428436	-0.132785	0.507851	-0.120756	0.64679	-0.0923906	0.955345	0.024953	10381506	1700006E09Rik
0.591372	0.443015	0.167685	0.398588	0.345791	0.00973368	0.338917	0.108548	-0.00762844	0.152677	0.0519357	-0.154879	1.03901	0.143666	1.06957	-0.196135	0	0.0203829	-0.103454	-0.105237	-0.00891495	-0.478945	-0.316369	-0.43315	0.124257	0.244436	0.0414126	-0.424721	0.0780008	0.384615	0.0707816	0.398566	0.00067725	0.735519	10366645	1700006J14Rik
0.0333919	-0.138481	-0.0292935	0.00252819	-0.0411577	-0.0436296	-0.153392	0.0806084	-0.102344	-0.124342	0.0117588	-0.0129881	-0.0197072	-0.0112057	0.0402293	-0.0439944	-0.0249062	0.0149341	-0.0571022	0.0127449	-0.0644689	-0.0606394	-0.0584617	-0.0220647	0.924596	0.0140094	0.849896	-0.0392125	0.938502	-0.0181181	0.99966	0.000168403	0.982212	0.0109483	10572934	1700007B14Rik
-0.149939	-0.0693197	0	-0.0784888	-0.0689745	-0.0144153	-0.0107641	0.0389414	0.100355	-0.0201049	0.0063262	0.14628	0.0454006	0.0946488	-0.0175223	-0.130292	-0.050508	0.101531	-0.0612721	-0.0513387	-0.093153	-0.095366	-0.0861373	-0.121513	0.5596	-0.107029	0.690445	-0.104365	0.904769	-0.0370996	0.988931	0.00506504	0.952949	0.0374827	10523497	1700007G11Rik
-0.0661125	0.0741816	0.0511727	-0.0855608	0.0364804	6.63e-05	0.279326	0.0385814	-0.0376253	0.162575	0.040338	0.0901413	0.00428724	0.0321679	0.0653896	-0.238406	0.0395002	-0.0211458	0	-0.080183	0.149946	-0.287228	-0.197434	-0.10631	0.269541	-0.0938515	0.810214	-0.0322436	0.565544	0.0750552	0.898044	-0.0215498	0.114704	0.198696	10568512	1700007K09Rik
-0.139393	-0.195963	-0.157158	-0.234104	-0.254224	-0.181566	0.0253916	-0.00957966	0.117749	-0.00272131	-0.105843	0.0475869	0.00995016	-0.0138898	-0.125411	-0.134807	-0.0640111	0	0.107848	0.280498	0.054184	-0.129679	-0.0882869	-0.139897	0.0296832	-0.205832	0.238295	-0.150618	0.358242	-0.127462	0.0076601	-0.341245	0.742159	-0.0744472	10481272	1700007K13Rik
-0.0890093	-0.199287	-0.135187	-0.287829	-0.414806	-0.322032	0.24881	0.0302377	0.277299	0.0306282	-0.231862	0.0443296	0.186832	-0.0404863	0.182153	-0.0113306	0.168132	0.307642	-0.0229778	-0.0736928	0	-0.409736	-0.335494	-0.414984	0.0116177	-0.307932	0.0272763	-0.350858	0.0157908	-0.396173	0.238955	-0.209135	0.543144	0.145379	10568258	1700008J07Rik
0.0139194	-0.0542035	-0.050705	-0.0522351	-0.181834	-0.176021	0.106017	0.314716	0	-0.00273705	0.0667391	0.00273752	-0.00292921	-0.0800133	-0.0432491	0.0966768	0.132059	-0.0716295	0.0575991	-0.0766025	-0.18289	-0.262445	-0.311811	-0.215641	0.0785714	-0.164759	0.779835	-0.0414494	0.319859	-0.135882	0.934641	-0.0162155	0.238407	0.179786	10562767	1700008O03Rik
-0.0839553	-0.102993	-0.0622726	-0.127317	-0.160888	-0.061553	0.0140176	0.0892453	0	-0.0289235	0.0504217	0.00114012	-0.038744	0.00611401	0.0916638	0.032011	0.0712757	0.092432	0.139323	0.0746331	-0.0392962	-0.00299835	-0.189329	-0.0385618	0.285765	-0.120813	0.446848	-0.119508	0.30633	-0.165069	0.347698	-0.15805	0.956072	-0.0228666	10497181	1700008P02Rik
-0.343335	-0.0547147	-0.0577402	-0.261167	-0.0942349	-0.119281	0.514741	0.00572157	0.0712371	0.343513	-0.0266867	-0.0179443	0.18324	-0.0917191	0.0300255	0.0714574	-0.0957875	-0.0479746	0.07411	-0.0566726	-0.0289068	-0.175811	-0.202659	-0.294205	0.00640631	-0.303509	0.183766	-0.195594	0.425816	-0.130977	0.367329	-0.151256	0.808765	0.0691463	10364331	1700009J07Rik
-0.0279932	-0.00523424	0.0130572	-0.0346522	-0.102724	-0.0472302	0.00700426	0.148304	0.0288801	-0.0554523	0.00170469	0.0294423	-0.0462732	-0.0563374	0.0722823	-0.119847	0.0323486	-0.0936232	0	-0.0695834	0.0366735	-0.160046	-0.122625	-0.0816383	0.469238	-0.0607766	0.855731	-0.02402	0.852971	0.0262443	0.88419	-0.0231595	0.596391	0.087307	10503958	1700009N14Rik
-0.160042	-0.305073	-0.321843	-0.135651	-0.1406	-0.303801	-0.0438094	0.125433	-0.156937	-0.0100732	0.193255	-0.0710259	-0.162165	0	0.0238023	0.253846	0.0702858	-0.136854	0.23405	0.10328	-0.0439267	-0.392532	-0.125956	-0.168385	0.0460327	-0.233975	0.252512	-0.181714	0.0715269	-0.290261	0.0436145	-0.325636	0.99841	0.00112255	10479074	1700010B08Rik
-0.0937362	-0.0842457	-0.0762053	-0.156059	-0.15258	-0.270415	0.0307069	0.079217	0.0436687	-0.16933	-0.00178242	-0.0761423	0.00977659	0.0924692	-0.00371027	-0.0831432	-0.00717783	0	0.154439	-0.0954595	0.0479665	-0.0984402	-0.0839391	-0.13057	0.557455	-0.123263	0.548576	-0.171719	0.740616	-0.108767	0.592299	-0.174522	0.962563	-0.0345573	10531583	1700010H22Rik
0.367371	0.63355	0.0998287	0.251686	0.460171	0.0298886	0.1067	0.233584	0.0773134	0.0820088	0.0832615	-0.0512652	0.167053	-0.129117	0.346254	0	-0.257187	-0.0825319	-0.117998	-0.222906	-0.250177	0.0770187	-0.0572701	0.0874672	0.060818	0.218482	0.256985	0.179019	0.00760064	0.420322	0.00137973	0.50411	0.125749	0.271344	10441706	1700010I14Rik
-0.0281134	-0.0457425	-0.095396	0.0482712	-0.0083251	0.0360169	-0.144527	0.0606065	-0.128144	-0.0511036	0.10503	-0.0496464	0.0251732	0.105909	-0.0818429	-0.01579	0	0.0827012	0.226497	0.0251732	-0.0938368	-0.104065	0.0382404	-0.0133615	0.900686	0.0190825	0.884363	-0.0319614	0.869482	-0.0378519	0.771515	-0.0681592	0.982801	0.0108472	10554650	1700010L04Rik
-0.30198	-0.378795	-0.212632	-0.389523	-0.467565	-0.477601	0.220945	0.0778565	0.294627	-0.115422	0.00112486	0.0569592	0.0901589	0.00188494	0.11976	0.00927925	0.178338	0	-0.115568	-0.0322666	-0.175827	-0.176094	-0.25772	-0.41151	0.000681451	-0.460698	0.0100815	-0.44195	0.0141195	-0.433888	0.158363	-0.263462	0.783955	-0.0895743	10464169	1700010L13Rik
0.0886121	0.136581	0.0182653	-0.156237	0.00612402	-0.140327	0.29589	0.444777	1.02945	0.163951	0.160736	1.01135	-0.0283914	0.0369873	-0.0979757	-0.0567312	-0.0297079	0.0797982	-0.142953	-0.2032	-0.0774789	-0.29681	-0.206242	0	0.000610766	-0.525522	0.932473	0.021963	0.984822	-0.00561659	0.583273	0.133381	0.599924	0.159854	10453443	1700011E24Rik
-0.10194	-0.184636	-0.137037	0.0253573	-0.0191474	-0.024179	-0.178849	-0.217359	-0.106177	-0.134032	-0.127873	-0.0275626	-0.0936227	0.020155	-0.137898	0	-0.159026	0.0915627	0.0808597	-0.174012	0.113651	4.38729	2.33789	2.86086	0.787245	0.0583783	0.993705	-0.00314204	0.882167	-0.0511093	0.825542	-0.08043	2.2e-16	-3.26894	10419392	1700011H14Rik
-0.0951839	-0.0764284	-0.0391374	-0.109074	-0.0950122	-0.110299	-0.0391951	0.00443983	0.00674439	-0.107101	-0.00259018	0.0453	0.0560732	-0.0759335	0.000728	0.0121784	0.101753	0.00674439	-0.0212736	-0.0626555	-0.0824037	-0.0137882	-0.0588636	-0.029593	0.682228	-0.072122	0.746916	-0.081145	0.617029	-0.127748	0.92243	-0.0320782	0.918388	-0.0534408	10455866	1700011I03Rik
0.0303326	-0.0841494	-0.0506206	-0.0246749	-0.160299	-0.0443344	-0.0864925	0.228973	-0.0214682	-0.0591116	0.130357	-0.0095768	0.107018	-0.0168619	0.161453	-0.0617786	0.00795746	0	0.109286	-0.126512	0.11442	-0.305119	-0.198412	-0.151253	0.397154	-0.0860712	0.296433	-0.139494	0.826331	-0.037684	0.586072	-0.0880224	0.335313	0.162637	10579845	1700011L22Rik
-0.040833	-0.11333	-0.260927	-0.109909	-0.145417	-0.259253	-0.051456	0.194812	0.122373	-0.140191	0.0438933	-0.053421	0.131003	0	0.0967789	0.161382	0.167399	-0.233666	0.00101185	-0.100892	-0.127327	-0.404565	-0.332076	-0.285452	0.0703183	-0.17428	0.0687866	-0.230872	0.167906	-0.18665	0.62338	-0.0792091	0.234911	0.185753	10537098	1700012A03Rik
-0.202307	-0.320335	-0.130329	-0.181473	-0.26347	-0.0737967	0.0333986	0.0880175	0.0232782	0.0121951	0.0835547	0.0286174	0.0908375	-0.0485325	0.0394211	-0.0576434	-0.00556469	0.154048	-0.171623	-0.0406151	0.05128	-0.247026	-0.200526	-0.261404	0.00373375	-0.240129	0.0369717	-0.222527	0.0418926	-0.225565	0.23442	-0.141632	0.858708	0.0410335	10392476	1700012B07Rik
-0.0107055	-0.0728092	-0.153438	0.0209393	-0.0493012	-0.0961828	0.0561786	0.00411081	0.267394	0.0930109	-0.00400257	0.228768	0.00411081	0.00758553	0.0278759	0.00411081	-0.0389838	0.0544972	-0.0716596	0.000206	-0.00535679	-0.0936007	-0.104557	-0.101987	0.0686576	-0.167826	0.588965	-0.0734402	0.650296	-0.0667909	0.845093	-0.034646	0.885173	0.0397989	10590962	1700012B09Rik
0.0120578	-0.133313	-0.0574446	-0.0747542	-0.268144	-0.199366	-0.0373612	0.111089	0.18816	-0.114504	0.0207386	0.0962248	-0.00083	-0.0789757	0.0452356	0.0126672	0.0419312	-0.024754	-0.00083	-0.0951004	-0.0647988	-0.137451	-0.137049	-0.192244	0.200839	-0.164219	0.559283	-0.108637	0.504788	-0.130109	0.772069	-0.0665843	0.934739	0.0354204	10518209	1700012P22Rik
-0.089325	-0.0806723	-0.0129881	-0.117164	0.00430107	-0.0771499	-0.0708342	0.156365	0.0384946	-0.164877	0.0919361	-0.0100903	0.0484152	-0.0409245	-0.000391	0.00354338	-0.0661082	0.00354338	-0.0301471	0	0.093718	-0.379178	-0.217532	-0.316481	0.417061	-0.0689988	0.59215	-0.0645329	0.756418	-0.0424925	0.527279	-0.0833567	0.0364848	0.242231	10547697	1700013D24Rik
-0.111814	-0.0557566	0.0462346	-0.0475774	-0.0785842	-0.00109816	0.00224543	0.139437	-0.0316262	-0.0342312	0.147305	-0.061882	-0.0220509	-0.0138898	-0.00781059	0.00868654	-0.0589314	-0.0102358	-0.0568266	0.050148	-0.0995078	-0.199347	-0.0892072	-0.224513	0.347263	-0.0683072	0.812884	-0.0268489	0.864859	-0.0212724	0.969556	-0.00603715	0.266018	0.12959	10495332	1700013F07Rik
-0.143365	-0.102229	-0.115541	-0.193964	-0.0676589	-0.0628161	-0.267748	0	0.113429	-0.229834	0.0291324	0.0926471	0.274911	0.0863085	0.0341778	0.0711093	-0.0269427	0.181667	0.0673017	-0.0606232	-0.0175939	-0.0173712	-0.0725842	-0.0900049	0.41219	-0.0705334	0.0233245	-0.246062	0.0970268	-0.18954	0.382864	-0.110624	0.797127	-0.0542756	10509277	1700013G24Rik
-0.0334101	0.038651	-0.047513	-0.0555215	-0.0083394	-0.0531402	-0.0642767	0.0933757	0.001369	-0.0391789	0.0268063	-0.033536	-0.0339251	0.0963669	-0.00788927	0.33565	0.849462	0.337746	-0.0724039	-0.0740104	-0.0130258	-0.0446858	-0.0705194	-0.0108767	0.881787	-0.0239721	0.844002	-0.0447297	0.00422832	-0.534165	0.925937	0.0266012	0.978641	0.0154818	10604643	1700013H16Rik
-0.0872517	-0.221744	-0.31028	-0.145636	-0.363924	-0.334099	0.192747	0.0168648	0.104812	0.0725059	-0.0302572	-0.00141191	0.017684	-0.0519729	0.124371	-0.270958	0.151071	0.179159	-0.0395837	0	-0.0736375	-0.579851	-0.391463	-0.263014	0.0117518	-0.303032	0.0822763	-0.27385	0.11161	-0.263579	0.239216	-0.206082	0.44886	0.16762	10479945	1700014B07Rik
-0.243404	-0.11586	-0.0295363	-0.272726	-0.182896	-0.0893874	0	0.221876	-0.0519972	-0.0509415	0.0328956	-0.107811	0.121638	-0.0231142	0.0472817	-0.00765944	-0.147542	0.176825	-0.0670838	0.109489	0.0723786	-0.138255	-0.0699234	-0.183158	0.0432952	-0.162972	0.0540957	-0.204237	0.149365	-0.162843	0.0861232	-0.193896	0.924112	-0.0251892	10409796	1700014D04Rik
0	-0.117972	-0.437079	-0.0114851	0.0491118	-0.289667	-0.0972514	0.0261464	-0.192517	-0.0185976	0.124296	-0.192302	0.029645	-0.10237	-0.0603914	-0.171828	-0.0462942	0.192986	0.389737	0.416931	0.522038	0.230246	0.290957	0.53554	0.5091	-0.0761443	0.573942	-0.0901433	0.441228	-0.126137	0.000106213	-0.577417	0.00105158	-0.486763	10351482	1700015E13Rik
0.160077	-0.19507	-0.270418	0.0955744	-0.216851	-0.357399	0.104147	0.249753	0.17228	0.00140047	0.0948267	-0.0956159	-0.00035	-0.108545	0	-0.118127	0.0376453	0.00387287	-0.0995803	-0.101468	-0.0630465	-0.367446	-0.262835	-0.321243	0.103328	-0.21848	0.637179	-0.0943827	0.62068	-0.105145	0.871516	-0.0426495	0.454486	0.186494	10582188	1700016A09Rik
-0.235119	-0.226203	-0.225206	-0.266861	-0.29493	-0.281216	0.0633988	0.210228	-0.0717025	-0.0106487	0.0279422	-0.111385	0.109833	-0.0581694	-0.0483565	-0.0831261	-0.164716	-0.147489	-0.140326	-0.0249844	0.296987	0.788536	0.00232315	0.00755548	0.0199525	-0.272895	0.0973158	-0.256025	0.488576	-0.123146	0.0652475	-0.298815	0.00105413	-0.521061	10352097	1700016C15Rik
0.0104713	-0.130887	-0.0915003	-0.0203257	-0.115029	-0.0689645	-0.0644994	0.0322628	-0.0222144	-0.0608053	-0.0046773	-0.028831	-0.123232	-0.0800157	-0.122168	-0.0720005	0.0287142	-0.0301228	0.061408	-0.0183654	0.0277677	-0.0940247	0.100421	0	0.64164	-0.0445784	0.77935	0.0390994	0.762648	-0.0449028	0.510479	-0.0929759	0.730474	-0.0715046	10577057	1700016D06Rik
-0.360678	-0.236942	-0.0510116	-0.209235	-0.226484	-0.0669737	-0.00976324	0.556943	-0.242705	-0.0674644	0.511783	-0.0422649	0.244288	0.00530434	0.0192008	-0.0570583	0.0943708	0	0.0655465	0	0.0226975	-0.298626	-0.3188	-0.424882	0.0105205	-0.309642	0.0753532	-0.281485	0.232106	-0.204325	0.203596	-0.221302	0.498594	0.155548	10437270	1700016D08Rik
-0.0122533	-0.248666	-0.0843944	-0.0382795	-0.287569	-0.116204	-0.0966234	0.00895166	0.062757	-0.110472	0.0115309	0.0629468	-0.00655651	0.0780897	0.0765762	-0.0406213	0	0.0811839	0.0163727	-0.0594459	-0.0159097	-0.187994	-0.148551	-0.174588	0.11623	-0.121076	0.07505	-0.180597	0.182088	-0.144749	0.337281	-0.111567	0.857294	0.0391501	10531894	1700016H13Rik
-0.269968	-0.466041	-0.129273	-0.301099	-0.40305	-0.0156341	0.024981	0.123337	0.0106907	0.0633206	0.237065	0.0523968	0	0.123337	-0.0570087	-0.00108576	-0.0460424	0.19204	0.0345073	0.194201	0.184564	-0.290106	-0.32314	-0.381895	0.000145428	-0.349476	0.0122113	-0.286287	0.00776698	-0.312481	0.000629066	-0.401935	0.745982	0.0675363	10378749	1700016K19Rik
0.118245	-0.0567656	-0.122921	0.11782	-0.044838	-0.15505	0.597897	0.340427	0.559487	0.264512	0.312429	0.593188	0.095428	-0.187138	0.374073	-0.114327	-0.231056	0.0517244	-0.168243	-0.297881	0.134714	-0.334825	-0.394621	-0.336267	0.0007689	-0.468575	0.545915	-0.118039	0.741667	0.0739681	0.710507	0.086552	0.0980067	0.331319	10593913	1700017B05Rik
0.0953488	0.00426626	-0.0403142	0.0304093	-0.0598507	-0.0884228	-0.0285072	0.0323334	0.00567055	-0.119088	-0.0362	-0.0672116	-0.0660229	0.0242906	-0.0113459	0.0554447	0.0585985	-0.00793028	-0.0104432	0.0119915	-0.0772867	-0.0374413	0	-0.0523558	0.810285	0.0257399	0.962893	0.00793218	0.779054	-0.0451315	0.939081	0.0154856	0.954043	0.0201718	10466139	1700017D01Rik
0.102824	0.0373054	0.0703583	0.00643349	-0.10557	-0.0287328	0.205617	0.236724	0.140013	0.0750446	0.0383759	0.0814295	0.0930667	-0.0675159	0.0244837	0.0256095	0.078598	0	-0.0547857	-0.0879502	-0.121036	-0.139645	-0.255929	-0.277063	0.0798772	-0.115764	0.981908	-0.00290839	0.857722	-0.0209661	0.304106	0.101694	0.0090414	0.237982	10497937	1700017G19Rik
-0.0629787	-0.124929	-0.0039072	-0.101811	-0.174138	-0.102302	0.161737	0.161149	0.0306273	0.0201316	0.047833	-0.0145922	-0.0195537	0.0145116	0.0941286	-0.015367	-0.0256281	0.00765848	-0.14061	-0.0284553	0.0187345	-0.103535	-0.032155	-0.134959	0.00470434	-0.162825	0.0959821	-0.124707	0.309307	-0.0838989	0.639008	-0.0449009	0.982725	-0.0047946	10366131	1700017N19Rik
0.169766	-0.111247	-0.0512266	0.0934448	-0.207321	-0.0892801	0.0607295	0.148604	0.0636878	-0.0743628	-0.0176706	-0.0376749	-0.0236096	-0.074193	0.0327358	1.12912	1.63966	0.559495	-0.102175	-0.0817151	-0.131875	-0.213525	-0.249554	-0.0698442	0.660067	-0.0565294	0.959018	-0.010955	8.18e-10	-1.14207	0.725338	0.0726112	0.530203	0.144997	10408525	1700018A04Rik
0	-0.157924	-0.105926	-0.134026	-0.216129	-0.26315	-0.0108495	-0.0802536	0.48965	-0.074101	-0.132343	0.231375	0.0377493	-0.0108495	0.192054	-0.0254769	-0.131745	0.0509496	0.124825	-0.0531774	0.119217	-0.40606	-0.189729	-0.354651	0.0322459	-0.216772	0.101459	-0.219177	0.469578	-0.110768	0.145782	-0.209814	0.324816	0.170621	10455531	1700018A14Rik
0.0117645	-0.275669	-0.161146	-0.0944791	-0.386116	-0.184514	-0.189502	0.173668	0.247503	-0.149488	0.0961094	0.269898	0.0341887	-0.0311079	0.21269	-0.0985165	-0.0129728	0	-0.0422015	-0.0978637	-0.327607	-0.163974	-0.241726	-0.222217	0.00607048	-0.256391	0.0360349	-0.253617	0.277326	-0.14453	0.888216	-0.0258025	0.928143	0.0276128	10582221	1700018B08Rik
0	-0.0364938	-0.0930986	0.0101643	-0.177496	-0.093545	0.0118523	0.0752058	-0.0354557	-0.0796575	0.00932026	-0.0638928	0.0155568	-0.122351	0.0412378	-0.0829101	0.104556	0.00129795	-0.0776629	0.10101	-0.142796	-0.0985837	-0.0759597	-0.118928	0.813855	-0.0513068	0.894777	-0.0432261	0.829413	-0.0727261	0.951714	-0.025262	0.964014	0.0327455	10498002	1700018B24Rik
0.0538592	0.171819	0.0700107	-0.103322	0.0814581	-0.0518846	0.0135617	0.00193691	-0.223658	-0.0160103	-0.144596	-0.297602	0.0992188	-0.00499725	0.0384035	0.0356998	-0.0222449	0.0493121	-0.19186	-0.28251	-0.131579	-0.205638	-0.351817	-0.320286	0.175629	0.148051	0.971674	-0.00721836	0.936804	0.0160677	0.120524	0.238973	0.0320611	0.32957	10513715	1700018C11Rik
-0.107685	-0.0785708	-0.215877	-0.263506	-0.120433	-0.210634	-0.137126	0.0111279	0.138375	-0.174658	0.0255494	0.0214396	0	-0.0626483	-0.0390878	-0.0280914	0.00152922	-0.157969	0.108569	-0.018683	-0.109826	-0.112014	0.0834389	-0.0502372	0.312244	-0.146902	0.51922	-0.132206	0.643811	-0.104608	0.478705	-0.159471	0.649523	-0.139847	10527427	1700018F24Rik
-0.169719	-0.381257	-0.113382	-0.484215	-0.663738	-0.356174	0.215597	0.412745	0.267967	-0.0958867	0.0985441	0.0704508	0.044251	-0.072155	0.0941787	-0.144474	0.133249	0.106144	-0.0903344	0	0.10215	-0.445904	-0.402385	-0.364275	0.000233527	-0.522984	0.0303787	-0.383506	0.0322877	-0.393054	0.0498956	-0.365353	0.922981	0.0427737	10505198	1700018M17Rik
-0.0170126	0.1393	-0.113219	-0.00833034	0.105805	-0.0684056	-0.031806	0.195539	-0.0552959	-0.0726256	0.0277214	-0.0316119	0.0245047	-0.0206657	-0.0284557	0.0283446	-0.0527515	-0.00324488	-0.0958929	-0.108496	0.026063	-0.0206657	-0.00530577	-0.057189	0.991576	0.00103625	0.917959	0.0145619	0.916734	0.0155736	0.632086	0.0657982	0.890864	0.0340765	10354534	1700019A02Rik
-0.0473666	-0.0570979	-0.0644326	-0.0316329	-0.0515609	-0.111381	0.0451455	0.133221	0.0983396	-0.00180769	0.0196638	0.0434971	0.160492	0.0325079	0.0826178	-0.0922914	0.00640822	-0.120439	-0.0179939	-0.0748038	-0.0156202	-0.00208044	-0.114389	-0.166892	0.0616085	-0.116922	0.0641782	-0.152451	0.94384	0.00819532	0.83803	-0.0244393	0.843413	0.0338751	10569757	1700019B03Rik
0.0030365	-0.168401	-0.0478458	0.0641694	-0.0188775	0.0198531	0.563041	-0.053494	0.353892	0.454855	-0.00563621	0.220401	0.0652995	-0.100012	-0.116256	0.0303154	0.0337753	0.127829	-0.128927	-0.0734367	0.151886	0.00259685	-0.106762	-0.0700278	0.00324006	-0.280187	0.869569	0.0256454	0.539761	-0.0886507	0.969691	-0.0078516	0.909927	0.0333867	10354529	1700019D03Rik
0.0122409	-0.208568	-0.124921	-0.0848112	-0.122759	-0.119999	-0.0132046	0.009377	0.229157	-0.0452876	0.0348516	0.0116639	0.0568147	0.00383854	0.110925	0.155026	0.00145435	0.0281963	-0.134585	-0.0221844	-0.0561919	0.0120425	-0.227851	-0.0731406	0.0984797	-0.145896	0.160433	-0.165329	0.171646	-0.169695	0.824084	-0.037149	0.973481	-0.0118199	10401950	1700019M22Rik
-0.197867	-0.147502	-0.270807	-0.237503	-0.269792	-0.295801	0	-0.0816078	-0.0943785	-0.115238	-0.0284953	-0.111481	0.224667	-0.12263	0.0694318	0.149946	0.17866	-0.056273	0.0581384	-0.0511994	-0.00664043	-0.116393	-0.10187	-0.15635	0.014506	-0.164679	0.0010282	-0.293702	0.000323575	-0.327323	0.00905028	-0.236645	0.332681	-0.111675	10468738	1700019N19Rik
-0.406023	-0.347481	-0.320087	-0.394092	-0.537438	-0.361521	-0.167786	0.192215	-0.0449023	-0.177452	-0.0286927	-0.0621633	-0.0344758	-0.0909219	0.00460577	0.169645	-0.0528469	0.0516734	0	-0.144362	-0.0529509	-0.284389	-0.293161	-0.29485	0.000230411	-0.34631	0.00279983	-0.354177	0.000211093	-0.450598	0.0064879	-0.32867	0.561721	-0.103641	10348074	1700019O17Rik
-0.0577765	-0.120768	-0.0908313	-0.217848	-0.158697	-0.199732	-0.209091	-0.0873957	0.00318527	-0.206068	-0.0983086	0.0321364	0.0197415	-0.162882	0.15883	-0.0932865	0	-0.117089	0.129559	0.0336976	-0.136494	-0.201215	-0.134516	-0.283942	0.656521	-0.0466853	0.263905	-0.146172	0.645404	-0.0708171	0.298601	-0.149863	0.786713	0.0656154	10476130	1700020A23Rik
-0.0381575	-0.181449	0	0.165283	-0.149689	0.015831	0.105598	-0.0935764	0.374777	0.162843	0.0333138	0.290612	0.152306	-0.235152	-0.196019	-0.00556135	-0.0174103	0.220433	0.0579386	0.00266266	0.0228062	-0.076756	0.0728021	0.00724935	0.120771	-0.176958	0.726714	0.0615915	0.586983	-0.0971843	0.773901	-0.0591662	0.932581	-0.0324622	10465103	1700020D05Rik
-0.748917	-0.541173	-0.43417	-0.406848	-0.400648	-0.242691	0.39103	0.049645	0.399601	0.78113	0.384001	0.423335	-0.250695	-0.20028	0.369178	-0.000155	0.314733	-0.0689054	0.161592	0.122426	0.0272784	-0.728923	0.0382085	-0.260598	7.78e-07	-0.867198	0.0323794	-0.435142	0.00939145	-0.544299	0.00688299	-0.566173	0.673196	-0.145304	10379685	1700020L24Rik
-0.0976253	0.0202875	-0.0689731	-0.0979996	-0.0794096	-0.070353	0.0941839	0.136287	-0.076045	0.0650721	0.110272	-0.159666	0.0218248	0.0287785	0.0372381	-0.0397987	-0.0808811	0.265721	0	-0.0924025	0.102375	-0.250755	-0.119036	-0.214913	0.388824	-0.0940295	0.53376	-0.0949593	0.474906	-0.114026	0.705181	-0.0690029	0.530288	0.129222	10362064	1700020N01Rik
0.17099	-0.1754	0.0087285	-0.076467	-0.398318	-0.180996	-0.139288	0.0991616	0.287811	-0.184248	-0.123982	0.0208817	0.125119	-0.0642233	0.148485	-0.0887232	-0.132896	-0.00189352	0	0.0118132	-0.101739	-0.240206	-0.0505314	0	0.305317	-0.101966	0.16977	-0.178371	0.842209	-0.0340726	0.630288	-0.0786018	0.976639	-0.0116645	10362062	1700021A07Rik
-0.0749741	0	-0.0916462	0.000945	0.104985	0.044652	-0.448252	-0.019845	-0.99811	-0.34023	0.137363	-0.850286	0.294828	0.0898457	0.413027	-0.379727	0.19888	0.0731325	-0.0198841	-0.0363722	0.216888	0.330088	0.0315313	0.145948	0.252686	0.41722	0.614493	-0.268573	0.961285	0.0332319	0.941862	-0.0562167	0.869352	-0.171862	10368930	1700021F05Rik
-0.0500026	-0.122246	-0.13525	-0.200712	-0.207744	-0.101643	-0.0221076	0.124743	-0.0120502	-0.0505843	0.134376	-0.155217	0.019248	0.110854	0.019248	-0.0976152	-0.069335	0	0.106878	0.031599	-0.057766	-0.300407	-0.0938692	-0.240684	0.165055	-0.13946	0.163132	-0.18605	0.609508	-0.0806161	0.270267	-0.16317	0.754299	0.0753872	10479058	1700021F07Rik
-0.216788	-0.111607	-0.100261	-0.23713	-0.141351	-0.114296	-0.10887	0.184083	0.0346355	-0.113952	0.0760002	-0.0003	-0.17178	-0.271462	0.20161	0.0621004	0	-0.0380006	-0.0126104	0.0229635	0.0289216	-0.190232	-0.105555	-0.304058	0.05087	-0.165505	0.554476	-0.0730282	0.175404	-0.161605	0.170732	-0.166664	0.841017	0.0463761	10462127	1700021P04Rik
-0.0802927	-0.219422	-0.20367	-0.197821	-0.31558	-0.414555	-0.0107455	-0.0288629	0.111907	-0.178212	-0.072741	-0.0241179	0.0861688	0.00921678	0.0705085	-0.0734153	0	0.00245571	0.026938	-0.0481763	-0.0532966	-0.199509	-0.154625	-0.19045	0.028364	-0.204762	0.0165363	-0.293855	0.0954451	-0.214904	0.103868	-0.213712	0.81589	-0.0570289	10520247	1700022A21Rik
0.156916	0.717239	0.0987716	0.0302939	0.577685	-0.0149827	0.0464349	0.383609	-0.0586743	-0.0227652	0.160623	-0.0494113	-0.0165296	-0.218762	-0.0218287	0.00676775	-0.234194	0	-0.158262	0.0880413	-0.0748687	-0.141825	-0.13072	-0.152021	0.196624	0.184351	0.0630829	0.346694	0.084732	0.336796	0.123451	0.30935	0.0475812	0.402509	10504230	1700022I11Rik
0.0664725	-0.323844	-0.247209	-0.17153	-0.617875	-0.392663	0.0765014	0.0469279	0.19641	-0.0217519	-0.200606	0.0105238	0	0.0423098	0.0271816	-0.0416651	-0.0538244	0.0033431	-0.0694871	-0.16405	-0.12934	-0.437729	-0.18417	-0.453125	0.00596564	-0.299109	0.0307329	-0.304272	0.0911522	-0.250393	0.322169	-0.160149	0.769698	0.0772334	10391854	1700023F06Rik
-0.541021	-0.269822	-0.171964	-0.316744	-0.301725	-0.219483	-0.273089	-0.017169	-0.0242224	-0.165596	-0.0660029	-0.0931649	-0.00202942	0.0308824	0	-0.0411453	-0.088335	-0.0818543	0.0381846	0.00743771	0.0246077	-0.0880513	-0.0551825	0.0150981	0.0939752	-0.196919	0.0424832	-0.313078	0.15737	-0.233015	0.04326	-0.32687	0.151221	-0.260748	10414245	1700024B05Rik;1700049E17Rik2;1700049E17Rik1;4930503E14Rik
-0.0367126	0.00411081	-0.0148773	-0.0364337	-0.00857067	-0.0419264	-0.00224114	0.0110574	-0.0352387	-0.0109615	0.000295	-0.0337324	-0.0629811	-0.0607457	0.00065	-0.0240407	-0.0135617	0.101392	-0.0355268	-0.00369978	0	0.00267744	-0.0294051	-0.0342998	0.945603	-0.0105981	0.934874	0.018624	0.848573	-0.0436648	0.974138	-0.00932614	0.997109	-0.00205914	10414241	1700024B05Rik;1700049E17Rik2;1700049E17Rik1;Gm5622;AY358078
-0.0382268	-0.0153711	-0.0310929	-0.0412779	-0.0103962	-0.0521085	-0.00508237	0.000170946	0.013828	-0.0354161	0.00711536	-0.0123007	-0.0353973	-0.0253859	0.0175142	-0.0563033	-0.0309713	0.014194	-0.0154817	0.0315054	-0.0266805	0.0139692	-0.014734	-0.0132642	0.795485	-0.0261314	0.912744	-0.0169893	0.966214	-0.00705206	0.873916	-0.02786	0.927009	-0.0267359	10414228;10414234	1700024B05Rik;1700049E17Rik2;1700049E17Rik1;Gm5622;AY358078;4930503E14Rik
-0.0675678	-0.0305314	-0.0437613	-0.0603757	-0.0150838	-0.0487518	0.0150127	0.0141788	-0.00422859	0.00139952	-0.0178633	0.00492287	-0.0506692	0.0229526	-0.0169969	-0.0419483	0	-0.0142412	-0.0713158	-0.0464001	0	0.0346341	-0.0214372	-0.0194154	0.658808	-0.0465823	0.854119	-0.0294408	0.882365	-0.0256155	0.981172	-0.00510669	0.883708	-0.0422725	10419162	1700024B05Rik;1700049E17Rik2;Gm8267;1700049E17Rik1;4930503E14Rik
-0.0559979	-0.0382366	-0.0653028	-0.0757074	-0.0394444	-0.0550036	-0.0206304	0.0671177	-0.0572452	-0.0212016	-0.00425434	-0.0655403	-0.0168409	-0.00849867	-0.0353108	-0.0246153	0	-0.0186935	-0.0449724	-0.0328326	0.022923	0.0438113	0.0239062	0.0473342	0.645694	-0.0379898	0.772194	-0.034732	0.750254	-0.0405126	0.79335	-0.0366548	0.529978	-0.0932994	10414250	1700024B05Rik;1700049E17Rik2;Gm8267;1700049E17Rik1;AY358078;4930503E14Rik
-0.157048	0.0635586	-0.11023	-0.193613	0.015296	-0.132823	0.10244	0.330322	0	-0.00789547	0.262721	-0.0656037	-0.0586963	0.089046	-0.0119863	-0.250536	-0.0922575	-0.0032711	0.037601	0.0733204	-0.0277791	-0.166323	-0.118577	-0.251235	0.0574626	-0.189474	0.524072	-0.0919311	0.867044	0.0295448	0.471904	-0.113524	0.676061	0.0929015	10418812	1700024G13Rik
-0.495361	-0.140056	-0.0920773	-0.393687	-0.1044	-0.122156	-0.10238	0.0992293	-0.10128	-0.054122	0.0336695	-0.0336904	-0.0983629	-0.0824933	0.0159197	-0.0180311	-0.189994	-0.0417986	0	0.192319	-0.197901	0.0733385	-0.0246091	-0.0779901	0.272927	-0.198194	0.506603	-0.169644	0.615546	-0.141348	0.42008	-0.222762	0.539071	-0.214869	10385555	1700024J04Rik
-0.0332556	0.324302	-0.0116463	-0.0422783	0.19633	-0.0435166	-0.0680952	0.00327396	0.0203624	-0.104681	-0.0388303	-0.0506906	0.0931597	-0.0377216	0.132245	-0.0700221	0.00872087	-0.00254393	0.0391617	-0.0168014	0	-0.0697541	-0.0576677	-0.170963	0.442443	0.104766	0.992471	0.00242845	0.68312	0.086271	0.814004	0.0575359	0.514788	0.164451	10411502	1700024P04Rik
-0.0802956	-0.0103364	-0.0106692	-0.0849242	-0.0377045	-0.0447612	0.0950713	0.0369473	-0.0298166	0.0389667	-0.0199499	-0.0127668	0.0415611	-0.0217495	0.00911379	-0.000483	-0.010057	-0.0270371	-0.0199137	-0.0280657	0.0113954	0.0642557	-0.0681415	0.0305777	0.274465	-0.0628572	0.502608	-0.0544236	0.731013	-0.0322561	0.744896	-0.0325872	0.666462	-0.0536791	10506470	1700024P16Rik
0.000984	0	-0.029377	-0.0106611	-0.0542326	-0.0416241	0.0339313	0.0608902	0.0811615	0.0119615	0.0375109	0.0649915	0.038662	-0.0103307	0.043808	-0.0311666	-0.0149756	0.0204749	-0.00914335	-0.0619268	-0.0405421	-0.0344911	-0.0235696	-0.0471177	0.0393385	-0.0708929	0.324323	-0.0465315	0.81622	-0.0139294	0.821145	0.014719	0.907635	0.0125743	10466147	1700025F22Rik
-0.12383	-0.573614	0.158155	-0.322934	-0.768093	0.0459206	-0.0346045	0.23993	-0.935611	-0.0811145	0.058466	-0.924485	-0.0323479	0.28653	-0.00658369	-0.970149	-1.57382	-0.897291	-1.17983	-1.25945	-1.0737	1.06016	1.24603	1.43992	0.73309	0.0155038	0.549263	-0.346599	0.16729	0.88302	0.224234	0.906926	0.000417491	-1.51277	10358713;10358717	1700025G04Rik
-0.129225	-0.405611	-0.153959	-0.285079	-0.532312	-0.374797	-0.0991111	0.108115	0.128	-0.357113	0.0585918	-0.111836	0.332337	-0.0150452	0.405195	0.0505285	0.0091548	-0.0284958	0.150747	-0.0980377	-0.169614	-0.302878	-0.209508	-0.295014	0.0123847	-0.267939	0.000126819	-0.554326	0.0249949	-0.323893	0.062704	-0.274529	0.890864	-0.0443639	10434930	1700025H01Rik
-0.0631494	0.010047	-0.05931	-0.0338345	-0.0342107	-0.0741534	-0.0226173	0.0370269	0.0829325	-0.0635572	0.0389805	0.0675797	-0.0571566	-0.0814199	0.0226645	0	0.0332737	-0.0175786	-0.00776625	-0.0648675	-0.00448418	-0.0298581	-0.0876985	0.0480185	0.480051	-0.065826	0.98233	-0.00379785	0.747919	-0.0476669	0.927343	-0.0167292	0.953101	-0.0192558	10511814	1700025O08Rik
0.841437	1.084	0.443561	0.454118	0.685311	0.022109	0.580022	-0.18379	0.42897	0.241178	-0.367501	0.0472364	-0.168895	0.238211	1.02815	0.10549	0.0767932	0.623592	0	-0.0776267	-0.168107	-0.18289	-0.512785	-0.416869	0.173337	0.464069	0.66347	0.2226	0.542403	0.319797	0.167957	0.670333	0.0484489	0.95927	10430433	1700027A07Rik
-0.0169239	-0.0178022	-0.0794592	-0.0926785	-0.151544	-0.0583654	0.0529189	0.120628	0.158622	0.0158939	-0.000838	0.0428567	-0.135838	0.024683	-0.0211587	-0.03263	-0.00904083	0.0127802	0.0505552	-0.0266657	0.0380125	-0.338375	-0.0785251	-0.0686293	0.0628681	-0.134476	0.829515	-0.0253576	0.599692	-0.059832	0.423492	-0.0900962	0.507893	0.0923808	10365282	1700028I16Rik
0.0169478	-0.248003	-0.00996161	0.137314	0.00986147	-0.0513296	-0.0255284	0.0202527	0.0226193	0.0369067	0.074523	0.208495	-0.18902	-0.24483	-0.100303	0.0803485	0	0.245142	-0.131518	-0.112563	0.0790687	0.270514	0	-0.135484	0.526803	-0.0804065	0.352268	0.153856	0.463865	-0.132692	0.898338	0.0308088	0.829473	-0.069205	10562736	1700028J19Rik
0.264289	0.242755	0.245065	-0.0111041	0.0459251	0.0311947	0.599163	0.51187	0.703937	0.219825	0.113622	0.34028	0.0671158	-0.101666	0.0216389	-0.24523	-0.238938	0.000715	-0.118811	-0.0368924	0	-0.19841	-0.136555	-0.19835	0.029314	-0.278429	0.434788	0.140658	0.091512	0.297505	0.328752	0.188255	0.0991479	0.314126	10391870	1700028N14Rik;Map3k14
0	0.0491195	-0.145152	0.00144672	-0.0429454	-0.128562	-0.0861192	0.101139	-0.00938845	-0.0739656	0.0501742	-0.048986	-0.0306253	0.0388408	0.0221329	-0.0936785	-0.0219369	0.00917482	-0.00565195	-0.0782957	-0.0376096	-0.142107	-0.0652924	-0.275302	0.788141	-0.0331579	0.751841	-0.054465	0.965679	-0.00886869	0.987467	-0.00382979	0.612689	0.116552	10466728	1700028P14Rik
-0.226055	0.0734324	-0.141726	-0.200133	-0.0139003	-0.19903	0.0500045	0.0106783	0.310784	0.0654426	0.0139008	0.134789	0.000319	-0.0902309	0.0106783	-0.19076	-0.00792694	-0.0810971	-0.166363	-0.111806	-0.023468	-0.277315	-0.255274	-0.0466795	0.0126439	-0.215502	0.452246	-0.0914907	0.871296	-0.0246407	0.92111	-0.0173564	0.702506	0.0751877	10411353	1700029F12Rik
-0.315083	-0.130044	-0.101597	-0.329439	-0.257008	-0.154482	0.210221	0.264952	0.366809	0.0288529	0.177371	0.178824	0.145217	-0.10283	0	-0.0206733	-0.049056	0.24029	-0.041965	0.0210071	-0.159361	-0.227535	-0.347314	-0.144442	4.04e-06	-0.419114	0.0337024	-0.228738	0.0146333	-0.271462	0.192524	-0.154502	0.925971	0.0251549	10577179	1700029H14Rik
-0.240442	-0.343802	-0.395651	0.038846	-0.247734	-0.377191	-0.203165	0.1211	0.233293	-0.0366859	0.261087	0.249903	0.0615845	0.543796	-0.210942	0.154695	-0.0327416	-0.0585046	-0.0327416	-0.0758338	-0.0593095	-0.201165	-0.268839	-0.366822	0.0102572	-0.365251	0.0340064	-0.392475	0.153454	-0.282145	0.336374	-0.205034	0.974897	0.0179464	10474041	1700029I15Rik
-0.319794	-0.528794	-0.512671	-0.0418892	-0.00232935	-0.0675297	-0.629157	-0.557735	-0.566793	-0.135094	-0.0484362	-0.00665093	-0.310483	-0.622092	-0.430134	0.54165	0.832766	0.0521817	0.554163	1.06051	0.515	0.922128	0.607776	1.09573	0.783459	0.0784766	0.577724	0.208735	0.0379329	-0.721034	0.0055533	-0.955392	0.00123398	-1.12071	10578504	1700029J07Rik
0.0875106	-0.191102	-0.0658898	0.0238128	-0.197456	-0.162321	0.0630908	0.0509601	0.198571	-0.133414	0.0403771	0.0868058	0.174839	-0.0106235	-0.0591817	-0.0533881	-0.099946	0.0727301	0.0220132	-0.125618	0	0.0176182	-0.0407772	-0.387251	0.217888	-0.135306	0.437364	-0.119252	0.753124	-0.0573728	0.805681	-0.0497059	0.867285	0.0525626	10509049	1700029M20Rik
-0.223335	-0.295277	-0.177766	-0.145942	-0.128663	-0.201521	-0.0606914	0.00666046	0.130661	-0.0013957	-0.00865316	0.0539155	-0.0215116	0.0142078	-0.104237	0.0364709	0	0.0131993	0.0538974	-0.139998	-0.0121121	-0.287497	-0.117972	-0.180599	0.0428736	-0.2155	0.273629	-0.158237	0.155439	-0.211974	0.30763	-0.16268	0.999924	-6.15e-05	10425630	1700029P11Rik
-0.101055	-0.275971	-0.254604	-0.178976	-0.333549	-0.35816	-0.183312	0	0.125181	-0.0988026	0.042347	0.014183	-0.00616121	-0.0848208	0.196297	-0.0947433	0.103515	0.250059	-0.035481	0.117464	0.0470405	-0.534503	-0.249777	-0.327237	0.0179396	-0.233652	0.0269082	-0.285491	0.0113647	-0.336663	0.0290312	-0.293394	0.533633	0.12012	10399579	1700030C10Rik
0.23957	0	0.0935874	0.156054	0.018991	0.00333452	-0.115783	0.0990291	1.60191	-0.131184	-0.0121417	1.47714	-0.116174	-0.0565715	-0.0766144	-0.0205378	-0.0285869	0.0445642	0.0152845	-0.119061	-0.0509863	-0.152358	-0.0699649	-0.13805	0.224319	-0.401238	0.740627	0.168376	0.881921	0.0867762	0.824971	0.136844	0.808765	0.20538	10374704	1700030C12Rik
0.0744052	-0.146604	-0.0188336	0.0303607	-0.120783	-0.0789266	0.112756	0.049068	0.0126862	-0.00187969	0.0262837	-0.00184965	-0.0721426	0.0254498	-0.0248613	-0.0655856	0.0113082	-0.0448623	-0.149916	-0.0875893	0.109766	-0.0927491	-0.188375	0.0198755	0.728036	-0.0762409	0.95608	-0.0195455	0.978535	-0.0103503	0.998672	-0.000817058	0.952124	0.043686	10432560	1700030F18Rik
0	0.028945	-0.0197477	-0.0446138	0.155158	0.0734343	-0.149832	-0.0680237	-0.0671177	-0.105247	0.0285463	-0.059988	0.187846	-0.222747	0	0	-0.136362	0.0375709	0.144452	0	-0.0537381	-0.171392	-0.182464	-0.229608	0.209878	0.102473	0.726727	0.0438297	0.611277	0.0651263	0.990923	0.00195797	0.0514788	0.226684	10582014	1700030J22Rik
-0.0837483	0	0	-0.000519	0.000518	-0.0539775	0.0574527	0.066042	0	0.0322332	0.0147948	0.0241437	0.460432	-0.153142	0.0312905	-0.022749	0.177844	0.176344	0.0628772	0.0350962	-0.083282	-0.0694704	0	0.0296011	0.625295	-0.0553989	0.346433	-0.135815	0.388622	-0.133434	0.894975	-0.0278516	0.981419	-0.0096647	10572804	1700030K09Rik
-0.0265164	-0.392846	-0.211116	-0.0846333	-0.714869	-0.291903	0.134973	0.282867	0.0961599	-0.0336957	0.177703	0.00892496	0.0394249	-0.163028	0.0426731	-0.0964761	0.161821	0.0836749	0.11007	-0.038023	0.19494	-0.38664	-0.334679	-0.466377	0.00241075	-0.398136	0.126221	-0.260004	0.0551171	-0.336654	0.0320423	-0.375976	0.71365	0.108918	10416266	1700031C06Rik
-0.133357	0.653698	0.251463	-0.356552	0.117203	-0.0174208	-0.199509	0.258716	0.748118	-0.290534	0.0719333	0.297372	-0.0161696	-0.561806	0.0610275	-0.146284	-0.0792923	0.146715	-0.271208	0.0829887	0.0181208	0.0872717	-0.0197248	-0.109744	0.783798	-0.0618437	0.352153	0.258155	0.738307	0.112126	0.678644	0.142539	0.861456	0.0999048	10606146	1700031F05Rik
-0.184247	-0.331483	-0.00645876	-0.104261	-0.293191	-0.0575209	0.152054	0.389334	0.414562	0.0322719	0.284678	0.229678	0.0065093	0.0315518	-0.0406518	-0.0214944	0.0315518	0.138634	-0.172769	-0.0585733	-0.0796318	-0.253863	-0.315913	-0.126067	9.15e-05	-0.41329	0.225522	-0.161997	0.124069	-0.212424	0.734848	-0.059202	0.779561	0.0690873	10546098	1700031F10Rik
-0.113179	-0.127251	-0.0419769	-0.0960589	-0.0971942	-0.090446	-0.0359778	0.354625	0.0525546	-0.0200753	0.185163	0.111749	-0.10969	-0.0583987	-0.0362177	0.117419	0.0353279	0.0544415	0.265746	0	0.0592485	-0.20493	-0.0236483	-0.163584	0.00447983	-0.202357	0.816202	-0.0262489	0.0911281	-0.163414	0.0347093	-0.202683	0.853348	0.0363697	10426584	1700031M16Rik
-0.0146937	-0.0206938	-0.112616	-0.0377541	-0.0672278	-0.144207	0.0523295	0.0278287	0.0207796	0.013092	-0.00808001	-0.0349603	0.06215	-0.0450234	0.0974288	-0.0280662	-0.00646448	-0.00862312	-0.0541935	0	-0.0665245	-0.0800867	-0.168675	-0.15777	0.197122	-0.0780303	0.194324	-0.104384	0.582726	-0.0518142	0.818586	-0.0259594	0.56517	0.0693119	10455714	1700034E13Rik
-0.0679984	-0.11699	-0.237894	-0.194714	-0.114372	-0.403379	0.268703	-0.0166569	0.268068	0.197936	-0.112243	0.242521	0.28426	0	0.033504	0.0132632	0	0.0445819	-0.0892811	0.057508	-0.100056	-0.394223	-0.276866	-0.27636	0.00346764	-0.330613	0.0428248	-0.295146	0.18257	-0.208506	0.395792	-0.145282	0.572181	0.126592	10361135	1700034H15Rik
-0.642447	-0.806055	-0.378863	-0.0588689	0.00339365	-0.157358	-0.589036	-0.255055	-0.368624	-0.295024	-0.0195985	-0.231622	0.298472	0.641357	-0.371139	0.0579319	0	0.242074	0.442771	0.0378594	-0.340438	-0.201426	-0.0355372	0.597434	0.884781	-0.0468733	0.151982	-0.529596	0.270635	-0.440035	0.359885	-0.386764	0.336479	-0.46019	10497960	1700034I23Rik
-0.0400567	0.00685072	-0.148922	-0.165112	-0.00309229	-0.203941	0	0.152393	0.0216913	-0.0960655	0.0534534	0.0187349	0.0546637	0.144184	0	-0.0939693	-0.104094	-0.125793	0.0823488	0.0977421	0.18508	-0.0357895	-0.256669	-0.0422039	0.17382	-0.117414	0.166489	-0.158661	0.920614	0.0155732	0.0731273	-0.214103	0.951505	0.0191754	10399389	1700034J04Rik
-0.913121	-1.09119	-0.97274	-0.100268	-0.0263753	0.0736279	-0.923349	-1.04673	-0.720952	-0.0566955	-0.0947475	0.104027	-0.901128	-0.322165	-0.395191	1.92019	0.537848	0.217341	0	-0.444762	-0.494349	0.847024	0.557398	0.865359	0.89515	-0.0486039	0.951073	0.0344828	0.00104532	-1.39681	0.728125	-0.191975	0.00333754	-1.26161	10549377	1700034J05Rik
-0.104017	-0.244625	-0.251804	-0.0751658	-0.260161	-0.172193	0.335256	-0.106164	0.268503	0.296779	-0.0943136	0.133568	0.180944	0.139708	0.00110149	0.0251184	-0.0940723	0.130505	0.030055	-0.220075	-0.131319	-0.0400238	-0.230971	-0.121846	0.141879	-0.323599	0.333461	-0.291912	0.547482	-0.205178	0.856196	-0.077548	0.944222	-0.053714	10537676	1700034O15Rik
-0.0847302	-0.296356	-0.260379	-0.0568638	-0.229759	-0.213284	-0.0564146	0.116533	-0.046453	-0.00746822	0.124366	0.00746822	-0.0842047	-0.0216608	0.0082221	-0.108817	0	0.115958	0.281662	0.126401	0.089839	-0.23652	-0.157845	-0.353864	0.0153811	-0.213234	0.178017	-0.157681	0.112752	-0.192609	0.00258795	-0.356196	0.788401	0.059181	10586015	1700036A12Rik
-0.0523372	-0.0315771	-0.10156	-0.0853744	-0.106147	-0.149478	-0.0994797	0.1077	0.149878	0.0231233	0.0678091	0.15079	-0.00778437	-0.178548	0	0.0705147	0.0353966	0.0900588	0	0	-0.0762057	-0.376706	0	-0.304992	0.0838885	-0.154382	0.863516	-0.0256347	0.228439	-0.153069	0.684229	-0.0623437	0.377636	0.139487	10437263	1700037C18Rik
-0.628206	-0.816033	-0.826524	-0.248518	-0.426548	-0.300759	-0.00639153	0.00571728	-0.115943	0.484225	0.18133	0.315525	-0.140191	-0.0908709	0	-0.325622	0.0354891	0.624046	-0.164586	0.147099	-0.109242	-0.433562	-0.421215	-0.187863	0.00563967	-0.685175	0.153825	-0.464078	0.0506328	-0.652403	0.152429	-0.498856	0.739629	-0.193551	10487847	1700037H04Rik
-0.0351691	-0.00813675	-0.0975428	-0.164543	-0.0513754	-0.169043	-0.0488777	0	0.237762	-0.0784206	-0.00798988	0.0133147	0.320987	-0.0537624	0.0638604	0.000375	0.10909	0.142773	-0.0883894	-0.00573301	-0.294189	-0.105684	-0.0825496	-0.0555182	0.305685	-0.106933	0.145	-0.197997	0.238116	-0.171714	0.829039	0.0418023	0.987521	-0.00638445	10447082	1700038P13Rik
-0.0769763	-0.311827	-0.142262	-0.142449	-0.346267	-0.170185	0.0232806	0.0639014	0.0880356	-0.0085907	0.00874758	0.0936022	0.0532641	-0.169002	0.0658627	0.0232806	0	0.272194	-0.033731	-0.0312648	0.0222449	-0.208201	-0.0353637	-0.0721846	0.00964888	-0.243157	0.142561	-0.181703	0.0187849	-0.296819	0.168145	-0.184078	0.642128	-0.0930779	10552907	1700039E15Rik
0.0161724	-0.0242782	-0.0119019	-0.00677824	-0.0527363	-0.0317044	0.076942	0.058187	-0.0713401	0.0227246	0.0602226	-0.0977602	0.0253148	0.0406957	0.0888467	0.0116181	0	0.134431	-0.0130487	-0.0734768	-0.0121155	-0.112608	-0.0712676	-0.141251	0.724964	-0.0267004	0.473299	-0.0701568	0.524853	-0.0672208	0.918034	0.0143425	0.491866	0.0898379	10428687	1700040F17Rik
-0.0972562	-0.16283	-0.0856781	-0.191439	-0.107821	-0.0518723	0.345602	0.0305471	0.177894	0.118851	-0.103498	0.0417132	0	0.0354519	0.0229735	0.186154	-0.139716	-0.0569053	-0.180471	0.0547895	-0.0598111	0.932982	0.205764	-0.0393281	0.106255	-0.218001	0.482119	-0.135624	0.595688	-0.11266	0.832439	-0.0543183	0.00949487	-0.482622	10369806	1700040L02Rik
-0.199953	-0.396024	-0.255873	-0.0285282	-0.399164	-0.334188	-0.152801	-0.0922069	0.0343065	-0.197295	-0.0938411	0.0194874	0	0.000942	0.0112657	-0.00887108	0.120808	0.0593953	-0.0552478	0.0709729	-0.00887108	-0.26652	-0.266641	-0.270083	0.0114987	-0.188563	0.00526503	-0.273024	0.00112966	-0.326066	0.00674946	-0.27124	0.997027	-0.00120727	10425109	1700041B01Rik
-0.126751	-0.232577	0.0351958	-0.00591087	-0.0682683	0.055675	-0.281169	0.268356	0.0549908	-0.199403	0.344908	0.187331	-0.0622268	-0.130099	-0.0843544	0.271021	0.332703	0.580904	0.277983	0.147351	0.140141	-0.110433	0	0.21351	0.391693	-0.119608	0.877258	0.0351207	0.0130857	-0.451982	0.209283	-0.245598	0.786862	-0.0914651	10570870	1700041G16Rik
-0.0317674	-0.188761	-0.299039	-0.140848	-0.463489	-0.357024	-0.168755	0.11642	0.00534582	-0.203985	0.000216	0.0551643	0.0772147	-0.199846	0.0429444	-0.00327492	-0.100396	-0.157335	0	-0.0140476	0.0133462	-0.152417	-0.201753	-0.215225	0.0242089	-0.214222	0.0782727	-0.220259	0.23734	-0.159819	0.0603012	-0.246587	0.819749	-0.057023	10504199	1700045I11Rik
0.146363	-0.560522	-0.436698	-0.0951967	-0.916482	-0.792239	0.376736	-0.842909	0.0974359	0.0453434	-1.22545	-0.0316496	0.461125	0.435957	1.06339	-2.67	-2.17709	-2.47732	3.16041	3.07762	2.83282	-0.953516	-0.722121	-0.436669	0.615772	-0.179048	0.011602	-1.09595	1.38e-05	1.99901	1.08e-10	-3.46608	0.739767	0.26164	10574415	1700047G07Rik
-0.410093	-0.531137	-0.496059	0.00186157	-0.18298	-0.169585	-0.129535	-1.50304	-0.166463	0.266995	-1.22963	0.194107	-0.61729	0.117012	-0.216462	0.163874	0.349603	0.142746	-0.251038	-0.110034	0.529176	-0.279281	-0.132386	0.001894	0.726048	0.13025	0.919568	-0.059539	0.288096	-0.51628	0.510489	-0.354132	0.868588	-0.161231	10395770;10395780;10395805	1700047I17Rik2;Fam177a
-0.581324	-0.326417	-0.333205	-0.197058	-0.0245109	-0.10007	0.280714	0.0952482	-0.230364	0.421778	0.210519	0.0404553	0.43562	-0.190053	-0.19321	0.0987825	0.613058	0.283298	0.157315	0.21665	0.28156	0.0292521	-0.210324	0	0.00959341	-0.396823	0.170731	-0.277883	0.00385741	-0.592144	0.0204233	-0.478939	0.48883	-0.200074	10590433	1700048O20Rik
-0.0665755	-0.103854	-0.051239	-0.0213442	-0.112364	-0.0221777	-0.0657353	0.178849	0.0668821	-0.00066	0.204787	-0.00759983	0	-0.065587	0.180368	-0.0270109	0	0.0245595	0.24113	-0.113732	0.156969	-0.14278	-0.0809841	-0.234611	0.1706	-0.12568	0.431052	-0.101186	0.673341	-0.0621086	0.23786	-0.157715	0.649394	0.0898659	10449289	1700049J03Rik
-0.135149	-0.207998	-0.0384226	-0.331676	-0.331396	-0.0952239	-0.110776	0.0919237	0	-0.123699	0.05125	-0.0706201	0.304488	0.0368018	0.284086	-0.0673151	-0.120203	-0.0922751	-0.0076561	0.00726986	-0.172537	-0.33535	-0.148319	-0.347658	0.0588958	-0.162991	0.000574191	-0.398436	0.458007	-0.0967131	0.305917	-0.132336	0.637455	0.0871318	10369894	1700049L16Rik
-0.0107727	-0.11958	-0.0262804	-0.0258713	-0.371121	-0.173318	-0.0593019	0.249287	0.422376	-0.0998273	0.250807	0.233744	0.101076	0.127614	-0.0351973	0	0.183339	0.105646	-0.0639	-0.00435257	0.00630093	-0.315564	-0.105431	-0.0931582	0.00609312	-0.287338	0.179552	-0.185655	0.131357	-0.217486	0.550521	-0.100507	0.866442	0.0502271	10392035	1700052K11Rik
0.0126591	0.0546646	0.326588	-0.047081	0.150936	0.214251	-0.191808	-0.259779	0.0553341	0.00140285	-0.325278	0.0391502	-0.117092	0.646749	-0.142562	-0.234548	-0.30603	-0.634688	0.0605736	0.149387	0.0751581	-0.2309	-0.137956	0.0143337	0.161933	0.232166	0.973483	-0.0103623	0.02285	0.510425	0.946894	0.0236298	0.435136	0.236843	10418169	1700054O19Rik
0.229219	0.100381	0.280932	0.213909	0.176648	0.369137	0.330989	-0.146173	-0.0866566	0.364199	-0.0662022	0.00283337	0.0414872	-0.206859	-0.227419	0	-0.0474815	-0.36909	0.181267	0.290149	-0.393948	0.0493407	0	0.184802	0.22869	0.161873	0.0395515	0.359301	0.042796	0.367228	0.30959	0.202548	0.577699	0.150324	10504514	1700055D18Rik
0.119817	-0.170179	-0.184644	0.00874853	-0.183077	-0.254631	0	0.0370803	-0.0859795	-0.0220561	0.0454145	-0.110596	-0.169662	0.0424805	0	-0.131902	-0.18519	0.0158911	-0.123353	-0.0863447	-0.0263634	0.0570083	-0.12734	-0.0615463	0.499837	-0.0879714	0.72074	-0.0682671	0.965198	-0.0102608	0.897825	-0.0319741	0.843813	-0.0667017	10587810	1700057G04Rik
-4.26151	-4.41408	-4.50068	-0.76987	-0.985547	-1.09671	-4.18107	-4.48422	-4.42852	-0.972938	-0.887075	-0.980448	-4.6815	-0.230437	-1.70572	0.0609427	0.264489	0.136203	0.670365	1.01109	0.721628	0.917258	1.09895	1.04767	0.988409	-0.0156865	0.734089	-0.465513	0.0180789	-2.82528	0.00352448	-3.47243	0.00209788	-3.69269	10589695	1700061E17Rik
-0.166588	0.0104265	-0.121539	-0.0801601	-0.0892162	-0.148608	0.0526023	0.273781	0.237118	0.0176687	0.219312	0.0673194	-0.0685926	0.000566	0	-0.143142	-0.0679483	0.148037	0	-0.0455227	-0.0200763	-0.239386	-0.180994	-0.136574	0.00087568	-0.243914	0.444463	-0.0766052	0.464589	-0.078263	0.492564	-0.0774144	0.534538	0.0863705	10446190	1700061G19Rik
-0.0453658	-0.00696516	-0.0761404	-0.0975213	-0.0849976	-0.0979748	0.0927644	-0.0356803	0.0494165	-0.0130119	0.00142479	0.00934696	-0.00762176	-0.0027833	0	0.0296388	0.0482964	-0.0202446	0.0235262	0.0554247	-0.0135865	-0.0928073	-0.0490704	-0.0167236	0.364048	-0.0855376	0.634381	-0.0646925	0.535503	-0.0873911	0.544021	-0.089949	0.964502	-0.0152938	10501744	1700061I17Rik
-0.113656	-0.0346627	-0.278436	-0.154705	-0.106502	-0.286228	0.160452	0.446054	0.0226202	0.0670376	0.374841	0.0562167	0.0402575	0.217112	0.593624	-0.00437737	-0.16331	-0.0975141	-0.0889282	-0.130861	-0.103845	-0.198638	0	-0.152272	0.00301111	-0.350235	0.0036024	-0.446029	0.694493	-0.0739644	0.798708	-0.0544871	0.898908	-0.0453952	10541491	1700063H04Rik
0.71768	1.35346	0.652481	0.691772	1.18757	0.48599	0.702153	-0.236558	0.980075	0.394888	-0.212792	0.935023	-0.279431	-0.256953	-1.28968	0.141391	-0.655935	-0.330947	-0.220803	-0.256482	0.100251	-0.431694	-0.191991	-0.215282	0.120985	0.421027	8.16e-05	1.45685	0.00201944	1.12999	0.00787346	0.973836	0.00225018	1.12781	10377547	1700064E03Rik
0.0886002	0.0551915	-0.0178943	-0.0373697	-0.0483437	-0.201367	0.238877	0.304064	0	0.130244	0.118726	-0.0853224	0.0787187	0.0112214	0.057435	0.0129738	0.088603	-0.158156	-0.00587893	-0.0766277	-0.0200448	-0.207501	-0.107862	-0.120664	0.0470755	-0.144629	0.46358	-0.0759888	0.953585	-0.00800395	0.964288	0.00732001	0.349947	0.118479	10595787	1700065D16Rik
-0.163562	-0.315025	-0.139792	-0.242276	-0.462724	-0.266027	-0.122007	0.0742764	0.0627441	-0.272093	-0.10256	-0.00363684	-0.0624147	0.100297	0.196114	-0.107565	0.228706	-0.0430865	0.076139	0	0.0711508	-0.455374	-0.0837245	-0.309802	0.0345827	-0.204355	0.00712676	-0.3429	0.0268404	-0.290919	0.016895	-0.313998	0.960203	0.018066	10454836	1700066B19Rik
-0.0779281	0.0306177	-0.0583692	-0.836316	-0.625488	-0.381843	-0.0621724	0	0.135449	-0.374731	-0.396623	-0.266018	0.0974488	0.101469	0.194292	0.144038	0.119453	-0.211151	0.0366964	-0.156277	-0.0103207	-0.64079	-0.390592	-0.294914	0.257148	-0.164205	0.0150228	-0.455957	0.081391	-0.342334	0.169075	-0.281587	0.726129	0.117211	10346337	1700066M21Rik
0.413249	0.181842	0.168861	0.232532	0.111752	0.0215888	-0.107495	0.18149	0.0719051	-0.0979929	0.0746279	0.05233	-0.0119638	0	0.0256558	0.0274243	-0.107596	-0.0693717	-0.213057	-0.221745	0.107728	-0.268965	-0.118681	-0.210177	0.0957199	0.15916	0.148552	0.18374	0.0692304	0.238152	0.0222502	0.297329	0.00291994	0.387579	10573281	1700067K01Rik
-0.0876885	-0.158935	-0.0886178	-0.0625343	-0.170953	-0.123245	0.0017395	0.146047	0.083262	0.0477424	0.0704207	0.0235205	0	-0.00415516	0.0298386	-0.0920954	0.0386677	-0.044642	-0.0309844	-0.0988035	-0.0687919	-0.275691	-0.112622	-0.227533	0.00223565	-0.177451	0.0979322	-0.12389	0.316913	-0.0826391	0.601748	-0.0491357	0.36633	0.0899533	10445743	1700067P10Rik
0.023416	0	-0.218204	-0.0690708	-0.0263124	-0.26026	0.0452671	0.24335	-0.019824	-0.017077	0.146936	0.0321879	-0.0873728	0.167879	0.0279017	-0.0934668	0.0153012	0.0237937	-0.173279	0.00493622	-0.078753	-0.26169	-0.0199604	-0.208709	0.0576436	-0.163545	0.274653	-0.127874	0.586911	-0.0736147	0.960561	-0.00937342	0.721377	0.0717146	10557109	1700069B07Rik
-0.159268	-0.102036	-0.116139	-0.0640197	-0.180801	-0.193928	-0.0331211	0.0146398	0.0712047	-0.0922131	-0.00603247	0.152255	0	-0.0394859	-0.0122709	-0.0133171	0.271696	0.0716653	-0.095716	-0.0226812	-0.0231318	-0.246184	0.0122919	-0.0573997	0.057516	-0.153821	0.280989	-0.11878	0.0252906	-0.246047	0.490805	-0.0888556	0.868241	-0.0389347	10532716	1700069L16Rik
0.185604	0	0.0460343	-0.0418782	-0.41347	-0.503429	0.24238	0.196157	-0.0641136	-0.25562	-0.183477	-0.427855	0.319625	0.166388	0.336042	-0.133917	-0.0976896	0.0451412	-0.0238314	0.00756407	-0.399436	0.143738	-0.0398889	-0.0777864	0.822526	-0.0391017	0.0498777	-0.395209	0.826302	-0.0590347	0.959153	0.0173779	0.714492	-0.129878	10389062	1700071K01Rik
-0.34071	-0.512577	-0.362885	-0.500735	-0.546945	-0.21136	0.050818	-0.019454	0	0.0515442	0.0280361	-0.0115485	-0.122228	0.0504346	-0.129376	0.319765	-0.129516	0.447894	0.0131283	-0.194811	-0.00365972	-0.104409	-0.120079	-0.0277877	0.000669092	-0.429101	0.030067	-0.345479	0.000161228	-0.62525	0.0350147	-0.350755	0.0619739	-0.328444	10375127	1700072H12Rik
0.0291905	-0.185183	-0.0315204	0.0736189	-0.0503411	0.0106144	-0.0452566	0.0894127	-0.132315	0.0578489	0.111383	-0.058908	0.126293	0.012548	0.116558	0.583162	0.369132	-0.014276	0.19203	0.107804	0.233399	-0.259914	-0.0618691	-0.19048	0.829769	-0.0292978	0.52281	-0.110737	0.0384538	-0.338276	0.24863	-0.203348	0.538589	0.145151	10542724	1700073E17Rik
-0.0854406	-0.0993309	-0.0727654	-0.11127	-0.12822	-0.0896001	-0.0362196	0.0589209	0.0930114	-0.0159383	0.0606451	0.0537562	0.00603104	-0.0225148	0.0254183	-0.0565558	-0.00451183	0.0781179	0.0066309	0.0109281	0.130364	-0.126125	-0.0775557	-0.0691567	0.0238564	-0.133467	0.202911	-0.100749	0.21606	-0.103455	0.073119	-0.147079	0.977504	-0.00682528	10544307	1700074P13Rik
-0.1302	-0.26719	-0.0418773	-0.0543246	-0.208727	0.182464	0.291505	0.0660968	0.00458098	0.327118	0.125742	0.0193415	-0.00467062	-0.137328	-0.169154	-0.092103	0.0105734	0.00458098	-0.098546	-0.0173359	0.055882	-0.208631	-0.285966	-0.160984	0.0222803	-0.225707	0.920382	0.017075	0.705642	-0.060993	0.695441	-0.0666425	0.478893	0.131885	10596322	1700080E11Rik
0.232205	-0.213418	-0.251923	0.0737123	-0.301432	-0.30601	0.0604882	0.182926	-0.0322895	-0.128902	-0.00243282	-0.172751	0.0417709	0.103787	0.107739	-0.010428	-0.0326233	0.0545769	-0.14442	-0.0651708	0.131751	-0.201869	-0.260409	-0.197272	0.276926	-0.112317	0.114191	-0.212243	0.378196	-0.131653	0.534981	-0.101864	0.687749	0.092039	10543676	1700080G18Rik
-0.188387	-0.154003	-0.125665	-0.181228	-0.117955	-0.157151	0.0122604	0.12002	0.079545	-0.0062418	0.0239253	0.0152412	0.0540276	0.057529	-0.0510297	-0.0765295	0.0825739	0	-0.109427	0	0.020298	-0.0676436	-0.116383	-0.150615	0.00723258	-0.194857	0.0650509	-0.17424	0.117418	-0.15608	0.236952	-0.124355	0.823429	-0.0425177	10604557	1700080O16Rik
0.0216718	0.0590615	-0.103062	-0.0694952	-0.0380025	-0.1504	0.741771	0.000248	0.197003	0.626557	-0.0699816	0.170507	0.373307	-0.523711	0.373055	-0.0181761	-0.0147629	-0.0763269	-0.108113	0.0662007	-0.155088	-0.220516	0.190588	0.0448503	0.186698	-0.324388	0.751735	-0.120922	0.983074	-0.0102824	0.972089	0.0189626	0.954496	-0.0516786	10583548	1700084C06Rik
-0.111422	-0.336606	-0.13621	-0.263236	-0.579085	-0.449018	0.136287	0.0564246	0.185858	-0.017097	0.00245285	0.0718989	0.021409	0.028409	0.0098691	0.178718	0.0513596	0.186362	0.0632634	-0.0855875	0	-0.294228	-0.203314	-0.246287	5.4e-05	-0.385233	0.00472594	-0.332492	0.000197114	-0.451409	0.0113446	-0.305155	0.766757	-0.0646532	10481451	1700084E18Rik
0.893834	0.685195	0.780937	0.640199	0.362548	0.518465	-0.0691976	-0.103365	0.348218	-0.314877	-0.333002	0.082397	0.0297542	-0.0476422	0.260473	0.366786	-0.10449	-0.179162	0	0.0878563	0.0704756	-0.161899	0.00213099	-0.127563	0.00765947	0.711834	0.105427	0.566001	0.0893526	0.619152	0.111097	0.594086	0.0501118	0.74264	10428066	1700084J12Rik
-0.268084	-0.252049	-0.081779	-0.18151	-0.153938	-0.160059	-0.0997953	0.129197	0	-0.110154	0.00222111	-0.0503254	0.000835	0.161562	-0.0214491	-0.0128217	-0.0330768	0.141802	0.0685954	-0.0953565	0.0932698	-0.110222	-0.149525	-0.0186706	0.0125979	-0.161427	0.00666195	-0.229886	0.0135178	-0.214871	0.0190511	-0.205073	0.449638	-0.0900972	10463345	1700084K02Rik
-0.0980558	-0.4739	-0.199616	-0.0616379	-0.475339	-0.170593	0	-0.309916	-0.0268893	-0.00645113	-0.193676	0.0242662	0.0289068	-0.130363	0.0798531	-0.0467105	0.0290952	0.0215464	0.0366902	-0.146661	-0.00941181	-0.340022	-0.0665913	-0.13728	0.132995	-0.161079	0.0901596	-0.239323	0.0933978	-0.247834	0.178851	-0.206729	0.816337	-0.0652262	10412555	1700084P21Rik
-0.0767164	-0.0833416	0	-0.174928	-0.0904646	-0.138589	0.0279431	0.116362	0	-0.0624971	0.0307188	-0.00894165	-0.157176	0.19746	0.0953841	0	0.0530996	-0.127757	-0.108439	0.0224156	-0.0184531	-0.0982189	-0.171264	-0.148337	0.073882	-0.111271	0.0904221	-0.139229	0.462767	-0.0691206	0.560859	-0.0591811	0.766544	0.0452669	10386992	1700086D15Rik
-0.192473	-0.128175	-0.130179	-0.163825	-0.150356	-0.146212	-0.0132928	0.0775318	-0.0424986	-0.0230966	-0.00270462	-0.0378761	-0.0630398	-0.0219407	-0.00547743	-0.0131106	0.121223	0.223954	0.000477	-0.103144	0.0357313	-0.0511441	-0.0832133	-0.229395	0.0988519	-0.144881	0.310607	-0.121717	0.0276706	-0.262559	0.327926	-0.129558	0.912782	-0.0306191	10396466	1700086L19Rik
0.0392985	-0.210732	-0.140513	-0.211806	-0.399272	-0.509182	0.0994115	0.0533924	0.0438065	-0.120351	-0.146988	-0.17056	0	-0.0626884	0.194124	-0.197065	0.181907	-0.00668049	-0.134773	-0.109303	-0.0265231	-0.311615	-0.408087	-0.418272	0.0617231	-0.198487	0.0428707	-0.282513	0.117104	-0.231422	0.358581	-0.148501	0.486416	0.140623	10458538	1700086O06Rik
-0.388923	-0.40206	-0.263027	-0.187588	-0.310415	-0.261365	-0.285154	-0.303261	-0.375166	-0.212726	-0.226026	-0.235879	-0.0378694	-0.243594	-0.39485	0	0.137133	0.24454	0.118782	0.110916	0.125782	0.467601	0.524031	0.719775	0.767186	-0.0291944	0.552151	-0.076792	0.000359722	-0.429454	0.000456285	-0.420723	6.79e-10	-0.872699	10430447	1700088E04Rik
0.220713	-0.396265	-0.167613	0.00275993	-0.489266	-0.314975	0.347106	0.0870376	0.602328	0.171235	-0.0632973	0.466669	0.0444403	-0.251976	-0.214277	-0.246113	0.00815964	0.132259	-0.0756936	-0.142792	-0.0869126	-0.446291	-0.274566	-0.43415	0.00387577	-0.459287	0.84521	-0.05017	0.516899	-0.155543	0.748307	-0.088975	0.522972	0.194228	10437171	1700093J21Rik
-0.137042	0.0292082	-0.0929346	-0.177187	-0.0430265	-0.10214	-0.114451	0.104511	0	-0.0913491	0.0438995	0.0438285	-0.160595	-0.0514231	0.0144296	-0.0515685	0.0193429	0.016727	0.0741186	0.0177207	0.0153332	-0.0436058	-0.111932	-0.2296	0.40789	-0.0849267	0.898976	-0.0213243	0.59774	-0.0820208	0.423492	-0.122911	0.890747	0.0411922	10384685	1700093K21Rik
-0.108132	-0.366909	0	-0.097177	-0.217219	-0.0105619	-0.0413294	0.184864	0.178628	0.0105619	0.269302	0.108296	0.0203404	0.0908055	0	-0.222272	-0.0290914	0.22392	-0.0218391	0.0138836	0.07446	-0.21198	-0.239106	-0.0994115	0.0275019	-0.25172	0.271165	-0.170382	0.471929	-0.124185	0.372124	-0.155501	0.882341	0.050166	10478926	1700101G07Rik
0.00133467	-0.0620451	-0.119524	-0.0732212	-0.272952	-0.191256	0.13328	0.114986	0.285239	-0.094305	0.0426431	0.0811582	-0.119935	-0.00723505	0.201974	0.0266938	-0.0379152	0.033412	-0.103478	0	-0.0330963	-0.193582	-0.149252	-0.0629897	0.010184	-0.213444	0.189922	-0.144545	0.286268	-0.127007	0.585706	-0.0740858	0.959334	0.0156639	10353792	1700101I19Rik
0	0.617814	-0.300471	0.0483866	0.761526	0.0112152	0.548146	-0.0547304	0.66962	0.930573	0.228069	0.833107	-0.996447	-0.181088	-1.16253	0.260072	-0.356774	-0.684743	-0.453485	0.111405	0.106495	0.260835	0.225866	0.148216	0.250993	-0.336052	0.0106141	0.969767	0.280012	0.450227	0.570869	0.268273	0.98505	-0.0218941	10588927	1700102P08Rik
-0.0641971	0.0882306	-0.125988	-0.148562	-0.0537257	-0.234671	0.509707	-0.0106592	0.208801	0.238916	-0.25254	0.220273	0.373807	-0.04532	0.00464726	-0.0410547	-0.101215	-0.0108557	0.155707	0.0514445	-0.0423842	-0.213042	-0.18499	-0.208799	0.109293	-0.242235	0.333252	-0.200864	0.885937	-0.038777	0.556907	-0.144741	0.758336	0.112458	10578120	1700104B16Rik
-0.1705	0.0690393	-0.225662	0.0242858	0.298572	0.0620189	0.185052	0.264012	0.0198379	0.504335	0.813859	0.622682	-0.259025	-0.541435	-0.683798	-0.166622	-0.129555	-0.428329	0.185813	0.248118	0	0.102438	0.0776358	0.487559	0.0367844	-0.392004	0.0407591	0.504379	0.362296	0.251127	0.673323	-0.135018	0.576229	-0.212919	10519346	1700109H08Rik
0.0457239	0.219367	-0.0420227	0.0519877	0.0871015	-0.0782256	-0.0632219	-0.0680699	0.0790629	-0.0400257	-0.0823484	0.00595379	0.00544977	-0.0227613	-0.0286064	0	-0.0205741	0.112406	-0.0258899	-0.109613	-0.00772047	-0.0732374	0.031085	0.0421538	0.135643	0.0754301	0.370284	0.0626279	0.851393	0.0167112	0.191511	0.095063	0.672476	0.0473214	10537300	1700111E14Rik
0.491202	0.97264	0.550182	0.56147	1.11159	0.605175	0.493478	1.31558	-0.776368	0.511883	1.53257	-0.556299	-0.289322	-0.13719	-0.0668664	-0.34789	-0.272151	-0.546583	-0.347258	-0.332523	-0.140667	0.192119	0.341778	0.104782	0.350792	0.295237	0.0289914	0.879837	0.00777254	1.10425	0.0179208	0.98886	0.346228	0.502484	10413152	1700112E06Rik
0.0270619	0.0414081	0.00272369	-0.0553017	-0.102811	-0.0651369	0.0466819	0.0741668	0.12058	0.0362949	0.0160899	0.0272245	0.0418196	-0.0211282	-0.0477323	-0.0728617	-0.118227	-0.0316315	0.0403357	0.00236034	-0.00292253	-0.0806861	-0.0445437	-0.125835	0.710482	-0.0788491	0.962242	-0.0163291	0.886995	0.0488973	0.921768	-0.0386005	0.927192	0.0583457	10365537	1700113H08Rik
-0.14088	-0.0326333	-0.212041	-0.206227	-0.226059	-0.434464	-0.225425	0.154231	0.196512	-0.498371	-0.0209198	-0.0348053	0.144125	0	-0.006845	-0.0959306	-0.286056	0.0273919	0.0570574	-0.0770931	0.0779319	-0.159784	-0.21888	-0.209355	0.222645	-0.137254	0.0835532	-0.254478	0.606734	-0.0905194	0.151734	-0.228016	0.978207	-0.0127109	10436206	1700116B05Rik
0	-0.149631	0.0726948	-0.222092	-0.325858	-0.0350008	-0.0709472	0.00129461	-0.0162387	-0.210802	-0.108479	-0.211443	-0.0235076	-0.308325	-0.107821	0.0216265	-0.0377359	-0.0538912	-0.0386844	0.0433822	0.0476799	-0.321715	0.026845	-0.0585251	0.954272	-0.00721184	0.829716	0.0365702	0.598437	-0.0866476	0.434933	-0.12744	0.985205	0.00781719	10369735	1700120B22Rik
0.000953	-0.148274	-0.204461	0.00264358	-0.0719719	-0.248806	0.148148	0.121718	-0.141671	-0.052825	0.114602	-0.0899773	-0.0208058	-0.0397806	0.156999	0.0900512	-0.009233	-0.0875454	-0.176469	-0.228483	0	-0.276479	-0.313527	-0.327834	0.382442	-0.128319	0.478202	-0.14379	0.626767	-0.10941	0.938669	0.0233315	0.465014	0.194294	10568278	1700120K04Rik
-0.0616169	0.00332689	-0.160149	-0.0195098	-0.0462103	-0.137325	-0.0608592	-0.0108423	0.0990696	-0.0801735	-0.0251708	0.0409422	-0.0439482	-0.019825	0	0.01474	0.00332689	0.118082	0.0114541	0.00332689	-0.017931	-0.1701	-0.106866	-0.039021	0.397455	-0.064075	0.655373	-0.0489896	0.270733	-0.11563	0.561515	-0.0691973	0.868189	0.0350817	10451637	1700122O11Rik
-0.161248	-0.216646	0.0128174	-0.238904	-0.210068	-0.0809722	-0.0922079	0.179176	0.0264125	-0.187821	0.0273581	-0.0761104	-0.0465078	-0.0796542	0.136091	-0.0678201	0.152525	0.0782695	0.0350637	-0.0249753	0.0772142	-0.156648	-0.217605	0	0.206601	-0.128638	0.265483	-0.15248	0.150038	-0.203495	0.227358	-0.178271	0.944884	-0.0244191	10535027	1700123K08Rik
-0.230268	0.022152	-0.241484	-0.264995	-0.168652	-0.263708	-0.143737	0.0978236	0.236086	-0.182731	0.0691981	0.0933499	0.0654421	-0.090044	-0.00348806	0.0569387	0.00802374	0	-0.0097456	-0.000765	-0.00776291	-0.192532	-0.20399	-0.164674	0.0157801	-0.219491	0.130002	-0.181796	0.0881832	-0.212813	0.151832	-0.185068	0.990828	-0.00409341	10546551	1700123L14Rik
0.0805941	0.00731945	0	0.0794716	0.00741672	-0.000361	0.0656547	0.0284233	0.515307	0.106518	0.0571957	0.521176	-0.631332	-0.834337	-0.694693	0.126157	-0.0871668	-0.205476	0.0107136	0.132159	0.161306	-0.00591469	-0.0588341	0.104999	0.282997	-0.186639	0.00100437	0.749194	0.769547	0.0845687	0.822723	-0.0723196	0.981419	0.0156569	10415095	1700123O20Rik
0.0370316	-0.078927	-0.0820765	-0.0679097	-0.0844474	-0.121172	-0.0245218	0.372792	0.115255	-0.11452	0.28749	0.0056529	0.0448031	-0.038589	0.000293	-0.0502114	0.000787	0.0535851	0.019032	-0.00469589	0.10044	-0.224262	-0.113649	-0.13839	0.0281505	-0.173275	0.551393	-0.0684193	0.585126	-0.0676371	0.388533	-0.104509	0.555335	0.0925167	10379880	1700125H20Rik
-0.0919299	-0.139162	-0.0144396	-0.093369	-0.116806	-0.0624251	0.0651107	0.121563	-0.195011	0.007689	0.161013	-0.0367327	-0.0298057	0.0925512	-0.10114	0.000412	0.0562262	0.00916052	-0.0452776	0.00631142	-0.0128937	-0.166567	-0.00987101	-0.104844	0.187302	-0.106961	0.528665	-0.073557	0.359554	-0.108288	0.606843	-0.0690687	0.981419	0.00740536	10570141	1700128E19Rik
0.0587778	-0.099319	-0.126542	0.0649657	-0.0990796	-0.181333	-0.0287428	0	0.050343	-0.0598016	-0.0280771	0.0320869	-0.0163364	-0.0185666	0.251465	0.0252595	-0.131187	-0.0747347	0	-0.0875845	0	-0.110239	-0.144063	-0.0308547	0.493345	-0.0580564	0.207635	-0.135942	0.982319	-0.00353439	0.819817	-0.0345601	0.899854	0.0312971	10583159	1700128F08Rik
-0.182843	-0.120079	-0.0946684	-0.0991144	-0.0721421	-0.0385366	-0.0206327	0.101404	0.0509052	-0.0296035	0.114927	0.0718875	-0.000794	0.0939898	0.00594473	-0.0523968	0.0606594	0.00675058	0.0128136	-0.0349565	-0.052084	-0.030045	-0.059474	-0.11407	0.280334	-0.149378	0.490301	-0.134277	0.621678	-0.106235	0.751252	-0.0764882	0.944046	-0.0333673	10420472	1700129C05Rik
0	-0.148769	-0.209563	0.0648098	-0.109002	-0.27607	0.0384078	0.288374	0.00645542	0.0883412	0.153359	-0.084167	-0.0147128	0.0372257	0.184804	-0.0350385	0.00474024	-0.000738	-0.0372529	0.094655	0.103029	-0.406996	-0.125022	-0.0575504	0.0340777	-0.194894	0.135996	-0.182205	0.459357	-0.102754	0.213419	-0.166576	0.688116	0.0834237	10569654	1810010D01Rik
-0.0405459	-0.230923	-0.301653	-0.0271888	-0.131156	-0.236946	0.340558	0.288778	-0.152771	0.299632	0.294177	-0.0561409	0.0176682	0.118498	0.0541334	0.109559	-0.0989204	0	-0.00953865	0.232106	0.0852895	-0.134411	0.0730534	-0.0955224	0.00259782	-0.330441	0.113745	-0.224835	0.288139	-0.164948	0.0777644	-0.264021	0.633969	-0.109109	10382136	1810010H24Rik
-0.163212	-0.268298	-0.112277	-0.130305	-0.330323	-0.110777	-0.0266724	0.00234795	0.107187	-0.00562525	0.0923519	0.140969	0.210673	-0.132418	0.165134	0	0.0583911	-0.024303	0.055675	-0.00425482	-0.107068	-0.332112	-0.201683	-0.223112	0.000806997	-0.237625	0.00324808	-0.266995	0.0342277	-0.197228	0.0799427	-0.167316	0.656784	0.0664371	10469568	1810010K12Rik
-0.613717	-0.590754	0	0.00415039	0.117995	0.701216	-2.71028	-2.13894	-2.94535	-2.22401	-1.60588	-2.30262	-0.227097	0.133571	-0.51815	-0.143495	-1.56935	-1.85027	0.112983	0.355851	0.156543	0.813599	1.12943	0.9895	2.3e-09	2.25766	0.771694	0.140374	0.00654333	1.12419	0.591766	-0.271977	0.014208	-1.04103	10577641	1810011O10Rik
-0.256968	-0.211303	-0.259529	-0.317861	-0.328413	-0.19299	-0.146931	0.113444	0.135924	-0.169338	-0.00751018	0.146967	-0.0871506	0.00369501	0.190388	-0.0109272	0.185723	-0.0130334	0.10837	0.192575	0	-0.155046	-0.0107226	-0.0787644	0.00508094	-0.27327	0.018627	-0.296821	0.0155179	-0.315098	0.00538173	-0.361492	0.254529	-0.179666	10497086	1810013D15Rik
0.00954723	0.192917	0.0894404	-0.0012331	0.199361	0.197085	-0.0497351	0.0153723	0.289249	0.0012331	0.0494795	0.50652	0.131862	-0.238129	-0.293613	0	-0.0492678	0.110369	0.164343	0.0393591	0.175003	-0.0194082	0	-0.0824242	0.921085	-0.0208335	0.310242	0.247813	0.753196	0.0941526	0.976516	-0.0117154	0.721915	0.148464	10433472	1810013L24Rik
-0.0396447	0.371237	-0.267406	0.333602	0.382028	-0.325775	0.284227	-0.357393	-0.113242	0.461737	-0.183547	0.0122767	-0.0409703	-0.263091	2.1471	-0.28132	-0.473812	0.971446	-0.0261278	0.0408287	-0.0660667	0.10888	0	0.340757	0.912031	0.0583306	0.386799	-0.538673	0.996547	0.00356889	0.918635	0.0927956	0.964576	-0.0742053	10497335	1810022K09Rik
-0.0644078	-0.172498	0.0405932	-0.0670595	-0.0687976	0.00230503	-0.0541592	-0.033217	0.30913	-0.0327802	-0.00230455	0.172597	0.0966005	-0.0188603	0	0	-0.0383172	-0.134061	0.0340638	-0.0375357	-0.212296	-0.092864	-0.0476437	0.0093298	0.138549	-0.114855	0.461727	-0.0808908	0.987153	0.00248194	0.914353	0.0169454	0.971031	-0.0112514	10487366	1810024B03Rik
0.0569272	0	0.209931	0.191963	-0.015749	0.21171	0.0667438	-0.0736642	-0.0700703	0.101448	-0.194288	-0.11397	-0.174616	0.227779	-0.00979948	0.0274143	-0.0434709	0.572448	0.0598865	0.0806551	0.064949	0.0353866	0.202293	-0.0652847	0.142575	0.15643	0.539863	0.0946758	0.654214	-0.0763336	0.84221	0.0406334	0.866442	0.0516652	10583694	1810026J23Rik
0.305114	0.544171	0.179337	0.63553	0.885596	0.549701	-0.434863	-0.377594	-1.28725	-0.146345	-0.147569	-0.846139	-0.50598	0.000616	0.439026	0.0144181	0	-0.694752	0.284489	0.158433	0.121736	0.249319	0.317732	0.43985	4.75e-05	1.05654	0.0917239	0.538687	0.0236286	0.743353	0.374932	0.328356	0.756777	0.180941	10603651	1810030O07Rik
0.136148	0.431237	0.0268145	0.19317	0.161131	0.0840301	-0.308359	-0.205337	0.230952	-0.350324	-0.529683	0.285328	0.00868607	0.484953	-0.0710158	0.0582128	0.0952497	-0.205877	-0.0560641	-0.0802622	0.0743008	-0.26302	-0.0117712	-0.15173	0.0404387	0.318326	0.906337	0.0312142	0.412764	0.18956	0.42581	0.192764	0.205704	0.314262	10382838	1810032O08Rik
0.606294	-0.0990219	-0.646129	0.895524	0.239732	-0.21146	-0.732259	-0.279057	-0.534965	-0.13495	-0.0318923	-0.132216	-0.0491085	-0.40016	-0.717087	0.0300717	0.0325894	0.609017	0.695008	0.399951	0.727294	0.0517101	0.20316	0	0.0903043	0.43838	0.130337	0.519609	0.837682	-0.0930696	0.204044	-0.476594	0.962326	0.0458665	10405820	1810034E14Rik
-0.160591	0.182416	-0.0373073	0.0541787	0.401149	0.186276	-0.151816	0	-0.912081	0.163185	0.19031	-0.134424	-0.322115	-0.147549	-0.0858188	0.744862	0.744602	0.499275	0.0153484	0.137609	0.17379	0.662039	0.467921	0.384215	0.0894448	0.245158	0.130714	0.289515	0.00413149	-0.558559	0.988391	-0.00456222	0.0539741	-0.400372	10495826	1810037I17Rik
-0.181097	-0.16734	-0.147614	-0.180526	-0.10608	-0.196671	0.0143695	0.103223	0.169762	0.0256019	0.127004	0.0678515	0.359631	0.0933757	0.164525	-0.0672879	0.0496225	0.0188379	-0.0589528	-0.103167	0.0618038	-0.285759	-0.15631	-0.197777	0.000666955	-0.247857	0.000109574	-0.369065	0.0910063	-0.163612	0.201208	-0.129783	0.771918	0.0500609	10431140	1810041L15Rik
0.403117	-0.0985041	-0.021431	0.0738707	-0.205866	-0.105028	0.0456686	0.149173	0.302991	0.0161595	-0.00265408	0.0854054	0.0802431	-0.0612917	0	0.110304	0.145144	-0.124618	0.0239892	-0.0590382	-0.232193	-0.131891	-0.246758	-0.27624	0.420943	-0.0917641	0.995087	0.00137607	0.852973	-0.0359167	0.593463	0.096774	0.192047	0.22599	10364338	1810043G02Rik
-0.160672	-0.347621	-0.280519	-0.143386	-0.381778	-0.098465	0.156129	0.486122	0.382634	0.341776	0.539815	0.366395	0.133257	0.0273104	-0.00513744	0.0322533	-0.0173716	0.191174	-0.0353594	-0.188368	-0.132739	-0.0942326	0.0579891	-0.0448279	2.33e-08	-0.614219	0.017774	-0.287217	0.0149448	-0.304092	0.415746	-0.116585	0.140943	-0.208383	10593473	1810046K07Rik
-0.118712	-0.19343	-0.0259819	-0.347533	-0.253625	-0.107027	0.0936727	0.436752	0.234374	0.00951099	0.243022	0.231622	0.099155	-0.0919638	0	0.0688314	-0.0170288	-0.120802	0.0385742	0.176642	-0.0377441	-0.126893	-0.162142	-0.252733	0.000754626	-0.382544	0.231031	-0.176782	0.345285	-0.151385	0.13342	-0.233542	0.988433	0.0062046	10460196	1810055G02Rik
0.321788	0.234177	0.076746	-0.140259	-0.242144	-0.397863	0.79115	1.03957	0.448757	0.539379	0.56339	0.106785	0.252695	-0.162566	0.28969	-0.277225	-0.125027	0.309346	0.0539446	0	-0.125178	0.115804	0.0607796	0.110602	0.00646518	-0.606098	0.646353	-0.151199	0.988581	0.00637595	0.998796	-0.000847976	0.841017	-0.120321	10537292	1810058I24Rik
-0.368102	-0.43588	-0.182084	-0.271999	-0.431899	-0.206966	0.135898	0.211924	-0.0113678	0.0440784	0.241394	-0.0133419	-0.0171762	-0.0988336	0.159899	-0.109904	0.0213447	-0.182962	-0.0791278	0.0090704	-0.0659909	-0.355102	0	-0.332871	4.62e-05	-0.417585	0.00842999	-0.330785	0.0865246	-0.225648	0.0387557	-0.270805	0.686808	-0.0868304	10460621	1810058N15Rik
-0.054122	0.193585	-0.189127	-0.0827026	0.0369172	0.0202308	-0.0684333	-0.00278854	0.191418	-0.121784	-0.0870872	0.0672083	0.0332036	0.0327573	-0.0681992	-0.0430436	-0.0957069	0.127417	0.0974345	0	-0.145947	-0.11396	-0.169062	0.118679	0.950388	-0.00895858	0.956197	-0.0117903	0.969314	-0.00875839	0.988688	0.00363445	0.911524	0.0422446	10491547	1810062G17Rik
-0.429791	-0.211144	-0.640561	0.0537281	0.25043	-0.228738	-0.459238	-0.554687	-0.652223	-0.0842824	-0.0129118	0.0141649	-0.0866766	-0.439032	-0.618069	2.66643	0.92093	1.77717	0.0916963	0	-0.204519	0.00538015	0.0150194	0.263275	0.712362	0.090517	0.582245	0.180247	5.43e-09	-1.98919	0.665714	-0.163405	0.483718	-0.295571	10412978	1810062O18Rik
-0.0976963	-0.136896	0.00917721	-0.105975	-0.0799994	-0.0144329	-0.0489035	0.192472	0.0743108	-0.00676584	0.142471	0.0170541	0.152271	0.202283	-0.0902543	0	-0.0306196	0.204919	-0.0107098	0.114449	-0.202066	-0.0415697	-0.117883	-0.230477	0.076324	-0.132743	0.108624	-0.15907	0.225909	-0.12907	0.779344	-0.0381947	0.741907	0.0590063	10591749	1810064F22Rik
0	-0.0858555	-0.0720501	-0.000186	-0.086668	-0.165705	0.0260987	0.14276	-0.00318384	0.0693693	0.0624323	-0.084558	0.115784	0	0.157182	0.0168438	0.0540738	0.0631456	0	-0.00743008	-0.0319271	-0.100244	-0.13118	-0.102808	0.131198	-0.103897	0.0783155	-0.159399	0.249559	-0.113098	0.631891	-0.0552917	0.809751	0.0429999	10376376	1810065E05Rik
-0.0567975	0.102092	-0.015502	-0.166476	-0.0844879	-0.116183	0	0.112713	0.134857	-0.156752	-0.0291219	-0.0495658	-0.0579858	0.0718951	-0.100594	-0.0158367	0.11257	-0.0605025	-0.0328369	0.0101004	0.342356	-0.204855	0.00307179	-0.085	0.590726	-0.0582475	0.871613	-0.0273308	0.674943	-0.0683027	0.276674	-0.162765	0.899468	0.0393689	10404939	2010001K21Rik
-0.0294285	-0.050755	-0.116642	-0.111524	-0.189281	-0.188476	0.00399733	0.0578809	0.0975342	-0.0702715	-0.230225	0.0171795	0	0.0582113	0.0846729	0.0357346	-0.0895839	-0.0197277	0	0.0244503	-0.100586	-0.170654	0.0343246	-0.207091	0.287397	-0.0937003	0.159927	-0.161979	0.495555	-0.0898254	0.522799	-0.0889723	0.999785	0.000122625	10464772	2010003K11Rik
0	-0.0741014	-0.184113	-0.0257897	-0.0490513	-0.186921	0.230649	0	0.116424	0.32846	-0.0111914	0.010838	-0.00520277	-0.0532794	-0.0554996	0.379891	0.151659	0.242942	-0.127521	-0.103364	0.412487	-0.0837607	-0.167719	-0.0556068	0.0289292	-0.199192	0.730777	-0.0486687	0.00503231	-0.344827	0.276537	-0.147196	0.963337	0.0156995	10435508	2010005H15Rik
0.400849	0.10321	-0.0422444	0.17734	0.0458894	-0.0999899	0.2759	0.234617	0.254512	0.126211	0.182615	0.0943203	0.308998	-0.108308	0.176543	-0.0466113	-0.144336	-0.0531549	-0.0563908	-0.0263138	0.0151663	-0.267601	0	-0.197038	0.349456	-0.0971869	0.867153	-0.0282354	0.210303	0.178876	0.448865	0.120022	0.091853	0.252389	10501048	2010016I18Rik
0.027905	-0.073731	0.0917091	-0.0222821	-0.11739	-0.019239	-0.0537929	0.105401	0.0824575	-0.0801005	0.0358501	-0.00503015	0.0462532	0.0138707	0	-0.0145173	-0.0454702	0.137612	-0.0554004	0.0120702	0.0348582	-0.107926	-0.0549087	-0.0345898	0.572247	-0.0329688	0.63248	-0.0388792	0.60325	-0.0447129	0.882475	-0.0160139	0.709047	0.0469704	10601484	2010106E10Rik
0.518398	0.599302	0.314616	0.321085	0.317938	0.101467	0.38719	0.0108633	0.324975	0.223363	-0.172996	-0.0340748	0.343135	-0.227552	-0.104573	0.215309	-0.0533075	-0.120116	-0.194391	-0.228826	-0.49342	0.769644	0.0849762	0.318162	0.240953	0.238914	0.182962	0.358465	0.223552	0.348173	0.0144911	0.66768	0.971205	-0.0287929	10402752	2010107E04Rik
-0.0179949	-0.135163	-0.238937	-0.128325	-0.220404	-0.284606	0.180529	0.136716	-0.0637713	0.110772	0.0587854	-0.0947037	0.0228033	-0.0837183	0.0303788	0.107575	0	-0.0635881	0.00998449	-0.0175061	-0.00522232	-0.168364	-0.0296488	-0.0431514	0.00326419	-0.225626	0.106457	-0.160726	0.072577	-0.185567	0.117377	-0.166657	0.541552	-0.0905168	10543895	2010107G12Rik
-0.0633183	-0.226521	-0.302166	-0.14021	-0.299902	-0.207305	-0.218238	0.243371	0.173055	-0.245757	0.0921693	0.161411	0.104198	-0.0380426	0.123962	-0.0308542	0.321106	-0.038703	0.0902491	0	-0.0750699	-0.217412	-0.150237	-0.265583	0.0116995	-0.240906	0.0300912	-0.269943	0.0241434	-0.29042	0.114721	-0.21163	0.99028	0.00450682	10369525	2010107G23Rik
0.106545	0.0467949	-0.0443406	-0.0484762	0.0811915	-0.111416	0.19515	0.398231	0.353966	0.0801301	0.202501	0.169856	-0.121102	0.618746	0	0.106867	0.110654	-0.0859914	0.0187717	-0.0737252	-0.023531	-0.114846	-0.0996337	-0.032032	0.0191969	-0.228256	0.218137	-0.160832	0.818815	-0.0387935	0.870307	0.0312111	0.69201	0.0872201	10523293	2010109A12Rik
0.117453	-0.0724526	-0.116061	0.0586734	-0.070293	-0.0218825	0.153529	0.145811	0.0932064	0.159133	0.215143	0.168064	-0.0865517	-0.0622296	-0.0883765	-0.0209999	-0.108201	0.0179605	0.0495391	0	-0.00228453	-0.295013	0.0201182	0.190643	0.172153	-0.173241	0.755277	0.0616256	0.933173	0.0196529	0.896348	-0.0331786	0.982725	0.0106568	10429555	2010109I03Rik
-0.0925474	-0.0891552	-0.249338	0.154708	0.0207176	0.0174255	-0.677398	-0.614109	-0.135544	-0.159246	-0.0648236	0.0798302	-0.290261	0.10305	-0.178688	0.343345	0	0.396262	0.439345	0.327987	-0.0209327	0.775281	0.742639	0.685189	0.0926559	0.222183	0.681951	0.0822678	0.119267	-0.286234	0.123324	-0.288498	2.6e-05	-0.774068	10405757	2010111I01Rik
-0.0663266	0.0377197	0.0817046	-0.0298114	-0.0264292	0.0460167	0.151768	0.217683	0.615641	0.0578713	0.173875	0.483941	0.0426192	-0.00458717	0.0329046	0	-0.0238829	-0.0686212	0	-0.108416	0.135579	0.230573	-0.0478172	-0.178073	0.00976479	-0.276317	0.928881	-0.0164999	0.838218	0.0379803	0.993181	-0.00190886	0.989279	0.00558495	10603316	2010204K13Rik
-0.0448008	-0.194431	-0.0928164	-0.0868058	-0.23778	-0.237111	0.0989184	0.287058	0.00947142	-0.136069	0.0530872	-0.207256	-0.013751	0.274923	0.0409465	0.065042	-0.0889025	0.114657	-0.0366488	0.0237322	-0.0663223	-0.271608	-0.205012	-0.32374	0.0813842	-0.166492	0.0467835	-0.249664	0.183417	-0.179223	0.407446	-0.122544	0.527982	0.117829	10354019	2010300C02Rik
0.0327463	0.0278845	0.267491	-0.224844	-0.15039	-0.0144529	1.95431	1.76552	3.10422	1.62126	1.33323	2.71494	3.66764	0.220208	0.793892	0.0263639	-0.0230017	-0.143814	-0.0886164	0.0919089	-0.0596757	-0.138912	-0.171347	-0.165709	1.04e-05	-2.09251	0.00606581	-1.57084	0.964797	0.0365564	0.992518	0.00853364	0.914932	0.148395	10438415	2010309G21Rik;Iglv1;Iglc1;Iglv2;2010309G21Rik;Iglv1
-0.0973101	-0.236856	-0.106611	-0.731468	-0.616984	-0.736936	0.0713882	0.166735	0.297334	-0.212358	-0.275625	-0.050416	0.223512	0.171402	0.0863762	0.0834942	-0.103323	-0.225993	-0.100263	-0.103746	-0.197801	-0.294168	-0.307057	-0.437256	0.00267259	-0.420537	0.00145736	-0.581458	0.0715389	-0.339087	0.141026	-0.287091	0.841212	-0.0748669	10561706	2200002D01Rik
-0.152782	-0.124559	0.0132685	-0.118337	-0.123732	-0.0150909	0.0178785	-0.044446	0.133447	0.0980711	-0.0170279	0.242573	0.120379	-0.0166135	0	0.0842857	-0.00417376	-0.0279379	-0.0920086	-0.0372944	-0.061522	-0.133008	-0.0200329	-0.165855	0.0150062	-0.158621	0.16065	-0.121461	0.263221	-0.104263	0.853578	-0.0232638	0.928143	0.0194263	10552000	2200002J24Rik
-0.0293474	-0.0690608	-0.0673614	-0.0964794	-0.195554	-0.169863	0.298302	0.0445118	0.143413	0.210939	0.00537634	0.095541	0.0932207	0.186286	0.0511117	0.0212727	0.163581	0	-0.0362954	-0.0256414	-0.0231571	-0.14167	-0.0688934	-0.121447	0.000417447	-0.237625	0.0112277	-0.214817	0.059867	-0.166229	0.451735	-0.0762463	0.981305	0.00605901	10544326	2210010C04Rik
-0.0148139	-0.0736485	-0.23942	-0.288384	-0.495257	-0.406535	0.247954	0.22504	0.227233	-0.0881004	0.0266671	0.0752492	0.204947	-0.0536184	-0.0283155	0.114183	0.194288	0.510384	-0.0740776	0.0521274	-0.0172977	-0.422641	-0.309199	-0.455118	0.00151775	-0.372017	0.049772	-0.294014	0.000655863	-0.525961	0.139231	-0.239927	0.51943	0.142643	10580058	2210011C24Rik
1.19921	1.04106	0.801417	1.06685	0.882827	0.685156	0.143416	0.719539	0.213244	-0.0659142	0.41485	0.0213118	0.430715	0.0778294	-0.052547	-1.26973	-1.3198	-1.02622	0.386105	0	0.278763	0.204816	-0.156359	-0.00810146	0.00115311	0.705013	0.00428474	0.794088	1.99e-10	2.15134	0.010897	0.724465	0.00111701	0.932635	10409684	2210016F16Rik
0	-0.0677939	-0.15349	-0.036634	-0.10904	-0.149413	-0.202569	-0.702365	0.076283	-0.418193	-0.668266	-0.0121417	0	0.0782714	-0.0904331	-0.370937	0.011085	0.317101	-0.0780621	0	0.0633249	0.220323	0.241729	0.229682	0.32325	0.235147	0.827969	-0.0820079	0.861317	-0.0718115	0.857418	-0.0811494	0.467487	-0.31664	10524640	2210016L21Rik
0.0747933	-0.120073	-0.284434	-0.0819488	-0.27182	-0.244928	0.0399022	0.0455251	0.194955	-0.0419822	-0.00692701	0.0710869	0.0769262	0.0879765	0	-0.0559707	0.0206442	-0.0764699	0.0317912	-0.0560307	-0.0997605	-0.0788684	-0.00695419	-0.287557	0.0393426	-0.205162	0.111924	-0.209703	0.430989	-0.11747	0.471868	-0.113402	0.927055	-0.0302751	10529544	2210406O10Rik
0.0506639	-0.0258527	-0.0252929	-0.0051856	-0.0607863	-0.0577712	-0.045176	0.149643	0.122303	-0.0828867	0.0413494	0.00188112	0.020268	-0.0501771	0.0883155	-0.0073061	-0.0166407	0.0109601	0.0043335	-0.0373988	-0.0108662	-0.0774536	-0.103207	-0.09164	0.274972	-0.0518898	0.554975	-0.0401729	0.842046	-0.0163752	0.952424	-0.00606028	0.404527	0.0700626	10386197	2210407C18Rik
-0.0308991	0.13692	0.111431	0.308895	0.618274	0.466651	-0.494648	-0.348469	-0.637503	-0.0878315	-0.0550189	-0.11753	-0.321447	-0.42815	-0.314229	0.17077	-0.147052	-0.144039	0	-0.160864	0.0492129	0.606669	0.304313	0.142076	0.00142692	0.558712	0.00554216	0.623154	0.199345	0.308652	0.2179	0.305762	0.866863	-0.0824739	10406364	2210408I21Rik
-0.115511	-0.235219	-0.223448	-0.125474	-0.279158	-0.247045	-0.151325	0.165808	-0.0533686	-0.188174	0.104999	-0.0902476	0.247521	0.227332	0.227248	-0.070878	-0.0154138	0.0411582	0.0875726	-0.0589013	0	-0.259286	-0.0963759	-0.145227	0.0315156	-0.168924	4.91e-05	-0.438343	0.0799614	-0.189265	0.0483109	-0.213866	0.870278	-0.037346	10380250	2210409E12Rik
-0.355377	-0.374406	-0.24021	-0.436758	-0.481777	-0.35319	0.0977406	0.0686116	0.0101638	0.110893	0.0396829	0.0521617	0.019897	0.0148258	0.0177178	-0.0805779	-0.150225	-0.114619	0	-0.0464726	0.00838757	-0.237557	-0.177523	-0.236076	5.3e-05	-0.436829	0.00340578	-0.3911	0.0615004	-0.258479	0.00813138	-0.360925	0.381102	-0.156568	10444886	2300002M23Rik
-0.137986	-0.265724	-0.346429	-0.156572	-0.258118	-0.437924	0.0209646	0.136237	0.296603	0.00221634	0.19529	0.295618	0	-0.167563	0.0892754	-0.0470104	-0.127638	-0.0268698	0.198953	0.0227184	-0.0066042	-0.376721	-0.190229	-0.342844	0.000119601	-0.424947	0.0790007	-0.24103	0.171929	-0.199953	0.0165764	-0.338815	0.913388	0.0361393	10390934	2300003K06Rik;Gm11595;Gm11563;Gm11564;Gm11596;Krtap4-9;Krtap4-8;Krtap4-1;Krtap4-7;Krtap4-6;Krtap4-2
-0.0798521	-0.0990448	-0.252974	-0.00365734	0.0428991	-0.315335	0.187756	0.0654993	-0.164415	0.177677	0.131297	-0.0339804	-0.0264921	-0.217341	-0.364739	0.224423	0.0403171	-0.037375	0.0174494	-0.174544	0	0.0373335	0.098619	0.0637202	0.101439	-0.178633	0.598013	0.0848636	0.209321	-0.193782	0.731909	-0.0656292	0.321917	-0.184552	10594377	2300009A05Rik
0	-0.286167	-0.0497584	0.0700135	-0.161074	-0.0193548	-0.0317059	0.0654054	0.255248	-0.0158715	0.194087	0.19168	-0.00790691	0.0102553	0.105796	-0.0351253	0.0670085	0.062439	-0.00328064	0.0883346	0.126925	-0.0890727	-9.44e-05	-0.163652	0.0206552	-0.184197	0.308717	-0.110438	0.363639	-0.105831	0.208062	-0.14505	0.975228	0.009883	10478381	2310001K24Rik
-0.0683217	-0.0643024	-0.133589	-0.154463	-0.105634	-0.0981512	0.050755	0.115314	0.110101	0.0235791	0.111046	0.00853348	0	0.0156746	0.0209784	-0.0313544	-0.0515375	0.136739	0.0280347	-0.0520949	-0.0756659	-0.0814176	-0.0519171	-0.0911765	0.000225469	-0.173965	0.0481849	-0.116294	0.0457816	-0.122026	0.288415	-0.0708347	0.799091	-0.0292397	10513945	2310002L09Rik
-0.0005	-0.0123491	-0.0005	-0.00810862	-0.0266819	-0.0246468	-0.0367956	-0.0471911	0.0437017	-0.0470266	-0.0122881	0.0419674	-0.0772038	-0.0005	0.00432062	0.01615	0.0213227	-0.0005	0.00993586	0	0.00439501	0.000546	0.0342798	-0.0190988	0.954862	-0.00252566	0.838513	0.01233	0.68304	-0.0244553	0.805312	-0.016908	0.87167	-0.0173734	10522904	2310003L06Rik
-0.0641222	-0.18204	-0.214195	-0.105968	-0.369353	-0.326771	0.158126	0.0721478	0.0341735	-0.0511699	-0.00149822	0.102362	0.0423055	-0.2199	0.0625377	0.0747385	0	-0.076848	0.16872	0.00540781	-0.0347629	-0.24896	-0.155343	-0.284321	0.00839732	-0.262765	0.193033	-0.172056	0.127128	-0.209705	0.0599904	-0.256863	0.958783	0.0191332	10356764	2310007B03Rik
0.0204167	0.291667	0.890623	-0.18509	0.184279	0.459866	0.0721636	0.796231	1.1797	-0.166116	0.871725	1.00112	0.265432	0.28008	-0.0882378	0.0274501	0	-0.116164	-0.266627	-0.312841	-0.332945	0.0605006	-0.0780892	-0.0594869	0.202869	-0.348844	0.771735	0.124535	0.454492	0.306532	0.132202	0.581098	0.586671	0.302652	10478523	2310007H11Rik
-0.135249	-0.362906	-0.049736	-0.220372	-0.370918	-0.100823	0.0850883	0.0996423	0.0663199	-0.174603	-0.0365334	-0.00936747	0.179992	-0.0986972	0.0674257	-0.254873	0.18175	0.334821	0	-0.049736	0.190398	-0.232143	-0.294931	-0.264043	0.102639	-0.211758	0.137074	-0.256241	0.101246	-0.2939	0.173472	-0.253555	0.882375	0.0570384	10370777	2310011J03Rik
-0.16114	-0.357714	-0.206162	-0.11736	-0.423571	-0.231067	-0.237261	-0.280311	0.0857759	-0.215881	-0.12882	-0.145052	0.268104	0.246577	0.155031	-0.0201588	0.10277	0.0164175	-0.0251722	-0.00490093	-0.122034	-0.140304	-0.171479	-0.115769	0.164113	-0.0959106	1.53e-06	-0.47274	0.00227865	-0.282512	0.034251	-0.1988	0.37804	-0.106985	10437775	2310015D24Rik
-0.0357947	-0.215926	-0.0503955	0.0494413	-0.222578	-0.0172801	0.0663786	0.115229	-0.104469	0.0293789	-0.00145769	-0.0733781	0.171544	0.0591822	0.176687	-0.00693464	-0.0517173	0.0930057	0.0397448	0.0813875	0.147653	-0.0978241	-0.0197711	-0.28557	0.1883	-0.087369	0.0119775	-0.217893	0.331937	-0.09354	0.0599734	-0.171684	0.739629	0.0522995	10552715	2310016G11Rik
0	0.0203524	0.225108	-0.0464087	0.0353298	0.155016	-0.193432	0.688224	-0.0864525	-0.223239	0.676779	-0.0491972	0.0504518	-0.131512	0.0410767	-0.218383	-0.118835	0.6543	-0.0802679	0.0836234	0.0111055	-0.152636	0.146123	-0.101758	0.693326	-0.0705477	0.760491	0.0782274	0.888556	-0.0407941	0.849169	0.0600793	0.812919	0.10099	10551382	2310022A10Rik
-0.195192	-0.225141	-0.00882721	-0.34776	-0.347073	-0.312463	5.2e-05	0.387464	0.19418	-0.339668	0.0202694	0.00742006	0.011199	-0.119103	0.105507	0.121262	0.460609	0.418961	-0.163253	-0.0760794	0.0154195	-0.285577	0	-0.176931	0.0264033	-0.284362	0.16227	-0.238611	0.00092388	-0.57302	0.40448	-0.164772	0.793074	-0.08524	10582664	2310022B05Rik
-0.269446	-0.256974	-0.243584	-0.100905	-0.100905	-0.0145679	-0.106994	-0.189768	0	-0.1102	-0.00166988	0.0417767	-0.0354047	-0.096118	0.0426397	-0.0796008	0.0921311	0.116006	0.0613828	0.00124311	-0.0761275	0.549081	0.394773	0.408704	0.220399	-0.103254	0.230829	-0.134769	0.0704619	-0.207242	0.183401	-0.159896	4.16e-07	-0.61525	10593413	2310030G06Rik
-0.114287	-0.293268	-0.163304	-0.028352	-0.293871	-0.199856	-0.241449	-0.044528	-0.0920768	-0.213878	-0.112904	0.0382602	0.422279	0.21226	0.0391007	0.0879452	0.245607	0.0666754	0.219204	0.208329	0.18625	-0.245366	-0.0644422	-0.130854	0.76409	-0.0710606	0.116274	-0.406703	0.259154	-0.315566	0.175804	-0.386751	0.956588	-0.035269	10376482;10386368	2310033P09Rik
-0.0208316	-0.0699868	-0.051702	-0.0986323	-0.122489	-0.0840311	0.109158	0.0152178	-0.0288043	0.0618792	-0.0494804	-0.0636349	-0.0206766	0.112618	0.00696707	0.0210924	-0.00379419	-0.0510922	0.0125422	0.0161972	0.0936046	-0.0507746	-0.0655847	0.0587435	0.0612816	-0.0820012	0.0621907	-0.107582	0.321328	-0.0633474	0.0567863	-0.115393	0.513841	-0.0554068	10436748	2310034C09Rik
0.220162	0.380713	0.221006	0.762097	0.975258	0.867628	-0.597271	0.140017	-0.0273151	-0.0470076	0.700114	0.608831	-0.542857	-0.00354767	-0.112847	0.0287666	-0.0667915	0.0842085	0.167579	0.0998087	0.133561	0.328559	0.292767	0.400117	0.0348135	0.441583	0.00427157	0.790895	0.0521713	0.55575	0.141927	0.437495	0.591691	0.230663	10349016	2310035C23Rik
0.0133667	0	-0.0385294	0.15924	0.251516	0.195034	0.120575	0.00598621	-0.0377588	0.186794	0.246976	0.00796413	0.076561	0.273874	0.075799	-0.0416222	0.155237	0.212957	-0.0951424	-0.094862	-0.0533085	-0.0576458	0	0.0234079	0.958418	0.00834846	0.834707	-0.0453068	0.961563	-0.0120862	0.38197	0.177876	0.728692	0.108184	10573515	2310036O22Rik
0.14319	0.20056	-0.158117	0.239325	0.0338388	-0.0338388	-0.134388	1.45744	-0.385678	-0.0763989	1.4038	-0.443574	0.91962	-0.0506125	-0.282544	-0.479833	-0.18288	0.495607	-0.210754	-0.14049	0.0637355	0.115723	-0.248231	0.0966406	0.517262	-0.232706	0.820592	-0.124661	0.831606	0.126528	0.789648	0.166663	0.944568	0.0827824	10445627	2310039H08Rik
-0.22212	-0.462953	0.0626793	-0.0072484	-0.280358	0.258617	-0.613075	0.270273	-0.150543	-0.289486	0.317231	0.00724888	2.07109	3.17823	0.563463	-0.546837	-0.651856	-0.450927	-0.487599	-0.184466	0.0783839	1.44854	1.28063	0.761153	0.949115	-0.0321719	0.000301662	-2.04616	0.490416	0.44131	0.916792	0.08933	0.0323808	-1.27201	10522666	2310040G07Rik
0.000668	-0.058187	-0.070435	0.00033	-0.131532	-0.142925	0.0207639	0.121318	0.324108	-0.049993	0.0932155	0.243358	0.163176	0.00300264	0.274081	-0.178795	0.0237989	0.0668888	-0.0173812	-0.0718303	0.0921483	-0.122424	-0.211722	-0.259089	0.0146658	-0.192475	0.0377286	-0.213767	0.777175	-0.0376443	0.601857	-0.0679925	0.332681	0.130732	10572301	2310045n01rik-mef2b;Borcs8;Mef2b
-0.266242	-0.198038	0	0.175487	0.277027	0.700443	-0.17684	0.00952053	0.613578	0.195875	0.390388	0.92508	-0.550178	-0.320183	0.14485	-0.344513	-0.202952	0.292316	0.221607	0.258078	0.417465	0.0657439	0.292847	0.366667	0.357233	-0.211488	0.235285	0.356616	0.566093	0.199829	0.620728	-0.184271	0.832614	-0.126973	10568521	2310057M21Rik
-0.00980902	-0.0133734	-0.0245557	-0.0149527	-0.0517879	-0.0296855	0.118542	0.0256167	0.0802836	0.0271001	0.00222254	0.0279894	0.0335136	0.059968	0.000643	0.0288444	0.0146489	-0.0224051	-0.0297613	-0.0346093	0.0484099	-0.0299978	0	0.108196	0.0736688	-0.0709864	0.307417	-0.0554022	0.621678	-0.0310567	0.798609	-0.0187071	0.514788	-0.0500935	10440669	2310057N15Rik
0.142218	-0.0938072	-0.248538	0.349368	-0.0226641	0.0323834	-0.441732	-0.103563	-0.46067	-0.325856	0.170375	-0.296249	0.17846	-0.558704	-0.66777	-0.0414476	0.237933	0.476584	0	-0.00414372	0.315667	0.397453	0.048543	0.252968	0.339225	0.269442	0.317126	0.375831	0.652207	-0.197863	0.887327	-0.0773479	0.754807	-0.206495	10450614	2310061I04Rik
-0.0818133	-0.223072	-0.165861	-0.0869293	-0.226281	-0.0990858	-0.0155458	0.24089	0.0243912	0	0.242692	0.043282	0.193039	0.0248108	0	-0.00142717	0.148611	0.160734	0.0172343	-0.0461607	-0.111198	-0.0852718	-0.0674019	-0.0967126	0.0130497	-0.236458	0.0782369	-0.21979	0.0537879	-0.249813	0.506999	-0.100466	0.788173	-0.0640449	10440664	2310061N02Rik
-0.0407357	-0.162069	-0.12181	-0.101572	-0.213176	-0.167403	0.0647764	-0.0112867	0.0202179	-0.0178757	-0.072473	-0.0156636	-0.0243516	0.00231981	0.208016	0.0347476	-0.0174165	0.160697	0.0126009	-0.0163598	0.0566793	-0.123369	0	-0.0599637	0.0108099	-0.129077	0.00318012	-0.196455	0.00425114	-0.193804	0.0265842	-0.152101	0.423389	-0.0733499	10368477	2310065H11Rik;2310057J18Rik
-3.18674	-3.2813	-3.17268	-0.438783	-0.451763	-0.519371	-3.29389	-4.16454	-4.52187	-0.657463	-1.19047	-1.41557	-1.43194	0	-1.00954	0.300986	-0.32075	-0.675507	0.233687	0.0676308	-0.175871	-0.259715	0.236337	-0.224334	0.269514	0.69886	0.219358	-1.02795	0.0590368	-1.61002	0.0265652	-1.88359	0.0487135	-1.7592	10514070	2310067E19Rik
-0.129314	-0.140053	0	-0.154003	-0.227014	-0.0191588	-0.00427342	0.23535	-0.0052104	0.0602861	0.0919619	0.0660195	-0.13519	-0.160135	0.0136881	0.10382	0.0616689	0.520663	0.155127	0.0128455	0.0136881	-0.133663	-0.182548	-0.206741	0.131301	-0.185613	0.934758	-0.0177113	0.0418926	-0.340308	0.35662	-0.172144	0.856329	0.0627271	10432571	2310068J16Rik
-0.0425582	-0.0867987	-0.0272112	-0.127463	-0.274949	-0.0636997	0.0925264	0.0314546	0.00643063	0.0212212	0.0971856	-0.120725	-0.0122428	0	0.087266	0.130561	0.0623884	0.114501	0.039289	-0.0376272	-0.271006	-0.0446739	-0.261544	-0.218253	0.173264	-0.125129	0.301823	-0.128788	0.102618	-0.206263	0.943119	-0.0139986	0.745867	0.0710436	10440655	2310079G19Rik
-0.274242	-0.204736	-0.183145	-0.309242	-0.240655	-0.237098	-0.120165	0.0994172	0.0606337	-0.213652	0.00721884	-0.00721931	0.0940275	0	-0.0656743	-0.224305	0.00345278	-0.0572524	0.0952315	0.00281906	-0.0126338	0.427752	-0.00100994	-0.0375299	0.07447	-0.211363	0.111369	-0.251622	0.397353	-0.149501	0.108301	-0.268425	0.0269437	-0.371843	10405121;10405123;10409218	2310081J21Rik
-0.108016	-0.00250959	-0.104122	-0.0451069	-0.0585866	0.0665293	0.00381184	0.12721	0.11719	0.130639	0.25391	0.181669	0	-0.0628419	0.130845	0.0389175	-0.0683889	-0.0521555	0.169236	-0.00993919	0.037982	-0.151542	0.071641	0.0900187	0.0187123	-0.177707	0.556191	-0.0646363	0.914201	-0.0147596	0.344899	-0.107728	0.819415	-0.0453411	10502417	2410002F23Rik
0.0748968	0.40676	0.308851	0.404531	0.803042	0.651688	0.182414	0.495061	0.583112	0.522626	0.900197	0.936274	0.786851	0.226296	1.27599	-0.719541	-0.144294	-0.000262	-0.116891	-0.0318146	0.0798559	-0.116889	-0.0209947	0	0.451799	-0.161652	0.246134	-0.321418	0.00840699	0.729661	0.107835	0.464578	0.114385	0.48759	10552622	2410002F23Rik;2410002F23Rik
-0.030489	0	-0.00188446	0.249145	0.336315	0.235343	-0.224186	0.231422	-0.32942	0.0362892	0.477394	-0.14037	-0.435603	-0.364602	-0.220535	0.15984	0.0572996	0.0568676	0.145941	0.210887	-0.0817985	0.177173	0.245508	0.182803	0.421021	0.122883	0.0143141	0.471652	0.878029	0.0400694	0.892355	0.0397286	0.868241	-0.070423	10496742	2410004B18Rik
-0.0210109	-0.186812	-0.0938668	-0.0705376	-0.2733	-0.117736	0.0627623	-0.140066	0.238734	-0.00646162	-0.018065	0.0335779	0.180876	0	0.0958581	-0.0437279	0.0806055	0.167152	0.0593028	-0.0449867	0.0710058	-0.224651	-0.0957465	-0.322197	0.0578648	-0.155624	0.0417005	-0.219455	0.084425	-0.195221	0.188869	-0.155651	0.612649	0.0869879	10399549	2410004P03Rik
0.596376	0.513418	0.654091	0.139597	0.073698	0.199077	0.551168	-0.302082	-0.331413	0.285886	-0.939166	-0.81807	0.271602	0.120846	0.822131	0.0553389	0.368039	0.335322	-0.250357	0	-0.354507	0.481225	-0.286878	-0.236403	0.0596445	0.621656	0.9421	-0.04215	0.850741	0.109809	0.244559	0.564331	0.571965	0.376728	10452110	2410015M20Rik
-0.117007	0	-0.161143	0.390797	0.303842	0.154991	0.229917	-0.224452	0.484868	0.574087	0.161651	0.794983	0.646216	0.563725	0.468312	-0.254223	-0.303654	0.0227137	1.51663	1.42911	1.52114	0.226863	0.257815	-0.224641	0.427033	-0.241596	0.238453	-0.464172	0.545479	0.273634	0.000420899	-1.39371	0.994638	0.00856734	10397143	2410016O06Rik
-0.0125542	-0.0125542	-0.166379	-0.0670557	-0.10256	-0.25974	0.208981	0.20727	0.353068	0.135334	0.0558186	-0.00817299	-0.0125542	0	0.235241	0.0840988	0.00448799	0.12877	-0.0052104	-0.0273633	0.106418	-0.333427	-0.135656	-0.0563846	0.00292046	-0.26219	0.120218	-0.177703	0.144939	-0.175926	0.324688	-0.128089	0.722224	0.0716817	10444997	2410017I17Rik
-0.440623	0.299436	0.353067	-0.61315	0.0341449	0.0371409	-0.0662217	-0.0864224	0.609307	-0.176083	-0.257145	0.326004	0	0.0923748	0.192901	0.219419	-0.21177	0.126195	0.176637	-0.0855799	0.148934	-0.101528	-0.0218754	-0.220939	0.519556	-0.113237	0.533339	-0.150089	0.716397	-0.0996123	0.62839	-0.134994	0.909298	0.0597834	10394931	2410018L13Rik
0	-0.101902	0.266532	0.216344	0.0875125	0.0817027	0.349692	0	0.0317221	0.126842	-0.0111279	-0.20084	-0.0818319	-0.462172	-0.235375	-0.467245	0.356419	-0.036602	0.0960264	0.170519	-0.0554004	-0.00703001	0.1418	0.237439	0.795598	0.0423168	0.0661421	0.351492	0.529646	0.140841	0.945234	0.0213166	0.95164	-0.0323713	10415572	2410022M11Rik
0.124904	-0.000772	0.0568919	-0.00758553	-0.0204034	0.00224876	0.0446715	0.139918	-0.0219359	-0.0529738	0.0290289	-0.0563417	-0.0725884	0.0850325	0.0673218	-0.0863757	0.140438	1.40759	0.106245	-0.028482	-0.019403	-0.22154	0.224235	-0.146122	0.947624	0.0121527	0.99788	-0.000708023	0.0277972	-0.461337	0.984845	0.00642737	0.869781	0.0736895	10500798	2410024N13Rik
-0.0142016	-0.0553889	-0.195899	6.15e-05	-0.286286	-0.405528	0.00753212	1.01833	0.367797	-0.0228453	0.92997	0.261928	0.0152631	-0.232812	0	-0.129788	-0.182478	-0.0931148	0.139683	0.333354	0.0864191	-0.189036	-0.0525098	0.0327496	0.000192574	-0.58666	0.703881	-0.0870242	0.92918	-0.0244134	0.0987606	-0.346026	0.81912	-0.0899417	10462088	2410080I02Rik
-0.174289	-0.0181618	-0.262283	0.299767	0.376441	-0.0404797	-0.40464	-0.649208	-0.525459	-0.148682	-0.462344	-0.141336	-0.28727	-0.489395	-0.706924	0.167761	-0.0588512	0	0.231791	0.00533581	0.0533967	0.322858	0.553795	0.748509	0.0556103	0.357003	0.0171628	0.516734	0.867992	-0.042191	0.836457	-0.0802697	0.0318671	-0.500946	10422892;10422912;10570002	2410089E03Rik
-0.00367975	-0.0914502	0.0160737	-0.0983477	-0.149611	-0.113506	0.262589	0.163907	0.259712	0.103604	0.0876803	0.0336747	0.0628514	-0.127363	0.231459	-0.00669432	0.108896	0.140692	-0.0866232	-0.0268531	-0.0768685	-0.183405	-0.125763	-0.150835	0.00510354	-0.225281	0.226784	-0.129069	0.165494	-0.154385	0.954137	-0.00997194	0.638252	0.0799144	10436955	2410124H12Rik
-0.0864935	-0.350318	0.0367203	-0.0404682	-0.288173	-0.00386047	0.0207939	0.0764003	0.0792565	0.0365548	0.0300055	-0.00404072	-0.0722933	-0.0145483	0.027957	-0.034718	0	0.0345077	0.00464153	-0.043632	-0.0746083	-0.13275	-0.28824	-0.0176673	0.0648376	-0.161927	0.404359	-0.10247	0.341939	-0.122029	0.55554	-0.0842324	0.935549	0.0241204	10524973	2410131K14Rik
-0.125446	-0.0822463	-0.111925	-0.113448	-0.187762	-0.183412	-0.11411	0.036006	0.113009	-0.114385	0.00572681	0.0663171	0.252796	0.101622	0.0350542	-0.060421	-0.0291896	0.142937	0.103432	-0.0551434	-0.100716	-0.220404	-0.176416	-0.163279	0.0698371	-0.132801	0.00632234	-0.263864	0.137418	-0.151815	0.28476	-0.116564	0.769863	0.0526597	10450835	2410137M14Rik
-0.00236893	-0.170816	-0.217062	-0.0679851	-0.266559	-0.190952	-0.157841	0.168315	-0.125492	-0.243262	-0.0671411	-0.156663	0.305007	0.0816975	0	0.123846	-0.014472	-0.0341559	0.0177541	0.0298004	-0.0614901	-0.148271	0.129657	-0.045289	0.625384	-0.0556097	0.0413689	-0.281525	0.235454	-0.177696	0.354717	-0.147979	0.519974	-0.131323	10434248	2510002D24Rik
0.600948	0.792726	0.627799	0.158921	0.32899	0.189524	-0.508941	-0.463826	-0.603158	-0.923534	-1.03021	-0.756127	-0.37864	0.0167112	-0.214761	0.279027	-0.0201826	0.0352926	0.133217	0.10705	-0.0988312	0.488366	0.506967	0.667013	2.77e-10	1.16412	0.000874356	0.642048	0.0763236	0.351772	0.0424568	0.402673	0.768283	-0.104297	10438572	2510009E07Rik
0.0417719	-0.0403557	0.112693	-0.00982189	-0.120869	0.0885439	-0.0649939	0.130778	-0.00964069	-0.0500565	0.0449676	-0.0121546	-0.116883	0.237735	-0.267498	-0.19022	-0.183774	-0.222917	0.251879	0.179876	0.0580254	-0.238402	-0.0759849	-0.180007	0.960998	0.00551033	0.66607	0.0608759	0.102123	0.210964	0.274576	-0.151266	0.24666	0.176792	10510256	2510039O18Rik
-0.140127	-0.263051	-0.0486231	-0.0836601	-0.302988	-0.183964	-0.0290933	0.102739	-0.0871887	0.0224223	-0.0403237	-0.0471249	-0.0830636	-0.0186062	0.130616	0	0.0385904	0.329259	0.121801	0.198905	0.00810051	-0.471856	-0.377383	-0.175119	0.139041	-0.157307	0.20576	-0.180051	0.0425902	-0.293019	0.055969	-0.280005	0.355429	0.17105	10481380	2600006K01Rik
0.358526	0.476899	0.355672	0.754266	0.81186	0.720806	-0.34039	-0.508815	-0.689189	-0.127477	-0.305779	-0.386107	-0.269705	-0.0619688	-0.450173	0.187284	0.349656	0.355133	0.13534	0.138332	-0.037878	0.131005	0.256759	0.124944	0.000172944	0.972631	0.00913794	0.840287	0.443245	0.282314	0.152127	0.501074	0.332362	0.408769	10543226	2610001J05Rik
0.271922	0.924301	0.5013	0.46283	1.00771	0.578941	0.215934	-0.19866	0.196098	0.353747	-0.131103	0.29804	-0.185338	-1.07797	0	-0.26215	-0.0853558	-0.355484	0.185717	0.14215	0.425137	0.565699	0.63611	0.545401	0.0768694	0.502158	0.00530849	1.04561	0.0259446	0.858831	0.393012	0.373499	0.970358	0.0420973	10606376	2610002M06Rik
-1.05335	-1.10349	-1.18907	0.0141392	-0.00278473	-0.192365	-0.989142	-0.84345	-0.877627	0.116925	0.164309	0.302112	-0.481199	-0.0717678	-0.407343	0.333672	0.076808	0.254274	0.408759	0.124945	-0.00971508	0.201608	0.28131	0.435692	0.413353	-0.233341	0.495902	-0.267716	0.0298003	-0.809405	0.0430634	-0.762483	0.0194596	-0.894023	10570639	2610005L07Rik
-0.821346	-0.708082	-1.07536	0.380921	0.338336	0.0363493	-1.36419	-2.09358	-1.15282	-0.294079	-0.984919	-0.522693	-0.00728321	-0.441757	-0.413193	0	0.204545	0.0119772	0.590742	0.469982	-0.0410061	0.573573	0.605722	0.618329	0.0518946	0.760517	0.97791	-0.0207864	0.528436	-0.380371	0.262203	-0.648103	0.127553	-0.907405	10370544	2610008E11Rik
0.0926776	-0.0633998	0.0894446	0.514381	0.162024	0.386075	0.645605	-0.33213	-0.596438	0.852106	-0.116066	-0.271637	0.122671	0.266656	0.228033	-0.216605	-0.124934	0	-0.131748	-0.107717	-0.168266	0.153373	0.27817	0.354067	0.452672	0.166627	0.982713	-0.00891948	0.313575	0.310713	0.291393	0.332777	0.925484	-0.0650028	10556790	2610020H08Rik
0.157442	0.61293	0.429597	1.00716	1.45676	1.20306	-0.00658178	-0.677292	-0.951405	0.636029	0.142724	0.0671148	-0.0787201	-0.0931592	0	0.0716655	0.353593	0.413248	0.281759	0.132899	0.0869012	0.231299	0.594639	0.362725	0.00317067	0.942727	0.0353226	0.868452	0.235071	0.531656	0.150372	0.643972	0.486626	0.414938	10536061;10552314	2610021A01Rik;Zfp141
-0.0212593	-0.329253	-0.232325	-0.155097	-0.34915	-0.241444	-0.138141	-0.00699711	0.0675416	-0.141509	-0.00767755	0.00767708	0	-0.0243754	0.16787	-0.0911832	0.175498	-0.0644083	0.22559	0.134371	-0.101951	-0.301959	-0.0530524	-0.043324	0.0859763	-0.184904	0.0573302	-0.269253	0.128644	-0.228057	0.037502	-0.307425	0.725312	-0.0886428	10364155	2610028H24Rik
-0.00984573	-0.0762835	-0.0912485	0.00356531	-0.0479169	-0.0726504	0.0520759	0.0358572	0.0209851	0.0607338	0.0275617	0.00216341	-0.120131	-0.0520554	-0.0547523	0	-0.0807118	0.245007	0.0591569	0.158264	0.0467539	-0.171335	-0.130082	-0.113998	0.257788	-0.0822928	0.818222	0.0265828	0.319859	-0.103828	0.18359	-0.137121	0.520113	0.0894083	10554712	2610206C17Rik
-0.234884	-0.591854	-0.400056	-0.117488	-0.408022	-0.204341	-0.105992	0.204032	-0.0195189	0.0817862	0.048172	-0.048172	-0.332683	-0.106336	0.0287819	0	0.0572023	0.0913572	0.276838	-0.00762081	0.51592	0.199926	0.198146	0.564854	0.158532	-0.352825	0.607269	-0.189362	0.29882	-0.375627	0.0929352	-0.58782	0.0767769	-0.647083	10503251	2610301B20Rik
-0.0970783	-0.165342	-0.208644	0.0744653	-0.141863	-0.224027	0	0.141907	0.472551	-0.0180435	0.188932	0.332081	0.162289	0.058744	0.101349	-0.0708451	-0.156096	0.245089	-0.0355635	-0.0486865	0	-0.0548272	-0.125221	-0.0981541	0.002236	-0.31332	0.0752647	-0.234542	0.364816	-0.133131	0.54212	-0.0989983	0.914602	-0.0343475	10477942	2610301H18Rik
-0.0971179	0	-0.0293431	-0.220775	-0.0198164	-0.141323	0.129148	0.208804	0.192335	0.058228	0.14101	0.0828457	0.0579562	0.155497	0.269301	0.127531	0.0995803	0.0601211	0.0310202	-0.0750079	-0.0927625	-0.0627398	-0.0860629	-0.275228	0.00477395	-0.220124	0.0149387	-0.245647	0.0885384	-0.180473	0.779344	-0.0391458	0.762293	0.0566144	10595892	2610303G11Rik
0.0181332	-0.0148351	-0.124069	-0.104869	-0.142992	-0.21869	0.913994	0.91962	0.84285	0.659641	0.637813	0.539643	0.395995	-0.0639682	0.835327	-0.0887954	0.0065186	0.0347292	-0.131328	-0.0966012	-0.00810123	-0.107172	-0.17908	-0.109535	1.23e-05	-0.850148	0.0313539	-0.487005	0.764893	-0.082038	0.858048	-0.0192103	0.952164	0.0340416	10438091;10455967	2610318N02Rik
0.740998	0.75394	0.771334	0.461187	0.597055	0.532036	-0.254315	-0.351131	-0.542562	-0.507935	-0.685801	-0.994514	-0.251565	0.241228	-0.227871	-0.11845	0.0244522	0.192114	0	-0.0399513	0.00100994	0.276855	0.0688086	0.16262	8.02e-09	1.1988	0.00158687	0.722161	0.00851266	0.610053	0.00467493	0.655739	0.0556444	0.473331	10379075	2610507B11Rik
0.6688	1.18633	0.724667	0.365999	1.01201	0.276514	0.475108	-0.0610018	0.422147	0.234806	-0.483324	0.163009	-0.350239	0.398285	-0.294008	0.232193	0	-1.01036	-0.367508	-0.362123	-0.890672	0.0760298	-0.246713	0.396808	0.107335	0.580595	0.097986	0.787706	0.0499065	0.965107	0.010606	1.24582	0.29906	0.630344	10532896	2610524H06Rik
0.0482445	-0.011694	-0.356027	0.0117798	0.0580645	-0.365154	0.160029	0.193427	-0.131377	-0.0117793	0.0429645	-0.0963397	0.0823903	-0.174543	-0.123621	-0.10866	0.0951614	0.141017	0	0.0535917	-0.190299	-0.502407	-0.371796	-0.450814	0.251505	-0.128618	0.869059	-0.0305398	0.372972	-0.144971	0.776825	-0.0568953	0.0296988	0.339208	10419034	2610528A11Rik
-0.227042	0.071156	-0.039712	-0.284069	0.0213041	-0.0319352	-0.183438	0.132995	-0.11564	-0.0307136	-0.000988	-0.136232	0.0926747	-0.0623183	-0.0492997	0.197282	-0.163744	0	0.14616	0.00805473	-0.00758219	1.30966	0.0927658	0.197715	0.869875	-0.0260468	0.723854	-0.0754019	0.676744	-0.0928956	0.561995	-0.130594	0.00104686	-0.615096	10507551	2610528J11Rik
-0.0706053	-0.0574059	-0.166116	-0.0864644	-0.0265741	-0.101961	-0.194652	0.0947475	-0.0945849	-0.15327	0.0692215	-0.0401888	-0.00659418	-0.121848	-0.175285	1.52257	1.67729	1.76463	0.237429	0.386929	0.400327	-0.268395	-0.121601	-0.210421	0.69706	-0.0317333	0.896927	0.016388	3.45e-21	-1.73968	3.06e-05	-0.426416	0.381203	0.115285	10459329	2700046A07Rik
-0.244943	-0.0868444	-0.246061	-0.161833	-0.198992	-0.251002	-0.00358343	0.0302329	-0.22272	-0.151324	-0.0115366	-0.195267	0.00374079	-0.108397	0	0.103527	-0.113292	-0.110917	0.0648408	-0.0565829	0.272105	0.0713506	-0.0655026	-0.0774798	0.254066	-0.105913	0.182093	-0.163394	0.224602	-0.158052	0.0191113	-0.291734	0.242759	-0.174402	10462501	2700046G09Rik
-0.110226	-0.101264	-0.383672	0.486739	0.511464	0.143191	0	-0.20514	-0.652231	0.431337	0.210215	-0.121172	-0.260088	-0.140912	-0.585288	0.00499582	0.103593	-0.048275	0.250474	0.0498233	-0.0253444	0.133716	0.338263	0.373827	0.41274	0.147204	0.0647689	0.419801	0.812996	0.070934	0.99891	-0.000612104	0.590393	-0.190896	10396237	2700049A03Rik
0.15054	0.28967	0.127174	0.414266	0.569499	0.333315	-0.408547	-0.576336	-0.524865	-0.257412	-0.320717	-0.474814	-0.183089	-0.057498	-0.149387	0.0782247	-0.111175	0.149868	-0.0116401	0.0513053	-0.0420389	0.359269	0.34207	0.365634	3.8e-06	0.741193	0.0373019	0.444069	0.218765	0.275105	0.133253	0.314868	0.465579	-0.04158	10417778;10499425	2700060E02Rik
0.173861	0.00410557	-0.0738258	0.230802	-0.00548983	-0.130405	0.59767	-0.30848	0.190934	0.571853	-0.33083	0.131291	-0.0996613	1.26544	-0.74646	0.273659	0.388952	0.430658	0.257657	-0.0160604	0.257799	0.125808	0.208885	0.0896983	0.701362	-0.108899	0.795844	-0.106597	0.385197	-0.331249	0.776006	-0.133291	0.890459	-0.108289	10454326	2700062C07Rik
-0.19987	-0.600041	-0.268656	-0.16869	-0.351938	-0.229329	-0.154015	0.121943	-0.229512	-0.0911999	-0.0361519	0.0396037	0.0397816	-0.11321	0.0538392	-0.162789	0	-0.231484	0.178299	0.106261	0.110384	-0.114636	0.0716882	-0.136601	0.0228751	-0.244865	0.0352176	-0.296558	0.266133	-0.171663	0.00271177	-0.434735	0.139399	-0.243237	10461071	2700081O15Rik
0.180759	0.242377	0.217327	-0.17958	-0.180895	-0.133106	1.01307	0.496714	0.498496	0.614485	0.138362	0.0559044	0.758678	0.599763	0.529164	-0.500401	0.0198841	0.0636473	-0.691938	-0.855308	-0.99054	0	0.225909	0.162951	0.158878	-0.445025	0.148768	-0.604721	0.756887	0.163437	0.0444281	0.870409	0.917131	-0.10514	10484425	2700094K13Rik
0	0.0895858	-0.165195	0.259242	0.449989	0.0542545	0.0362873	-0.714164	-0.0567303	0.342295	-0.349781	0.313317	-0.18185	0.198219	0.431887	0.410333	0.323027	1.17106	0.646789	0.176099	0.245033	0.669541	0.140353	0.31629	0.458483	0.186109	0.934234	-0.0347724	0.117796	-0.520161	0.533018	-0.241328	0.597597	-0.260749	10400383	2700097O09Rik
0.212612	0.0448437	0	0.0826826	-0.00781822	0.0158176	-0.107217	0.317603	-0.368337	-0.181352	0.24032	-0.418036	-0.266319	-0.0487633	0.061676	-0.0367031	0.190676	-0.3618	-0.0388441	0.058445	0.00469303	-0.257323	-0.101134	-0.143678	0.457877	0.144193	0.602349	0.142492	0.670185	0.127299	0.89299	0.049925	0.535251	0.225401	10431282	2810001A02Rik
-0.190519	-0.154884	-0.0902715	0.219453	0.236805	0.333383	-0.365138	0.0287437	-0.565958	-0.130246	0.218623	-0.327184	0.112135	-0.229605	-0.548907	0.169958	0.194553	0	0.174371	0.109941	-0.193249	0.218872	0.572956	0.262483	0.180519	0.249188	0.262276	0.28112	0.848493	-0.0625092	0.942453	0.02864	0.3693	-0.292443	10474093	2810002D19Rik
-0.127789	0.0407896	0.224125	-0.382445	-0.146422	-0.0763788	0.0419664	-0.0354066	-0.212746	-0.199544	-0.288333	-0.312251	0.152538	0.622172	0.239541	0	0.123057	0.282056	-0.106362	-0.0434623	0.103672	0.202037	0.114518	0.126562	0.560759	0.0896986	0.0281343	-0.416104	0.311137	-0.213058	0.818139	-0.0626361	0.377192	-0.225726	10582699	2810004N23Rik
0.201034	0.168608	0.237018	0.0663958	0.143669	0.0550122	-0.0417194	-0.158053	0	-0.0531983	-0.14263	-0.0876489	-0.145431	-0.00496054	-0.283352	0.13127	0.473842	0.201153	-0.122244	-0.0452871	-0.274222	0.0759215	0.103347	0	0.0234198	0.225831	0.0263269	0.289871	0.403409	-0.123465	0.0314881	0.292541	0.709605	0.0855331	10525726	2810006K23Rik
-0.109648	0.385219	0.060256	-0.0466962	0.224578	-0.0226364	0.161734	0.38711	0.481758	0.0367088	0.131586	0.289978	0.00195837	-0.168149	0.01899	-0.124866	-0.221512	-0.348915	0.0973163	0.0684075	-0.00980377	-0.180429	-0.352126	-0.132659	0.111322	-0.1663	0.364622	0.130912	0.0269057	0.31361	0.885612	0.029872	0.0410093	0.303583	10376427	2810021J22Rik
-0.121516	-0.262144	-0.116334	0.352044	0.086977	0.364171	-1.53138	-1.34066	-2.24054	-1.16516	-0.878698	-2.02366	-0.686009	-0.74937	-1.29678	0.0696564	0.218079	0.0602722	0.452586	0.450232	0.272947	-0.22555	0.0592594	0.0433207	2.68e-07	1.58055	0.00642969	0.961251	0.891018	-0.0654694	0.410491	-0.341389	0.914932	0.0915229	10350848	2810025M15Rik
0	-0.0700479	-0.137017	-0.0253692	-0.0397959	-0.105844	-0.0583224	0	0.264273	-0.0488844	-0.0607729	0.13162	-0.147387	0.11871	0	0.0238199	-0.028183	0.175902	-0.0368056	-0.15031	0.155014	-0.181648	-0.0134091	-0.111543	0.148828	-0.100998	0.603819	-0.0534533	0.225377	-0.120192	0.658456	-0.0523117	0.835657	0.0391876	10394389	2810032G03Rik
-0.109822	-0.177358	-0.278114	-0.232336	-0.199011	-0.349998	-0.277273	0.194592	0.126531	-0.190344	0.0476794	0.0257988	0.0765314	-0.0623713	-0.0133467	-0.0814066	-0.0684872	0.0440674	0.0365825	0.0106716	-0.117704	-0.262355	-0.016953	-0.307596	0.0236629	-0.212271	0.0684455	-0.224711	0.149041	-0.189164	0.13062	-0.200956	0.925243	-0.0288051	10424705	2810039B14Rik
-0.202267	-0.179682	-0.364866	0.403244	0.310163	0.0163593	-0.251003	-0.416799	-0.0225	0.329625	0.00614834	0.485667	-0.0188093	0	-0.361002	0.0879879	-0.124339	0.0480776	0.178809	0.577736	0.399273	0.407025	0.488111	0.464152	0.92722	-0.0246976	0.727386	0.123762	0.988362	-0.00675011	0.249629	-0.388114	0.215544	-0.455938	10493292	2810403A07Rik
-0.096488	-0.203167	-0.168742	-0.00673723	-0.111643	-0.120867	0.128269	-0.119703	0.106202	0.218075	-0.0554056	0.151988	0.0629635	-0.125924	-0.0308399	-0.0353846	0.020587	0	0.107872	-0.115375	-0.0553532	-0.0273814	-0.0650296	0.0263786	0.0100001	-0.189512	0.395399	-0.086674	0.283874	-0.113008	0.386606	-0.0969888	0.489725	-0.09593	10436742	2810407A14Rik
-0.381556	-0.417761	-0.301592	-0.113188	-0.228724	-0.182305	0.273423	0.367323	0.234211	0.323159	0.508309	0.184775	-0.17344	0.200524	0.13686	-0.352198	0.0957356	-0.420503	0	0.111591	-0.232995	-0.110457	-0.100319	0.432549	0.000377002	-0.586055	0.118817	-0.325502	0.871296	-0.0451994	0.332856	-0.230387	0.158502	-0.344779	10387723	2810408A11Rik
-0.0918965	-0.35992	-0.144027	-0.0465488	-0.325283	-0.126319	0	0.221831	0.32997	-0.0330801	0.144697	0.156365	-0.0951099	0.145764	0.185461	-0.0134335	0.145072	0.258092	-0.0980821	-0.0459394	-0.0846729	-0.223548	-0.203072	-0.430152	0.00773293	-0.318963	0.0954702	-0.261037	0.0542629	-0.312242	0.58797	-0.106101	0.704597	0.103258	10393749	2810410L24Rik
0.117483	0.622049	-0.060987	0.0960345	0.732328	0.14561	2.77145	2.72622	1.92603	3.35188	3.26667	2.14799	1.30228	1.17789	-0.623602	-0.189393	1.23855	0.903302	-0.319912	-0.150968	-0.34099	0	0.431255	0.674576	8.65e-08	-2.42295	0.541815	-0.343435	0.530002	-0.375399	0.354007	0.546043	0.945278	-0.0931908	10497481	2810416G20Rik
0.816606	0.594684	0.693221	-0.27318	-0.34732	-0.440001	2.53985	2.78653	2.40482	1.47931	1.58815	1.00664	1.39606	1.72491	2.30142	-0.349092	-0.369482	-0.407095	-0.220711	0.136393	-0.388817	-0.0537872	-0.0887275	0.0627995	0.000495425	-1.79355	0.00961525	-1.63346	0.394719	0.549225	0.689395	0.331713	0.878099	0.200574	10350838;10586448	2810417H13Rik
0.0249724	0.0513387	0.000597	-0.169422	-0.252176	-0.330906	0.445771	1.02601	0.0971541	0.165328	0.799082	-0.0987721	-0.00227642	0.13343	0.303408	-0.171361	0.206579	-0.389612	-0.0810995	-0.350734	0	-0.113128	-0.123283	-0.122165	0.00788335	-0.518361	0.33175	-0.257453	0.988758	0.00553203	0.939566	0.0313451	0.993156	0.00692598	10579296	2810428I15Rik
-0.0621858	-0.162118	-0.012053	-0.286901	-0.350572	-0.222039	0.239796	0.109922	-0.150926	0.0247068	-0.0559683	-0.264167	0.119502	0.103495	0	-0.0495672	0.0745416	0.0559955	-0.0320525	0.0330853	-0.0573821	-0.166929	-0.0845714	-0.0768361	0.0450189	-0.166539	0.0184753	-0.256977	0.0659148	-0.209635	0.16945	-0.163862	0.700289	-0.0731994	10348000	2810459M11Rik
-0.0867929	-0.000259	0.00707483	-0.19242	-0.343389	-0.127884	-0.0492234	0.123961	0.305573	-0.168858	-0.0679946	0.235221	0.113187	0.120456	-0.00703001	0.00839043	0.00839043	-0.0326552	-0.0727668	0	-0.0684004	-0.212367	-0.0725884	-0.0529327	0.0224174	-0.187058	0.0637155	-0.199483	0.31933	-0.118653	0.565113	-0.0768892	0.972169	-0.0113157	10380819	2810474C18Rik
0.0546408	0.0225716	0.076396	0.0446053	0.0737658	-0.0159664	0.19895	0.181949	0.273603	0.119394	0.125019	0.0277739	-0.00380039	-0.234877	0.359309	0	-0.194648	-0.045105	-0.138268	-0.0803337	0.0361099	0.661938	0.761119	0.90089	0.51348	-0.111779	0.994055	0.00245809	0.633308	0.122586	0.712843	0.1035	0.000901915	-0.73198	10542885	2810474O19Rik
-0.238872	-0.190808	-0.0438852	-0.166945	-0.226334	-0.0507388	-0.103596	0.297319	0.0425496	-0.0353184	0.216838	-0.0920911	0.139518	-0.0719433	0.0141559	0.230886	0.250233	-0.0152717	0.131517	0.0437059	-0.0136662	-0.165932	-0.113455	-0.0941529	0.0215257	-0.207214	0.13104	-0.180174	0.0112512	-0.308213	0.102044	-0.206783	0.923076	-0.0284174	10520271	2900005J15Rik
-0.0256391	-0.0278587	0.100218	-0.220645	-0.194885	-0.131343	0.0549388	0.365556	0.359978	-0.229959	0.110182	0.0433092	0.163209	-0.124032	0.0768461	-0.0697217	0.121917	-0.03123	-0.0111527	0	-0.0136414	-0.282293	-0.0472827	-0.274932	0.04636	-0.200693	0.384697	-0.122034	0.56625	-0.0903472	0.660796	-0.0750941	0.555578	0.118144	10433709	2900011O08Rik
-0.700718	-1.04544	-1.06556	-0.393799	-0.617087	-0.635158	-0.885669	-0.194531	-0.453311	-0.543948	0.0708094	-0.107881	-0.286876	0.126838	-0.573591	0.165206	0.296895	0.589929	0	0.0618529	0.0759091	-0.468423	-0.12699	-0.222758	0.0434302	-0.390538	0.049906	-0.498417	4.19e-05	-1.09364	0.00253462	-0.78888	0.104403	-0.470236	10532669	2900026A02Rik
-0.00102758	-0.213391	-0.0271177	-0.0400562	-0.225805	-0.0518861	0.0286236	0.080481	0.201002	0.110979	0.0178061	0.104008	-0.023128	0.0735893	-2.48e-05	-0.0340343	0.0905337	0.0628996	-0.0170875	-0.0410805	0.0811567	-0.0983109	0.053206	-0.06353	0.0428844	-0.183697	0.384061	-0.110026	0.314473	-0.133014	0.484206	-0.100877	0.808882	-0.0570023	10382932	2900041M22Rik
0.0821352	-0.00612068	-0.0568562	-0.0180411	-0.156354	-0.111691	0.0591531	0	0.00380611	0.000398	-0.0650325	-0.0149565	0.033555	-0.00902939	0.0670495	0.11577	-0.053504	0.0600462	-0.198527	-0.0947547	0.0341034	0.00755024	-0.179054	-0.0961804	0.600141	-0.041716	0.477254	-0.075013	0.442468	-0.0852588	0.74933	0.0419049	0.818047	0.04474	10455292	2900055J20Rik
0.0182295	0.0117803	0.0597157	-0.00351334	0.00276661	-0.00274372	0.0212555	-0.000769	0.0251427	0.0168991	-0.0247812	0.00701237	-0.0267057	-0.0092721	0	0.0357046	0.0489736	0.0394874	-0.0458474	-0.00238085	-0.00180244	-0.00375557	-0.00188589	0.055922	0.867892	0.00691261	0.622178	0.0263651	0.636218	-0.027016	0.60393	0.0310494	0.98709	-0.00238768	10357135	2900060B14Rik
-0.0168409	-0.046524	-0.0905662	0.00133085	-0.0421705	-0.0557747	0.0396299	0.00442648	0.0224013	0.0480022	0.0167494	-0.00133085	-0.0274348	-0.0509195	-0.0310025	0.00818396	-0.0840087	-0.00172567	-0.017478	-0.0402064	0.0381026	-0.0757375	-0.0945148	0.027338	0.47834	-0.063404	0.973696	-0.00530529	0.918173	-0.0159074	0.82663	-0.0352303	0.986336	0.00588052	10550015	2900092C05Rik
-0.01826	0.108424	0.0447202	-0.0926771	-0.035841	-0.130145	-0.159114	0.375549	0.201536	-0.313712	0.24618	0.0968351	0.0219898	-0.057703	0.18273	0.0112181	0.0823836	0.0882354	-0.0371151	-0.0581334	-0.130254	-0.392968	-0.187585	-0.32627	0.447249	-0.0951757	0.58306	-0.0696357	0.635434	-0.0812423	0.405493	0.0545374	0.168329	0.281644	10489043;10541089	2900097C17Rik
0.00071	0	-0.166772	0.0187988	-0.0807438	-0.126741	0.0641971	0.576193	0.361619	0.019527	0.314249	0.212967	0.100396	0.164812	0.00882864	0.0163755	0.0783787	0.00703621	-0.114003	-0.0794606	-0.044107	0.0135899	-0.156645	0.0528321	0.000247711	-0.31725	0.171434	-0.15047	0.453466	-0.0930549	0.903499	0.0200653	0.911524	-0.0290504	10597095	3000002C10Rik
-0.418426	-0.302651	-0.274415	-0.141746	-0.142914	-0.14702	-0.120048	1.06324	-0.206798	0.153478	0.91585	-0.0377965	-0.237657	2.06618	-0.287623	0.288487	-0.402956	0.173575	0.164412	0	0.00203419	0.0418282	-0.024828	-0.0193377	0.0690664	-0.532516	0.0508982	-0.751494	0.574461	-0.257564	0.536313	-0.293344	0.731065	-0.237083	10542875	3010003L21Rik
0.314041	0.264319	0.111424	0.131955	0.123189	0.208999	0.00686121	0.124928	0.199395	-0.0644231	0.0437622	0.135765	-0.159687	-0.0170283	-0.0357637	0	0.15681	0.0996823	0.0826817	-0.113837	-0.0277214	-0.0365415	-0.0125198	-0.0324693	0.217347	0.11794	0.034184	0.263147	0.454522	0.106824	0.113293	0.211947	0.127784	0.219498	10375704	3010026O09Rik
-0.00121546	-0.257384	-0.220107	-0.0286412	-0.0790596	-0.13185	-0.0853033	-0.0292087	-0.176998	-0.00441265	-0.0274711	0.00441265	-0.212669	-0.202193	-0.0501204	1.31211	0.180392	0.230239	0.176622	0.0147152	0.090549	0.203613	0.0439754	0.120689	0.640327	-0.0665461	0.872824	0.0352846	0.000110202	-0.693958	0.271749	-0.213672	0.261391	-0.242469	10467468	3010085J16Rik
-0.098588	-0.0910883	-0.0197787	-0.160799	-0.0826411	-0.0249834	0	0.215583	0.114496	-0.0665593	0.0332542	0.0530019	0.0446405	0.223617	0.328397	0	-0.00768614	-0.182971	-0.0660109	-0.0139804	-0.0192757	-0.216657	-0.240064	-0.0157023	0.089608	-0.137942	0.00913794	-0.278531	0.913219	-0.0160941	0.746639	-0.0465573	0.662689	0.0778279	10516227	3100002H09Rik
0.186202	0.241997	0.0471516	0.0470095	0.0480976	-0.0333271	0.375737	0.822452	0.537188	0.261092	0.693312	0.408465	-0.0511255	0.0689821	-0.0838928	-0.422525	-0.314671	-0.0838985	0.362249	0	0.247295	0.0117865	0.0178328	-0.0814915	0.00925839	-0.426853	0.647047	0.111534	0.106558	0.36322	0.683265	-0.11366	0.79678	0.106812	10453918	3110002H16Rik
0.00814342	0.0900226	-0.222058	-0.00263643	0.319102	-0.120783	1.12012	-0.66184	0.15863	1.33399	-0.433206	0.0471239	1.05107	0	1.56677	-0.29756	-0.218227	-0.0195799	0.294964	0.374561	-0.253065	0.030715	-0.00915241	0.358205	0.45518	-0.248837	0.0389485	-0.860651	0.716397	0.190421	0.833593	-0.126855	0.909258	-0.114624	10349333	3110009E18Rik
0.23842	-0.0997357	-0.188939	0.0513225	-0.158732	-0.103536	0.088439	0.0972872	-0.0383663	-0.0106654	0.028904	-0.0183291	0.0485587	-0.00992537	-0.0514307	0	-0.0959454	0.0999031	0.0543694	0.0878134	0	-0.0947785	-0.0697651	-0.109943	0.34782	-0.0680784	0.718181	-0.0392677	0.695952	-0.0448527	0.403281	-0.0909278	0.786519	0.0479622	10398193	3110018I06Rik
-0.20489	-0.179257	-0.252597	-0.0781016	-0.0300908	-0.289346	-0.0178738	0.0326848	0.0085516	0.0245819	0.0174007	0.0474939	0	0.128041	-0.0541463	0.178236	-0.180297	-0.0722065	0.0419617	-0.0113983	0.0366359	-0.121403	-0.0388961	0.0957103	0.0696785	-0.191187	0.161364	-0.197012	0.338424	-0.147625	0.202202	-0.19478	0.43612	-0.150851	10541186	3110021A11Rik
0	-0.0294137	0.110464	0.12357	0.157635	0.104487	-0.402232	-0.173363	-0.4778	-0.16145	-0.0375881	-0.306086	-0.305621	-0.371789	-0.409409	-0.416579	-0.383392	-0.404885	0.497867	0.61133	0.248203	1.14198	1.16927	1.21289	0.00353881	0.337544	0.00344368	0.440063	0.00178309	0.479409	0.0151314	-0.374676	1.11e-09	-1.09692	10344743	3110035E14Rik
-0.260017	-0.0400372	-0.260919	0.0123868	0.241519	-0.0547071	-0.022244	-0.360179	0.0463171	-0.0194058	-0.0228929	0.284684	0.608872	0.55764	0.343107	1.13131	0.739532	1.45205	-0.299991	0	-0.408828	-0.290387	-0.343191	-0.0647759	0.819177	-0.0446757	0.0126729	-0.563502	1.76e-06	-1.16793	0.526548	0.175977	0.640915	0.172489	10584595	3110039I08Rik
-0.125611	-0.099787	-0.137312	-0.292156	-0.287853	-0.292661	0.132693	0.139461	0.421117	-0.000611782	-0.0619426	0.273073	0.0319431	-0.0332418	0.143924	0.000900507	0.0248666	0.0136669	-0.00115776	-0.0276034	0.0286479	-0.225658	-0.272952	-0.246047	1.7e-05	-0.356528	0.0272244	-0.253439	0.0708989	-0.219042	0.0483545	-0.205859	0.834092	0.0423222	10350592;10567735	3110040M04Rik
-0.0884976	-0.0309834	-0.219739	0.150592	0.165783	-0.122107	-0.350396	-0.509495	0.200857	-0.163957	-0.47308	0.281306	0.281999	-0.265134	0	0.252159	0.191146	0.764547	0.196677	0.12271	-0.176802	0.286632	0.176555	0.212647	0.470468	0.144969	0.928881	-0.0297804	0.106965	-0.426776	0.845493	-0.0716871	0.49389	-0.249437	10565170	3110040N11Rik
-0.187728	-0.455933	-0.228086	0.0581484	-0.421101	-0.190525	0.0691032	0.283745	0.395439	-0.0418386	0.265115	0.331188	0.142386	-0.137559	0.017981	-0.172706	-0.0386648	0.0950618	0.220243	0	0.149595	-0.22814	-0.131673	-0.357136	0.00501951	-0.454663	0.256986	-0.24514	0.401663	-0.198768	0.109027	-0.360817	0.998464	0.00144569	10399591	3110053B16Rik
-0.228465	-0.0535169	-0.197445	-0.131089	-0.076848	-0.146683	0.000566	0.0800209	-0.108962	0.0597081	0.139638	-0.131774	-0.12614	-0.292981	-0.19754	-0.0783877	0.000566	0.0814028	0.1921	-0.090961	0	-0.430207	-0.165034	0.000236	0.173504	-0.144871	0.668529	0.0666389	0.369696	-0.139778	0.272835	-0.172051	0.833786	0.0599452	10394809;10394816;10394821	3110053B16Rik;Gm4983
-0.164203	-0.369734	-0.246601	-0.0121851	-0.239554	-0.0967264	-0.201496	0.0771446	-0.0457802	-0.0880342	0.279087	0.0391626	0	-0.125301	-0.126758	0.0628481	0.0288367	-0.18356	0.00797224	-0.0222297	0.0414677	-0.291072	-0.153112	-0.0713563	0.042628	-0.198181	0.452437	-0.104148	0.261754	-0.157542	0.158432	-0.197237	0.964576	-0.0163205	10394926	3110053B16Rik;Gm4983;9030624G23Rik
-0.156272	0.0755224	0.108871	0.148358	0.248472	0.416149	-0.519992	-0.148577	-0.430516	-0.249482	0.141266	-0.150749	-0.29791	-0.215375	-0.011486	0.181259	-0.00751209	0.115266	0.0570207	-0.0334196	0.251926	-0.219794	0	0.32873	0.00959356	0.366525	0.0887827	0.315107	0.859835	0.0438459	0.859749	0.048341	0.760593	0.103872	10543872	3110062M04Rik
-0.157762	-0.233554	0.193347	-0.0910406	0.00371933	-0.00957775	-0.116198	-0.164207	-0.0524163	-0.0786138	-0.0356069	0.0661922	-0.107088	0.0783381	-0.117307	0.091392	-0.0594888	0.17476	-0.0659838	-0.110222	0.0415535	0	0.11934	-0.204993	0.894957	0.0143303	0.997801	-0.000459274	0.389687	-0.118033	0.983502	-0.00426062	0.951908	-0.0205934	10412417	3110070M22Rik
-0.196433	-0.250397	-0.282975	-0.279043	-0.357721	-0.264921	0.125204	0.186172	0.182711	0.134864	0.0490799	0.154858	0.062902	-0.225234	-0.132865	-0.11471	-0.0820508	0.0875721	-0.0118723	-0.199141	0.0185022	-0.374282	-0.197294	-0.36528	3.03e-05	-0.41073	0.153331	-0.173516	0.0596151	-0.235519	0.105927	-0.207744	0.881139	0.0403705	10348240	3110079O15Rik
-0.136787	0.293318	0.246747	-0.338663	0.104504	-0.00438404	0.106827	0.0360627	0.30762	-0.0535092	-0.0915923	0.143972	0.326755	0.111829	0.563224	-0.062808	0	-0.0570402	0.0721598	-0.00888729	-0.00234175	-0.469007	-0.528652	-0.438216	0.730694	-0.0474411	0.0614616	-0.30648	0.746528	0.0674051	0.979859	0.00714541	0.00288704	0.50608	10535084	3110082I17Rik
-0.296166	-0.196243	-0.112074	-0.17011	-0.0989413	-0.157458	0.0934377	0.18267	0.0196986	0.0829167	0.167104	-0.00110245	0	0.0798531	0.169576	0.0193763	0.137526	0.157194	-0.0635977	-0.054935	-0.131372	-0.170462	-0.338579	-0.211006	0.000321847	-0.262619	0.00554617	-0.254975	0.00325442	-0.276531	0.412352	-0.0885305	0.65272	0.0681833	10528925	3110082J24Rik
-0.580647	-0.56618	-0.510121	0.310689	0.601378	0.359906	-1.26864	-1.09807	-1.17829	-0.181953	-0.27554	-0.163094	-0.92415	-0.230356	-0.278305	0.14727	0.381587	0.424002	0.658898	0.593669	0.261961	0	0.229841	0.356728	0.0175657	0.630103	0.247493	0.413442	0.321681	-0.381782	0.12939	-0.569005	0.650969	-0.259685	10455146	3222401L13Rik
0.0695939	-0.130245	0.0319257	0.129061	-0.164875	-0.0551043	-0.0377793	0.126009	0.036335	-0.115645	-0.0024991	-0.0275002	-0.0747252	-0.0198374	-0.0121489	-0.0392075	0.0887256	0	0.0166659	0	-0.0718184	-0.21159	-0.0480461	-0.150177	0.832293	-0.0164273	0.892655	0.0156299	0.749387	-0.0364466	0.991328	-0.00155639	0.313743	0.116664	10397703	3300002A11Rik
0.0968061	-0.00740576	0.37049	-0.0276613	-0.0733919	0.293344	0.0728455	0.0403752	0.392606	-0.0555401	-0.0148878	0.30435	-0.250968	0.0250339	-0.0326004	0.0045538	0.369326	0.097723	0.150994	-0.00661421	-0.196777	-0.0581837	-0.186595	0	0.918615	-0.0145947	0.232512	0.194875	0.818185	-0.0485042	0.516526	0.126162	0.37325	0.19029	10488451	3300002I08Rik
0.0821986	-0.0504406	-0.105759	-0.00192881	-0.169331	-0.183516	-0.0351484	0.279734	0.2375	-0.135997	0.0591476	0.115159	0.0615532	-0.0496757	0.132212	-0.0647705	-0.0315318	0.0724196	0.0252669	-0.0295887	0.0288396	-0.172264	-0.0681148	-0.129968	0.0708702	-0.158195	0.339261	-0.119493	0.635001	-0.063502	0.602492	-0.0796354	0.822063	0.0519859	10418842;10418846	3425401B19Rik
0.0572171	-0.0854926	0	0.0706372	-0.0213342	0.00380278	-0.0203071	-0.0510321	-0.0252185	-0.0242314	-0.0403662	-0.0267124	-0.0464101	-0.0053525	-0.0468359	0.04072	0.0936737	-0.0542812	-0.0445261	0.40138	0.802983	-0.038444	0.1241	0.0172691	0.734034	0.0354497	0.806739	0.0370046	0.893421	-0.0225658	0.00265268	-0.382474	0.922167	-0.03017	10605499	3426406K10Rik
0.0301104	-0.231017	0.128393	-0.0405083	-0.214116	0.0831027	-0.0243506	0.0495858	-0.0926299	-0.0193396	0.0137482	-0.0797868	0.329342	-0.0676489	0	-0.00977659	-0.099761	-0.0277596	-0.126341	0.0724745	-0.0496979	0.897505	0	-0.108491	0.918237	-0.0152103	0.475285	-0.127904	0.983819	0.00509326	0.982552	-0.00615088	0.106403	-0.303677	10419416	3632451O06Rik
1.76234	2.28366	1.7351	1.38842	1.84875	1.45253	-0.288089	-0.124431	-0.234104	-0.333511	-0.205204	-0.283309	-0.210554	-0.0363479	0.227729	0.97543	1.22614	1.17679	0.0229235	-0.00350952	0.645335	-0.379034	-0.0772309	-0.27641	6.49e-17	1.98991	3.28e-12	1.75152	0.001172	0.619016	5.06e-11	1.52355	4.72e-14	1.98936	10599680	3830403N18Rik
0.13811	0.292482	-0.029644	0.909488	1.04858	0.915015	-0.512827	-0.118965	-0.271444	0.0523291	0.611837	0.280471	-0.168988	0.083231	-0.463549	-0.110106	-0.00202465	0	0.274586	0.0422172	0.0984716	0.158826	0.135862	0.361989	0.00646371	0.538772	0.00479447	0.728774	0.0281147	0.583049	0.143446	0.407247	0.330562	0.32678	10412701	3830406C13Rik
0.0477123	-0.238969	-0.0278835	0.0517292	-0.047874	0.0163474	0.125265	-0.104062	-0.325654	0.251336	-0.0390997	-0.1113	-0.136003	-0.131763	-0.0988479	0.355086	0.452459	0	0.806019	0.639813	0.317572	0.163518	0.571947	0.706657	0.995117	0.000762939	0.575126	0.0890485	0.0402232	-0.302338	3.06e-05	-0.620958	0.000498609	-0.513863	10407049	3830408C21Rik
-0.135511	-0.0169535	-0.131398	-0.167312	-0.0261617	-0.131231	0.00743914	-0.120585	0.152106	-0.00457287	-0.0852594	0.0726485	0.0340118	-0.0107117	0.0396862	0	-0.0262828	0	-0.0155478	-0.119361	0.0490856	-0.110984	-0.0481882	-0.182035	0.110611	-0.105057	0.163235	-0.122423	0.335103	-0.092667	0.486048	-0.0728203	0.960203	0.012308	10599866	3830417A13Rik
-0.12885	-0.119113	0	-0.202732	-0.242006	-0.0408983	0.0583072	0.361056	0.169914	0.0346351	0.209484	-0.00624752	-0.0543499	0.127706	0.0387053	0.0921597	-0.0778475	-0.20486	0.193838	-0.0104756	-0.177368	-0.353923	-0.0473218	-0.02632	0.00189834	-0.260125	0.141614	-0.15962	0.652985	-0.0587506	0.30967	-0.124265	0.942955	0.0202552	10576967	3930402G23Rik
-0.86743	-0.832264	-0.616072	-0.0173316	0.0449758	0.118871	-0.860156	-1.04728	-0.889518	-0.000854	-0.116932	-0.0949054	-0.825072	0	-0.0623317	0.739329	1.30913	1.3733	-0.196497	-0.335151	-0.7912	0.533441	-0.13255	0.327082	0.562431	0.140066	0.862004	-0.0657405	2.72e-06	-1.50213	0.856986	0.0794078	0.0669522	-0.604199	10466903	4430402I18Rik
-0.162475	-0.0562801	-0.15484	-0.025197	-0.12297	-0.132131	-0.0341654	0	0.0397081	-0.139161	-0.0344887	0.0465651	0.0477428	0.201971	-0.051187	-0.0220113	0.00871658	-0.0895438	0.179565	0.230129	0.0952048	-0.0495119	0.0116892	0	0.362331	-0.0887252	0.164468	-0.175158	0.617554	-0.0747027	0.0316426	-0.277282	0.631326	-0.0963746	10474057	4631405J19Rik
0.00544453	0.25414	-0.0273209	0.440393	0.851861	0.323519	0.141303	0.198449	-0.689632	0.341579	0.125456	-0.363486	0.419792	-0.261597	0.181798	-0.122755	0	0.679229	0.255531	0.0263205	-0.03475	0.418048	0.689109	0.807465	0.152731	0.349061	0.586991	0.194675	0.765487	0.122515	0.5716	0.225639	0.470394	-0.330201	10499652	4632404H12Rik
-0.205677	-0.219507	-0.137835	0.169865	0.284211	0.300497	-0.614055	-0.506599	-0.0476894	-0.213366	-0.0973244	-0.0317945	-0.155542	-0.108555	-0.575458	0.134498	0.356907	0.464594	0.0754528	0.158462	0.43821	0.135683	0.230724	0.126228	0.137852	0.283731	0.224476	0.311778	0.300108	-0.28674	0.533613	-0.192116	0.780912	-0.132286	10490986	4632415L05Rik
-1.21241	-1.35201	-1.26442	-0.147563	-0.316993	-0.161898	-0.587697	-0.647346	-0.447379	0.597141	0.473861	0.848732	-0.0416307	0.373066	-0.149346	0.528219	0.355617	0.24036	0.16563	0	-0.411535	-0.0702467	0.119951	0.162294	0.0163811	-0.782102	0.0596894	-0.803246	0.0108629	-1.11728	0.153796	-0.660581	0.0910001	-0.813216	10565567	4632427E13Rik
-0.105436	-0.336072	-0.272218	-0.153119	-0.427619	-0.34248	0.0710082	0	0.26713	0.0258555	-0.0693355	0.196973	0.0497489	-0.116801	0.0843782	-0.0524736	0.0387144	0.463237	0.253332	0.00965595	-0.0441742	-0.191925	-0.0334754	0	0.00211519	-0.354762	0.0599089	-0.278599	0.00540027	-0.42265	0.0242684	-0.345762	0.296759	-0.19769	10416421	4632427I20Rik
0.0234828	-0.161224	-0.147217	-0.0219445	-0.205662	-0.222745	0.30165	1.01711	0.237207	0.377558	0.96809	0.4126	0.182997	-0.0535374	0.0747576	0	0.0483241	0.0792608	0.115205	-0.00415707	0.0147648	-0.168173	-0.0998282	-0.242414	5.57e-07	-0.674921	0.233082	-0.190624	0.341466	-0.16508	0.362378	-0.164489	0.895936	0.0475867	10534638	4731417B20Rik
-1.42153	-1.5847	-0.957759	-0.758355	-0.709699	-0.195159	-1.06848	-1.1838	-1.29048	-0.290189	-0.408013	-0.61671	-0.333707	0.0769882	0.447007	0.363304	0.474888	0.0730419	-0.462696	-0.357229	0.0775366	-0.411588	-0.0622339	0	0.646122	-0.128255	0.0032517	-1.0013	0.000367411	-1.24161	0.0513595	-0.690404	0.0316912	-0.779927	10493496	4731419I09Rik
0.0184736	-0.0784669	-0.204639	-0.150685	-0.334003	-0.525917	0.243047	0.0217977	0	-0.0730085	-0.0785584	-0.236184	-0.131238	-0.0997872	0.0783896	0.00272036	-0.051929	0.0929394	-0.050384	0.00791454	-0.0195432	-0.478185	-0.285924	-0.36196	0.06247	-0.192055	0.246657	-0.161661	0.112505	-0.227117	0.198614	-0.191869	0.370364	0.162817	10352971	4732440D04Rik
-0.231699	-0.0586672	-0.0654602	-0.340632	-0.126962	-0.101092	-0.0132551	0.081254	-0.15592	-0.153624	-0.0751004	-0.258605	0.0646214	-0.0664454	0	0.00896454	0.0377002	0.0668683	-0.134524	0.0180988	0	0.536606	-0.185417	-0.0524087	0.611116	-0.0582105	0.288424	-0.153477	0.200577	-0.19193	0.495854	-0.115277	0.112297	-0.253679	10401418	4732463B04Rik
0	0.0188727	-0.157895	-0.00596714	-0.117794	-0.2589	0.520627	1.6947	1.05638	0.238654	1.82972	0.737001	-0.0154362	-0.0859852	0.0684867	-0.0594039	-0.140687	-0.0915818	-0.0157199	-0.0873303	0.0226059	0.0088172	0.109374	0.0691361	1.34e-07	-1.0998	0.790502	-0.0759691	0.976413	0.010277	0.864264	-0.0601325	0.722202	-0.14939	10365926	4732465J04Rik
-0.754102	-0.849051	-0.940369	0.120167	-0.201591	-0.11505	-0.382117	-0.744568	-0.739561	0.213591	-0.0106473	-0.0603828	-0.391726	-0.632948	0.0490351	0.186104	0.05972	0.517713	0	0.0614481	0.0032301	-0.648183	-0.567967	-0.254427	0.538739	-0.169385	0.745145	-0.131453	0.0443248	-0.711178	0.203465	-0.478225	0.974652	0.0335263	10551155	4732471J01Rik
0.245652	0.310152	0.0763888	0.392199	0.376153	0.080452	-0.203332	-0.509264	-0.5934	-0.0603852	-0.0851941	-0.120987	0.112001	0.65244	-0.265406	0.0110068	-0.0456538	0.603655	0.0278211	0.00558567	-0.27669	-0.00756121	-0.0655913	0.164437	0.0292282	0.508927	0.832722	0.080488	0.890899	0.0571636	0.355412	0.327927	0.678114	0.216405	10464569	4833408A19Rik
-0.00207806	-0.167038	-0.130042	-0.0639396	-0.210161	-0.136643	0.0749769	0.419408	0.147327	-0.0546622	0.43844	0.140639	-0.0732541	0.0817618	-0.010787	0.00865984	-0.0164175	0.0767326	-0.0314898	-0.155387	0.155343	-0.412663	-0.289285	-0.412393	0.000460318	-0.312672	0.315371	-0.117557	0.24798	-0.141309	0.41703	-0.107806	0.0370819	0.25313	10443814	4833413E03Rik
0.00397539	0.0413737	-0.285658	-0.0197034	-0.0362468	-0.159958	0.110531	0.095108	0.101812	0.029799	-0.0591583	0.0244632	-0.154881	0.0201745	0.0381603	-0.0904031	-0.0655289	0.0281591	-0.138997	-0.0862551	0.0226722	-0.348382	-0.131994	-0.251033	0.0635522	-0.126462	0.670811	-0.0438542	0.771785	-0.0334454	0.95453	-0.00850964	0.0991479	0.167767	10554586	4833418N17Rik
0.273403	0.370827	0.127308	0.90863	0.893437	0.588454	-0.049962	-0.1867	-0.374021	0.299576	0.168253	0.00246811	-0.442154	-0.0341902	-0.754385	0.0160294	-0.13864	0	0.275475	0.0350437	0.0776672	0.220796	0.276872	0.28198	0.0486934	0.550408	0.0107007	0.937253	0.146033	0.56788	0.347659	0.397615	0.663285	0.267128	10407370	4833420G17Rik
0.104094	-0.0255938	-0.0866418	0.0307407	-0.103978	-0.139514	-0.00225735	0.195437	0.206329	0.0477562	0.0200348	0.166413	0.0167279	-0.0252409	-0.0517406	-0.044385	-0.0583491	-0.0629806	0.0636697	0.115527	0.0138063	0	-0.0218086	0.00896645	0.0146673	-0.142434	0.862943	-0.0167309	0.857561	0.0184228	0.234058	-0.10115	0.83614	-0.0325347	10410973	4833422C13Rik
0.0669565	-0.0452333	-0.00940418	-0.0137033	-0.116511	-0.10927	-0.0563932	0.0178499	0.00972843	-0.0968499	-0.0335908	-0.00244379	-0.0481687	0.0548258	0	-0.0423198	0.0336246	0.0683689	0.0871096	0.0584078	-0.0326791	-0.0571165	0.0220537	0	0.82791	-0.0109109	0.531005	-0.0400798	0.374348	-0.0577521	0.244377	-0.0754735	0.823391	-0.0261732	10484520	4833423E24Rik
0	-0.106292	-0.104909	-0.0479736	-0.125193	-0.123906	0.0243096	0.0191598	0.07095	-0.00103808	-0.0417857	0.0739093	0.0357232	-0.0156369	0	0	-0.0396099	0.152829	0.00927305	0.0179219	-0.0513368	-0.101581	-0.0745954	-0.0622587	0.0591783	-0.108963	0.241401	-0.0914076	0.128235	-0.122452	0.387834	-0.0766649	0.981709	-0.00523376	10593460	4833427G06Rik
-0.233273	-0.264111	-0.460957	0.219591	0.137451	0.126697	-0.605843	-0.326852	-0.482681	-0.208451	-0.0509262	0.0509262	-0.970018	-0.38169	-0.514379	0.282764	0.722242	0.811677	0.232974	0	0.275291	1.12043	0.405718	0.182537	0.455934	0.191538	0.093207	0.542929	0.0402743	-0.684661	0.530264	-0.248522	0.0693814	-0.648662	10409330	4833439L19Rik
-0.134721	-0.0451703	-0.218713	-0.173609	-0.0729437	-0.156045	-0.0872321	0.187036	0.165233	-0.154898	0.0810122	0.131502	0	0.0949206	-0.00680733	0.0146461	-0.0275011	0.051085	0	-0.0121999	0	-0.279103	-0.287561	-0.0722604	0.0998619	-0.187309	0.293977	-0.162905	0.383876	-0.146277	0.471904	-0.129467	0.778692	0.0794412	10449977	4921501E09Rik
-0.0330682	-0.0636749	-0.0229149	-0.0683956	-0.0752969	-0.077754	-0.0258174	0.0144663	-0.0775986	-0.028605	-0.0208197	-0.0857644	-0.0781736	0.0496755	0.0144663	0.0838962	-0.0396152	0.00244904	-0.00448418	0.0192647	-0.0179787	-0.0935373	0.0396981	-0.0518031	0.935408	-0.0194943	0.878646	-0.0521735	0.838692	-0.0724274	0.890329	-0.0557847	0.979313	-0.0216366	10480360	4921504E06Rik
-0.487934	-0.622584	-0.457652	-0.141496	-0.204457	-0.11893	-0.190255	-0.172889	-0.409504	-0.0976558	0.0863881	0.0192308	-0.191376	-0.640971	-0.38117	0.263593	0.377668	0.116272	0.0680242	-0.0504522	-0.213898	0.0598755	0.0319076	0.36853	0.0657668	-0.211395	0.710745	0.0656633	0.000162309	-0.591354	0.0899504	-0.2734	0.00165109	-0.49228	10544689	4921507P07Rik
-0.104248	-0.0469432	-0.0162005	-0.0983782	0.00689411	0.000946	-0.105792	0.000243	0.0286961	-0.136395	-0.000584	0.130019	-0.0100932	0.00189114	0.0684457	-0.0733533	0.0231309	0.0131097	-0.059093	0	0.155315	-0.0334153	-0.100379	-0.0503759	0.681375	-0.0290193	0.496595	-0.0630694	0.780438	-0.0306173	0.461776	-0.0750622	0.932706	0.018402	10476342	4921508D12Rik
-0.281496	-0.253812	-0.158789	-0.278897	-0.174704	-0.18956	0.00798941	0.0629935	0.100069	0.0154777	0.00589991	0.170085	-0.0645375	-0.146346	-0.190904	-0.0836382	0	-0.345462	0.0211639	0.189735	0.000225	-0.218056	-0.365665	-0.317127	0.179953	-0.283296	0.789878	-0.0889474	0.828388	-0.079843	0.359116	-0.293251	0.906607	0.0774063	10400002	4921508M14Rik
0.0111923	-0.341802	-0.239249	0.0358596	-0.283061	-0.123462	-0.0746279	0.359891	-0.065001	-0.0545936	0.157222	-0.188172	-0.101384	0.392233	-0.189881	0.0962739	0.0141234	0.113124	-0.0799265	0.0277271	0.110168	-0.142178	-0.125425	-0.183583	0.508937	-0.179207	0.617335	-0.19041	0.564272	-0.231261	0.690461	-0.176076	0.995616	-0.00635799	10488553	4921509C19Rik
-0.057342	-0.0394483	0	-0.0625334	-0.0503306	-0.0112152	-0.0866132	-0.0310283	-0.1264	-0.028017	-0.00909233	-0.115475	0.0371614	0.00110817	0	0.0141683	0.0353084	-0.055006	0	0	0.0241222	-0.0357046	-0.00626898	-0.027317	0.6062	0.0292927	0.514225	-0.0495681	0.682381	-0.0349685	0.609389	-0.0448523	0.939715	-0.0137147	10601607	4921511C20Rik
-0.0284729	-0.0989199	0	0.0025363	-0.0922098	-0.0606413	-0.0921397	-0.0366254	-0.0186539	-0.0990944	-0.00459957	-0.0539555	0.0908723	0.0482793	0.0245585	0.00336599	-0.00320053	0.0457153	-0.0696731	0.0792661	0.00976515	-0.152103	-0.0976481	-0.0300036	0.948546	0.00456015	0.202184	-0.100855	0.493458	-0.0615782	0.588213	-0.0527373	0.737877	0.0469671	10519490	4921511H03Rik
0.0569239	-0.0192094	0	0.0404625	-0.00230265	-0.0310817	0.0896583	0.0435348	0.00606012	0.0565267	0.0246263	-0.01302	0.00156403	-0.0479512	-0.0297442	-0.053309	-0.0360813	0.0726194	-0.0589576	-0.0726819	-0.0546899	-0.0728173	-0.0500207	-0.0499668	0.643976	-0.0272171	0.697541	0.0321885	0.885598	0.0122306	0.387788	0.0713108	0.547061	0.0640793	10607409;10607412;10607415	4921511M17Rik;Gm16445;Gm15140;Gm10057;Samt1
-0.323566	-0.216356	-0.270646	-0.0965414	-0.0787883	-0.0966096	-0.274746	-0.297718	0.0170221	-0.104141	-0.106541	0.188314	0.129686	0.22789	-0.102429	-0.210785	-0.29808	-0.118351	0.352808	0.349651	0.10608	0.0436587	0	0.165769	0.374744	-0.0841161	0.0272273	-0.265467	0.859835	0.0286545	0.000298732	-0.449931	0.0589192	-0.250227	10366649	4921513I03Rik
0.364711	0.0271921	-0.0306191	0.0715179	-0.172718	0.0241127	-0.188135	0.32223	0.152006	-0.188033	0.0138574	-0.099905	0.113459	-0.152508	-0.182298	-0.196974	0.0805512	0.318518	-0.0930262	-0.106131	0.16348	-0.211251	-0.198678	-0.303502	0.792979	0.0453626	0.593064	0.121149	0.944239	-0.019999	0.84074	0.0592585	0.259276	0.285176	10509927	4921514A10Rik
-0.108273	-0.506	-0.246589	-0.0349898	-0.278229	-0.180439	0.0206857	0.0303125	0.023612	-0.0683603	0.000659	-0.0697417	-0.0739918	0.102197	0.16001	0.300972	0.0315061	-0.00486708	0.0791454	-0.148878	-0.0192771	-0.334977	-0.333176	-0.248844	0.0273024	-0.215281	0.0240791	-0.288492	0.0110011	-0.334957	0.159501	-0.196083	0.726542	0.0799123	10409779	4921517D22Rik
-0.191117	0.0666432	-0.26512	0.00629997	0.123159	-0.209046	0.753984	-0.347621	-0.273491	0.449425	-0.150085	-0.0735297	-0.541456	-0.460736	-0.121623	-0.00765944	-0.264205	-0.261272	0.700365	0.393931	0.556852	0.234669	0.147377	0.511744	0.507405	-0.137977	0.267495	0.296408	0.76475	0.099515	0.0190408	-0.62858	0.241464	-0.376127	10570005	4921522P10Rik
-0.0903768	0.142734	0.0239572	0.306455	0.559158	0.558022	-0.0539417	-0.685152	0.210715	0.310604	-0.100213	0.541863	-0.240553	0	-0.553947	0.0845575	0.466791	0.699315	0.344552	0.0479612	0.418439	0.346027	0.365169	0.423617	0.370408	0.212679	0.0898623	0.514825	0.649399	-0.166896	0.968258	-0.0203257	0.83665	-0.128279	10580365	4921524J17Rik
-0.0183287	-0.0314703	0.0562763	-0.00184774	-0.130959	0.0178261	0.134893	0	0.00347996	0.0554719	-0.0151639	0.00184774	0.0135455	0.00928402	0.052887	0.0157161	-0.0144453	0.00789356	0.03336	-0.00338411	-0.0127754	-0.0969358	-0.076858	-0.0289717	0.549212	-0.0481721	0.709381	-0.0433227	0.874811	-0.0211387	0.872822	-0.0238174	0.797521	0.0495046	10453694	4921524L21Rik
0.0845704	-0.131346	-0.115307	0.0657258	-0.11902	-0.0747862	-0.0689249	0.00785589	0.330373	-0.0613871	-0.0198913	0.370258	-0.00644493	-0.0781708	-0.0764875	-0.0405126	0.000778	0.00785589	-0.019918	-0.0502605	0.0874772	-0.124307	-0.0494371	-0.123476	0.368368	-0.141408	0.985431	0.00534058	0.88966	-0.0377343	0.854991	-0.0541267	0.91782	0.0507129	10416727	4921530L21Rik
-0.156294	-0.0510964	-0.086731	-0.238594	0.00548506	-0.121286	0.00271559	0	0.0270801	0.0285187	-0.0839033	0.0225487	-0.0683546	0.0609775	0.416112	-0.0103569	0.128827	-0.00534868	0.0664639	-0.00677538	0.210204	-0.225063	0.0226145	0.0573659	0.431667	-0.107579	0.16242	-0.244331	0.461389	-0.145793	0.314132	-0.19805	0.877098	-0.0597251	10457665	4921533I20Rik
-0.0681343	-0.193426	-0.0628772	-0.0530109	-0.265985	-0.0976353	-0.0663271	0.147527	0.166109	-0.107794	0.120747	0.0640717	0.0730152	-0.0493364	-0.0297174	-0.0954847	-0.0515661	0	-0.0439076	0.0279245	0.0345607	-0.0572763	-0.149139	0.0125031	0.0500477	-0.177567	0.328839	-0.121499	0.602165	-0.0744946	0.344679	-0.129704	0.800171	-0.0588741	10383785	4921536K21Rik
-0.116743	-0.00753975	0	-0.146329	-0.0125189	0.0134997	-0.0972638	0.0893998	0.0094285	-0.0734077	0.0292931	-0.0334945	0.0471072	-0.0195494	0.0479875	-0.0469103	-0.0230579	0.0636363	-0.0116515	-0.0359173	-0.0417013	-0.137976	-0.0506806	-0.106852	0.736023	-0.0322644	0.581644	-0.0701203	0.769761	-0.0428278	0.93354	-0.0151818	0.812446	0.0535642	10514751	4921539E11Rik
-0.000538826	-0.0308847	-0.0905047	-0.0901787	-0.159478	-0.181451	-0.038322	-0.0146704	-0.00017	-0.07201	-0.00999069	-0.127484	-0.0293353	0.133596	0.0213127	0.0348062	0.0727387	0.00569725	0.0864863	-0.0192819	0.00415897	-0.149026	-0.036912	-0.172615	0.512741	-0.0483982	0.349299	-0.134031	0.136814	-0.12992	0.23043	-0.115961	0.901533	0.0273447	10581571;10581573	4922502B01Rik
-0.0575109	0	-0.0073061	-0.0353541	-0.00529337	-0.0697827	0.470569	0.167935	0.0165858	0.388715	0.0990038	-0.0507879	-0.100613	-0.0613413	0.0476093	0.0919371	0.00327206	-0.0568557	-0.0126791	0.0778012	-0.01225	-0.143645	-0.0907588	-0.151053	0.00472633	-0.211211	0.945378	0.008907	0.731254	-0.0419923	0.7146	-0.0468319	0.474464	0.0992777	10548340	4922502D21Rik
-0.0068512	0.0590906	-0.0614262	-0.0627875	0.00188255	-0.0871568	0.351711	0.12215	0.14694	0.207285	0.00927067	0.0248146	-0.0068512	-0.0623617	-0.138006	0.00375843	0.00218391	0.078115	-0.0068512	-0.0068512	0.103421	-0.0547991	-0.057025	-0.105693	0.00766604	-0.169903	0.650614	0.042865	0.584071	-0.0542272	0.590787	-0.0561142	0.763621	0.0462975	10482052	4930402F06Rik
-1.08921	-1.19894	-1.26605	-0.0643516	-0.232471	-0.0559463	-1.45861	-1.17839	-1.45694	-0.318265	-0.292987	-0.365625	-0.227283	-0.336318	-0.320508	-0.160372	-0.391669	-0.470616	0.368306	0.322426	0.282522	0.533427	0.678601	0.578831	0.490882	0.193976	0.331342	-0.356457	0.438724	-0.310275	0.00688308	-0.975579	0.000616334	-1.24811	10487748	4930402H24Rik
-0.215953	-0.00439405	-0.270271	-0.285657	-0.0349135	-0.332744	0.0114822	0.174974	0.257721	-0.169659	0.0209937	0.0910954	-0.0858421	-0.00439405	0.113612	-0.00439405	-0.0570135	0.0774631	-0.018702	0	0.0457888	-0.196018	-0.00439405	-0.150103	0.00760199	-0.25509	0.113039	-0.198447	0.137281	-0.196007	0.137583	-0.199685	0.744996	-0.0738173	10598571	4930402K13Rik
0.016665	-0.0169635	0.11125	-0.381527	-0.483247	-0.441094	0.738917	0.318585	0.679932	0.172092	-0.0197473	0.231682	0.148145	0.208558	0.349648	-0.0733147	-0.0752883	0.120968	-0.0243411	-0.30269	-0.217904	-0.394779	-0.285459	-0.509907	0.00323568	-0.55273	0.0732899	-0.434603	0.499706	-0.189941	0.96603	-0.0175078	0.605833	0.197562	10371154	4930404N11Rik
-0.15918	-0.421242	-0.271785	-0.175036	-0.445185	-0.269178	-0.129546	-0.158594	-0.0668404	-0.187693	-0.109869	-0.195997	0.0638275	0.0420341	0.0511372	0.0779128	0.107437	0.156925	-0.079644	0.0536561	-0.258795	-0.275765	-0.19783	-0.304087	0.254464	-0.148845	0.020274	-0.342601	0.0119146	-0.40436	0.205851	-0.19534	0.929354	-0.0310403	10425651;10425653	4930407I10Rik
-0.281173	-0.149392	-0.180391	-0.312715	-0.213411	-0.243126	0.0958009	0.109409	0.0272784	0.0154738	0.107929	-0.0751596	0.00421095	0.126914	0.0730481	0.015048	0	-0.0227456	-0.0466161	-0.0541387	-0.0212054	-0.0683727	-0.112161	-0.29239	0.00111757	-0.276823	0.00604117	-0.298092	0.0425581	-0.227469	0.101846	-0.189381	0.700742	-0.0723933	10398082	4930408O17Rik
-0.272095	-0.306065	-0.198891	-0.0441194	-0.000254	0.217919	0.397943	0.171068	0.832252	0.67866	0.322542	1.57007	0.267727	-0.163393	0.0892444	-0.225336	0.0833588	-0.520154	-0.153545	0.286792	0	0.163107	0.126463	0.351155	0.00407621	-0.762674	0.67658	-0.16511	0.787633	0.120126	0.755056	-0.145	0.54151	-0.314159	10386470	4930412M03Rik
-0.0709319	-0.222118	-0.204828	-0.127733	-0.210095	-0.212629	0.0818698	0.0515959	-0.0187402	0.0568302	0.0191686	-0.0276434	0.00731444	-0.0628235	-0.0992732	-0.152983	-0.0078177	-0.0279977	0.228967	0.17573	0.107166	0.131586	0.0616927	-0.140897	0.111965	-0.201903	0.476138	-0.123128	0.548473	-0.11179	0.129407	-0.345343	0.378854	-0.192183	10469129;10469138	4930412O13Rik
0.0012784	-0.109442	0.00840712	-0.015286	-0.174334	-0.0820484	0.0420527	-0.0936937	0.00840712	0.00881624	-0.155081	0.0217295	0.072515	-0.0502973	-0.078445	-0.0372868	-0.114943	0.123011	-0.0401912	-0.0285144	-0.0534139	0.0795202	-0.0573835	0.0757775	0.79801	-0.0339426	0.82084	-0.0431617	0.796293	-0.0521646	0.93167	-0.0211976	0.734323	-0.0945422	10374327	4930415F15Rik
-0.0344977	-0.0934782	-0.13415	-0.0688195	-0.125342	-0.170662	-0.0372615	0	0.00941849	-0.0224915	-0.0479813	-0.0688195	0.0906854	0	0.20158	0	0.0287166	-0.0603046	-0.0371246	-0.0494008	-0.105743	-0.116325	-0.0677466	-0.0510774	0.149715	-0.0766358	0.00399464	-0.201914	0.2105	-0.0939623	0.653095	-0.0404022	0.86373	-0.0261085	10605648	4930415L06Rik
0.0231857	0.00362635	-0.0960293	-0.0286989	-0.00235033	-0.0987401	-0.00327778	0.132844	-0.0402803	-0.0256772	0.118247	-0.0644212	-0.0178575	-0.0172072	-0.0329185	-0.00746775	-0.00204611	0.0481577	0.0402389	-0.0112042	0.00362635	-0.0331554	-0.0180769	0	0.673476	-0.0527402	0.959467	-0.0105067	0.817947	-0.046049	0.841614	-0.0440547	0.971892	-0.0160903	10426606	4930415O20Rik
-0.287741	-0.00434065	-0.154389	-0.193679	-0.174522	-0.182193	0.0146007	0.144574	0.263562	0.011632	0.0941586	0.169381	-0.112617	-0.0835895	0	-0.121136	-0.10414	-0.0173907	0.162641	0.251457	0.0213437	-0.070261	-0.0386877	-0.101678	0.00256749	-0.282462	0.435764	-0.100742	0.549276	-0.0852552	0.012144	-0.311291	0.618681	-0.0959354	10381502	4930417O22Rik
0.00384808	-0.0125561	-0.0319023	0.0039463	-0.0467501	-0.0524187	-0.0765705	-0.0540638	0.002141	-0.0723472	-0.0831118	-0.0600438	-0.0496602	0.0712271	-0.0322189	0.00587225	0.00918388	0.0060215	-0.00288343	-0.0546308	-0.0478835	-0.0550056	0.00338173	-0.100696	0.658759	0.0346939	0.875193	-0.0190881	0.812914	-0.0296647	0.934627	0.0124938	0.899729	0.0281345	10440338	4930423O20Rik
0.187153	-0.229823	-0.170765	-0.0568223	-0.187757	-0.396895	0.229993	0.318888	0.0620365	-0.0391569	0.00122642	-0.0170965	0.0209885	-0.0707502	0.238159	0	-0.0384951	0.0668731	-0.137311	-0.121644	-0.189752	-0.292224	-0.181407	-0.3	0.0278186	-0.235133	0.148768	-0.205284	0.329886	-0.151944	0.97626	0.00708382	0.601347	0.115392	10454229	4930426D05Rik
-0.174174	-0.202982	0.00191498	-0.285076	-0.223731	-0.132917	0.273997	-0.101969	-0.0168815	0.153449	-0.0277014	-0.0943556	0.0194664	0.0714183	0.0194664	-0.0525904	-0.192633	-0.109211	0.0908947	-0.0693092	-0.00363922	-0.0993505	0.508845	0.236076	0.128579	-0.200584	0.246694	-0.206278	0.823298	-0.0513492	0.385187	-0.175476	0.0400814	-0.384684	10469538	4930426L09Rik
0.188935	-0.028759	-0.123619	-0.09484	-0.244921	-0.253382	0.461645	0.433517	1.6928	0.227665	0.329041	1.44994	0.162519	0.122943	0.050117	-0.127263	-0.0547981	-0.00217533	-0.191021	-0.16352	-0.103823	-0.283941	-0.0994577	-0.145832	1.22e-05	-0.858533	0.417882	-0.204624	0.923595	-0.0313522	0.864419	0.0600239	0.873387	0.0836461	10399011	4930427A07Rik
-0.279006	-0.0570116	-0.0720539	-0.126791	0.0848594	0.078712	-0.302191	0.128072	-0.221123	-0.224215	0.0699854	-0.074276	0.136769	-0.0284653	0	0.148666	0.0164194	0.171791	0.10601	-0.142395	0.11643	-0.171311	-0.207085	-0.0992231	0.69448	0.042076	0.483195	-0.0979833	0.207957	-0.174174	0.582632	-0.0885637	0.644014	0.0973245	10491329	4930429B21Rik
0.073699	0.0140886	-0.0679092	-0.00257826	-0.0421238	-0.0969973	0.0272589	0.0175438	0.0671558	-0.0279083	-0.0276465	-0.0209055	0.0371051	-0.0269733	0.144245	-0.0194087	-0.0469556	0.0992236	0	-0.060935	-0.00261688	-0.0277853	-0.0229263	-0.00848484	0.90703	-0.0262198	0.814331	-0.0717625	0.928666	-0.0312566	0.998431	0.00088048	0.999309	-0.00057133	10485747	4930430A15Rik
0.234441	0.319409	0	0.976934	0.971124	0.48105	0.434511	-1.16142	-0.573074	0.841185	-0.60768	-0.283884	0.413199	-0.534674	0	0.212056	0.581388	0.00171709	-0.00866938	0.0347557	0.0997324	0.461965	-0.0376902	0.627797	0.0201278	0.72222	0.194951	0.537652	0.636967	0.232106	0.330306	0.45522	0.871092	0.146469	10372130	4930430F08Rik
0.0671854	-0.193939	-0.208483	-0.0944791	-0.181175	-0.131845	-0.0172443	0.0821609	0.0951695	0.0528355	-0.0182633	0.0207758	0.0860801	0.111833	0.0444126	-0.106747	0.0063653	-0.0703473	-0.0264602	0.0262928	-0.0334725	-0.173392	0.0581584	-0.123098	0.0151525	-0.159695	0.0172675	-0.204565	0.504445	-0.0668796	0.24073	-0.112576	0.787476	-0.0443454	10532997	4930430O22Rik
-0.174193	-0.120298	-0.134396	-0.288395	-0.365075	-0.337861	0.0649757	0.207691	0.347709	-0.0247345	0.0622912	0.0304103	-0.0244422	-0.0067668	-0.00619316	-0.0440335	0.0173511	-0.0897808	0	0.19392	-0.0794091	0.0317807	0.141638	0.122129	0.0108646	-0.351427	0.223661	-0.224236	0.321299	-0.197882	0.160668	-0.274873	0.10122	-0.335219	10521702	4930431F12Rik
-0.0622668	-0.262605	-0.139994	-0.0356669	-0.111158	-0.045784	0.0893445	0.0815315	0.175128	0.146787	0.156729	0.109352	-0.0555816	-0.164476	0.0646577	-0.103129	-0.0751233	0.0280619	0.143749	0.0232868	0	-0.185463	-0.0895195	-0.210857	0.00377928	-0.236058	0.628452	-0.0577792	0.640544	-0.0595155	0.147875	-0.165258	0.798506	0.0523672	10551754	4930432E11Rik
-0.239172	-0.0855451	0.116771	-0.0452671	0.0168543	0.0198593	-0.0955405	0.075633	0.0329475	-0.0454426	0.157959	0.118364	0.118729	-0.233982	-0.210925	0.13579	-0.386726	9.78e-05	0.248443	0.0209308	-0.165349	-0.518603	-0.141375	-0.105758	0.530161	-0.0767368	0.677731	0.0726427	0.812312	0.0475293	0.725849	-0.0707581	0.244421	0.219162	10535091	4930432F04Rik
-0.314354	-0.274325	-0.148502	-0.0918317	-0.256794	-0.0343399	-0.245677	0.152017	-0.387679	-0.153576	0.112837	-0.148653	-0.0328832	-0.0301356	0.0131717	0	0.0855813	-0.0155344	-0.127953	0.0259562	0	-0.277391	0	-0.088717	0.553904	-0.0749027	0.29294	-0.170075	0.21095	-0.21004	0.404818	-0.152692	0.841391	-0.0646552	10573332	4930432K21Rik
0.000682	-0.14451	-0.0749207	0.00782824	-0.15935	-0.150594	0	0.0502677	0.111144	-0.139528	-0.0373316	0.0357952	-0.0026021	0.0921578	-0.0329213	-0.0455179	-0.0442924	0.0511241	0.0517926	0.00631237	-0.0507312	-0.138886	-0.102251	-0.083878	0.272519	-0.090202	0.341869	-0.105689	0.557125	-0.0739154	0.487002	-0.0892687	0.938355	0.0215275	10495668	4930432M17Rik
-0.00134611	-0.044333	-0.108187	0.0381026	-0.109378	-0.15276	-0.0665812	0.0168939	-0.10727	-0.0514874	0.00410461	-0.0600743	0.0458856	0.0750756	-0.046423	-0.0372953	0.00669289	0.000438	-0.0564137	-0.0589175	0.0630846	0	-0.07091	-0.118127	0.785899	-0.0189145	0.300311	-0.0878297	0.587738	-0.0529288	0.666212	-0.0455681	0.999924	2.87e-05	10590640	4930433N12Rik
-0.261418	-0.246553	-0.302844	-0.390531	-0.197691	-0.266113	-0.186522	0.0336185	-0.0270586	-0.221825	-0.0673652	0.0222053	-0.0343533	0.0375752	0	-0.129473	-0.0854425	0.0382972	-0.195541	-0.181428	0.0118628	-0.154146	-0.00758886	0.0722313	0.0756203	-0.203034	0.0641125	-0.278599	0.173968	-0.218652	0.372372	-0.155823	0.16418	-0.24769	10439509	4930435E12Rik
-0.0517611	-0.0849118	-0.126429	0.007761	-0.11786	-0.147648	1.67885	1.15208	1.95784	1.63401	0.831969	1.62165	0.385222	-0.170139	0.305384	-0.0781121	-0.0564065	0.163838	0.0717611	0.021471	-0.0134411	-0.151886	-0.106433	-0.322828	3.1e-15	-1.56621	0.121176	-0.260297	0.631041	-0.0965814	0.588181	-0.113405	0.715824	0.106907	10376332	4930438A08Rik
-0.140796	-0.0928965	-0.0839639	-0.186906	-0.249907	-0.127099	0.0741596	-0.0233455	0.220463	0.00704336	-0.072022	0.00793314	0.240181	-0.0182743	0.0682826	0.0616798	-0.0444012	0	-0.09482	-0.0449972	-0.0896907	-0.10844	-0.232454	-0.105061	0.0209023	-0.182633	0.0185192	-0.243658	0.16805	-0.152688	0.588781	-0.0704254	0.996039	0.00172353	10464363	4930442E04Rik
-0.0422196	-0.101082	0.0226607	-0.122324	-0.213857	-0.061583	0.212962	0	-0.0926013	0.132548	-0.0709739	-0.125594	0.0939751	0.0856705	-0.0218949	0.0234294	6.29e-05	-0.0586185	0	-0.112095	0.244944	-0.0977821	-0.163534	-0.248142	0.249979	-0.095791	0.207126	-0.138984	0.559766	-0.0746921	0.284467	-0.130684	0.63409	0.0834187	10371080	4930442H23Rik
-0.402707	-0.442365	-0.0129871	-0.397772	-0.462275	0.0778489	-0.533174	-0.0296645	0.0230036	-0.529169	-0.0073781	-0.056303	0.176295	0.0815897	0.388662	0.254463	-0.19466	-0.209251	-0.0750322	-0.111608	-0.169375	-0.051806	0.346805	-0.453755	0.677738	-0.0845952	0.0458323	-0.488892	0.422497	-0.22356	0.619585	-0.154704	0.55161	-0.220457	10368222	4930444G20Rik
-0.103475	-0.364413	-0.291554	-0.0962887	-0.231417	-0.292344	0.0259981	0.183582	0.057703	0.00293446	0.210262	0.0562801	-0.0928912	0.0210004	-0.0476956	-0.0513272	-0.0100751	-0.0469708	-0.0753035	0.0596628	-0.0441151	-0.269643	-0.200594	-0.253931	0.00101501	-0.319375	0.127615	-0.190053	0.139919	-0.193791	0.114313	-0.209997	0.975646	0.0114741	10353258	4930444P10Rik
0.0859599	-0.078444	-0.117037	-0.0494862	-0.206188	-0.217814	0.352604	0.165878	0.30266	0.186878	0.0202007	0.146951	0.0623026	-0.135296	0.0554175	-0.132345	-0.0212092	0.192018	0.0551019	0	0	-0.344226	-0.335878	-0.335877	0.00597607	-0.293031	0.55124	-0.0913098	0.492934	-0.109989	0.490264	-0.115536	0.132643	0.241492	10489589	4930445K14Rik
-0.225854	-0.149785	-0.009058	-0.157772	-0.126769	-0.067915	-0.136021	0	0.018095	-0.121617	-0.0594459	0.10453	0.0756831	-0.0211792	0.317249	-0.035522	-0.0334539	-0.111924	2.11545	1.57962	1.3185	0.00767565	0.100463	0.0756831	0.422814	-0.0904491	0.0840474	-0.246777	0.727839	-0.062559	2.25e-16	-1.79405	0.317957	-0.184133	10423791	4930447A16Rik
-0.0225287	-0.0421014	-0.0330863	-0.0034399	-0.0422606	-0.0516892	0.0362959	0.0590181	0.0028162	0.00996542	0.0579529	0.00572872	0	-0.0671501	-0.0865254	0.0027132	-0.0455904	-0.0067482	-0.0418077	-0.0553069	0.00291061	-0.113306	-0.00324869	-0.059772	0.604223	-0.0611472	0.921517	0.0187075	0.93771	-0.0159759	0.996272	-0.00111636	0.945546	0.0262578	10400948	4930447C04Rik
0.0630155	-0.0484462	-0.0884576	0.0385942	-0.0450149	-0.10995	0.0219107	-0.0935626	0.00475264	0.00153542	-0.072485	-0.011126	0.0194097	-0.0185084	0.0215974	0.00665617	-0.0468693	-0.0116038	-0.0693073	-0.0832987	0.0709534	-0.0642781	-0.0721436	0.0701208	0.923256	-0.0068806	0.669003	-0.0392093	0.894055	-0.0144374	0.973373	-0.0044922	0.96706	-0.00960946	10604864	4930447F04Rik
-0.00864267	-0.142107	-0.169712	-0.000646	-0.0564899	-0.144506	-0.190179	-0.152854	-0.047565	-0.0518408	-0.0101194	-0.0505366	0	0.112514	0.112663	-0.0345964	0.0393429	-0.102969	0.0114446	-0.0201192	0.0991216	-0.102143	-0.00558042	-0.0686154	0.975612	-0.00316817	0.155286	-0.162076	0.697101	-0.0542765	0.369918	-0.117166	0.918892	-0.0282377	10511486	4930448K20Rik
-0.0919485	-0.0516658	-0.106986	-0.16697	-0.153765	-0.159954	0.06074	0.195819	0	-0.0820131	-0.0235333	-0.091054	-0.0288711	0.0125089	0.0481992	-0.0302181	-0.0551491	-0.144446	0.0915418	0.0136004	-0.0890098	-0.13834	-0.0135279	-0.131576	0.0510161	-0.131875	0.14047	-0.132494	0.678937	-0.045277	0.192235	-0.127259	0.894658	-0.0274006	10416911	4930449E01Rik
-0.369237	-0.525964	-0.251713	-0.404806	-0.614055	-0.295249	-0.180217	0.236771	0.109604	-0.171428	0.218509	0.0321903	0.082334	0.0286059	0.110668	-0.0498643	0.00991106	0.0479169	0.0408511	-0.0266795	0	-0.478701	-0.493474	-0.561982	0.000272245	-0.451076	0.00201834	-0.48404	0.00965295	-0.412825	0.00934663	-0.414895	0.710416	0.101215	10521755	4930449I04Rik
-0.265415	-0.234281	-0.363669	-0.0514092	-0.187469	-0.251479	-0.068346	-0.103034	0.0362215	0.0012784	-0.0495906	0.0451365	-0.207622	0.175954	-0.141617	0.261689	-0.0410471	0.244101	0.18071	0.106085	0.426187	-0.0531325	0.112293	-0.0425625	0.0855889	-0.202565	0.296521	-0.167859	0.0172367	-0.380535	0.0036035	-0.463281	0.223992	-0.231153	10409547	4930451E10Rik
0	-0.288325	-0.186482	-0.102983	-0.261092	-0.12582	-0.0671716	0.52357	0.0753078	-0.0819526	0.382786	0.160092	0.091392	-0.160766	-0.129977	-0.0705175	0.126482	0.0144424	0.198392	0.0773287	0.086287	-0.169552	-0.0922804	-0.25287	0.000830674	-0.326222	0.484082	-0.0943333	0.16386	-0.184253	0.0288266	-0.281453	0.97814	0.010784	10433340	4930451G09Rik
-0.12835	-0.434428	-0.0651989	0.0782838	-0.324639	-0.0101943	0.0424643	0.0519848	-0.0169725	0.194949	0.272482	0.119796	0.238912	-0.100075	0.144838	-0.177167	0	-0.135896	0.00906944	-0.0706253	-0.15616	-0.590702	-0.357412	-0.264678	0.0182374	-0.258205	0.0926416	-0.24198	0.820788	-0.0430671	0.690152	-0.0748491	0.119004	0.256843	10568060	4930451I11Rik
-0.127994	-0.113086	-0.107578	-0.104414	-0.0989156	-0.138544	-0.0196757	0.0654459	-0.0162787	-0.0640364	-0.0209484	-0.0131898	-0.0023365	-0.0771971	0.0464616	0	-0.0761528	0.0288329	0.324108	0.344876	0.32811	0.143068	0.167374	-0.0920095	0.0395704	-0.103642	0.119047	-0.104065	0.159896	-0.0993154	6.49e-09	-0.447453	0.00659663	-0.1879	10417579	4930452B06Rik
-0.459067	-0.149521	0.0251598	0.144789	0.526137	0.560733	-0.578913	-0.513465	-0.744779	-0.0137582	0.201328	0.0137577	-0.879189	-0.461186	-0.894174	0.110848	0.00271416	-0.20321	0.196178	0.268191	0.573065	0.591643	0.523074	0.671948	0.174943	0.380677	0.0198994	0.852888	0.770218	0.137921	0.609042	-0.237773	0.300065	-0.487517	10440284	4930453N24Rik
-0.118877	0.0152206	-0.1522	-0.142088	-0.116057	-0.142836	0.716573	1.61031	0.954493	0.375831	1.54718	0.799637	-0.0393152	-0.0457759	0	0.0635891	-0.115839	-0.0633969	0.0395756	-0.0818276	-0.0736885	-0.0766921	-0.20999	0.0116715	1.87e-09	-1.11014	0.725394	-0.0811091	0.779359	-0.0709237	0.796973	-0.070826	0.976857	-0.0178025	10365339	4930463O16Rik
-0.0464945	-0.125268	-0.114716	-0.114489	-0.0287628	-0.163774	0.0431829	0.123993	0.000901	0.070199	0.0944986	-0.0825167	0.0590343	0	0.0218382	-0.0416904	-0.0977941	0.142471	-0.00158978	0.0202022	0.12202	-0.151378	-0.118471	-0.0797486	0.139108	-0.140627	0.333871	-0.125875	0.488564	-0.099913	0.303987	-0.145795	0.960203	0.0176149	10456889	4930465K10Rik
1.19282	1.48406	0.888821	1.00389	1.6502	0.996355	-0.0208788	-0.138888	-0.1055	-0.135469	-0.114967	-0.057333	0.0367994	-0.284571	1.19996	0.878468	-0.00294423	1.22181	-0.153074	-0.170432	-0.131404	-0.213094	-0.242803	-0.230147	0.000303777	1.2982	0.0492563	0.885296	0.312606	0.503578	0.00341669	1.35433	0.00215989	1.43137	10512332;10512354	4930466F19Rik
-0.0623789	0	-0.134628	-0.0725074	-0.0634279	-0.144875	0.139253	0.0236816	0.0208321	0.042171	-0.0322328	-0.0506864	-0.0328617	-0.0116057	0.133177	-0.00713825	0.0206394	-0.00210905	0.00299883	-0.0865698	-0.137603	-0.0760908	-0.0469408	-0.122643	0.0860889	-0.103473	0.175574	-0.109206	0.344815	-0.0834335	0.965009	-0.00591135	0.99272	0.00225544	10359419	4930469G21Rik
-0.0260477	0.0116687	-0.0873122	-0.0850325	-0.0625143	-0.180407	0.260247	0	0.132162	0.0671496	-0.0674381	0.0205507	0.0784497	0.0278554	0.00379324	-0.00384474	-0.054635	0.14647	-0.0329862	-0.0262947	-0.0202451	-0.0469093	-0.0553503	-0.0402656	0.0153808	-0.140386	0.158842	-0.108307	0.217035	-0.100938	0.643739	-0.0450989	0.890618	-0.0240991	10447546	4930470H14Rik
-0.110651	-0.119588	-0.0740051	-0.114302	-0.128137	-0.130708	-0.0731344	-0.0563951	0.0615663	-0.113077	-0.0586467	0.075963	0.067523	0.026576	0.0325213	-0.0508523	0.0238485	0.242445	0	-0.00292683	-0.0821962	-0.161427	-0.112914	-0.166666	0.219195	-0.0856113	0.0887319	-0.155105	0.0501176	-0.184712	0.432694	-0.0845243	0.86304	0.0341037	10490094	4930470P17Rik
-0.189365	-0.212684	-0.0828023	-0.219245	-0.230404	-0.0241509	-0.0302954	-0.040041	-0.0482998	-0.0481534	0.129377	-0.191914	-0.0188303	-0.0357366	0	0.0481591	0.0481591	0.0811295	-0.00624847	-0.0194426	-0.109359	-0.232017	0.0481591	-0.16487	0.166491	-0.121554	0.229072	-0.141586	0.0678194	-0.218924	0.393817	-0.114758	0.860605	-0.0435325	10454873	4930471G03Rik
0	-0.02281	-0.0262003	0.11913	0.0507569	-0.090518	-0.151959	-0.0377159	0.00230217	-0.0143614	-0.0218639	0.0236573	-0.236983	-0.061511	-0.138324	-0.068018	0.0617204	-0.24285	0.00844574	-0.0704331	0.0503235	0.131654	0.0144277	0.419878	0.706436	0.0383832	0.226784	0.150666	0.538312	0.0881089	0.965538	0.00894769	0.217011	-0.183593	10487675	4930473A02Rik
-0.207855	-0.0643015	-0.178673	-0.298573	-0.196673	-0.228554	0.0787177	0.0520287	-0.0199151	0.180206	0.0949841	-0.20129	-0.00579739	0.086761	0.0616455	0.0206776	0	-0.0193715	0.03121	-0.0234818	-0.0807342	-0.177498	-0.0264311	-0.17881	0.0139122	-0.22656	0.0429969	-0.243308	0.123702	-0.196207	0.1954	-0.171436	0.758218	-0.0681918	10447946	4930474M22Rik
-0.0238991	-0.153752	0.00877571	-0.103928	-0.345819	-0.0591512	-0.0567112	0.143187	0.234572	-0.145669	-0.0132098	-0.0281939	0.120264	-0.112058	0.147751	-0.0145698	0.119515	-0.0752563	-0.234713	0	-0.0338292	-0.194073	-0.0751214	-0.175355	0.186863	-0.135291	0.229374	-0.164948	0.418776	-0.122859	0.909841	-0.0234482	0.913625	0.035221	10414156	4930474N05Rik
-0.0428801	-0.043705	-0.060679	-0.0834293	-0.101692	-0.187791	0.0565805	0.138728	0.333981	-0.0346632	0.046308	0.203482	0.00884104	-0.0376697	0.00884104	-0.00340748	-0.0145516	0.14179	-0.00532198	-0.0716171	0	-0.0737639	-0.0896845	0.00902462	0.00227368	-0.210766	0.395876	-0.0800335	0.177539	-0.127973	0.58299	-0.0610497	0.85213	-0.0352215	10600581	4930480E11Rik
0.149055	-0.114949	0	-0.0166106	-0.177781	-0.0248117	-0.00592518	0.0911589	-0.118933	-0.0227847	-0.0732326	-0.0974507	-0.0752125	-0.0033741	-0.131752	-0.0615659	-0.140708	0.0177708	0.0127735	-0.0694962	0.0468698	-0.285081	-0.174333	-0.213245	0.961207	0.00701165	0.841203	0.0392633	0.885937	0.0306515	0.909754	-0.0275652	0.35326	0.19337	10425503	4930483J18Rik
0.223266	0.281044	0	0.968337	1.2959	1.01912	-1.55276	-1.29281	-1.00869	-0.442309	-0.268657	-0.0620699	-0.0022049	1.10706	0.798799	0.166202	-0.0101528	0.837464	-0.17247	0.286651	0.723698	-1.02193	-1.06791	-0.397106	3.93e-05	1.40249	0.995955	-0.00327403	0.541212	0.300106	0.484496	0.351985	0.00072824	1.46026	10409857	4930486L24Rik
0	-0.147416	-0.113242	-0.0838013	-0.141512	-0.212609	-0.043129	0.0856895	0.307378	-0.118143	0.0233917	0.0584836	-0.100044	0	0	-0.0233221	0.0958219	0.0508547	0.0745153	-0.151159	0.087759	-0.143116	-0.11838	-0.157199	0.00741115	-0.168708	0.33175	-0.083082	0.0652281	-0.157548	0.180217	-0.120135	0.905659	0.0231349	10599663	4930502E18Rik
-0.00797415	-0.0446358	-0.122734	-0.0665231	-0.152673	-0.157294	0.295937	-0.00359201	0.1583	0.184781	0.00193262	0.0142136	0.640863	-0.014183	0.2508	-0.0946522	0.0526886	0.0298462	0.0111213	-0.108491	0.0404124	-0.287551	-0.176178	-0.18736	0.0256809	-0.200568	0.00131182	-0.384466	0.52495	-0.0879334	0.627756	-0.0729869	0.453602	0.125057	10502725	4930503B20Rik
-0.130295	-0.0746326	-0.021699	-0.17502	-0.0993733	-0.0622134	0.0104785	0.153979	0.0140729	-0.0128407	0.057991	0.0245328	0.070858	-0.0116735	0.106607	0.0678148	0.0812211	0.0687747	-0.00845575	0	0.0202923	-0.0191565	0.004426	-0.0486093	0.00898993	-0.135241	0.0266059	-0.149136	0.0165658	-0.166476	0.185607	-0.0978178	0.441923	-0.0727591	10366735	4930503E24Rik
-0.0476756	-0.0835681	-0.0683556	-0.0539479	-0.200976	-0.146841	0.0937247	0.0251875	0.0759039	0.0105233	-0.0710397	-0.000916	0.0251265	0	0.0549235	-0.0786457	0.00164032	-0.0628695	0.00165272	-0.0571275	-0.0588021	-0.0402532	-0.0447373	-0.0549436	0.00675437	-0.122458	0.0303703	-0.126911	0.422388	-0.0536025	0.360985	-0.0621351	0.543307	-0.0535827	10602749	4930503H13Rik
-0.368597	-0.463962	-0.620704	-0.00864649	0.00864696	-0.244309	-1.61151	-1.72519	-1.43282	-0.911694	-1.17493	-0.980429	-1.16956	-0.486108	-0.472334	0.313435	0.0875673	-0.0453472	0.586925	0.635239	0.610013	0.640979	0.795757	0.79092	0.000123645	1.02317	0.206098	0.426405	0.266468	-0.40148	0.00857261	-0.893654	0.00276571	-1.02548	10459643	4930503L19Rik
-0.05265	-0.177279	-0.0285077	-0.114701	-0.232598	-0.024127	-0.0761609	-0.0568623	-0.075913	-0.0719957	-0.0803399	-0.123006	0.0556989	-0.0603252	0.125781	0.0275021	0.10181	0	0.162838	-0.0692573	0.0911555	-0.347116	-0.0286579	-0.24232	0.829857	-0.0242643	0.281968	-0.145362	0.304954	-0.148081	0.255279	-0.166556	0.633726	0.101054	10386173	4930504O13Rik
-0.0777869	-0.0127811	-0.0528278	-0.0951047	-0.0352736	-0.127529	0.0962858	-0.0246158	-0.0136113	-0.0116367	-0.032783	-0.116575	0.053968	-0.0397458	0.0119615	-0.0961523	-0.0535679	0.095809	0.0694489	0.00360298	0.135112	0	-0.0879574	0.00396729	0.646112	-0.0497278	0.607523	-0.0756117	0.771443	-0.0489135	0.369986	-0.136272	0.899468	-0.0388872	10384930	4930505A04Rik
-0.0429172	-0.367079	-0.147575	-0.0669894	-0.320424	-0.156792	0.0249715	0	0.137728	-0.0523	-0.112506	0.0619087	-0.0638251	0.0922198	-0.00107288	0.114165	-0.065629	0.140727	-0.160569	-0.00610018	-0.301401	0.00107431	-0.137917	-0.115612	0.0724533	-0.193596	0.18139	-0.192737	0.0977306	-0.246717	0.898681	-0.0276062	0.680227	-0.0994779	10463513	4930505N22Rik
-0.423817	0	-0.201856	-0.202236	-0.0574651	-0.249597	-0.219921	0.28422	0.284052	-0.0574651	-0.0756636	0.130107	-0.120659	0.0769682	0.0393095	0.190042	-0.163911	0.304984	0.0251107	0.104049	0.0795302	-0.0300612	-0.12715	-0.00442219	0.126839	-0.246717	0.406033	-0.187701	0.187925	-0.299533	0.279902	-0.258725	0.717705	-0.135284	10579913	4930505O20Rik
0.0101666	-0.274664	-0.112558	0.21269	-0.251877	0.102738	0	-0.280974	0.22862	0.102249	-0.0928788	0.380269	0.0839009	-0.582207	0.50138	0.534458	0.15421	0.0100098	0.149854	-0.084559	-0.149485	0.643669	-0.237346	0.174486	0.575338	-0.108465	0.859505	-0.0532755	0.273738	-0.285143	0.950582	-0.0241876	0.469462	-0.245854	10447688	4930506C21Rik
0.0343475	0.219973	0.322634	0.00211859	0.113417	0.249013	-0.0914993	0.103515	0.585205	-0.187655	0.0529361	0.410666	-0.168827	-0.0768671	-0.0474882	-0.0579929	0.0887303	0.0916247	0.0142551	0.114783	-0.194193	-0.152193	-0.0341086	-0.0706201	0.936318	0.0113892	0.109783	0.254645	0.53175	0.11613	0.324498	0.178635	0.207274	0.242558	10363557	4930507D05Rik
-0.051621	0	-0.0508633	-0.0379095	0.00360346	-0.123299	-0.135266	0.108208	0.229609	-0.171985	-5.63e-05	0.0746121	-0.020268	0.120252	0.0145073	-0.01544	-0.0819726	0.0139074	0.00222158	-0.0103049	0.0589271	-0.143193	-0.0922427	-0.316862	0.419591	-0.0608683	0.423422	-0.081512	0.905279	-0.0155131	0.617872	-0.0602961	0.229319	0.140751	10585328	4930510E17Rik
-0.235658	-0.0972557	-0.275487	-0.217485	-0.131095	-0.247637	-0.0374346	0.0929561	0.277596	-0.0843406	0.0244169	0.276285	-0.129082	0.022068	0	-0.0162663	-0.0623789	0.00852346	-0.0531626	0.0123987	-0.0356555	-0.0739965	-0.145225	-0.389225	0.000896755	-0.292349	0.144911	-0.165098	0.134888	-0.177396	0.148639	-0.175296	0.99567	0.00204603	10499876	4930511M18Rik;Lelp1
0.104928	-0.210393	-0.0371289	-0.00451183	-0.216693	-0.0884795	-0.0112939	0.15214	0.197085	-0.0802622	0.0538611	0.144507	0.128688	0.0199547	0.0881643	-0.12409	0	0.0348821	0.0847139	-0.040493	0.0931115	-0.10347	-0.118093	-0.0993133	0.139675	-0.151386	0.265483	-0.154315	0.794548	-0.0456436	0.450795	-0.121157	0.924964	0.0315793	10396121	4930512B01Rik
-0.049582	-0.00863552	0.00777531	-0.328288	-0.0419788	-0.136195	-0.0477996	-0.00518322	0.230146	-0.146341	-0.108716	0.000494	-0.0889687	0.220967	0.0411758	-0.199916	-0.0833526	-0.200088	-0.155292	0.044754	-0.124415	-0.174041	-0.122319	-0.177214	0.395513	-0.0799172	0.216752	-0.150542	0.635063	0.0683016	0.940542	-0.0144993	0.770308	0.0650407	10384365	4930512M02Rik
0.0318522	-0.39562	0.00642777	-0.0268216	-0.320184	-0.0480642	-0.0902395	0.394881	0.106498	-0.0665708	0.333476	0.253898	-0.183403	-0.0715103	0	-0.0711308	0.212511	-0.069808	-0.0424337	0.12524	-0.127593	-0.14669	-0.102972	-0.230963	0.0163016	-0.280725	0.831166	-0.0404305	0.384724	-0.149259	0.561026	-0.110473	0.928143	0.034807	10574410	4930513N10Rik
-0.0461164	-0.0556803	-0.00887871	-0.101154	-0.114461	-0.0395608	-0.0267539	0.0542803	-0.0527425	-0.0978055	-0.0104346	-0.0647383	0	-0.000953	0.0354047	0.0613093	0.0260243	0.0178375	-0.0872011	-0.051456	0.0380526	-0.00605011	-0.0399532	-0.0559979	0.589498	-0.0279427	0.267947	-0.072459	0.155178	-0.0960322	0.748326	-0.0274403	0.836455	-0.0269748	10601973	4930513O06Rik
0.0648608	0.40503	0.00328398	-0.207853	0.038959	-0.144076	0.720735	0.468665	0.22634	0.344481	0.132352	-0.0222626	-0.179005	-0.0107932	-0.00871849	-0.22478	0.182586	0.277927	-0.0276151	0	-0.161333	-0.317949	-0.187132	-0.166154	0.032809	-0.285018	0.641867	0.0928729	0.824088	-0.0518768	0.697762	0.0896835	0.25255	0.250446	10532888	4930515G01Rik
0.0774384	-0.0773666	-0.0717149	-0.000624895	-0.0939588	-0.104011	0.118605	-0.00323772	0.14971	-0.0225303	-0.00625157	0.0558498	0.0344391	-0.0846524	0.0672607	0.0405421	-0.0601356	-0.0284934	-0.0550034	-0.069886	-0.0192404	-0.0424082	-0.0430372	-0.0712786	0.36632	-0.0937303	0.68887	-0.050722	0.86661	-0.0290106	0.978448	0.00300368	0.840065	0.00720175	10442256;10448184	4930515G13Rik
-0.736425	-0.850625	-0.824071	-0.267087	-0.259606	-0.321452	-0.691639	-0.786203	-0.216426	-0.249096	-0.214977	0.0115914	0.312606	1.28799	-0.616008	0.317839	1.37134	0.113817	-0.0576048	-0.0139036	-0.306086	0.47318	1.14168	0.624886	0.519996	-0.185419	0.0149287	-0.871406	0.00187501	-1.14421	0.306277	-0.417346	0.000524286	-1.28979	10416785	4930517O19Rik
-0.119967	0	0.161022	-0.17518	0.0587044	0.0709124	0.0540171	-0.275826	0.335088	0.00845432	-0.140459	0.234459	-0.223635	-0.200364	-0.0201406	-0.0804343	-0.368201	0.264419	0.117425	-0.303371	0.245879	-0.130371	-0.111913	0.0212974	0.868739	-0.036707	0.60419	0.147295	0.858652	0.0606542	0.960925	-0.0207289	0.903892	0.0729106	10570955	4930518F22Rik
-0.511405	-0.457748	-0.351223	0.251361	0.368078	0.496011	-0.383881	0.811603	-0.269802	0.716257	1.74191	0.580943	-0.510266	-1.95646	0.364965	0.131184	-0.438215	-0.0651226	0.895721	0.307009	0.145907	0.55688	0.644393	0.918214	0.135741	-0.566992	0.189079	0.666432	0.894199	0.0898969	0.41041	-0.4837	0.226237	-0.74065	10489053	4930518I15Rik
-0.135366	-0.187384	-0.0492268	-0.191756	-0.2117	-0.205655	0.0640554	0.104329	0.236298	-0.0946183	-0.00114775	-0.0466299	0.101162	0.145435	-0.00830746	0.0502567	0.0153551	0.126639	-0.0536594	-0.0884728	0.225419	0.0318279	-0.04527	-0.231513	0.0141544	-0.207229	0.0274664	-0.242944	0.0470177	-0.227598	0.106068	-0.191277	0.654243	-0.0818632	10368475	4930519F09Rik
-0.0246325	-0.0277691	-0.09479	-0.0348072	-0.0745535	-0.0402679	-0.0286994	0.0511265	-0.0142999	-0.0351648	0.0354505	0.016551	0.0121064	0	0.0198784	0.0165987	-0.0380812	-0.0113616	0.0337367	0.0638413	0.134378	-0.07869	-0.098237	-0.0396938	0.191986	-0.0536307	0.278447	-0.0601316	0.542341	-0.038522	0.0225825	-0.126789	0.836949	0.0227369	10606163	4930519F16Rik
-0.060463	-0.100808	-0.0929255	-0.235137	-0.257142	-0.228096	0.0649128	0.39968	0.124901	-0.112317	0.037313	-0.0037117	0	0.00765657	0.0468116	-0.104294	-0.124533	0.040257	-0.0593996	-0.0473366	-0.0748849	-0.198794	-0.187646	-0.125448	0.0024309	-0.247558	0.0864966	-0.180584	0.400506	-0.0995717	0.410201	-0.101888	0.979816	0.00820128	10524606	4930519G04Rik
-0.105084	0.133239	-0.208543	-0.0747051	0.168231	-0.200703	0.211536	0.0594211	0.258188	0.0466971	0.0213141	0.131361	0.0051074	0.0899129	-0.144233	-0.0699644	-0.0738592	-0.0749278	0	-0.0828652	-0.0865054	-0.0549288	-0.0211844	0.0205569	0.0309728	-0.169347	0.801655	-0.0315235	0.857039	0.0249895	0.96057	0.00852927	0.905194	-0.0294089	10488802	4930519P11Rik
-0.197135	-0.141821	0.139324	-0.119656	-0.0720272	0.279588	0.0288348	0.247835	0.332269	-0.000546	0.222079	0.299886	0.321164	0.215799	0.283014	-0.00507546	0	0.617215	-0.0508003	-0.0489054	-0.207141	-0.14968	-0.158768	-0.234545	0.156067	-0.207014	0.130185	-0.291947	0.289825	-0.222668	0.745644	0.0836612	0.585104	0.162376	10589886	4930520O04Rik
-0.126205	-0.0372067	-0.16692	-0.0302563	-0.0307603	-0.13004	0	0.0175919	0.0974488	0.0341625	0.00272608	0.0369163	0.0487304	0.110088	0.0238099	-0.0296321	-0.0218983	0.0547047	0.0573912	-0.0766091	-0.00144148	-0.0418448	-0.211065	-0.0784163	0.366691	-0.118372	0.406371	-0.147774	0.667552	-0.0879562	0.717563	-0.0800116	0.960203	0.0235441	10515080	4930522H14Rik
-0.450242	-0.166616	-0.00403929	-0.0592861	0.269613	0.483939	-0.588812	-0.266785	-0.557749	-0.237762	0.106922	-0.142386	-0.254324	-0.05445	0.237502	0.569172	0.461395	0.495842	0.534557	0.439762	0.239859	0.115773	0.198346	0.0747132	0.30623	0.293324	0.941682	0.0359857	0.211145	-0.496575	0.357436	-0.392498	0.889501	-0.117383	10532305;10532310	4930522L14Rik;Zfp950;A630089N07Rik;Arid4b;Zfp932
-0.140109	-0.0999646	-0.0793543	-0.0807347	-0.0911861	-0.0428047	0.194778	0.176889	0.00208664	0.122779	0.0739331	-0.0345144	0.301956	-0.136148	0.0477982	-0.0344391	0.0596933	-0.00465536	0.162502	0.00833273	-0.136895	-0.0498133	-0.129356	-0.112432	0.168018	-0.178351	0.368765	-0.160228	0.639379	-0.095892	0.645062	-0.100339	0.987398	0.00817489	10523513	4930522N08Rik
-1.22209	-1.37971	-0.99478	-0.30388	-0.319761	-0.204859	-0.171743	0.991736	0.259244	0.518467	2.06181	0.95527	0.13535	0	-0.0317354	-0.0636659	0.117594	-0.154275	0.19358	0.0945721	0.572358	-0.142789	-0.07232	-0.0508909	1.57e-06	-1.50664	0.0354424	-0.772052	0.0666711	-0.704065	0.00676935	-1.02435	0.127695	-0.648847	10350977	4930523C07Rik
-0.035212	0	0.0337343	-0.112619	-0.054678	-0.0815954	-0.0202351	0.180673	-0.0392036	-0.116848	0.0518827	-0.0116735	0.0654745	0.053885	0.169552	-0.00771475	-0.0960169	0.0123196	0	-0.0769343	0.118893	-0.259594	-0.186201	-0.222331	0.526803	-0.049161	0.158015	-0.138032	0.934426	-0.0112576	0.65409	-0.0557146	0.0974693	0.180981	10375014	4930524B15Rik
0.320261	0	0.70753	0.0884676	-0.275066	0.449434	1.48781	1.05906	-0.19103	1.34524	0.649045	-0.505476	-0.202139	-0.172578	0.607464	0.183355	-0.555956	0.719462	-0.0199037	-0.079597	0.0285416	-0.179114	0.0737438	0.107052	0.238748	-0.425671	0.810214	0.137522	0.875471	0.0994841	0.698774	0.238757	0.819646	0.214543	10523516	4930524J08Rik
0.247153	-0.0528326	0.162068	0.181444	-0.164449	0.00993824	0.0687532	0.191995	0.105701	0.0620542	0.121443	0.0129967	0.0408983	-0.0246448	0.0391336	-0.0699162	-0.0149541	-0.0372734	0.04707	-0.0666895	0.24359	-0.149777	-0.100423	0.0062418	0.733131	-0.0299369	0.710182	0.0454246	0.36991	0.104602	0.949664	-0.01077	0.267441	0.145206	10607421	4930524N10Rik
0.0537181	-0.00554275	0	-0.051033	-0.0847297	-0.0889325	-0.0230026	0.0609126	-0.213735	-0.176705	-0.0162392	-0.224093	-0.29102	-0.130032	-0.198981	-0.219922	-0.0260334	-0.00119114	0.332429	0.249214	0.0225296	0.237308	0.257787	0.118579	0.529434	0.0693904	0.204332	0.177258	0.762781	0.0529624	0.117006	-0.230811	0.143569	-0.233978	10549582	4930526A20Rik;Tsen34
-0.0811949	-0.203507	-0.0892825	-0.287201	-0.382989	-0.249359	0.139111	0.285886	0.196676	-0.165898	0.137344	0.00136852	0.057467	0.118703	0.113884	-0.0986175	-0.00343847	0.138444	0.0497909	0.0345168	0.0236072	-0.390964	-0.127228	-0.228734	0.00700557	-0.31467	0.0391463	-0.312274	0.159235	-0.227718	0.123859	-0.251561	0.93128	0.0333862	10360540	4930527J03Rik
-0.120924	-0.0551968	-0.0595779	-0.0157113	-0.0614548	-0.0807471	0.0678368	-0.00589085	0.233117	0.0713963	-0.117984	0.17997	0.347944	0.0356541	0.0356541	-0.0154424	-0.0314317	-0.0405869	0.368139	0.152885	0.108896	-0.138203	-0.019752	-0.0731711	0.147923	-0.137009	0.0996028	-0.205353	0.825582	-0.0364483	0.0328257	-0.275575	0.975959	0.01144	10511808	4930528A17Rik
-0.11216	-0.236687	-0.146851	-0.11401	-0.243044	-0.0773544	-0.430062	-0.20659	0.0238724	-0.210258	-0.164812	0.0497146	0.0860863	-0.0309286	0	-0.317072	-0.0991521	0.0388317	-0.022686	-0.0688181	-0.0537724	0.367178	0.169726	0.0572515	0.990049	0.00133817	0.139008	-0.173404	0.851417	-0.0292203	0.440058	-0.106592	0.0033263	-0.35307	10363887	4930533K18Rik
-0.19222	-0.301521	-0.133388	-0.225228	-0.1987	-0.191117	0.0738711	0	-0.0462775	-0.00628614	0.0952601	-0.108809	0.0760808	0	0.0976782	-0.239086	-0.0537062	-0.0168366	0.104012	0.00154829	-0.0165939	-0.240686	-0.160138	-0.177236	0.0020906	-0.208322	0.0024928	-0.264949	0.275446	-0.103819	0.00805562	-0.236685	0.953119	-0.0143424	10557313	4930533L02Rik
-0.0430756	-0.168833	0.0550213	-0.218103	-0.372578	-0.155838	0.0125408	0.231352	0.15566	0.0379834	0.0637555	0.0746355	-0.0881248	0.00933504	0.0818176	-0.0880852	0.203928	0.341963	-0.0441852	-0.0157776	0.0682998	-0.528317	-0.366181	-0.185411	0.0745118	-0.246556	0.437556	-0.151577	0.114337	-0.30317	0.485215	-0.153347	0.398487	0.209402	10516225	4930535I16Rik
-0.175545	-0.145211	0.0571814	-0.0286541	0.00124931	0.222834	0.125992	-0.24601	0	0.0948539	-0.128553	0.00967836	-0.0592155	-0.132613	-0.242478	-0.11963	-0.049828	-0.207005	0.275103	0.0525932	-0.110646	0.101259	-0.136123	0.157477	0.932748	0.0126488	0.457144	0.133411	0.562955	0.11413	0.701806	-0.0837077	0.891802	-0.0522286	10515861	4930538K18Rik
-0.103273	-0.198761	-0.0301299	-0.177441	-0.436582	-0.213136	0.0560517	0.268231	0.237426	-0.048625	-0.0704341	0.0267987	0.0793185	-0.0116348	0.172463	-0.0234089	-0.0447659	0.071733	0.0214992	-0.0498738	-0.000272	-0.134624	-0.277684	-0.302236	0.00227203	-0.271462	0.0165702	-0.273269	0.105866	-0.194407	0.136896	-0.183672	0.853758	0.0449607	10449510	4930539E08Rik
-0.105718	-0.283763	-0.249274	-0.249389	-0.34988	-0.41122	0.00578499	0.244094	0.138896	-0.224261	0.0653377	-0.13675	-0.0803356	0.0525403	0.10866	0	-0.0467596	0.145467	-0.151016	-0.0208645	-0.0317311	-0.327732	-0.294209	-0.319032	0.0211039	-0.290391	0.0679639	-0.301829	0.0744932	-0.307777	0.264841	-0.207003	0.924964	0.0387838	10595169	4930542C12Rik
0.0144043	-0.21539	0.000812	-0.169981	-0.136839	0.00223875	-0.262492	0.0971107	0.00897169	-0.0970116	0.0752511	-0.153373	-0.0701113	0	-0.143954	-0.220121	0.164369	-0.188009	0.107152	0.0840645	-0.193785	-0.0527725	-0.102689	-0.229797	0.836032	-0.0288686	0.953364	-0.0127706	0.990562	-0.00287208	0.693619	-0.0832697	0.909089	0.0442936	10418164	4930542C16Rik
0.216121	-0.102358	-0.0498171	0.0517173	-0.166602	-0.171995	-0.110853	0.119926	0.14487	-0.123624	0.0449748	-0.00221348	-0.0637598	0.0422516	0.115596	0.0500898	-0.0180445	0.0779996	-0.0751319	-0.020607	-0.0802569	-0.0624652	-0.12368	-0.118236	0.77905	-0.0493356	0.783248	-0.0685181	0.782305	-0.0738372	0.949315	0.0215097	0.893102	0.0643047	10538829	4930544G11Rik
-0.0310168	-0.092289	-0.083303	-0.0105739	-0.0832295	-0.0256228	0	0.0508466	0.0234857	0.0010047	0.00320292	0.0148702	0.0555973	-0.030859	0.0603042	-0.017694	-0.0947924	0.0247092	-0.021451	-0.0708962	-0.0197616	-0.11322	-0.128935	-0.308219	0.24973	-0.0699075	0.313052	-0.0826867	0.808931	-0.0250801	0.886758	-0.0169696	0.167056	0.129119	10558403	4930544L04Rik
-0.251968	-0.238704	-0.0925465	-0.15593	-0.19532	-0.0129204	-0.0271587	0.0364265	-0.109763	0.0104046	0.162819	-0.110509	0.154748	0.1164	0.171302	-0.00826073	0.114765	0.0342741	0.133502	-0.00965548	0.0298371	-0.0979104	-0.153086	-0.186468	0.0209921	-0.151602	0.000509201	-0.305381	0.0211853	-0.204824	0.0189182	-0.209126	0.960425	-0.012077	10407300	4930544M13Rik
-0.301011	-0.269059	-0.224194	-0.177649	-0.26563	-0.206657	-0.0655527	0.271702	0.116568	-0.0263619	0.370325	0.0740404	0	-0.115191	0.068048	-0.0491142	0.0811787	-0.0776854	-0.0590553	-0.0416417	0.115785	-0.360098	-0.265713	-0.173559	0.000194484	-0.364153	0.0651471	-0.224986	0.0767999	-0.225493	0.0549121	-0.245729	0.934739	0.0257567	10459614	4930546C10Rik
-0.283142	-0.335493	-0.23639	-0.176987	-0.179394	-0.111789	-0.180987	0.180264	0.0578528	-0.0248237	0.281308	0.267657	0.13007	-0.132827	0.0239744	0	-0.0304709	0.1243	0.104972	0.0865354	0.00676918	-0.383532	-0.203829	-0.352366	0.00156559	-0.317411	0.0769517	-0.227605	0.059867	-0.251809	0.0318186	-0.286625	0.66669	0.0927098	10362669	4930547M16Rik
-0.0463729	-0.00932264	-0.0997906	-0.00845814	0.0136671	-0.064857	0.0586972	0	0.0289879	0.0245338	0.00785828	0.0217533	-0.11692	-0.0231161	-0.0619373	0.0188422	0	-0.0539513	-0.0197167	-0.0279889	0.121499	-0.0523944	0.0486097	0.00193977	0.236417	-0.0594941	0.67578	0.0314688	0.773576	-0.0241527	0.435972	-0.0604533	0.773839	-0.0352407	10424064	4930548G14Rik
-0.153769	-0.140637	-0.158697	-0.143901	-0.103374	-0.152262	-0.0726943	0.0570192	0.0580802	-0.115598	0.14159	-0.0636978	0.109551	0.0428724	0.0298748	-0.0168991	-0.0473185	0.124463	-0.0435643	0.1525	-0.0380301	-0.186117	-0.303685	0.212692	0.202545	-0.14289	0.172379	-0.202873	0.317109	-0.162189	0.322741	-0.165742	0.879543	-0.0497368	10520796	4930548H24Rik
-0.131794	-0.404409	-0.0251284	-0.0802135	-0.386591	-0.071003	-0.253009	-0.0699725	-0.13957	-0.153996	-0.0465221	0.0696473	0.00705099	0.2549	0.0266223	-0.145575	-0.0425673	-0.101444	0.252882	0.0900183	0.0659194	0	-0.218241	-0.138952	0.446753	-0.0842861	0.0441595	-0.279381	0.60325	-0.0866611	0.0268717	-0.319463	0.81755	-0.0641253	10509253	4930549C01Rik
-0.33939	-0.183145	0.227725	-0.0150261	0.128895	0.339534	-0.363137	-0.389523	-0.44075	-0.0602913	-0.0143652	-0.155268	0.157327	-0.468196	-0.122159	1.30431	0.402185	0.953196	-0.0874434	-0.25675	-0.138039	0.540691	0.123055	0.427526	0.220133	0.263654	0.586235	0.170774	0.00278111	-0.860133	0.595983	0.187176	0.367734	-0.337325	10585347	4930550C14Rik
-0.0106687	0.227042	-0.0226812	-0.127842	0.033011	-0.033195	0	0.12909	0.131616	0.0271144	-0.00196362	0.0248504	-0.0872679	-0.0388126	-0.0638037	0.0041132	-0.126339	0.0841074	-0.0240703	-0.0471921	0.108313	-0.00979948	-0.0515833	-0.0679069	0.509476	-0.0408403	0.359181	0.0742389	0.816641	0.0236505	0.991027	-0.00140588	0.680364	0.0540407	10599822	4930550L24Rik
-0.137715	-0.410829	-0.238091	-0.0848732	-0.40933	-0.193015	-0.0614848	0.00201178	-0.123799	0.0803289	0.0127668	-0.14007	-0.041121	0	0.234335	-0.21723	-0.116945	0.0309544	0.148271	0.0473318	-0.136856	-0.172261	-0.0966206	-0.244127	0.0150697	-0.207268	0.00562071	-0.310047	0.231408	-0.144568	0.0216046	-0.265225	0.700742	-0.0746391	10514333	4930553M12Rik
-0.110533	-0.157454	-0.204823	-0.152835	-0.109205	-0.205562	-0.0398645	0.20402	-0.0546227	-0.00313616	0.158486	-0.00970125	0.052495	-0.0389252	0.123145	-0.0807047	0.125276	-0.105128	0.0178099	0.0643773	-0.0356941	-0.107888	0.109048	0	0.0691673	-0.199266	0.167192	-0.202307	0.401597	-0.13655	0.292141	-0.172233	0.435593	-0.157122	10571763	4930555F03Rik
-0.160906	-0.0981808	-0.106042	-0.0911427	0.0459495	0.176992	-0.0669746	-0.314615	-0.246049	-0.0379915	-0.113369	-0.0843582	-0.160533	0.385809	0.196675	0.227422	0	-0.108861	0.286707	-0.272425	0.35752	-0.0952921	-0.0299888	0.124034	0.378964	0.105005	0.24984	-0.179539	0.673883	-0.0784086	0.353021	-0.162822	0.917539	-0.0384726	10423919	4930555K19Rik
-0.0926094	-0.0782132	-0.136635	-0.158714	-0.0978022	-0.176105	0.0643859	0.202136	0.148328	-0.0112519	0.0995865	0.036437	0.0468741	0.122082	0.202898	0.153088	-0.099474	0.185341	0.0823193	-0.0465336	0.0149107	-0.0522819	-0.147138	-0.132071	0.00198888	-0.213283	0.00536428	-0.247298	0.026231	-0.202998	0.143017	-0.140245	0.959214	-0.0128498	10451708	4930556A20Rik
-0.0277266	-0.0716996	0.0690694	0.140542	-0.038774	0.229197	0.165539	-0.0277266	0.0884614	0.0614553	0.0919004	0.0732775	0.114029	-0.0277266	-0.132006	0.0254684	-0.0120659	0.244177	0.0165391	-0.211029	-0.279405	0.00282383	-0.186522	-0.2271	0.821936	-0.025383	0.662633	0.0653361	0.837278	-0.0357583	0.140705	0.208067	0.249517	0.187034	10383810	4930556J24Rik
0.0125461	-0.105372	0.0122542	-0.0935354	-0.199256	-0.122701	0.322638	0.160897	0.137857	0.137658	0.0624986	0.000595	0.364122	0.0863285	-0.00213385	-0.0569262	0	-0.0524635	-0.0297756	-0.0812087	-0.240701	-0.289429	-0.24017	-0.212504	0.0251357	-0.219701	0.0720389	-0.232116	0.781503	-0.0462142	0.856196	0.0345511	0.32604	0.16469	10488584	4930556L07Rik
0.0476089	-0.224147	-0.201509	-0.0158067	-0.121684	-0.207868	-0.218517	0.0162125	-0.056972	-0.146407	0.0707965	-0.0150733	0.0682392	0.1301	0.0547199	-0.0431528	0.0698891	0.00614977	-0.26719	-0.0417104	0	-0.0777845	-0.0800128	-0.250478	0.487102	-0.0622408	0.0671976	-0.204921	0.284608	-0.131529	0.918993	-0.0176009	0.96102	0.0155244	10598601	4930557A04Rik
0.310012	0.101382	0.278471	0.163205	0.0200572	0.232378	-0.0614543	2.50965	0.0294323	-0.0356469	2.37741	-0.00458336	-0.00234032	0.0248246	0.0105023	-0.0318832	-0.0649009	-0.0199013	-0.0654287	0.0552635	-0.102692	0.0233502	0.0174627	0	0.0605153	-0.618216	0.735154	0.173255	0.675246	0.223146	0.696769	0.22187	0.853758	0.170647	10408241	4930558J22Rik
-0.111085	-0.145909	-0.0448961	-0.075242	-0.0493154	-0.0415945	0.0475912	0.0765972	-0.117391	0.0813417	0.07476	-0.0704012	-0.119062	-0.0186992	-0.033155	0.155487	-0.0859633	0.12586	0.0402451	-0.0347075	0.123051	-0.0543189	0.0924764	0.00328493	0.687428	-0.0934234	0.955893	-0.0210349	0.676721	-0.143135	0.748326	-0.12087	0.885111	-0.0918212	10359473	4930558K02Rik
-0.121999	0.0179715	-0.0924473	-0.136435	-0.0817194	-0.123534	-0.0477085	0.128508	0.219201	-0.0496912	0.0615816	-0.0116072	-0.14689	0.123482	0.0612588	-0.119668	-0.00113535	0.188855	-0.0263028	0.527471	0.157879	-0.189995	-0.122148	-0.270431	0.145444	-0.139741	0.450579	-0.102311	0.432819	-0.112378	0.0173749	-0.309376	0.596421	0.104498	10567524	4930560O18Rik
-0.0899696	0	0	-0.125739	-0.0361967	0.0356021	0.157382	0.0303664	0.328994	0.119616	0.12175	0.251509	-0.0523953	-0.096611	0.0626035	-0.0588064	-0.0644703	0.038784	-0.0708294	0.0962238	-0.0452251	-0.266275	-0.21878	-0.188361	0.00194068	-0.20432	0.949405	-0.00724959	0.947376	-0.00788633	0.805204	-0.0294403	0.0392115	0.188421	10433302	4930562C15Rik
-2.19582	-2.25605	-1.57525	-0.749096	-0.687327	-0.272388	0.070343	0.314081	0.732871	1.3524	1.42167	2.03983	0.0292597	-0.527667	-0.395254	-0.468657	-0.849226	-0.604947	0	-0.123855	0.696201	-0.571585	-0.270941	-0.226656	2.38e-07	-2.27785	0.0490442	-0.991434	0.23515	-0.648377	0.00424904	-1.4801	0.103821	-0.932927	10359303	4930562F07Rik
-0.359582	-0.302796	-0.320425	-0.131193	-0.11924	-0.150465	-0.179437	-0.285135	-0.0681634	-0.022954	-0.0292339	0.0103569	0.0126109	-0.0629401	-0.0840635	-0.0563564	-0.0533843	-0.00617695	0.0140352	0.103978	0.0116486	0.111152	0.201042	0.249334	0.167777	-0.134856	0.1513	-0.185819	0.159036	-0.191977	0.0402478	-0.273837	0.00159763	-0.417793	10440985	4930563D23Rik
-0.0658545	-0.238522	-0.313424	-0.0532789	-0.292651	-0.235336	-0.00828886	0.0931292	0.0798044	-0.000729	0.000729	0.0566053	0.0487804	0.141336	-0.137281	0.121105	-0.0918703	-0.00395489	0.206243	0.195525	-0.158645	-0.326304	0.0507774	-0.0484238	0.0247068	-0.236719	0.11875	-0.217456	0.157837	-0.208271	0.0530834	-0.280885	0.703723	-0.0918608	10378065	4930563E22Rik
0.0593519	-0.00278616	0.00642538	-0.00117063	-0.0346389	0.00119638	-0.0202227	0.0489716	-0.0162616	-0.0480127	0.0484118	-0.0226774	-0.00931597	0.103197	0	-0.00942278	-0.0107942	0.0770903	-0.0806112	-0.0455642	-0.0466633	-0.0417862	-0.0809832	0.00803423	0.982258	0.00636149	0.948143	-0.0265639	0.974396	-0.0142281	0.89236	0.0623426	0.960203	0.0429747	10593834	4930563M21Rik
-0.0208101	-0.0885568	-0.265418	0.112403	0.00319862	-0.117115	-0.236996	-0.172182	-0.193499	-0.127584	-0.12842	-0.0722213	0.171225	0.555202	-0.196989	0.103442	0.27328	-0.304002	0	0.15454	0.0537367	-0.24119	0.0174327	-0.14751	0.726897	0.0924338	0.484161	-0.239196	0.835443	-0.0869563	0.756145	-0.132142	0.940748	0.0610394	10451079	4930564C03Rik
-0.114668	-0.0148845	-0.0408874	-0.209478	-0.0938897	-0.0204797	0.0701241	0.244355	0.102495	-0.00716782	0.0843449	0.00251818	0.0153704	0.0617905	0.0437541	-0.119051	0	-0.00352097	0.0304503	-0.0800877	0.0688429	-0.149193	-0.0596209	-0.0712056	0.032669	-0.16516	0.239859	-0.122686	0.748395	-0.0415242	0.46709	-0.0887832	0.971484	0.0109586	10495077	4930564D02Rik
-0.0291309	0.0381346	0.0282116	-0.0190644	0.0167851	0.0242	-0.08884	0.131432	0.130017	-0.0793338	0.0472493	0.0318599	-0.00980377	0.0751429	0.0167294	0.0331621	-0.029243	0.0855408	0	-0.0228853	0.0233011	-0.00609589	-0.0490856	0.00393248	0.689886	-0.0188747	0.80003	-0.0175002	0.786834	-0.019964	0.911885	0.00971739	0.810629	0.026939	10503019	4930566N20Rik
-0.0933361	0.0976124	-0.332183	-0.473162	-0.257837	-0.752054	-0.740143	-0.689306	-0.831125	-1.18976	-1.19771	-1.17339	-1.35352	0.235961	-0.676797	2.03379	1.00728	0.227268	0.278207	0.830809	1.75252	-0.819882	-0.972972	-0.363362	0.0595766	0.668413	0.569329	0.296292	0.00369014	-1.39127	0.00894367	-1.25567	0.555035	0.416912	10443463	4930567H12Rik;Cdkn1a
0.00452375	-0.0816603	-0.0648308	-0.00848579	-0.0991049	-0.123551	-0.00914335	-0.0851336	-0.0683269	-0.0582638	-0.0768695	-0.0790253	0.0603852	0.0332031	-0.0484309	-0.135535	-0.0665698	0.000159	-0.0027833	0.047236	-0.0780416	-0.111474	0	-0.0116963	0.99427	0.000608842	0.446641	-0.0772374	0.970161	0.00513046	0.677644	-0.0509886	0.92976	-0.0211283	10604918	4930567H17Rik
-0.0637999	0.0116887	-0.079206	-0.0734177	-0.0443082	-0.054471	-0.155389	0.212485	-0.0306473	-0.103725	0.0716801	-0.0381794	-0.0248527	-0.0109034	0.146516	-0.01157	0.0288882	0.0102816	-0.102889	0.0102816	-0.0280495	-0.167042	-0.00264597	0.232112	0.627282	-0.0432898	0.453426	-0.0875056	0.649163	-0.0597856	0.954137	-0.0103665	0.706491	-0.0713939	10482045	4930568D16Rik
-0.146354	-0.0349937	-0.0691037	-0.106885	-0.127999	-0.0863218	0.10004	-0.12179	0.040206	0.096138	-0.123714	0.082346	-0.0103707	-0.00802326	0.0288072	0.14797	0.0652671	-0.090467	-0.0238485	0	0.0388994	-0.0869498	-0.0633516	-0.134516	0.0735073	-0.107481	0.221968	-0.0987474	0.101055	-0.1362	0.257714	-0.100293	0.998818	-0.000337283	10524842	4930569F06Rik
-0.132118	-0.210341	-0.162375	-0.125769	-0.182305	-0.19404	0.0466318	0.188588	0.12834	0.0033412	0.157767	0.136136	0.0366616	-0.00375938	-0.0184574	-0.019794	0.0345478	0.0728531	-0.148806	-0.0321946	-0.164635	-0.102032	-0.0813293	-0.1837	0.0034359	-0.277959	0.165629	-0.17264	0.129379	-0.197027	0.750781	-0.052613	0.865434	-0.045471	10557315	4930571K23Rik
0	0.0606918	0.0693722	0.167227	0.00498247	0.138042	-0.0358758	0.00555563	0.0440583	0.126593	0.0814528	-0.00498295	-0.248339	-0.164178	-0.313944	0.0157962	0.125296	-0.00555372	0.223974	0.0314832	0.270223	-0.207399	-0.0680108	-0.00878859	0.737854	0.0372524	0.0169101	0.31554	0.874678	0.0282065	0.530996	-0.101841	0.330562	0.168119	10491920	4930577N17Rik
-2.01462	-1.92882	-2.0579	-0.316955	-0.436768	-0.497072	-1.41223	-1.58807	-1.24977	-0.0541024	-0.311016	0.26195	-0.775654	-0.499771	-0.637617	0.793232	1.15261	0.506405	-0.0264101	0.0418172	-0.204621	-0.424171	-0.0239377	0.00494146	0.212121	-0.483149	0.2729	-0.571009	0.000113342	-2.0261	0.0288564	-1.14562	0.0548582	-1.06097	10603796	4930578C19Rik
0.0625372	0.582538	0.385499	-0.0442314	0.363312	0.425435	-0.0764947	-0.069499	0.014638	-0.139064	-0.0627131	-0.00446415	-0.0602965	0.0934706	-0.114527	0	0.224834	-0.120152	0.0178647	-0.0035944	-0.0119648	-0.0446258	-0.212401	-0.0666666	0.00539368	0.352115	0.0488715	0.322966	0.133604	0.260954	0.0921179	0.29508	0.020642	0.403746	10504203	4930578G10Rik
-0.111587	-0.309277	0.0504713	-0.074966	-0.255682	0.00300694	-0.03723	0.0863771	-0.0597339	-0.0263014	0.098546	0.0651293	0.0745792	-0.0330539	-0.135138	0.104805	-0.0597191	0.126296	0.110962	-0.154664	0.202397	-0.152834	-0.134041	0	0.143507	-0.13747	0.530673	-0.0851346	0.18955	-0.173466	0.214813	-0.169237	0.952124	-0.020714	10420798	4930578I06Rik
-0.187577	0	-0.0848775	-0.0777407	-0.00651693	-0.0641131	-0.146982	0.0308871	-0.154783	0.00651646	0.0562596	-0.198443	-0.0324612	0.165297	0.0308871	0.130902	-0.0376697	0.122385	-0.113469	0.21802	-0.0863996	-0.0152259	-0.399084	-0.135675	0.981985	-0.00238013	0.280239	-0.124712	0.241567	-0.14201	0.587065	-0.0761882	0.481895	0.113191	10416120	4930578I07Rik
-0.106372	-0.100151	0.0210824	-0.0959759	-0.104432	-0.169623	0.0174675	0.12703	-0.134194	-0.000867	0.0957451	-0.178227	-0.24315	0.0212927	0.228617	0.049077	-0.0343203	-0.0430298	-0.232961	-0.0901499	0	0.00557566	-0.053103	-0.227129	0.622199	-0.0804044	0.678502	-0.0948318	0.741142	-0.0831542	0.964326	0.0151251	0.998723	-0.00102663	10502395	4930579F01Rik
-0.424556	-0.374011	-0.429401	-0.0153913	-0.0094943	-0.200901	0.0170641	-0.0693831	0.0872064	0.487391	0.486754	0.637637	0.188717	-0.228416	1.05168	0	0.22426	-0.568117	-0.113054	-0.193512	0.226916	-0.0786524	0.122247	0.0339694	0.0437043	-0.516737	0.0866921	-0.57962	0.76821	-0.127673	0.614112	-0.215742	0.619014	-0.268147	10415092	4930579G18Rik
-0.0761643	0	-0.263937	-0.228064	-0.074275	-0.293158	0.547327	0.125229	0.119571	0.541837	-0.00105095	0.0282116	-0.16173	0.00133038	0.863182	0.0199714	-0.0824761	0.0649705	-0.0344472	-0.200147	0.354584	-0.270295	-0.122702	-0.487439	0.00681431	-0.382787	0.0334531	-0.390194	0.45774	-0.156755	0.357408	-0.19593	0.650231	0.137545	10492679	4930579G24Rik;4930579G24Rik
-0.13849	0.0960479	-0.128089	-0.0683503	0.0672908	-0.0647559	0.0200329	0.0359306	-0.15621	0.0131593	0.00135946	-0.0477576	-0.0106721	-0.0474854	-0.028656	-0.119461	0.400754	0.119992	0.214488	0.278353	-0.174636	0.162889	0.154975	0.25688	0.86892	-0.0171435	0.947757	-0.0104533	0.171072	-0.173153	0.275923	-0.14546	0.0812179	-0.230973	10595895	4930579K19Rik
0.326234	0.363432	0.164103	0.0888782	0.201742	0.266267	0.457276	-0.302743	-0.0145268	0.479265	-0.263926	-0.0865054	-0.0564814	-0.455446	-0.116257	-0.240003	0.174924	0.106852	0	0.0675869	-0.254125	-0.00882149	0.0565982	0.308719	0.217845	0.190303	0.0267653	0.444504	0.321159	0.221185	0.176273	0.297289	0.75227	0.116277	10584187	4930581F22Rik
0.154961	-0.132202	-0.0944061	-0.0569339	-0.253695	-0.20909	-0.0325007	0.181859	0.154471	-0.0469456	0.119359	0.0521727	0.0535636	-0.0568934	-0.00458384	0.0938883	-0.00115347	0.129568	-0.0527196	-0.0226555	0	-0.0813551	-0.0868492	-0.145899	0.0313944	-0.169964	0.382952	-0.0959233	0.115373	-0.172662	0.570735	-0.0734361	0.984435	0.00613992	10452445	4930583I09Rik
-0.117396	-0.184932	-0.108885	-0.233158	-0.235154	-0.23066	0	-0.161134	0.0409045	-0.0728197	-0.141323	0.00105715	0.0281959	0.0141053	-0.0487838	0.0231867	0.0107703	0.191302	0.167834	-0.0436139	-0.219657	-0.294208	0.0442405	-0.230915	0.120131	-0.129478	0.0959434	-0.18287	0.021171	-0.260117	0.203596	-0.153218	0.928624	-0.0247367	10556613	4930583K01Rik
-0.137488	-0.0574245	-0.167171	-0.0937734	-0.123744	-0.105949	-0.143575	0.0709519	-0.0447049	-0.0362539	0.0659261	0.0104332	0.0854158	-0.197851	0.0247321	-0.0119882	0.0158434	-0.03722	0.0225372	0	0.0761766	-0.180306	0.0158877	-0.10245	0.468695	-0.101388	0.67337	-0.085024	0.625156	-0.103137	0.487145	-0.147163	0.959437	-0.0253023	10528827	4930584F24Rik
0.571901	0.788013	0.992546	0.0635982	0.441753	0.556985	1.04209	0.0141816	0.0112982	0.718166	-0.18808	-0.225485	-0.110851	-0.111137	0	-0.136814	-0.110383	-0.130143	-0.0593448	-0.048594	-0.0866523	-0.17095	-0.241155	-0.0097332	0.0567185	0.340438	0.00636515	0.643129	0.00396579	0.694913	0.00875161	0.633996	0.0036262	0.709745	10492668	4930589L23Rik
-0.315482	-0.285303	-0.261017	-0.268491	-0.231618	-0.214335	0.144777	0.0815396	0.124324	-0.00658131	0.12947	0.113314	-0.0778604	-0.0704889	0.0818043	0.0425258	0.033092	0.0199981	-0.0962191	-0.0195189	0.00695562	-0.278689	-0.210455	-0.0950799	3.02e-06	-0.360515	0.00844324	-0.240526	0.00168374	-0.29458	0.016348	-0.226447	0.65272	-0.067966	10540148	4930590J08Rik
-0.0969214	-0.273352	-0.139118	-0.155491	-0.375261	-0.145918	-0.0686417	0	0.0162826	-0.14531	-0.108259	-0.0225687	0.215121	0.257862	0.262539	-0.0376411	-0.0952883	0.234535	0.133711	-0.0526991	-0.00185728	-0.185719	-0.143753	-0.0695696	0.138851	-0.142927	0.000598422	-0.442851	0.080672	-0.231545	0.0977579	-0.224062	0.790692	-0.0646634	10479270	4930591A17Rik
0.00342751	-0.363083	-0.156002	-0.0131745	-0.177016	-0.0780492	0.235124	0	0.181403	0.0891099	-0.0221653	0.0355344	-0.074945	0.11719	-0.0752597	0.833029	1.34747	0.225542	0.00796509	-0.0372248	-0.0475493	-0.0905156	-0.0305862	0.0133252	0.154489	-0.217151	0.593495	-0.119645	1.09e-05	-0.932663	0.687681	-0.105047	0.81062	-0.0947241	10417208	4930594M22Rik
-0.0594344	-0.102751	-0.0608635	-0.0400701	-0.0418034	-0.0267267	0.00724173	0.0341959	0.0657134	-0.0412602	0.0195408	0.0700536	-0.0108304	0.00687647	0.0818372	0.0562124	0.0274758	-0.0881848	-0.0212851	-0.064518	-0.0160103	-0.110286	0.00796699	-0.117147	0.0578996	-0.081189	0.154715	-0.0812359	0.396952	-0.0537759	0.78542	-0.021337	0.890747	0.0178806	10605561	4930595M18Rik
-0.0420589	0	-0.125565	-0.0876751	-0.0950346	-0.175203	0	0.21472	-0.174707	0.0236621	0.00587511	-0.166083	0.0616064	0	0.0550737	-0.021945	-0.0685725	0.14077	-0.078804	0.117677	-0.135785	-0.166943	-0.0701289	-0.171856	0.402828	-0.0715006	0.256468	-0.126483	0.391642	-0.10434	0.697582	-0.0552854	0.823619	0.0487198	10418982	4930596D02Rik
-0.33261	-0.315575	-0.166146	-0.267607	-0.453394	-0.194178	0.258708	0.039289	0.652121	0.247468	-0.00439882	0.252853	0	0.023665	0.155658	-0.0508151	0.0913076	0.118477	-0.0841732	-0.240934	0.0477948	-0.33458	-0.029129	0.0529485	0.000293569	-0.529258	0.0573305	-0.348026	0.0745432	-0.341242	0.35529	-0.195814	0.484881	-0.184665	10545127	4930597O21Rik
0.100844	-0.215537	0.302254	-0.0905862	-0.352203	-0.0197897	-0.0286593	0.120162	0	-0.160402	-0.141469	-0.00569296	0.0922499	0.00850391	-0.0127063	-0.0482578	0	0.142274	0.139959	-0.011909	-0.223028	-0.0934129	-0.0829587	-0.0650592	0.936411	-0.00982603	0.628452	-0.0751855	0.64199	-0.0771751	0.949603	-0.014177	0.918113	0.0346406	10537426	4930599N23Rik
-0.0765362	-0.138601	-0.109107	-0.0758772	-0.0918136	0.00325966	-0.0635467	-0.07406	0.0255542	-0.0373754	-0.023397	0.052856	-0.00780725	0.0104756	0.00986099	0.0241547	0.027544	0.00350618	0	-0.0502954	0.0285487	-0.127356	-0.0570917	-0.0516634	0.214549	-0.0614511	0.192225	-0.0856224	0.145455	-0.0998476	0.313475	-0.0741971	0.988433	-0.00274221	10599863	4931400O07Rik
-0.266923	0	-0.125769	-0.189025	-0.0940738	-0.0751381	-0.0295439	-0.0413027	0.19702	-0.073473	0.00547314	0.229726	0.114598	0.156159	0.0355563	0	-0.0836372	0.203148	0.0851593	-0.0611243	0.0931258	-0.175679	-0.244268	-0.156283	0.0175278	-0.173138	0.0171625	-0.227259	0.100223	-0.164992	0.108677	-0.164209	0.680672	0.0669219	10413180	4931403M11Rik
-0.12162	-0.128871	-0.250693	-0.185873	-0.171442	-0.149828	0.035306	0.53897	0.0425506	-0.114764	0.416259	-0.0352778	0.140626	0.0607023	-0.127258	0.0687985	-0.0480976	-0.00435686	-0.0696201	-0.127187	0.00687504	-0.38806	-0.120339	-0.218409	0.0013484	-0.315229	0.127919	-0.192745	0.198267	-0.173503	0.490591	-0.104744	0.745867	0.0742148	10562696	4931406B18Rik
1.03307	1.38622	1.04195	0.555379	0.792651	0.619875	-0.115466	-0.431445	0.459983	-0.756305	-0.857804	-0.299081	-0.787734	-0.782948	-0.342824	-0.0174742	0.14441	1.21126	0.106382	0	-0.413103	2.44624	0.60036	0.971115	0.000194156	1.23821	0.000281455	1.54269	0.317715	0.458791	0.0187878	1.0071	0.460377	-0.43438	10591022	4931406C07Rik
-0.576051	-0.473401	-0.592338	-0.0793009	0.0969243	-0.0336947	-0.342077	-0.454933	-0.514464	-0.069262	0.335465	0.0762353	0.0434904	0.00916529	0.295205	0.133451	-0.204778	-0.195309	0.189815	0.255035	0.623209	-0.0840044	0.111824	0.144363	0.641538	-0.114804	0.197187	-0.392264	0.600397	-0.187431	0.0427935	-0.63233	0.418753	-0.333704	10413216	4931406H21Rik
-1.62459	-1.76039	-1.11751	-0.403365	-0.470673	-0.0332088	-1.59958	-1.98604	-1.43944	-0.295263	-0.826977	-0.239913	-0.711404	-0.251529	-0.507957	0.112674	0.346904	0.168699	0.418575	0.544729	0.359017	-0.113803	0.119051	0.153436	0.64763	0.162913	0.364459	-0.411326	0.0121514	-1.11105	0.00241555	-1.3424	0.0406893	-0.954517	10562368	4931406P16Rik
0.0147557	-0.0910869	-0.0805898	-0.0715589	-0.107974	-0.0648289	0.0144916	0.132052	0.136065	-0.0173716	0.0242963	0.0364041	-0.0555277	-0.0415053	-0.0940204	-0.0835362	-0.0311441	0.144607	-0.119578	-0.0541267	0.00599575	-0.0438261	-0.0581851	0.0959144	0.0607992	-0.121203	0.979558	-0.00319592	0.427005	-0.076856	0.93643	-0.0109773	0.640763	-0.0648481	10353669	4931408C20Rik
-0.0912785	-0.21765	0.0347753	-0.117938	-0.185357	-0.0062089	-0.00916767	0.0118985	0.075757	-0.0649862	-0.0307818	0.135373	-0.183916	-0.137171	0.0125647	-0.0339952	-0.0621619	-0.0578141	0.0477028	-0.00293779	0.102913	-0.0894842	-0.0993714	-0.0782933	0.459917	-0.116958	0.984859	0.00556461	0.863395	-0.0459524	0.550779	-0.146502	0.988679	-0.00822648	10528630	4931409K22Rik
0.144719	0.0270824	-0.0254173	0.0323014	-0.00641155	0.00641108	-0.283284	1.09901	1.07063	-0.135381	0.958766	1.03733	-0.166592	-0.330669	-0.0355625	0.0932126	0	-0.303714	0.14164	0.142479	0.255649	-0.0332823	0.0654569	0.258719	0.00366446	-0.594729	0.468818	0.207389	0.768702	0.0999481	0.659885	-0.150142	0.917131	-0.0671837	10419803	4931414P19Rik
-0.227842	0	0.0332542	-0.230004	-0.0983243	-0.0438032	0.0106926	0.0465927	0.028038	-0.0499883	0.0802283	-0.0212226	-0.112741	-0.00612783	-0.00111723	0.00555944	-0.0232353	0.0261068	0.198618	0.0587616	-0.001688	-0.190261	-0.198781	-0.00873327	0.156949	-0.110177	0.637714	-0.054458	0.397273	-0.0972637	0.0990473	-0.179684	0.863752	0.0381384	10570199	4931415C17Rik
0.0186863	-0.102862	-0.0681639	-0.10387	-0.152436	-0.0818949	0.0617976	0.238067	0.142663	-0.033247	0.0445018	0.08285	0.00892448	0.197317	0.130796	-0.0348377	-0.0358586	0.168361	-0.0669279	-0.0728421	-0.0583148	-0.159176	-0.0483465	-0.068594	0.0579947	-0.171196	0.104423	-0.194103	0.392848	-0.114312	0.934242	-0.0157286	0.978207	0.0102819	10545524	4931417E11Rik
0.046289	-0.0607924	-0.0408692	0.0247049	-0.0939827	-0.0446944	-0.0459976	0.0726237	0.10451	-0.0298438	-0.0361624	0.109927	-0.00183058	-0.057847	0.0324659	-0.129139	0.0410638	0.115844	-0.107393	-0.145323	-0.128676	-0.21283	-0.0499034	-3.91e-05	0.475045	-0.0574003	0.881811	-0.0191536	0.771726	-0.0374802	0.401602	0.0989067	0.745982	0.0593667	10485540	4931422A03Rik
-0.0021615	0.028573	0.00315332	-0.0317025	0.0339923	-0.0272098	0.00315332	0.0720801	0	-0.0312004	0.0542922	-0.0346985	-0.106965	-0.051619	0.00250959	0.00315332	0.085691	0.00719309	-0.0316529	-0.0956678	-0.0860486	-0.044662	-0.101355	-0.103402	0.960495	-0.00983032	0.845225	0.0527988	0.916879	-0.0312383	0.816444	0.0718973	0.856837	0.0839139	10469755	4931423N10Rik
-0.0555787	-0.0342746	-0.0820541	-0.104044	-0.1828	-0.135192	0.00035	0.00866365	0.0545506	0.0414028	-0.146998	0.105907	-0.014286	-0.0591407	0.178212	-0.0503388	0.0239558	0.034801	-4.15e-05	0	0.0131512	-0.18467	-0.168289	-0.0529866	0.140535	-0.109637	0.176943	-0.133919	0.34841	-0.101797	0.359955	-0.103361	0.864883	0.0363246	10581188	4931428F04Rik
-0.14506	-0.131297	-0.0998526	-0.16034	-0.0915651	-0.0852499	-0.00664663	0.0859213	0.0078969	-0.0615454	0.0801358	0.0569105	-0.0144958	-0.0725989	-0.0166688	0.0417376	0.00892925	0.255432	0.0665178	-0.0515566	-0.0247745	-0.158537	-0.112839	-0.133412	0.0082636	-0.146006	0.255373	-0.0843062	0.0027999	-0.220927	0.13744	-0.115623	0.929921	0.0160352	10353721	4931428L18Rik
-0.033525	-0.139834	-0.0878949	-0.0745206	-0.131391	-0.108926	0.0233145	0.00252247	0.0055151	-0.0152464	-0.134251	-0.037899	0.0140901	0.0646329	0.0675154	-0.0566402	-0.114657	0	0.00173759	-0.0234704	-0.0515523	-0.183329	-0.0950933	-0.158036	0.427647	-0.070008	0.202283	-0.144761	0.787671	-0.0389164	0.612315	-0.071587	0.826026	0.0494707	10593177	4931429L15Rik
-0.00518513	-0.27791	-0.176547	-0.0152078	-0.338818	-0.187778	-0.0931473	-0.0211382	-0.0804105	-0.0395341	-0.0890894	-0.132896	0.163738	0.021492	0.0958614	-0.00665236	0.0102377	0.00579071	0.0271788	0.0240755	0	-0.251398	-0.157596	-0.0781407	0.198798	-0.0908716	0.00496101	-0.260605	0.0782506	-0.170033	0.0579483	-0.183992	0.987371	-0.00452916	10409044	4931429P17Rik
0.197301	0.293876	0.0701203	0.130971	0.285883	0.0848751	0.326768	0.987239	0.385423	0.200684	0.813292	0.390138	-0.0251188	-0.186519	0	-7.06e-05	-0.131959	-0.030221	-0.0358257	-0.421947	-0.023087	0.088326	-0.14134	-0.425053	0.0121013	-0.340086	0.168346	0.247717	0.227145	0.231254	0.071458	0.337458	0.0923052	0.336526	10529480	4931431C16Rik
-0.269282	-0.191009	-0.313302	-0.162496	-0.10959	-0.226712	0	0.0120597	-0.0976171	0.0624428	0.0239935	-0.00261784	0.0332107	-0.00911426	0.0855422	0.0879812	-0.0324626	0.0610542	0.124539	-0.114678	0.0386901	-0.252099	-0.123852	-0.377402	0.0385502	-0.211775	0.0651484	-0.248612	0.0745452	-0.250923	0.114948	-0.228249	0.903002	0.0390524	10566304	4931431F19Rik
-0.157105	0.335121	-0.136332	0.0108399	0.176256	-0.0108395	-0.0789685	0	0.214345	-0.240175	0.0242305	0.0697827	-0.305217	0.0276189	-0.232602	0	0.188477	-0.102197	0.0351186	-0.0901585	-0.248245	-0.0502286	-0.0614057	-0.395635	0.760497	0.0381208	0.16977	0.20639	0.971848	0.00756343	0.434593	0.137418	0.269704	0.205413	10384883	4931440F15Rik
0.0058527	-0.236174	0.0780387	-0.177571	-0.462004	0.0255265	0.210123	0.518307	0.0700221	0.0402002	0.263226	-0.0288572	-0.0946951	-0.0703263	0.098279	-0.0318923	0.0419025	-0.221021	-0.00133467	0	-0.0909085	-0.234394	-0.224423	-0.327295	0.0135071	-0.306559	0.558039	-0.105474	0.785081	-0.057385	0.641571	-0.0969741	0.597967	0.134316	10498526	4931440P22Rik
0	-0.0706401	-0.0415244	0.0293689	-0.0829153	-0.0724511	-0.131696	0.1157	0	-0.0887814	0.0716887	0.0234137	0	0.0613008	0.0232968	-0.0233903	-0.036747	-0.0058794	-0.0434346	0.00313234	-0.0615182	-0.0313706	0	0	0.39939	-0.0380812	0.248926	-0.0678929	0.81523	-0.0176881	0.951249	-0.00575352	0.790681	-0.0292368	10606583	4932411N23Rik
-0.0344872	-0.135419	-0.0424099	-0.114749	-0.225424	-0.0581336	0.0162921	0.207359	0.0972047	-0.021821	0.112196	0.0321684	0.119964	-0.0272679	0.0168161	0.0437112	-0.133336	-0.00987482	0	-0.145043	0.13395	-0.0815625	-0.0801582	-0.0582995	0.014745	-0.17567	0.147226	-0.138275	0.535519	-0.0686038	0.370057	-0.0980728	0.897522	-0.0284304	10439520	4932412D23Rik
0.0240622	-0.1987	-0.126104	0.013854	-0.194283	-0.0931659	-0.0540571	-0.0598364	0.0252237	-0.082243	-0.0167437	0.0859547	0.0652843	0.108433	0	0.0696259	-0.0885968	0.105584	-0.0232873	-0.0330787	-0.0796967	-0.221166	-0.0694614	-0.098516	0.296382	-0.0787725	0.116437	-0.153628	0.236741	-0.124594	0.692627	-0.0503685	0.875461	0.0339916	10384595	4932414J04Rik
-0.141264	-0.0864515	-0.0195007	-0.146776	-0.121401	-0.0645647	0.00579071	0.0169749	0.0528894	-0.0228224	-0.0325546	0.00564623	0.00120401	-0.0312858	0.0787916	-0.0381656	0.17154	0.067883	-0.0367832	-0.10503	-0.148638	-0.0914807	-0.0555582	-0.141045	0.123823	-0.10098	0.198184	-0.112896	0.0683516	-0.163745	0.999388	0.000157677	0.998401	-0.000631808	10445935	4932414J04Rik;4932415M13Rik
-0.0395126	0.00997114	-0.0521855	-0.0662074	-0.0427499	-0.11	0.00596142	0.0167255	0.0519586	-0.0409694	-0.0277867	-0.00278854	0.0489855	-0.00875997	-0.039185	0.0450344	-0.056891	0	-0.0958877	-0.0790682	0.0476441	-0.139795	-0.154623	-0.137879	0.797628	-0.0506309	0.86315	-0.0504609	0.882786	-0.0461619	0.983946	-0.00767684	0.845863	0.0939848	10472469	4932414N04Rik
-0.150398	-0.273341	-0.0453811	-0.115783	-0.183399	-0.0688853	0.027885	0.196158	0.0132585	-0.0184283	0.0301132	-0.00487566	-0.0371718	0	-0.0485468	0.0376849	-0.0598841	0.160772	-0.0116925	-0.0682268	0.0820045	-0.106742	-0.131687	-0.0242586	0.0167487	-0.180216	0.276288	-0.110958	0.0713826	-0.185722	0.195886	-0.140226	0.781369	-0.0519687	10445926	4932415M13Rik
-0.222193	-0.175555	-0.24832	0.0817242	0.0278578	0.0204611	0.317698	0.455226	0.27356	0.547857	0.819278	0.416891	0	0.311463	-0.438249	-0.0475264	-0.260163	0.0698671	0.617876	0.397422	0.191121	0.097578	0.252859	0.375969	0.00642777	-0.557756	0.898938	-0.0437425	0.986727	-0.00673008	0.0844629	-0.488144	0.351216	-0.32814	10525487	4932422M17Rik
0.19456	0.100726	-0.00377846	0.291284	0.0894423	0.0558405	-0.258184	-0.376832	0.189012	0.0033865	-0.277541	0.551809	0.309298	-0.167541	0.0382318	0.00591373	0.230936	-0.0365686	0.170112	0.00477696	0	-0.30027	-0.145747	-0.177494	0.407223	0.149404	0.827806	0.0613494	0.858911	0.0545853	0.851564	0.0630495	0.245383	0.329183	10587653	4932427H20Rik
-0.0681267	0.0969391	0.051537	-0.190945	-0.0197077	-0.0483251	-0.0609608	0.214032	0.0748992	-0.144315	0.142598	0.00852156	0.113987	-0.0765877	0.102413	-0.0823474	-0.0330381	-0.143592	0.0163336	0.110657	0.0430684	-0.0972376	-0.0885811	-0.0713224	0.487276	-0.0689005	0.581603	-0.0763755	0.715849	0.0565546	0.576601	-0.0864576	0.82263	0.0559424	10531479	4932430I15Rik
-0.0618205	-0.167867	-0.17338	-0.0376124	-0.0651655	-0.227798	-0.160144	0.278958	0	-0.106782	0.0298271	-0.0429516	0.0830808	0.0178223	-0.0251303	-0.0287657	-0.178265	0.279825	0.15403	0.00206423	0	-0.253069	-0.113843	-0.198482	0.127835	-0.122092	0.167254	-0.147532	0.194456	-0.146539	0.124094	-0.174305	0.723321	0.0661906	10551752	4932431P20Rik
0	-0.00823164	-0.0270124	-0.136465	-0.0917554	-0.00410366	-0.028491	0.0687981	0.111382	-0.0756988	-0.0936723	0.00276661	-0.115763	-0.00309896	-0.0478201	0.014194	0.140052	0.0448189	0.00403976	-0.0649018	-0.0260277	-0.170248	-0.194921	-0.205748	0.552827	-0.0421089	0.9241	0.0109659	0.242712	-0.11095	0.907411	-0.0156314	0.157879	0.145711	10392787	4932435O22Rik
-0.118784	0.0580435	0	0.101261	0.424062	0.269254	-0.295345	-0.44304	0	0.0654507	-0.13595	0.196731	-0.452921	-0.295787	-0.841494	0.185672	-0.0623121	0	0.348621	0.336656	0.341562	0.777857	0.793735	0.841703	0.350563	0.281028	0.265642	0.594766	0.764757	0.0575941	0.760611	-0.19456	0.261011	-0.659144	10491564;10491595;10491597;10491599;10491601;10491603;10491605;10491607;10491609;10491611;10491613;10491615;10491617;10491619;10491621;10491623;10491625;10491627;10491629	4932438A13Rik
0.256443	-0.0358124	0.0455618	0.0782676	-0.103583	-0.039701	0.140179	0.250767	0.375629	0.0451145	0.0218787	0.354098	0.0282202	0	0.0019722	-0.110736	-0.138485	-0.020371	-0.00960827	-0.0832524	-0.0719142	-0.221329	-0.134915	-0.0349693	0.114681	-0.164415	0.894442	0.0234651	0.428196	0.123393	0.610005	0.0884542	0.371573	0.163934	10440903	4932438H23Rik
-0.0319247	-0.0522528	-0.188939	-0.0673637	-0.106003	-0.224687	-0.0265512	0.0558415	-0.0591826	-0.0871777	-0.0808406	0.0217152	-0.0656643	0.0587339	-0.0858631	0.0914731	-0.138947	-0.0104847	0.00440645	0	-0.0127921	-0.0931592	0.164093	0.182174	0.189951	-0.0824958	0.347548	-0.0809306	0.309053	-0.0925423	0.233549	-0.109067	0.0255595	-0.196231	10576840	4932443L11Rik
-0.00430822	0.0170569	-0.0473027	0.00103903	0.00152206	-0.0337548	-0.0275464	-0.0479279	0.0215039	-0.0156517	-0.00117445	-0.00673342	-0.0223455	0.00430059	-0.039845	-0.0515666	0.0615525	-0.0487642	0.318897	0.299249	0.0235324	-0.0660019	-0.055573	-0.0230026	0.986766	0.0019637	0.961544	0.00833869	0.991757	0.00196815	0.0963774	-0.224851	0.900896	0.0372345	10607945	4933400A11Rik
-0.109429	-0.0862594	-0.225759	-0.0916848	-0.00549221	-0.254097	-0.132834	0	0.0361204	-0.206578	0.0199461	0.0521283	0.109058	-0.0147195	0.0184717	-0.11316	0.0797343	-0.042779	0.0780916	-0.144995	0.0549655	-0.191094	-0.0350475	-0.080894	0.317642	-0.0902507	0.15679	-0.16639	0.433516	-0.103385	0.351248	-0.124808	0.928133	-0.0264416	10601430	4933401B06Rik
-0.0891328	-0.117375	-0.0241694	-0.210516	-0.262894	-0.158833	0.216445	0.0555448	0	0.141245	-0.0689616	-0.111018	0.0675306	-0.0140438	0.210731	0.018342	-0.013546	-0.0963087	-0.107593	0.0114565	0.0242529	-0.0870595	-0.0788574	-0.0484433	0.0213691	-0.182696	0.025641	-0.231893	0.326667	-0.113316	0.313271	-0.119859	0.684679	-0.0723667	10355134	4933402D24Rik
-0.0242491	-0.10873	-0.0951796	-0.152084	-0.170952	-0.0764484	0.0341082	0.134189	0.0790229	-0.045702	0.00317526	-0.00158548	-0.0165248	0.181427	-0.0952544	-0.0268002	0.00527668	0.0426354	-0.0393023	-0.00275946	0.136734	-0.0720654	-0.0831833	-0.0875101	0.0217885	-0.138475	0.108547	-0.127823	0.188801	-0.111645	0.108716	-0.136165	0.898555	-0.0236877	10599858	4933402E13Rik
-0.151898	-0.106246	-0.153773	-0.12167	-0.102096	-0.0898433	-0.218378	-0.0594878	0.0285783	-0.178167	-0.0318761	-0.0309648	0.0341353	-0.0654602	-0.0171709	0.0720038	-0.0115075	-0.0201025	-0.00165319	-0.0649328	0.0451703	-0.149117	0	0.0128164	0.614517	-0.0392052	0.285745	-0.104756	0.186157	-0.134386	0.289155	-0.113783	0.6185	-0.0754876	10573696	4933402J07Rik
-0.183211	-0.11149	-0.0814342	-0.167762	-0.194457	-0.147249	-0.015233	0.031148	0.185482	-0.026927	0.046937	0.06529	-0.0390911	0.0141597	0.000861	-0.0805297	0.0862413	-0.0956082	0.113582	-0.207103	0	-0.126003	-0.010643	-0.0242081	0.0235058	-0.195383	0.228779	-0.139577	0.350713	-0.117635	0.376925	-0.116427	0.596624	-0.0939825	10568496	4933402N03Rik
-0.0367155	-0.281771	-0.0436668	-0.0971618	-0.193347	-0.0341797	-0.0644069	0.230129	-0.0748477	-0.0228901	0.18135	0.0869632	-0.0543899	0.0562606	0.179574	0.1914	0.0609622	-0.00760508	0.189423	0	-0.0582485	-0.349523	-0.145016	-0.193296	0.116786	-0.170523	0.231807	-0.174955	0.201311	-0.196059	0.334881	-0.158198	0.613416	0.114805	10387651	4933402P03Rik
-0.0457478	0.0137749	-0.0595107	-0.0845718	-0.0220265	-0.0715284	-0.00800657	0.0508966	-0.000772	-0.00165701	0.0178838	-0.010179	0.0334325	-0.0368266	-0.0491161	-0.0160184	-0.0323429	0.0397968	0.00538492	-0.0628429	0.0417242	-0.0490217	0.00538492	-0.117826	0.797982	-0.0529627	0.932255	-0.0274316	0.898238	-0.0420802	0.915565	-0.0396905	0.990202	0.00888586	10438042	4933404G15Rik
-0.165688	-0.243288	-0.303199	-0.135337	-0.216888	-0.135149	-0.0519237	-0.0704207	0.0808196	-0.00863981	-0.0923047	0.0124807	0.100412	0.188474	-0.0596647	0.0148888	0	0.0274458	0.182079	0	-0.172699	-0.246461	-0.0366669	-0.145331	0.0404392	-0.17826	0.0156969	-0.276332	0.0735427	-0.214036	0.0969979	-0.203052	0.797521	-0.0571052	10574872	4933405L10Rik
-0.247344	-0.243811	-0.0371571	-0.0386658	-0.11941	-0.0586653	0.0145254	-0.110584	-0.0011282	0.00549936	-0.0984297	-0.0101399	-0.0684357	0.0602951	0.0772071	-0.118735	0.0168543	0.212858	0	-0.228559	-0.00812817	-0.258635	-0.306849	-0.19923	0.486471	-0.0907993	0.395347	-0.147198	0.376894	-0.161168	0.850636	-0.0452796	0.61461	0.130729	10553471	4933405O20Rik
0.0572205	-0.0537658	0.0910406	-0.0327883	-0.117524	-0.0656109	0.0323958	0.0335326	-0.143282	-0.0089941	-0.101375	-0.0670362	0.10181	-0.122366	0.205766	-0.0428648	-0.0322046	0	-0.0773177	-0.0505137	-0.227133	-0.077229	-0.0182719	-0.00315332	0.785235	0.022222	0.423462	-0.0819748	0.972372	0.00478522	0.378823	0.0980835	0.963084	0.0126468	10349997	4933406M09Rik
0.176536	0.164596	0	0.245711	0.155606	0.0785608	-0.0766859	-0.113235	-0.152602	-0.0148125	-0.0459285	-0.0584769	-0.136142	-0.163239	-0.104485	0.147838	-0.036952	0.0612431	-0.0231776	0.194101	0.195916	0.192233	0.0448832	0.198795	0.000567333	0.213792	0.000668219	0.271457	0.363845	0.0794588	0.90333	0.0145552	0.971484	-0.00846871	10368173	4933406P04Rik
-0.211183	-0.310949	-0.135437	-0.425195	-0.490581	-0.264929	-0.011147	0.161792	0.182985	-0.177805	-0.0482445	0.0226016	0.00614071	0.117208	0	0.0440168	-0.0252924	0.0197439	0.062912	0.0531907	0.071763	-0.150523	-0.152038	-0.0802331	1.92e-05	-0.328076	0.000271693	-0.347495	0.000848047	-0.319202	0.000129935	-0.369001	0.0878113	-0.178781	10507903	4933407E24Rik
-0.0641556	-0.166754	0.000371	-0.0545206	-0.215434	-0.0390801	0.176399	0.203125	0.0772891	0.167001	0.0726776	0.0391612	-0.102781	0.0736461	-0.0292683	-0.0362511	-0.112841	0.0547266	0.128204	0	0.194694	-0.282318	-0.349059	-0.238772	0.0102201	-0.212538	0.556034	-0.070461	0.656948	-0.0584737	0.0856433	-0.197561	0.102972	0.200121	10585940	4933407I18Rik
-0.259306	-0.00299788	-0.261186	-0.234257	-0.081532	0.0141969	-0.141208	-0.0839124	-0.0708699	-0.15712	-0.0604677	-0.0245614	0.00630903	0.0739369	-0.0123277	-0.0931272	0.246576	0.0121298	0.0498977	-0.111817	-0.0438623	-0.0670042	0.113901	-0.0822463	0.666792	-0.0478237	0.2452	-0.160153	0.179371	-0.192706	0.535538	-0.102253	0.527551	-0.12573	10347988	4933407L21Rik
-0.22451	-0.103027	-0.158841	-0.0956793	-0.202622	-0.120798	0.228064	0.851243	0.173997	0.160695	0.94651	0.137658	-0.234161	-0.188742	-0.261851	0.00423288	0.426309	-0.16356	0.059226	0.337784	0.0140142	0.293644	-0.0611415	0.0407634	0.00644775	-0.567274	0.815478	0.0773384	0.43673	-0.239907	0.358119	-0.287921	0.554437	-0.242002	10458130	4933408B17Rik
-0.0391064	0.0277305	-0.0677881	-0.227409	-0.063097	-0.101504	0.0139933	0.364248	0.334436	-0.093946	-0.0410619	0.0382752	-0.00218153	-0.0460796	-0.0619469	0	-0.0204611	0.0450726	-0.0510235	0.0529389	0.113349	-0.0826545	0	-0.234325	0.0663394	-0.181187	0.789878	-0.0417931	0.574628	-0.0867329	0.451066	-0.116951	0.935549	0.0271307	10365812	4933408J17Rik
0.0004575	-0.112428	-0.134184	-0.0544901	-0.151408	-0.0878515	0.0171225	0.130833	0.0191693	-0.0469625	0.0664353	-0.0183005	0.0737121	0.0368559	0.0832381	-0.0107548	-0.0275869	0.117721	-0.0551104	3.36e-05	-0.103683	-0.108909	-0.0556729	-0.0993569	0.328461	-0.118034	0.331456	-0.154586	0.525057	-0.116444	0.864707	-0.0370642	0.930324	-0.00200439	10472443;10472449	4933409G03Rik
-0.0892382	-0.0755062	-0.0507503	-0.102304	-0.0226402	-0.0379744	-0.0231171	0.0187426	-0.034924	-0.0567889	-0.00584269	-0.0669322	0.00631619	0.0616512	0.043323	0.0251684	-0.0115662	0.0130591	-0.0351734	-0.06246	-0.0398731	-0.0230141	-0.108272	0.00194645	0.823427	-0.0349251	0.625139	-0.100166	0.755539	-0.0719559	0.954432	-0.0172333	0.971042	-0.0199556	10369038	4933411G06Rik
-0.212897	-0.310873	-0.263522	-0.31806	-0.302543	-0.236178	-0.193634	-0.146808	-0.0237465	-0.239975	-0.138307	-0.148312	0.154155	0.784817	0.143568	0.0368815	-0.061213	0.0331745	0.634941	0.578392	0.332116	-0.175689	-0.320616	-0.163172	0.214769	-0.125548	6.8e-06	-0.634859	0.0426421	-0.27696	9.31e-08	-0.789162	0.843642	-0.0541864	10463209	4933411K16Rik
-0.104512	-0.0871091	-0.0148454	-0.14399	-0.171867	-0.0308156	0.0399504	0.152129	0.210182	-0.0117126	0.0861897	0.124084	0.0366821	-0.00772524	0.0562129	0	-0.113421	0.0706129	0	0	-0.110578	-0.26742	-0.188695	-0.0666189	0.0155301	-0.192327	0.26048	-0.12058	0.522196	-0.0779205	0.683258	-0.0553307	0.623816	0.0820547	10436498	4933411O13Rik;4933411O13Rik
-0.371462	-0.343969	-0.0669136	-0.135462	-0.156209	-0.035255	0.177632	0.200582	0.112569	0.142247	0.254154	0.184859	-0.0800757	-0.11719	-0.0426235	-0.149288	0.362143	0.328717	0.203961	0	-0.0340013	0	-0.159673	0.0960331	0.00201596	-0.363552	0.527906	-0.104915	0.0189524	-0.365402	0.139165	-0.241532	0.438913	-0.163665	10464407	4933412A08Rik
-0.16954	-0.321921	-0.330395	-0.177018	-0.155685	-0.185893	-0.241351	0.216066	-0.2159	-0.281375	0.192805	-0.0517244	0.0197434	0.156333	-0.0571718	0.0540428	0	0.219945	-0.0973105	-0.0799355	0.170678	-0.210318	-0.327635	-0.303546	0.117272	-0.159829	0.0493822	-0.263044	0.0228759	-0.314738	0.125643	-0.221219	0.836204	0.0570906	10428910	4933412E24Rik
0.0150528	-0.0389709	0	-0.16763	-0.0384088	-0.104665	0.0502443	0.166272	0.188421	-0.136952	-0.041316	0.109345	0.0150528	-0.0493574	-0.0704665	-0.0630264	-0.188365	-0.242704	-0.180999	-0.0893993	-0.0614037	-0.0160027	-0.0465445	-0.127756	0.146788	-0.111773	0.871448	-0.0208467	0.331559	0.108928	0.676037	0.0548304	0.980265	0.00766388	10413270	4933413J09Rik
-0.126213	0	-0.140457	-0.164869	-0.103641	-0.188034	0.00421286	-0.138803	0.101672	-0.00615072	-0.139352	0.126677	-0.0280714	-0.00735855	0.0140905	0.12066	0.00421286	0.0282817	0.00671578	-0.0557313	-0.0586324	-0.0107083	-0.113725	-0.278203	0.229765	-0.111912	0.37535	-0.113423	0.186841	-0.171587	0.576438	-0.0846531	0.970297	0.0136765	10385671	4933414I15Rik
-0.551613	-0.346797	-0.225483	-0.448417	-0.0222273	0.0510387	-0.379325	0.318189	-0.244878	-0.258962	0.525608	0.0222278	-0.171359	-0.456405	-0.257765	0.167176	0.148589	-0.158879	1.17466	1.58589	1.22341	1.06354	1.17268	1.49734	0.113597	-0.254393	0.889533	0.0379265	0.170254	-0.309545	4.98e-10	-1.58524	2.42e-09	-1.50177	10375322	4933415A04Rik
0.0956764	0.00792122	-0.1475	0.00209618	-0.186198	-0.17099	-0.115507	0.141855	0.0305052	-0.111599	0.147278	0.0616598	0.167813	0.0552463	-0.0198712	-0.0407247	0.0388837	0.0301685	-0.0973825	-0.0519004	-0.0385747	-0.0228896	-0.168931	-0.211661	0.452645	-0.0921977	0.414333	-0.134229	0.690187	-0.0759416	0.988054	-0.00387995	0.827865	0.0679947	10353519	4933415F23Rik
-0.283314	-0.285542	-0.208889	-0.201479	-0.170555	-0.27575	-0.128504	-0.130518	-0.108726	-0.121479	-0.124089	-0.0871892	-0.0926189	-0.118502	0.07162	0	-0.0205407	-0.110067	0.15841	0.00808144	0.0875125	-0.152721	-0.0280557	-0.0984106	0.0696329	-0.120837	0.028724	-0.191088	0.0320925	-0.194052	0.000359842	-0.322256	0.163354	-0.144525	10372524	4933416C03Rik
-0.124939	-0.143085	-0.176504	-0.100131	-0.125191	-0.143204	0.00685978	0.0496359	-0.0949097	-0.00657654	0.0427513	-0.18841	-0.0399251	-0.0612555	0.000127	-0.0371327	-0.140432	-0.109853	0.0508842	-0.0840287	-0.0578146	0.133028	0.154171	0.040237	0.334857	-0.103734	0.497994	-0.101824	0.828946	-0.0397031	0.535015	-0.105189	0.123913	-0.244654	10404566	4933417A18Rik
-0.39623	-0.292701	-0.280064	-0.263504	-0.133244	-0.0621471	-0.0116062	0.0087285	0.0622139	-0.0254507	0.0309439	0.0866518	-0.0522866	-0.0421867	0.103358	-0.252402	0.085002	0	0.30124	-0.0255928	0.23028	-0.0413261	0.077249	-0.136203	0.00396431	-0.263229	0.040978	-0.240944	0.147019	-0.182182	0.000816239	-0.406624	0.13646	-0.204555	10562643	4933421I07Rik
0.0926986	0.302541	-0.0524902	0.0113368	0.185506	-0.116967	0.152065	0.180694	0.337517	0.0014782	0.0318251	0.212625	-0.0412984	-0.0432568	-0.0793505	-0.0499172	-0.0142722	0.0105786	0.158071	0.107387	0.0105786	-0.0620689	-0.0847101	-0.117332	0.295087	-0.082263	0.227488	0.125073	0.445267	0.0883079	0.887983	-0.0215747	0.193699	0.158475	10407024	4933425L06Rik
-0.090106	-0.125112	-0.0532541	-0.123851	-0.140275	-0.0807405	0.106282	0.187169	0	0.0297265	0.181524	-0.0764203	0.00943947	0.00504303	0.0835628	0.0509272	-0.0498109	0.138193	-0.113516	-0.0558167	-0.000572	-0.210262	-0.0973029	-0.103667	0.00289374	-0.173603	0.0728955	-0.134905	0.05721	-0.14866	0.635418	-0.0455883	0.816089	0.034854	10539921	4933427D06Rik
0.14776	0	-0.110875	0.363005	0.244142	0.0191641	0.0474396	-0.268811	-0.0654249	0.0703883	-0.106565	0.0348854	-0.256716	-0.154939	0.0172849	0.0759468	-0.156812	0.245255	0.0158329	0.0414057	-0.163656	0.151344	0.141766	0.10479	0.211504	0.158547	0.148454	0.241989	0.796094	0.055736	0.461719	0.146005	0.962563	-0.0221005	10388132	4933427D14Rik
0.0235643	-0.422274	-0.294535	0.0033865	-0.340413	-0.245596	-0.147924	0.194288	0.134319	-0.0676417	0.0990996	0.161887	0.0947623	-0.196653	0.332925	0	0.198326	0.265265	-0.0607333	-0.0588794	-0.277548	-0.167588	-0.174957	-0.132164	0.0104193	-0.274982	0.038071	-0.289656	0.0107818	-0.367175	0.656872	-0.0802574	0.856329	-0.0544078	10424660	4933427E11Rik
-0.116412	-0.0646591	-0.0724134	-0.0896902	-0.0977902	-0.0796766	-0.0489664	0.0414777	0.12919	-0.0461063	0.0182571	0.0979743	-0.0125489	0.00492048	0.00966263	-0.0209117	0.0428309	-0.0538297	-0.0245357	0.0123286	0	-0.107158	-0.0628882	-0.0950847	0.0209662	-0.118745	0.203778	-0.0874516	0.307244	-0.0761367	0.277414	-0.0827045	0.994335	0.00160345	10374739	4933427E13Rik
0.00100326	-0.262273	-0.090805	-0.00376892	-0.199021	-0.0501757	0.0117168	0.0333862	-0.0314674	-0.0198765	-0.00806808	0.0720587	0.013217	-0.0406871	-0.028986	-0.211529	0.00141001	-0.0192962	0.140205	-0.135158	-0.104229	-0.207199	-0.101411	0.061985	0.594504	-0.110465	0.789008	-0.0820214	0.945692	-0.0243683	0.856691	-0.0677797	0.980784	-0.0186318	10557060	4933427G17Rik
-0.136527	-0.125686	-0.2371	-0.0497565	-0.0484076	-0.161896	-0.0962496	0.0322261	-0.140451	-0.0638495	0.172923	0.0074482	0.0762	0	0.0504823	-0.0687923	-0.146707	0.226852	-0.0211134	0.135917	0.0640373	-0.00164223	-0.190033	-0.0884004	0.39227	-0.111904	0.329681	-0.16879	0.498752	-0.130346	0.327954	-0.186176	0.939082	-0.0332035	10507880	4933427I04Rik
-0.237316	-0.264714	-0.119802	-0.412241	-0.371518	-0.336176	0.0833421	0.18029	0.194197	-0.154546	-0.0193782	0.0731974	0.151049	0.16551	0.0904512	-0.00726938	0	-0.173991	0.432524	0.222405	0.0187578	-0.0432563	-0.190621	-0.0989771	0.0240794	-0.349811	0.0358617	-0.425965	0.307061	-0.229874	0.0142557	-0.514857	0.562481	-0.179343	10404129	4933427I18Rik
-0.36542	-0.49023	-0.466208	-0.194384	-0.0569434	-0.211107	0.220535	0.00382566	-0.103753	0.278047	0.0652661	0.11784	-0.174696	0.777555	0.0265493	-0.171993	-0.262015	-0.0226006	0.300308	0.264565	0.140451	-0.251727	-0.103076	0	0.00646747	-0.394342	0.00713085	-0.507185	0.507778	-0.145179	0.00590499	-0.53249	0.518904	-0.179114	10390426	4933428G20Rik
-0.267031	0.00521755	-0.129846	-0.313538	-0.0351868	-0.196411	-0.0340018	0.262575	-0.0397654	-0.0963488	0.0891957	-0.0150022	0.00561094	0	0.0455866	-0.0539012	0.0963888	0.122955	-0.0721393	-0.108642	-0.0741243	-0.324271	-0.0719824	-0.209252	0.166934	-0.183908	0.341713	-0.173198	0.266886	-0.21128	0.764281	-0.0711641	0.913779	0.0457029	10601978	4933428M09Rik
-0.0441175	-0.0090785	-0.102372	-0.0743098	-0.135718	-0.171997	0.0450945	0.138169	0.115748	-0.119413	0.0427132	-0.0909615	-0.0677066	-0.0169559	-0.0874772	0.0311212	0.105509	0.0329061	0.0595984	-0.0674591	-0.108904	-0.166524	0	0	0.22403	-0.11149	0.827135	-0.0322188	0.262186	-0.146111	0.753813	-0.050677	0.905094	-0.0340905	10363559	4933428P19Rik
0.00851345	-0.159445	-0.143807	-0.0582385	-0.289601	-0.0993485	0.21624	0.374042	0.103613	-0.0911121	-0.0735187	0.070653	-0.0174551	-0.167178	-0.0174551	0.148387	0.12497	0.175594	0.111782	0.0105538	0.0223899	-0.208252	-0.232043	-0.32918	0.0814549	-0.223641	0.781962	-0.0562917	0.1265	-0.273305	0.382864	-0.171896	0.62546	0.132837	10497644	4933429H19Rik
-0.200517	-0.148911	-0.144692	-0.123362	-0.120794	-0.0743513	-0.0123615	0.0353794	0.0532346	-0.0274563	0.00206518	0.00098	0.015089	0.0104985	0	-0.0114474	0.00139093	-0.199305	0.00476456	-0.0821214	-0.105031	-0.169385	-0.0875306	-0.0122666	0.0197564	-0.144078	0.0762024	-0.143967	0.482916	-0.0656508	0.438653	-0.0746417	0.759661	-0.0457102	10505308	4933430I17Rik
-0.287502	0.13797	-0.236859	0.0190988	0.273279	-0.0412755	0.182587	-0.367749	-0.395306	0.303586	-0.11474	-0.0865698	0.0920568	-0.0542154	0.18974	0.587292	0.99371	1.07597	0	-0.184584	-0.289325	0.504169	0.0905213	-0.149556	0.767021	0.0571504	0.712799	-0.0984087	0.000127278	-0.908206	0.644647	0.135422	0.64936	-0.170926	10501183	4933431E20Rik
-0.121044	0.0135727	-0.0610065	-0.241839	-0.116967	-0.190996	0.085403	0.0718222	0.185403	-0.0316887	0.0835919	0.111129	0.117428	0.0171881	0	-0.0204768	-0.139266	-0.0816112	0.028245	-0.0476074	-0.116321	-0.149318	-0.233863	-0.10596	0.00420523	-0.20399	0.0748357	-0.164585	0.736841	-0.0392616	0.506425	-0.0744854	0.812931	0.0433339	10438289	4933432I09Rik
-0.138404	0.0056386	-0.113091	0.234328	0.389755	0.226416	-0.726167	-0.43929	-0.556139	-0.370882	-0.0683565	-0.326153	-0.136775	0.120402	-0.0681291	-0.107817	-0.0271511	-0.0558219	0.377176	0.013135	-0.134073	0.1232	0.204029	0.133586	0.0279993	0.515272	0.711523	0.128941	0.651802	0.16437	0.975392	0.0153611	0.948143	-0.0528311	10405731;10409986	4933434E20Rik
0.137335	0.116238	-0.186096	0.428363	0.565481	0.245506	-0.498757	-0.257526	-0.192131	-0.074759	0.0700147	0.131405	0.0658639	0.29781	-0.126423	0.0129116	0.138605	-0.0727377	0.41943	0.15692	0.257925	0.398693	0.575256	0.638822	0.239006	0.354764	0.551196	0.138721	0.517512	0.191545	0.921269	-0.0602872	0.413641	-0.319786	10493612;10493626	4933434E20Rik;1700094D03Rik
-0.237825	-0.272942	-0.125922	-0.370437	-0.327508	-0.18473	0.0880475	0.32734	0.088417	0.0113683	0.0676632	0.124214	0.0387664	-0.220763	0	-0.0716762	0.0492277	-0.149894	0.0668812	-0.0288258	0.252186	-0.224343	-0.104558	-0.00495577	0.00164923	-0.371069	0.211533	-0.192562	0.230627	-0.19578	0.0253254	-0.349975	0.525937	-0.141942	10382336	4933434M16Rik
-0.0690227	-0.101071	-0.0892577	-0.0183425	-0.0743709	-0.0546517	0	0.023685	0.0231409	0.0132546	0.0388861	0.0637846	-0.00547743	0.0128889	0.0105076	-0.0737205	0.00595045	-0.0866079	-0.016737	-0.0538545	0	-0.033946	-0.0392098	-0.0182009	0.0983253	-0.0949113	0.351583	-0.0737591	0.872398	-0.0163267	0.649556	-0.0442556	0.800003	-0.0373338	10604885	4933436I01Rik
0.399676	0.209107	0.147881	0.386078	0.0243149	-0.0054059	-0.0505905	-0.0210547	0.231998	0.0496106	0.00587463	0.334679	-0.094028	0.2645	-0.238328	-0.216257	-0.0741844	-0.0727067	0.21062	0.0824904	-0.130706	0	0.178442	-0.00216627	0.434209	0.101856	0.195395	0.216227	0.065781	0.314658	0.480897	0.139474	0.60088	0.13485	10376507	4933439C10Rik
-0.185295	-0.0622773	-0.203311	-0.154938	-0.130134	-0.147075	-0.0511489	-0.0592279	0.408207	-0.1043	0.00350714	0.207264	-0.0918593	0.0570064	0.131906	0.086967	-0.103435	0.185973	0.111757	-0.0253534	-0.104893	-0.227261	-0.0665832	-0.222731	0.0396096	-0.214555	0.199267	-0.179523	0.164475	-0.203673	0.377199	-0.141009	0.945556	0.0250198	10567739	4933440M02Rik
-0.0503106	-0.132751	-0.132967	-0.024569	-0.391775	-0.225176	0.172187	0.200287	0.177601	0.0529919	0.0989742	-0.00558329	0.0396266	0.0537162	0.0344749	-0.0636511	-0.108813	0.127114	-0.18158	-0.108663	0.157856	-0.458003	-0.26441	-0.425252	0.0439618	-0.275668	0.277037	-0.202197	0.487895	-0.144475	0.613441	-0.115463	0.349033	0.222964	10547204	4933440N22Rik
1.32345	0.955941	1.17793	0.660416	0.26238	0.361288	1.33174	1.30652	0.960049	0.526448	0.740871	0.368959	1.2054	-0.0131764	0.185759	-0.0178957	-0.192401	0.0594096	0	-0.012032	-0.0979543	-0.203399	-0.00868416	-0.164586	0.711401	-0.0821981	0.222072	0.330906	0.00200071	0.84053	0.00236594	0.826896	0.000844635	0.915791	10416423	5031414D18Rik
-0.115221	-0.0727649	-0.329913	0.0448523	-0.00093	-0.158411	0.0691929	-0.223165	-0.33341	0.196143	-0.170099	-0.138258	0.784472	-0.0287581	-0.172493	0.213285	0.00158978	0.965218	0.1064	0	0.0214491	-0.0548873	0.259792	-0.135274	0.984278	-0.00546506	0.321914	-0.299805	0.102255	-0.498762	0.698203	-0.148014	0.82695	-0.128608	10528482	5031425E22Rik
-0.927601	-1.02921	-0.716376	-0.332946	-0.406236	-0.306354	-0.330983	-0.431965	-0.334825	0.0793376	-0.0308428	0.24626	0.00932169	0.258658	0.575945	0	-0.258913	-0.757109	-0.428192	-0.290963	-0.416522	0.763743	1.1144	0.587909	0.068495	-0.48595	0.0102206	-0.901095	0.488602	-0.281113	0.583415	-0.241228	8.8e-05	-1.4418	10546812	5031434C07Rik
1.40004	1.33222	0.977566	0.634899	0.549976	0.467257	0.682899	0.256347	0.476587	-0.0455623	-0.254076	-0.0085392	0.0558548	-0.0907517	-0.163837	-0.000324	0.148165	0	-0.40468	-0.27506	0.0853386	-0.107292	-0.186389	-0.142974	0.000976003	0.709051	0.000576174	0.959905	0.00265175	0.84438	0.000118998	1.09179	0.000267295	1.03921	10431170	5031439G07Rik
0.135275	0.130632	0.0899921	0.0889468	0.19857	-0.0557165	0.0346012	0.0881696	-0.190061	-0.0396957	-0.041852	-0.145397	0.0544329	-0.105785	-0.0564499	0.279218	-0.127141	0.088459	-0.0238023	-0.109772	-0.017323	-0.104655	0.347152	0.178522	0.290011	0.146989	0.492965	0.133884	0.944035	0.0177713	0.494698	0.148249	0.924381	-0.0423899	10404895	5033430I15Rik
-0.00418615	-0.00609493	-0.135759	-0.0875788	-0.116391	-0.144552	0.0769005	0.136367	0.000335	0.0256519	0.0995159	0.00099	-0.0318871	-0.0135035	0.0895781	0.0551815	0.0669632	7.92e-05	-0.0101113	-0.00991726	-0.00827551	-0.0572329	-0.139292	-0.0701127	0.00708354	-0.139054	0.153201	-0.0971562	0.079551	-0.123168	0.345208	-0.0729923	0.975189	0.00645224	10411390	5330416C01Rik
-0.169659	-0.112799	0	-0.11319	-0.13537	-0.0715852	-0.0336485	0.00201607	0.0210538	-0.0170784	0.0187607	-0.0216141	-0.00720453	0.148379	0.00620318	-0.0307412	-0.0190067	-0.0733581	0.0787196	0.370967	0.0365691	-0.203032	-0.120902	-0.260278	0.217371	-0.0953488	0.142159	-0.14956	0.624692	-0.0593986	0.011324	-0.262519	0.528496	0.0943031	10501374	5330417C22Rik
0.791075	0.95781	0.325894	0.744216	0.841468	0.228047	0.590264	0.202893	0.203953	0.523913	0.0261788	0.151948	0.074687	-0.0950675	-0.0329928	-0.195938	-0.0517063	0.0553808	0	-0.0605168	-0.0526853	-0.297805	-0.382191	-0.372754	0.0219556	0.364893	0.00164086	0.665876	0.000915966	0.712173	0.00140097	0.685819	8.19e-06	0.999002	10566630	5330417H12Rik
0.0600796	-0.0109124	0.00689745	0.0357575	0.0109835	0.0780621	0.00765133	-0.0600615	0.114452	0.00862074	-0.0795522	0.0684233	-0.0512128	-0.0121126	-0.0967279	-0.264469	0.166091	0.0640306	0.00865984	-0.139227	0.237431	-0.0787225	-0.198057	-0.0997462	0.832984	0.0202223	0.489554	0.0834957	0.770788	0.0415935	0.976633	-0.00547687	0.262378	0.155653	10497197	5330432E05Rik
-0.160612	-0.243702	-0.399492	0.243964	-0.0509172	-0.0206428	-0.205211	-0.115292	-0.213527	0.113778	0.00652504	0.109259	0.456519	0	0.0244737	-0.0257459	-0.0452952	0.00204945	0.0995798	0.26871	0.214389	-0.0930672	0.121698	0.404018	0.729793	-0.0544891	0.162942	-0.265565	0.728246	-0.0822364	0.139875	-0.29946	0.299021	-0.24945	10366519	5330438D12Rik
-0.0435638	-0.183412	-0.234851	-0.0925226	-0.156184	-0.265891	-0.170145	0.0334787	0.0324779	-0.0930462	0.0739441	0.0409956	0.295704	-0.0197043	0.136701	0.0266294	-0.0259662	0.0628934	0.0968699	-0.104696	-0.0195203	-0.0680008	0.132949	-0.344518	0.0826535	-0.149022	0.00792704	-0.300304	0.123872	-0.183923	0.220148	-0.153622	0.730944	-0.0695474	10542662	5330439B14Rik
0.13318	-0.0115037	-0.0638037	-0.0327449	-0.052031	-0.0859737	0.0636821	-0.043715	0.0132284	-0.0232525	-0.0737987	-0.0294561	0.0690622	-0.0363741	0.0258403	0.169369	0.1497	0.0919971	0	-0.0854659	-0.0492268	-0.0847993	-0.0720739	-0.0642309	0.963248	-0.00326093	0.667236	-0.0383224	0.0533402	-0.155835	0.813356	0.0260847	0.676028	0.0548885	10542223	5430401F13Rik
-0.421711	-0.315175	-0.343023	-0.184761	-0.200147	-0.182631	0.429496	0.015173	0.643563	0.61186	0.204222	0.75158	0.223487	-0.116376	1.4734	0.015173	-0.344044	-0.138285	-0.29153	-0.137059	0.0813484	-0.057056	-0.122653	-0.00350237	0.0135814	-0.717224	0.0344559	-0.801411	0.812741	-0.118856	0.757556	-0.158828	0.761197	-0.213504	10446423	5430411C19Rik
-0.279573	-0.441355	-0.41543	-0.19872	-0.357621	-0.313438	0.0598817	-0.240405	-0.105393	-0.00878382	-0.181954	0.00878429	-0.402958	-0.195249	0	0.721098	1.4252	1.88057	-0.408755	-0.304726	-0.475479	1.25913	1.82724	2.21501	0.203835	-0.256378	0.653744	-0.134954	2.34e-08	-1.67665	0.875514	0.0619634	1.34e-10	-2.10148	10504419	5430416O09Rik
-0.0254221	-0.263389	-0.249826	-0.133679	-0.358226	-0.303336	-0.0309753	0.0995326	0.0280132	-0.146564	0.101794	-0.00429583	0	0.169091	0.0933695	-0.00551557	-0.0153971	0.0480571	0.0843253	-0.0225029	0.0297489	-0.189374	-0.031168	-0.202478	0.00146453	-0.23023	0.000976124	-0.3098	0.0151374	-0.231361	0.00786059	-0.252837	0.563985	-0.0813065	10558192	5430419D17Rik
0.467088	0.0622783	0.0785623	0.312671	-0.0187268	0.0535016	0.0724721	-0.049922	0	-0.0240297	-0.147245	-0.0232768	0.11708	-0.134417	0	-0.082891	0.0287051	0	-0.127447	-0.00114822	-0.0623798	0.014226	-0.0494881	-0.0525656	0.0245076	0.187896	0.136467	0.165008	0.126817	0.177291	0.0528072	0.222887	0.14046	0.188505	10542267	5530400C23Rik
-0.000933	-0.0738749	-0.0534124	-0.0257845	-0.113175	-0.111969	0.0214338	0.0908661	0.0290585	-0.0069375	0.0217013	0.00140572	0.0112453	-0.129931	-0.017261	0.102191	0.0868144	0.0945783	-0.0662856	0	0.0342002	-0.0740271	-0.0850291	-0.00415945	0.0497907	-0.0894462	0.807167	-0.0178758	0.0105585	-0.15772	0.465918	-0.0524964	0.958913	-0.00878633	10379505	5530401A14Rik
0.362591	0.814109	0.595983	0.263363	1.07642	0.619806	-0.274885	-0.166477	0.0723033	-0.19936	-0.0943584	0.258941	0.0528479	1.19819	-0.168316	0.488452	-0.0425415	0.150357	-0.0326891	0	-0.0776172	0.166	-0.0913014	0.0316472	0.000133105	0.689352	0.257722	0.261138	0.0701503	0.42329	0.00416444	0.658815	0.0128796	0.586598	10423568	5730407I07Rik
0.0740118	0.198722	0.275222	0.0167036	0.0110941	0.139843	2.45302	2.33843	1.10032	2.51684	2.43268	1.02516	1.4432	0.302237	1.23514	-0.461119	-0.645882	-0.438014	0	0.325041	-0.315412	-0.0650921	-0.0791225	0.472677	0.000233377	-1.85848	0.172768	-0.87426	0.368928	0.634271	0.904475	0.116057	0.996281	0.0097785	10465831	5730408K05Rik
-0.11036	-0.49553	0.0139275	-0.100747	-0.208118	-0.0416584	-0.0949602	-0.36629	-0.12868	-0.112651	-0.227013	-0.143244	-0.0635037	-0.12795	-0.00295067	-0.100753	0.294507	0.122221	0.0548878	0	0.156766	-0.323556	-0.168316	0	0.844499	0.0217256	0.508306	-0.0922795	0.0473298	-0.262406	0.0946738	-0.227632	0.985822	0.00687655	10508178	5730409E04Rik
0.0987983	-0.204019	-0.0785055	-0.151936	-0.359401	-0.31738	0.106636	0.0466099	0.299871	-0.0852218	-0.226709	0.136519	0.247041	0.285391	0	0.018259	-0.0209532	-0.152868	-0.0948319	-0.161677	-0.0623431	-0.0166893	0.0249228	-0.0644326	0.037024	-0.215025	0.0106889	-0.346218	0.452118	-0.116887	0.73008	-0.0624565	0.425557	-0.150008	10461051	5730409K12Rik
0	0.116129	0.215167	0.280575	0.333929	0.393789	-0.275809	-1.67277	-0.65662	-0.22919	-1.26597	-0.604035	-0.119104	-0.635022	-1.03976	-0.173011	0.276909	0.092452	0.611007	0.308989	0.335747	0.425854	0.736533	0.815091	0.00383312	1.00733	0.0684633	0.821227	0.787229	0.157815	0.747777	-0.195316	0.509443	-0.435894	10389010	5730455P16Rik
-0.0301442	-0.2295	-0.0524597	-0.0369887	-0.203149	-0.0835218	0.0505323	0.164942	0.0689588	0.00231695	0.127699	0.0343714	0.0242796	-0.00789261	0.0276828	0.0359197	0.0136237	0.164779	0.0386314	0.0465493	-0.181791	-0.267294	-0.138313	-0.157625	0.0104659	-0.180764	0.198749	-0.120651	0.0647969	-0.177401	0.511262	-0.0737573	0.557899	0.0817834	10502900	5730460C07Rik
-0.161466	-0.151922	-0.0244393	-0.0808101	-0.209087	-0.313997	-0.0841332	0.528364	-0.00481749	-0.221767	0.429206	0.0605507	0.233811	-0.162746	0.0996451	-0.07693	-0.0473442	-0.20216	0.137195	0.22785	0.316917	0.306866	0.11722	0.0893364	0.041269	-0.274854	0.23977	-0.213857	0.838828	-0.0481421	0.0376534	-0.384274	0.103608	-0.328094	10489051	5730471H19Rik
-0.0625334	-0.0330448	0.102946	-0.150093	-0.254878	-0.267948	0.0501251	0.10222	0.332527	-0.0671792	0.0272155	0.0756545	0.167374	0.136855	0.303206	0	0.237546	-0.0235548	-0.0362043	-0.0218482	-0.185805	-0.18771	-0.145857	-0.118647	0.0841292	-0.197686	0.0368977	-0.313403	0.268521	-0.182256	0.897825	-0.0296392	0.913298	0.0398129	10394802	5730507C01Rik
-0.00948667	-0.14072	0.0406427	0.0129719	-0.0697064	-0.0210257	0.390195	0	0.495646	0.186057	-0.00924444	0.321174	0.257349	0.690438	0.00051	-0.208813	0.159994	0.00241947	0.00051	0.304192	-0.0638952	-0.469745	-0.302121	-0.22623	0.152357	-0.261859	0.152618	-0.34732	0.963689	-0.015754	0.726722	-0.11149	0.337883	0.301478	10502071	5730508B09Rik
[truncated: 20,963 more rows]

## Sheet: DAVID_liver specific genes
Category	Term	Count	%	PValue	Genes	List Total	Pop Hits	Pop Total	Fold Enrichment	Bonferroni	Benjamini	FDR
[truncated: 44 more rows]
