# Supplementary material for: Transcriptome and proteome profiling reveal complementary scavenger and immune features of rat liver sinusoidal endothelial cells and liver macrophages
Source: BMC Mol Cell Biol. 2020 Nov 27;21:85. doi: 10.1186/s12860-020-00331-9 (PMC7694354; doi:10.1186/s12860-020-00331-9)
Supplement: Supplementary file 10 — Additional file 10. Ion Torrent sequencing results. Excel file (.xls) summarizing the Ion Torrent PGM sequencing results, including number of mapped sequences and average lengths. [file 12860_2020_331_MOESM10_ESM.xlsx]

## Sheet: Sheet1
Samples	Total number of bases	Total number of sequences	Total number of sequences after adaptor trimming	Mean length [bp]	Mapped reads
LSEC.1	434315587	3697843	3467579	90.5	3174577
LSEC.2	356921036	3265039	3047137	82.2	2827298
LSEC.3	301437967	2574846	2400088	90.8	2151315
KC.1	109689527	918236	876110	90.1	825829
KC.2	469044038	3404876	3186476	112.6	3000353
KC.3	356550653	3025760	2849650	90	2650918
